# Supplementary material for: Probabilistic En Route Sector Traffic Demand Prediction Based upon Statistical Analysis of Error Distribution Characteristics
Source: Hindawi journal article supplement (doi:10.1155/2018/8184513), 2018-08-13
Supplement: f1 [file 8184513.f1.rar]

Archive with 18 entries (18 files):
- Fig.1 Fig.2.xlsx
- Fig.7 AR01.spv
- Fig.7 AR02.spv
- Fig.7 AR03.spv
- Fig.7 AR04.spv
- Fig.7 AR05.spv
- Fig.7 AR06.spv
- Fig.7 AR07.spv
- Fig.7 AR08.spv
- Fig.8 AR01-0700-0714.xlsx
- Fig.8 AR02-0700-0714.xlsx
- Fig.8 AR03-0700-0714.xlsx
- Fig.8 AR04-0700-0714.xlsx
- Fig.8 AR05-0700-0714.xlsx
- Fig.8 AR06-0700-0714.xlsx
- Fig.8 AR07-0700-0714.xlsx
- Fig.8 AR08-0700-0714.xlsx
- Fig.9.xlsx
