# Supplementary material for: Probabilistic En Route Sector Traffic Demand Prediction Based upon Statistical Analysis of Error Distribution Characteristics
Source: Hindawi journal article supplement (doi:10.1155/2018/8184513), 2018-08-13
Supplement: f1 [file 8184513.f1.rar › Fig.1 Fig.2.xlsx]

## Sheet: Fig.1
00:00:00	174
00:15:00	260
00:30:00	219
00:45:00	179
01:00:00	143
01:15:00	104
01:30:00	130
01:45:00	102
02:00:00	117
02:15:00	142
02:30:00	94
02:45:00	77
03:00:00	53
03:15:00	68
03:30:00	85
03:45:00	66
04:00:00	75
04:15:00	62
04:30:00	55
04:45:00	56
05:00:00	48
05:15:00	28
05:30:00	33
05:45:00	26
06:00:00	34
06:15:00	28
06:30:00	20
06:45:00	55
07:00:00	68
07:15:00	102
07:30:00	110
07:45:00	137
08:00:00	174
08:15:00	158
08:30:00	239
08:45:00	282
09:00:00	207
09:15:00	220
09:30:00	264
09:45:00	224
10:00:00	184
10:15:00	196
10:30:00	184
10:45:00	186
11:00:00	246
11:15:00	200
11:30:00	221
11:45:00	236
12:00:00	194
12:15:00	214
12:30:00	283
12:45:00	291
13:00:00	297
13:15:00	230
13:30:00	207
13:45:00	259
14:00:00	286
14:15:00	207
14:30:00	208
14:45:00	185
15:00:00	235
15:15:00	207
15:30:00	190
15:45:00	175
16:00:00	251
16:15:00	231
16:30:00	230
16:45:00	191
17:00:00	198
17:15:00	191
17:30:00	225
17:45:00	191
18:00:00	214
18:15:00	248
18:30:00	217
18:45:00	209
19:00:00	236
19:15:00	236
19:30:00	227
19:45:00	243
20:00:00	239
20:15:00	258
20:30:00	214
20:45:00	228
21:00:00	245
21:15:00	299
21:30:00	318
21:45:00	253
22:00:00	255
22:15:00	263
22:30:00	441
22:45:00	459
23:00:00	419
23:15:00	339
23:30:00	365
23:45:00	357

## Sheet: Fig.2
AR01	4552
AR02	12773
AR03	9957
AR04	9799
AR05	20639
AR06	1445
AR07	2169
AR08	1169
