# Supplementary material for: Probabilistic En Route Sector Traffic Demand Prediction Based upon Statistical Analysis of Error Distribution Characteristics
Source: Hindawi journal article supplement (doi:10.1155/2018/8184513), 2018-08-13
Supplement: f1 [file 8184513.f1.rar › Fig.8 AR01-0700-0714.xlsx]

## Sheet: 0700-0714
CALLSIGN	PASSSECTOR	EINSECTORTIME	EOUTSECTORTIME	OPINSECTORTIME	OPOUTSECTORTIME	ATD	FlyTime	Predicted Time Error ∆ti(in)	Predicted Time Error ∆ti(out)	probability distribution(in)	probability distribution(out)	The probability of the aircraft in AR01	0	0	1
DKH1290	ZGGGAR01	2014-05-01 07:07:43	2014-05-01 07:23:25	2014-05-01 07:01:55	2014-05-01 07:16:07	2014-05-01 06:54:00	1900-01-01 00:07:55	5.8	7.3	0.98524	0.979618	0.0200814	1	0	0.979919
CQH8963	ZGGGAR01	2014-05-02 07:11:17	2014-05-02 07:26:17	2014-05-02 07:10:48	2014-05-02 07:24:22	2014-05-02 06:42:00	1900-01-01 00:28:48	0.483333	1.91667	0.252493	0.241751	0.191452	1	1	0.0196781
CQH8554	ZGGGAR01	2014-05-04 07:10:17	2014-05-04 07:25:11	2014-05-04 07:09:17	2014-05-04 07:22:03	2014-05-04 06:41:00	1900-01-01 00:28:17	1	3.13333	0.34813	0.468146	0.185154	2	0	0.792311
CXA8043	ZGGGAR01	2014-05-04 07:13:23	2014-05-04 07:28:43	2014-05-04 07:12:24	2014-05-04 07:25:21	2014-05-04 06:44:00	1900-01-01 00:28:24	0.983333	3.36667	0.344841	0.515601	0.167041	2	2	0.00376741
CCA1724	ZGGGAR01	2014-05-05 07:07:53	2014-05-05 07:23:45	2014-05-05 07:03:10	2014-05-05 07:17:52	2014-05-05 06:55:00	1900-01-01 00:08:10	4.71667	5.88333	0.944884	0.907104	0.0877761	2	1	0.203518
CXA8043	ZGGGAR01	2014-05-07 07:09:23	2014-05-07 07:24:43	2014-05-07 07:07:32	2014-05-07 07:19:10	2014-05-07 06:40:00	1900-01-01 00:27:32	1.85	5.55	0.525583	0.875557	0.0654049	3	0	0.645611
CQH8963	ZGGGAR01	2014-05-08 07:09:17	2014-05-08 07:24:17	2014-05-08 07:08:58	2014-05-08 07:22:49	2014-05-08 06:40:00	1900-01-01 00:28:58	0.316667	1.46667	0.224887	0.176115	0.185281	3	3	0.000697553
CQH8963	ZGGGAR01	2014-05-13 07:14:17	2014-05-13 07:29:17	2014-05-13 07:13:48	2014-05-13 07:27:22	2014-05-13 06:45:00	1900-01-01 00:28:48	0.483333	1.91667	0.252493	0.241751	0.191452	3	1	0.312536
CQH8963	ZGGGAR01	2014-05-14 07:11:17	2014-05-14 07:26:17	2014-05-14 07:10:58	2014-05-14 07:24:49	2014-05-14 06:42:00	1900-01-01 00:28:58	0.316667	1.46667	0.224887	0.176115	0.185281	3	2	0.0407521
DKH1290	ZGGGAR01	2014-05-16 07:05:43	2014-05-16 07:21:25	2014-05-16 07:00:10	2014-05-16 07:14:50	2014-05-16 06:52:00	1900-01-01 00:08:10	5.55	6.58333	0.979463	0.953548	0.0454982	4	0	0.537768
CSS6883	ZGGGAR01	2014-05-21 07:06:17	2014-05-21 07:16:21	2014-05-21 07:04:53	2014-05-21 07:14:09	2014-05-21 06:37:00	1900-01-01 00:27:53	1.4	2.2	0.429962	0.289064	0.305676	4	4	0.00011652
CQH8963	ZGGGAR01	2014-05-22 07:11:17	2014-05-22 07:26:17	2014-05-22 07:10:58	2014-05-22 07:24:49	2014-05-22 06:42:00	1900-01-01 00:28:58	0.316667	1.46667	0.224887	0.176115	0.185281	4	1	0.368173
CSS6883	ZGGGAR01	2014-05-29 07:08:17	2014-05-29 07:18:21	2014-05-29 07:07:12	2014-05-29 07:16:50	2014-05-29 06:39:00	1900-01-01 00:28:12	1.08333	1.51667	0.364742	0.182796	0.298069	4	2	0.0861511
CXA8175	ZGGGAR01	2014-05-29 07:12:23	2014-05-29 07:27:43	2014-05-29 07:11:31	2014-05-29 07:24:39	2014-05-29 06:43:00	1900-01-01 00:28:31	0.866667	3.06667	0.322157	0.45464	0.175691	4	3	0.0073883
CQH8554	ZGGGAR01	2014-05-30 07:14:17	2014-05-30 07:29:11	2014-05-30 07:13:31	2014-05-30 07:26:39	2014-05-30 06:45:00	1900-01-01 00:28:31	0.766667	2.53333	0.303224	0.349728	0.197178	5	0	0.490565
								1.87054	1.95773				5	5	1.02276e-05
													5	1	0.383059
													5	2	0.110906
													5	3	0.0143018
													5	4	0.000754808
													6	0	0.458479
													6	6	6.68938e-07
													6	1	0.390091
													6	2	0.128706
													6	3	0.0206202
													6	4	0.00164085
													6	5	5.89269e-05
													7	0	0.373532
													7	7	1.23941e-07
													7	1	0.402762
													7	2	0.177136
													7	3	0.0406464
													7	4	0.00515735
													7	5	0.000352026
													7	6	1.1463e-05
													8	0	0.302019
													8	8	2.37288e-08
													8	1	0.397166
													8	2	0.220332
													8	3	0.0667775
													8	4	0.0119518
													8	5	0.00127202
													8	6	7.66645e-05
													8	7	2.29483e-06
													9	0	0.24606
													9	9	4.3965e-09
													9	1	0.379537
													9	2	0.253096
													9	3	0.0952282
													9	4	0.0221099
													9	5	0.00325077
													9	6	0.00029814
													9	7	1.60741e-05
													9	8	4.4452e-07
													10	0	0.234865
													10	10	2.00033e-10
													10	1	0.373464
													10	2	0.258849
													10	3	0.102411
													10	4	0.0254367
													10	5	0.00410883
													10	6	0.000432479
													10	7	2.89076e-05
													10	8	1.15564e-06
													10	9	2.44213e-08
													11	0	0.163072
													11	11	6.11451e-11
													11	1	0.331098
													11	2	0.293884
													11	3	0.15023
													11	4	0.0489659
													11	5	0.0106282
													11	6	0.00155625
													11	7	0.00015227
													11	8	9.63873e-06
													11	9	3.70207e-07
													11	10	7.60389e-09
													12	0	0.132858
													12	12	1.1329e-11
													12	1	0.299966
													12	2	0.300779
													12	3	0.176846
													12	4	0.0677282
													12	5	0.0177315
													12	6	0.00323712
													12	7	0.0004124
													12	8	3.60655e-05
													12	9	2.08749e-06
													12	10	7.47872e-08
													12	11	1.45867e-09
													13	0	0.0932574
													13	13	3.37683e-12
													13	1	0.250156
													13	2	0.300536
													13	3	0.213787
													13	4	0.100253
													13	5	0.0326339
													13	6	0.00755743
													13	7	0.00125436
													13	8	0.000148239
													13	9	1.22153e-05
													13	10	6.7471e-07
													13	11	2.33156e-08
													13	12	4.42737e-10
													14	0	0.0768729
													14	14	5.93279e-13
													14	1	0.22259
													14	2	0.291685
													14	3	0.229028
													14	4	0.1202
													14	5	0.044514
													14	6	0.0119632
													14	7	0.00236176
													14	8	0.000342575
													14	9	3.61135e-05
													14	10	2.70229e-06
													14	11	1.3776e-07
													14	12	4.46131e-09
													14	13	8.05686e-11
													15	0	0.0617152
													15	15	1.16981e-13
													15	1	0.193858
													15	2	0.278061
													15	3	0.241383
													15	4	0.141658
													15	5	0.0594376
													15	6	0.0183815
													15	7	0.00425494
													15	8	0.000740713
													15	9	9.65409e-05
													15	10	9.29024e-06
													15	11	6.43428e-07
													15	12	3.07449e-08
													15	13	9.44353e-10
													15	14	1.63626e-11
													#N/A	#N/A	#N/A
													#N/A	#N/A	#N/A
													#N/A	#N/A	#N/A
													#N/A	#N/A	#N/A
													#N/A	#N/A	#N/A
													#N/A	#N/A	#N/A
													#N/A	#N/A	#N/A
													#N/A	#N/A	#N/A
													#N/A	#N/A	#N/A
													#N/A	#N/A	#N/A
													#N/A	#N/A	#N/A
													#N/A	#N/A	#N/A
													#N/A	#N/A	#N/A
													#N/A	#N/A	#N/A
													#N/A	#N/A	#N/A
													#N/A	#N/A	#N/A
													#N/A	#N/A	#N/A
													#N/A	#N/A	#N/A
													#N/A	#N/A	#N/A
													#N/A	#N/A	#N/A
													#N/A	#N/A	#N/A
													#N/A	#N/A	#N/A
													#N/A	#N/A	#N/A
													#N/A	#N/A	#N/A
													#N/A	#N/A	#N/A
													#N/A	#N/A	#N/A
													#N/A	#N/A	#N/A
													#N/A	#N/A	#N/A
													#N/A	#N/A	#N/A
													#N/A	#N/A	#N/A
													#N/A	#N/A	#N/A
													#N/A	#N/A	#N/A
													#N/A	#N/A	#N/A
													#N/A	#N/A	#N/A
													#N/A	#N/A	#N/A
													#N/A	#N/A	#N/A
													#N/A	#N/A	#N/A
													#N/A	#N/A	#N/A
													#N/A	#N/A	#N/A
													#N/A	#N/A	#N/A
													#N/A	#N/A	#N/A
													#N/A	#N/A	#N/A
													#N/A	#N/A	#N/A
													#N/A	#N/A	#N/A
													#N/A	#N/A	#N/A
													#N/A	#N/A	#N/A
													#N/A	#N/A	#N/A
													#N/A	#N/A	#N/A
													#N/A	#N/A	#N/A
													#N/A	#N/A	#N/A
													#N/A	#N/A	#N/A
													#N/A	#N/A	#N/A
													#N/A	#N/A	#N/A
													#N/A	#N/A	#N/A
													#N/A	#N/A	#N/A
													#N/A	#N/A	#N/A
													#N/A	#N/A	#N/A
													#N/A	#N/A	#N/A
													#N/A	#N/A	#N/A
													#N/A	#N/A	#N/A
													#N/A	#N/A	#N/A
													#N/A	#N/A	#N/A
													#N/A	#N/A	#N/A
													#N/A	#N/A	#N/A
													#N/A	#N/A	#N/A
													#N/A	#N/A	#N/A
													#N/A	#N/A	#N/A
													#N/A	#N/A	#N/A
													#N/A	#N/A	#N/A
													#N/A	#N/A	#N/A
													#N/A	#N/A	#N/A
													#N/A	#N/A	#N/A
													#N/A	#N/A	#N/A
													#N/A	#N/A	#N/A
													#N/A	#N/A	#N/A
													#N/A	#N/A	#N/A
													#N/A	#N/A	#N/A
													#N/A	#N/A	#N/A
													#N/A	#N/A	#N/A
													#N/A	#N/A	#N/A
													#N/A	#N/A	#N/A
													#N/A	#N/A	#N/A
													#N/A	#N/A	#N/A
													#N/A	#N/A	#N/A
													#N/A	#N/A	#N/A
													#N/A	#N/A	#N/A
													#N/A	#N/A	#N/A
													#N/A	#N/A	#N/A
													#N/A	#N/A	#N/A
													#N/A	#N/A	#N/A
													#N/A	#N/A	#N/A
													#N/A	#N/A	#N/A
													#N/A	#N/A	#N/A
													#N/A	#N/A	#N/A
													#N/A	#N/A	#N/A
													#N/A	#N/A	#N/A
													#N/A	#N/A	#N/A
													#N/A	#N/A	#N/A
													#N/A	#N/A	#N/A
													#N/A	#N/A	#N/A
													#N/A	#N/A	#N/A
													#N/A	#N/A	#N/A
													#N/A	#N/A	#N/A
													#N/A	#N/A	#N/A
													#N/A	#N/A	#N/A
													#N/A	#N/A	#N/A
													#N/A	#N/A	#N/A
													#N/A	#N/A	#N/A
													#N/A	#N/A	#N/A
													#N/A	#N/A	#N/A
													#N/A	#N/A	#N/A
													#N/A	#N/A	#N/A
													#N/A	#N/A	#N/A
													#N/A	#N/A	#N/A
													#N/A	#N/A	#N/A
													#N/A	#N/A	#N/A
													#N/A	#N/A	#N/A
													#N/A	#N/A	#N/A
													#N/A	#N/A	#N/A
													#N/A	#N/A	#N/A
													#N/A	#N/A	#N/A
													#N/A	#N/A	#N/A
													#N/A	#N/A	#N/A
													#N/A	#N/A	#N/A
													#N/A	#N/A	#N/A
													#N/A	#N/A	#N/A
													#N/A	#N/A	#N/A
													#N/A	#N/A	#N/A
													#N/A	#N/A	#N/A
													#N/A	#N/A	#N/A
													#N/A	#N/A	#N/A
													#N/A	#N/A	#N/A
													#N/A	#N/A	#N/A
													#N/A	#N/A	#N/A
													#N/A	#N/A	#N/A
													#N/A	#N/A	#N/A
													#N/A	#N/A	#N/A
													#N/A	#N/A	#N/A
													#N/A	#N/A	#N/A
													#N/A	#N/A	#N/A
													#N/A	#N/A	#N/A
													#N/A	#N/A	#N/A
													#N/A	#N/A	#N/A
													#N/A	#N/A	#N/A
													#N/A	#N/A	#N/A
													#N/A	#N/A	#N/A
													#N/A	#N/A	#N/A
													#N/A	#N/A	#N/A
													#N/A	#N/A	#N/A
													#N/A	#N/A	#N/A
													#N/A	#N/A	#N/A
													#N/A	#N/A	#N/A
													#N/A	#N/A	#N/A
													#N/A	#N/A	#N/A
													#N/A	#N/A	#N/A
													#N/A	#N/A	#N/A
													#N/A	#N/A	#N/A
													#N/A	#N/A	#N/A
													#N/A	#N/A	#N/A
													#N/A	#N/A	#N/A
													#N/A	#N/A	#N/A
													#N/A	#N/A	#N/A
													#N/A	#N/A	#N/A
													#N/A	#N/A	#N/A
													#N/A	#N/A	#N/A
													#N/A	#N/A	#N/A
													#N/A	#N/A	#N/A
													#N/A	#N/A	#N/A
													#N/A	#N/A	#N/A
													#N/A	#N/A	#N/A
													#N/A	#N/A	#N/A
													#N/A	#N/A	#N/A
													#N/A	#N/A	#N/A
													#N/A	#N/A	#N/A
													#N/A	#N/A	#N/A
													#N/A	#N/A	#N/A
													#N/A	#N/A	#N/A
													#N/A	#N/A	#N/A
													#N/A	#N/A	#N/A
													#N/A	#N/A	#N/A
													#N/A	#N/A	#N/A
													#N/A	#N/A	#N/A
													#N/A	#N/A	#N/A
													#N/A	#N/A	#N/A
													#N/A	#N/A	#N/A
													#N/A	#N/A	#N/A
													#N/A	#N/A	#N/A
													#N/A	#N/A	#N/A
													#N/A	#N/A	#N/A
													#N/A	#N/A	#N/A
													#N/A	#N/A	#N/A
													#N/A	#N/A	#N/A
													#N/A	#N/A	#N/A
													#N/A	#N/A	#N/A
													#N/A	#N/A	#N/A
													#N/A	#N/A	#N/A
													#N/A	#N/A	#N/A
													#N/A	#N/A	#N/A
													#N/A	#N/A	#N/A
													#N/A	#N/A	#N/A
													#N/A	#N/A	#N/A
													#N/A	#N/A	#N/A
													#N/A	#N/A	#N/A
													#N/A	#N/A	#N/A
													#N/A	#N/A	#N/A
													#N/A	#N/A	#N/A
													#N/A	#N/A	#N/A
													#N/A	#N/A	#N/A
													#N/A	#N/A	#N/A
													#N/A	#N/A	#N/A
													#N/A	#N/A	#N/A
													#N/A	#N/A	#N/A
													#N/A	#N/A	#N/A
													#N/A	#N/A	#N/A
													#N/A	#N/A	#N/A
													#N/A	#N/A	#N/A
													#N/A	#N/A	#N/A
													#N/A	#N/A	#N/A
													#N/A	#N/A	#N/A
													#N/A	#N/A	#N/A
													#N/A	#N/A	#N/A
													#N/A	#N/A	#N/A
													#N/A	#N/A	#N/A
													#N/A	#N/A	#N/A
													#N/A	#N/A	#N/A
													#N/A	#N/A	#N/A
													#N/A	#N/A	#N/A
													#N/A	#N/A	#N/A
													#N/A	#N/A	#N/A
													#N/A	#N/A	#N/A
													#N/A	#N/A	#N/A
													#N/A	#N/A	#N/A
													#N/A	#N/A	#N/A
													#N/A	#N/A	#N/A
													#N/A	#N/A	#N/A
													#N/A	#N/A	#N/A
													#N/A	#N/A	#N/A
													#N/A	#N/A	#N/A
													#N/A	#N/A	#N/A
													#N/A	#N/A	#N/A
													#N/A	#N/A	#N/A
													#N/A	#N/A	#N/A
													#N/A	#N/A	#N/A
													#N/A	#N/A	#N/A
													#N/A	#N/A	#N/A
													#N/A	#N/A	#N/A
													#N/A	#N/A	#N/A
													#N/A	#N/A	#N/A
													#N/A	#N/A	#N/A
													#N/A	#N/A	#N/A
													#N/A	#N/A	#N/A
													#N/A	#N/A	#N/A
													#N/A	#N/A	#N/A
													#N/A	#N/A	#N/A
													#N/A	#N/A	#N/A
													#N/A	#N/A	#N/A
													#N/A	#N/A	#N/A
													#N/A	#N/A	#N/A
													#N/A	#N/A	#N/A
													#N/A	#N/A	#N/A
													#N/A	#N/A	#N/A
													#N/A	#N/A	#N/A
													#N/A	#N/A	#N/A
													#N/A	#N/A	#N/A
													#N/A	#N/A	#N/A
													#N/A	#N/A	#N/A
													#N/A	#N/A	#N/A
													#N/A	#N/A	#N/A
													#N/A	#N/A	#N/A
													#N/A	#N/A	#N/A
													#N/A	#N/A	#N/A
													#N/A	#N/A	#N/A
													#N/A	#N/A	#N/A
													#N/A	#N/A	#N/A
													#N/A	#N/A	#N/A
													#N/A	#N/A	#N/A
													#N/A	#N/A	#N/A
													#N/A	#N/A	#N/A
													#N/A	#N/A	#N/A
													#N/A	#N/A	#N/A
													#N/A	#N/A	#N/A
													#N/A	#N/A	#N/A
													#N/A	#N/A	#N/A
													#N/A	#N/A	#N/A
													#N/A	#N/A	#N/A
													#N/A	#N/A	#N/A
													#N/A	#N/A	#N/A
													#N/A	#N/A	#N/A
													#N/A	#N/A	#N/A
													#N/A	#N/A	#N/A
													#N/A	#N/A	#N/A
													#N/A	#N/A	#N/A
													#N/A	#N/A	#N/A
													#N/A	#N/A	#N/A
													#N/A	#N/A	#N/A
													#N/A	#N/A	#N/A
													#N/A	#N/A	#N/A
													#N/A	#N/A	#N/A
													#N/A	#N/A	#N/A
													#N/A	#N/A	#N/A
													#N/A	#N/A	#N/A
													#N/A	#N/A	#N/A
													#N/A	#N/A	#N/A
													#N/A	#N/A	#N/A
													#N/A	#N/A	#N/A
													#N/A	#N/A	#N/A
													#N/A	#N/A	#N/A
													#N/A	#N/A	#N/A
													#N/A	#N/A	#N/A
													#N/A	#N/A	#N/A
													#N/A	#N/A	#N/A
													#N/A	#N/A	#N/A
													#N/A	#N/A	#N/A
													#N/A	#N/A	#N/A
													#N/A	#N/A	#N/A
													#N/A	#N/A	#N/A
													#N/A	#N/A	#N/A
													#N/A	#N/A	#N/A
													#N/A	#N/A	#N/A
													#N/A	#N/A	#N/A
													#N/A	#N/A	#N/A
													#N/A	#N/A	#N/A
													#N/A	#N/A	#N/A
													#N/A	#N/A	#N/A
													#N/A	#N/A	#N/A
													#N/A	#N/A	#N/A
													#N/A	#N/A	#N/A
													#N/A	#N/A	#N/A
													#N/A	#N/A	#N/A
													#N/A	#N/A	#N/A
													#N/A	#N/A	#N/A
													#N/A	#N/A	#N/A
													#N/A	#N/A	#N/A
													#N/A	#N/A	#N/A
													#N/A	#N/A	#N/A
													#N/A	#N/A	#N/A
													#N/A	#N/A	#N/A
													#N/A	#N/A	#N/A
													#N/A	#N/A	#N/A
													#N/A	#N/A	#N/A
													#N/A	#N/A	#N/A
													#N/A	#N/A	#N/A
													#N/A	#N/A	#N/A
													#N/A	#N/A	#N/A
													#N/A	#N/A	#N/A
													#N/A	#N/A	#N/A
													#N/A	#N/A	#N/A
													#N/A	#N/A	#N/A
													#N/A	#N/A	#N/A
													#N/A	#N/A	#N/A
													#N/A	#N/A	#N/A
													#N/A	#N/A	#N/A
													#N/A	#N/A	#N/A
													#N/A	#N/A	#N/A
													#N/A	#N/A	#N/A
													#N/A	#N/A	#N/A
													#N/A	#N/A	#N/A
													#N/A	#N/A	#N/A
													#N/A	#N/A	#N/A
													#N/A	#N/A	#N/A
													#N/A	#N/A	#N/A
													#N/A	#N/A	#N/A
													#N/A	#N/A	#N/A
													#N/A	#N/A	#N/A
													#N/A	#N/A	#N/A
													#N/A	#N/A	#N/A
													#N/A	#N/A	#N/A
													#N/A	#N/A	#N/A
													#N/A	#N/A	#N/A
													#N/A	#N/A	#N/A
													#N/A	#N/A	#N/A
													#N/A	#N/A	#N/A
													#N/A	#N/A	#N/A
													#N/A	#N/A	#N/A
													#N/A	#N/A	#N/A
													#N/A	#N/A	#N/A
													#N/A	#N/A	#N/A
													#N/A	#N/A	#N/A
													#N/A	#N/A	#N/A
													#N/A	#N/A	#N/A
													#N/A	#N/A	#N/A
													#N/A	#N/A	#N/A
													#N/A	#N/A	#N/A
													#N/A	#N/A	#N/A
													#N/A	#N/A	#N/A
													#N/A	#N/A	#N/A
													#N/A	#N/A	#N/A
													#N/A	#N/A	#N/A
													#N/A	#N/A	#N/A
													#N/A	#N/A	#N/A
													#N/A	#N/A	#N/A
													#N/A	#N/A	#N/A
													#N/A	#N/A	#N/A
													#N/A	#N/A	#N/A
													#N/A	#N/A	#N/A
													#N/A	#N/A	#N/A
													#N/A	#N/A	#N/A
													#N/A	#N/A	#N/A
													#N/A	#N/A	#N/A
													#N/A	#N/A	#N/A
													#N/A	#N/A	#N/A
													#N/A	#N/A	#N/A
													#N/A	#N/A	#N/A
													#N/A	#N/A	#N/A
													#N/A	#N/A	#N/A
													#N/A	#N/A	#N/A
													#N/A	#N/A	#N/A
													#N/A	#N/A	#N/A
													#N/A	#N/A	#N/A
													#N/A	#N/A	#N/A
													#N/A	#N/A	#N/A
													#N/A	#N/A	#N/A
													#N/A	#N/A	#N/A
													#N/A	#N/A	#N/A
													#N/A	#N/A	#N/A
													#N/A	#N/A	#N/A
													#N/A	#N/A	#N/A
													#N/A	#N/A	#N/A
													#N/A	#N/A	#N/A
													#N/A	#N/A	#N/A
													#N/A	#N/A	#N/A
													#N/A	#N/A	#N/A
													#N/A	#N/A	#N/A
													#N/A	#N/A	#N/A
													#N/A	#N/A	#N/A
													#N/A	#N/A	#N/A
													#N/A	#N/A	#N/A
													#N/A	#N/A	#N/A
													#N/A	#N/A	#N/A
													#N/A	#N/A	#N/A
													#N/A	#N/A	#N/A
													#N/A	#N/A	#N/A
													#N/A	#N/A	#N/A
													#N/A	#N/A	#N/A
													#N/A	#N/A	#N/A
													#N/A	#N/A	#N/A
													#N/A	#N/A	#N/A
													#N/A	#N/A	#N/A
													#N/A	#N/A	#N/A
													#N/A	#N/A	#N/A
													#N/A	#N/A	#N/A
													#N/A	#N/A	#N/A
													#N/A	#N/A	#N/A
													#N/A	#N/A	#N/A
													#N/A	#N/A	#N/A
													#N/A	#N/A	#N/A
													#N/A	#N/A	#N/A
													#N/A	#N/A	#N/A
													#N/A	#N/A	#N/A
													#N/A	#N/A	#N/A
													#N/A	#N/A	#N/A
													#N/A	#N/A	#N/A
													#N/A	#N/A	#N/A
													#N/A	#N/A	#N/A
													#N/A	#N/A	#N/A
													#N/A	#N/A	#N/A
													#N/A	#N/A	#N/A
													#N/A	#N/A	#N/A
													#N/A	#N/A	#N/A
													#N/A	#N/A	#N/A
													#N/A	#N/A	#N/A
													#N/A	#N/A	#N/A
													#N/A	#N/A	#N/A
													#N/A	#N/A	#N/A
													#N/A	#N/A	#N/A
													#N/A	#N/A	#N/A
													#N/A	#N/A	#N/A
													#N/A	#N/A	#N/A
													#N/A	#N/A	#N/A
													#N/A	#N/A	#N/A
													#N/A	#N/A	#N/A
													#N/A	#N/A	#N/A
													#N/A	#N/A	#N/A
													#N/A	#N/A	#N/A
													#N/A	#N/A	#N/A
													#N/A	#N/A	#N/A
													#N/A	#N/A	#N/A
													#N/A	#N/A	#N/A
													#N/A	#N/A	#N/A
													#N/A	#N/A	#N/A
													#N/A	#N/A	#N/A
													#N/A	#N/A	#N/A
													#N/A	#N/A	#N/A
													#N/A	#N/A	#N/A
													#N/A	#N/A	#N/A
													#N/A	#N/A	#N/A
													#N/A	#N/A	#N/A
													#N/A	#N/A	#N/A
													#N/A	#N/A	#N/A
													#N/A	#N/A	#N/A
													#N/A	#N/A	#N/A
													#N/A	#N/A	#N/A
													#N/A	#N/A	#N/A
													#N/A	#N/A	#N/A
													#N/A	#N/A	#N/A
													#N/A	#N/A	#N/A
													#N/A	#N/A	#N/A
													#N/A	#N/A	#N/A
													#N/A	#N/A	#N/A
													#N/A	#N/A	#N/A
													#N/A	#N/A	#N/A
													#N/A	#N/A	#N/A
													#N/A	#N/A	#N/A
													#N/A	#N/A	#N/A
													#N/A	#N/A	#N/A
													#N/A	#N/A	#N/A
													#N/A	#N/A	#N/A
													#N/A	#N/A	#N/A
													#N/A	#N/A	#N/A
													#N/A	#N/A	#N/A
													#N/A	#N/A	#N/A
													#N/A	#N/A	#N/A
													#N/A	#N/A	#N/A
													#N/A	#N/A	#N/A
													#N/A	#N/A	#N/A
													#N/A	#N/A	#N/A
													#N/A	#N/A	#N/A
													#N/A	#N/A	#N/A
													#N/A	#N/A	#N/A
													#N/A	#N/A	#N/A
													#N/A	#N/A	#N/A
													#N/A	#N/A	#N/A
													#N/A	#N/A	#N/A
													#N/A	#N/A	#N/A
													#N/A	#N/A	#N/A
													#N/A	#N/A	#N/A
													#N/A	#N/A	#N/A
													#N/A	#N/A	#N/A
													#N/A	#N/A	#N/A
													#N/A	#N/A	#N/A
													#N/A	#N/A	#N/A
													#N/A	#N/A	#N/A
													#N/A	#N/A	#N/A
													#N/A	#N/A	#N/A
													#N/A	#N/A	#N/A
													#N/A	#N/A	#N/A
													#N/A	#N/A	#N/A
													#N/A	#N/A	#N/A
													#N/A	#N/A	#N/A
													#N/A	#N/A	#N/A
													#N/A	#N/A	#N/A
													#N/A	#N/A	#N/A
													#N/A	#N/A	#N/A
													#N/A	#N/A	#N/A
													#N/A	#N/A	#N/A
													#N/A	#N/A	#N/A
													#N/A	#N/A	#N/A
													#N/A	#N/A	#N/A
													#N/A	#N/A	#N/A
													#N/A	#N/A	#N/A
													#N/A	#N/A	#N/A
													#N/A	#N/A	#N/A
													#N/A	#N/A	#N/A
													#N/A	#N/A	#N/A
													#N/A	#N/A	#N/A
													#N/A	#N/A	#N/A
													#N/A	#N/A	#N/A
													#N/A	#N/A	#N/A
													#N/A	#N/A	#N/A
													#N/A	#N/A	#N/A
													#N/A	#N/A	#N/A
													#N/A	#N/A	#N/A
													#N/A	#N/A	#N/A
													#N/A	#N/A	#N/A
													#N/A	#N/A	#N/A
													#N/A	#N/A	#N/A
													#N/A	#N/A	#N/A
													#N/A	#N/A	#N/A
													#N/A	#N/A	#N/A
													#N/A	#N/A	#N/A
													#N/A	#N/A	#N/A
													#N/A	#N/A	#N/A
													#N/A	#N/A	#N/A
													#N/A	#N/A	#N/A
													#N/A	#N/A	#N/A
													#N/A	#N/A	#N/A
													#N/A	#N/A	#N/A
													#N/A	#N/A	#N/A
													#N/A	#N/A	#N/A
													#N/A	#N/A	#N/A
													#N/A	#N/A	#N/A
													#N/A	#N/A	#N/A
													#N/A	#N/A	#N/A
													#N/A	#N/A	#N/A
													#N/A	#N/A	#N/A
													#N/A	#N/A	#N/A
													#N/A	#N/A	#N/A
													#N/A	#N/A	#N/A
													#N/A	#N/A	#N/A
													#N/A	#N/A	#N/A
													#N/A	#N/A	#N/A
													#N/A	#N/A	#N/A
													#N/A	#N/A	#N/A
													#N/A	#N/A	#N/A
													#N/A	#N/A	#N/A
													#N/A	#N/A	#N/A
													#N/A	#N/A	#N/A
													#N/A	#N/A	#N/A
													#N/A	#N/A	#N/A
													#N/A	#N/A	#N/A
													#N/A	#N/A	#N/A
													#N/A	#N/A	#N/A
													#N/A	#N/A	#N/A
													#N/A	#N/A	#N/A
													#N/A	#N/A	#N/A
													#N/A	#N/A	#N/A
													#N/A	#N/A	#N/A
													#N/A	#N/A	#N/A
													#N/A	#N/A	#N/A
													#N/A	#N/A	#N/A
													#N/A	#N/A	#N/A
													#N/A	#N/A	#N/A
													#N/A	#N/A	#N/A
													#N/A	#N/A	#N/A
													#N/A	#N/A	#N/A
													#N/A	#N/A	#N/A
													#N/A	#N/A	#N/A
													#N/A	#N/A	#N/A
													#N/A	#N/A	#N/A
													#N/A	#N/A	#N/A
													#N/A	#N/A	#N/A
													#N/A	#N/A	#N/A
													#N/A	#N/A	#N/A
													#N/A	#N/A	#N/A
													#N/A	#N/A	#N/A
													#N/A	#N/A	#N/A
													#N/A	#N/A	#N/A
													#N/A	#N/A	#N/A
													#N/A	#N/A	#N/A
													#N/A	#N/A	#N/A
													#N/A	#N/A	#N/A
													#N/A	#N/A	#N/A
													#N/A	#N/A	#N/A
													#N/A	#N/A	#N/A
													#N/A	#N/A	#N/A
													#N/A	#N/A	#N/A
													#N/A	#N/A	#N/A
													#N/A	#N/A	#N/A
													#N/A	#N/A	#N/A
													#N/A	#N/A	#N/A
													#N/A	#N/A	#N/A
													#N/A	#N/A	#N/A
													#N/A	#N/A	#N/A
													#N/A	#N/A	#N/A
													#N/A	#N/A	#N/A
													#N/A	#N/A	#N/A
													#N/A	#N/A	#N/A
													#N/A	#N/A	#N/A
													#N/A	#N/A	#N/A
													#N/A	#N/A	#N/A
													#N/A	#N/A	#N/A
													#N/A	#N/A	#N/A
													#N/A	#N/A	#N/A
													#N/A	#N/A	#N/A
													#N/A	#N/A	#N/A
													#N/A	#N/A	#N/A
													#N/A	#N/A	#N/A
													#N/A	#N/A	#N/A
													#N/A	#N/A	#N/A
													#N/A	#N/A	#N/A
													#N/A	#N/A	#N/A
													#N/A	#N/A	#N/A
													#N/A	#N/A	#N/A
													#N/A	#N/A	#N/A
													#N/A	#N/A	#N/A
													#N/A	#N/A	#N/A
													#N/A	#N/A	#N/A
													#N/A	#N/A	#N/A
													#N/A	#N/A	#N/A
													#N/A	#N/A	#N/A
													#N/A	#N/A	#N/A
													#N/A	#N/A	#N/A
													#N/A	#N/A	#N/A
													#N/A	#N/A	#N/A
													#N/A	#N/A	#N/A
													#N/A	#N/A	#N/A
													#N/A	#N/A	#N/A
													#N/A	#N/A	#N/A
													#N/A	#N/A	#N/A
													#N/A	#N/A	#N/A
													#N/A	#N/A	#N/A
													#N/A	#N/A	#N/A
													#N/A	#N/A	#N/A
													#N/A	#N/A	#N/A
													#N/A	#N/A	#N/A
													#N/A	#N/A	#N/A
													#N/A	#N/A	#N/A
													#N/A	#N/A	#N/A
													#N/A	#N/A	#N/A
													#N/A	#N/A	#N/A
													#N/A	#N/A	#N/A
													#N/A	#N/A	#N/A
													#N/A	#N/A	#N/A
													#N/A	#N/A	#N/A
													#N/A	#N/A	#N/A
													#N/A	#N/A	#N/A
													#N/A	#N/A	#N/A
													#N/A	#N/A	#N/A
													#N/A	#N/A	#N/A
													#N/A	#N/A	#N/A
													#N/A	#N/A	#N/A
													#N/A	#N/A	#N/A
													#N/A	#N/A	#N/A
													#N/A	#N/A	#N/A
													#N/A	#N/A	#N/A
													#N/A	#N/A	#N/A
													#N/A	#N/A	#N/A
													#N/A	#N/A	#N/A
													#N/A	#N/A	#N/A
													#N/A	#N/A	#N/A
													#N/A	#N/A	#N/A
													#N/A	#N/A	#N/A
													#N/A	#N/A	#N/A
													#N/A	#N/A	#N/A
													#N/A	#N/A	#N/A
													#N/A	#N/A	#N/A
													#N/A	#N/A	#N/A
													#N/A	#N/A	#N/A
													#N/A	#N/A	#N/A
													#N/A	#N/A	#N/A
													#N/A	#N/A	#N/A
													#N/A	#N/A	#N/A
													#N/A	#N/A	#N/A
													#N/A	#N/A	#N/A
													#N/A	#N/A	#N/A
													#N/A	#N/A	#N/A
													#N/A	#N/A	#N/A
													#N/A	#N/A	#N/A
													#N/A	#N/A	#N/A
													#N/A	#N/A	#N/A
													#N/A	#N/A	#N/A
													#N/A	#N/A	#N/A
													#N/A	#N/A	#N/A
													#N/A	#N/A	#N/A
													#N/A	#N/A	#N/A
													#N/A	#N/A	#N/A
													#N/A	#N/A	#N/A
													#N/A	#N/A	#N/A
													#N/A	#N/A	#N/A
													#N/A	#N/A	#N/A
													#N/A	#N/A	#N/A
													#N/A	#N/A	#N/A
													#N/A	#N/A	#N/A
													#N/A	#N/A	#N/A
													#N/A	#N/A	#N/A
													#N/A	#N/A	#N/A
													#N/A	#N/A	#N/A
													#N/A	#N/A	#N/A
													#N/A	#N/A	#N/A
													#N/A	#N/A	#N/A
													#N/A	#N/A	#N/A
													#N/A	#N/A	#N/A
													#N/A	#N/A	#N/A
													#N/A	#N/A	#N/A
													#N/A	#N/A	#N/A
													#N/A	#N/A	#N/A
													#N/A	#N/A	#N/A
													#N/A	#N/A	#N/A
													#N/A	#N/A	#N/A
													#N/A	#N/A	#N/A
													#N/A	#N/A	#N/A
													#N/A	#N/A	#N/A
													#N/A	#N/A	#N/A
													#N/A	#N/A	#N/A
													#N/A	#N/A	#N/A
													#N/A	#N/A	#N/A
													#N/A	#N/A	#N/A
													#N/A	#N/A	#N/A
													#N/A	#N/A	#N/A
													#N/A	#N/A	#N/A
													#N/A	#N/A	#N/A
													#N/A	#N/A	#N/A
													#N/A	#N/A	#N/A
													#N/A	#N/A	#N/A
													#N/A	#N/A	#N/A
													#N/A	#N/A	#N/A
													#N/A	#N/A	#N/A
													#N/A	#N/A	#N/A
													#N/A	#N/A	#N/A
													#N/A	#N/A	#N/A
													#N/A	#N/A	#N/A
													#N/A	#N/A	#N/A
													#N/A	#N/A	#N/A
													#N/A	#N/A	#N/A
													#N/A	#N/A	#N/A
													#N/A	#N/A	#N/A
													#N/A	#N/A	#N/A
													#N/A	#N/A	#N/A
													#N/A	#N/A	#N/A
													#N/A	#N/A	#N/A
													#N/A	#N/A	#N/A
													#N/A	#N/A	#N/A
													#N/A	#N/A	#N/A
													#N/A	#N/A	#N/A
													#N/A	#N/A	#N/A
													#N/A	#N/A	#N/A
													#N/A	#N/A	#N/A
													#N/A	#N/A	#N/A
													#N/A	#N/A	#N/A
													#N/A	#N/A	#N/A
													#N/A	#N/A	#N/A
													#N/A	#N/A	#N/A
													#N/A	#N/A	#N/A
													#N/A	#N/A	#N/A
													#N/A	#N/A	#N/A
													#N/A	#N/A	#N/A
													#N/A	#N/A	#N/A
													#N/A	#N/A	#N/A
													#N/A	#N/A	#N/A
													#N/A	#N/A	#N/A
													#N/A	#N/A	#N/A
													#N/A	#N/A	#N/A
													#N/A	#N/A	#N/A
													#N/A	#N/A	#N/A
													#N/A	#N/A	#N/A
													#N/A	#N/A	#N/A
													#N/A	#N/A	#N/A
													#N/A	#N/A	#N/A
													#N/A	#N/A	#N/A
													#N/A	#N/A	#N/A
													#N/A	#N/A	#N/A
													#N/A	#N/A	#N/A
													#N/A	#N/A	#N/A
													#N/A	#N/A	#N/A
													#N/A	#N/A	#N/A
													#N/A	#N/A	#N/A
													#N/A	#N/A	#N/A
													#N/A	#N/A	#N/A
													#N/A	#N/A	#N/A
													#N/A	#N/A	#N/A
													#N/A	#N/A	#N/A
													#N/A	#N/A	#N/A
													#N/A	#N/A	#N/A
													#N/A	#N/A	#N/A
													#N/A	#N/A	#N/A
													#N/A	#N/A	#N/A
													#N/A	#N/A	#N/A
													#N/A	#N/A	#N/A
													#N/A	#N/A	#N/A
													#N/A	#N/A	#N/A
													#N/A	#N/A	#N/A
													#N/A	#N/A	#N/A
													#N/A	#N/A	#N/A
													#N/A	#N/A	#N/A
													#N/A	#N/A	#N/A
													#N/A	#N/A	#N/A
													#N/A	#N/A	#N/A
													#N/A	#N/A	#N/A
													#N/A	#N/A	#N/A
													#N/A	#N/A	#N/A
													#N/A	#N/A	#N/A
													#N/A	#N/A	#N/A
													#N/A	#N/A	#N/A
													#N/A	#N/A	#N/A
													#N/A	#N/A	#N/A
													#N/A	#N/A	#N/A
													#N/A	#N/A	#N/A
													#N/A	#N/A	#N/A
													#N/A	#N/A	#N/A
													#N/A	#N/A	#N/A
													#N/A	#N/A	#N/A
													#N/A	#N/A	#N/A
													#N/A	#N/A	#N/A
													#N/A	#N/A	#N/A
													#N/A	#N/A	#N/A
													#N/A	#N/A	#N/A
													#N/A	#N/A	#N/A
													#N/A	#N/A	#N/A
													#N/A	#N/A	#N/A
													#N/A	#N/A	#N/A
													#N/A	#N/A	#N/A
													#N/A	#N/A	#N/A
													#N/A	#N/A	#N/A
													#N/A	#N/A	#N/A
													#N/A	#N/A	#N/A
													#N/A	#N/A	#N/A
													#N/A	#N/A	#N/A
													#N/A	#N/A	#N/A
													#N/A	#N/A	#N/A
													#N/A	#N/A	#N/A
													#N/A	#N/A	#N/A
													#N/A	#N/A	#N/A
													#N/A	#N/A	#N/A
													#N/A	#N/A	#N/A
													#N/A	#N/A	#N/A
													#N/A	#N/A	#N/A
													#N/A	#N/A	#N/A
													#N/A	#N/A	#N/A
													#N/A	#N/A	#N/A
													#N/A	#N/A	#N/A
													#N/A	#N/A	#N/A
													#N/A	#N/A	#N/A
													#N/A	#N/A	#N/A
													#N/A	#N/A	#N/A
													#N/A	#N/A	#N/A
													#N/A	#N/A	#N/A
													#N/A	#N/A	#N/A
													#N/A	#N/A	#N/A
													#N/A	#N/A	#N/A
													#N/A	#N/A	#N/A
													#N/A	#N/A	#N/A
													#N/A	#N/A	#N/A
													#N/A	#N/A	#N/A
													#N/A	#N/A	#N/A
													#N/A	#N/A	#N/A
													#N/A	#N/A	#N/A
													#N/A	#N/A	#N/A
													#N/A	#N/A	#N/A
													#N/A	#N/A	#N/A
													#N/A	#N/A	#N/A
													#N/A	#N/A	#N/A
													#N/A	#N/A	#N/A
													#N/A	#N/A	#N/A
													#N/A	#N/A	#N/A
													#N/A	#N/A	#N/A
													#N/A	#N/A	#N/A
													#N/A	#N/A	#N/A
													#N/A	#N/A	#N/A
													#N/A	#N/A	#N/A
													#N/A	#N/A	#N/A
													#N/A	#N/A	#N/A
													#N/A	#N/A	#N/A
													#N/A	#N/A	#N/A
													#N/A	#N/A	#N/A
													#N/A	#N/A	#N/A
													#N/A	#N/A	#N/A
													#N/A	#N/A	#N/A
													#N/A	#N/A	#N/A
													#N/A	#N/A	#N/A
													#N/A	#N/A	#N/A
													#N/A	#N/A	#N/A
													#N/A	#N/A	#N/A
													#N/A	#N/A	#N/A
													#N/A	#N/A	#N/A
													#N/A	#N/A	#N/A
													#N/A	#N/A	#N/A
													#N/A	#N/A	#N/A
													#N/A	#N/A	#N/A
													#N/A	#N/A	#N/A
													#N/A	#N/A	#N/A
													#N/A	#N/A	#N/A
													#N/A	#N/A	#N/A
													#N/A	#N/A	#N/A
													#N/A	#N/A	#N/A
													#N/A	#N/A	#N/A
													#N/A	#N/A	#N/A
													#N/A	#N/A	#N/A
													#N/A	#N/A	#N/A
													#N/A	#N/A	#N/A
													#N/A	#N/A	#N/A
													#N/A	#N/A	#N/A
													#N/A	#N/A	#N/A
													#N/A	#N/A	#N/A
													#N/A	#N/A	#N/A
													#N/A	#N/A	#N/A
													#N/A	#N/A	#N/A
													#N/A	#N/A	#N/A
													#N/A	#N/A	#N/A
													#N/A	#N/A	#N/A
													#N/A	#N/A	#N/A
													#N/A	#N/A	#N/A
													#N/A	#N/A	#N/A
													#N/A	#N/A	#N/A
													#N/A	#N/A	#N/A
													#N/A	#N/A	#N/A
													#N/A	#N/A	#N/A
													#N/A	#N/A	#N/A
													#N/A	#N/A	#N/A
													#N/A	#N/A	#N/A
													#N/A	#N/A	#N/A
													#N/A	#N/A	#N/A
													#N/A	#N/A	#N/A
													#N/A	#N/A	#N/A
													#N/A	#N/A	#N/A
													#N/A	#N/A	#N/A
													#N/A	#N/A	#N/A
													#N/A	#N/A	#N/A
													#N/A	#N/A	#N/A
													#N/A	#N/A	#N/A
													#N/A	#N/A	#N/A
													#N/A	#N/A	#N/A
													#N/A	#N/A	#N/A
													#N/A	#N/A	#N/A
													#N/A	#N/A	#N/A
													#N/A	#N/A	#N/A
													#N/A	#N/A	#N/A
													#N/A	#N/A	#N/A
													#N/A	#N/A	#N/A
													#N/A	#N/A	#N/A
													#N/A	#N/A	#N/A
													#N/A	#N/A	#N/A
													#N/A	#N/A	#N/A
													#N/A	#N/A	#N/A
													#N/A	#N/A	#N/A
													#N/A	#N/A	#N/A
													#N/A	#N/A	#N/A
													#N/A	#N/A	#N/A
													#N/A	#N/A	#N/A
													#N/A	#N/A	#N/A
													#N/A	#N/A	#N/A
													#N/A	#N/A	#N/A
													#N/A	#N/A	#N/A
													#N/A	#N/A	#N/A
													#N/A	#N/A	#N/A
													#N/A	#N/A	#N/A
													#N/A	#N/A	#N/A
													#N/A	#N/A	#N/A
													#N/A	#N/A	#N/A
													#N/A	#N/A	#N/A
													#N/A	#N/A	#N/A
													#N/A	#N/A	#N/A
													#N/A	#N/A	#N/A
													#N/A	#N/A	#N/A
													#N/A	#N/A	#N/A
													#N/A	#N/A	#N/A
													#N/A	#N/A	#N/A
													#N/A	#N/A	#N/A
													#N/A	#N/A	#N/A
													#N/A	#N/A	#N/A
													#N/A	#N/A	#N/A
													#N/A	#N/A	#N/A
													#N/A	#N/A	#N/A
													#N/A	#N/A	#N/A
													#N/A	#N/A	#N/A
													#N/A	#N/A	#N/A
													#N/A	#N/A	#N/A
													#N/A	#N/A	#N/A
													#N/A	#N/A	#N/A
													#N/A	#N/A	#N/A
													#N/A	#N/A	#N/A
													#N/A	#N/A	#N/A
													#N/A	#N/A	#N/A
													#N/A	#N/A	#N/A
													#N/A	#N/A	#N/A
													#N/A	#N/A	#N/A
													#N/A	#N/A	#N/A
													#N/A	#N/A	#N/A
													#N/A	#N/A	#N/A
													#N/A	#N/A	#N/A
													#N/A	#N/A	#N/A
													#N/A	#N/A	#N/A
													#N/A	#N/A	#N/A
													#N/A	#N/A	#N/A
													#N/A	#N/A	#N/A
													#N/A	#N/A	#N/A
													#N/A	#N/A	#N/A
													#N/A	#N/A	#N/A
													#N/A	#N/A	#N/A
													#N/A	#N/A	#N/A
													#N/A	#N/A	#N/A
													#N/A	#N/A	#N/A
													#N/A	#N/A	#N/A
													#N/A	#N/A	#N/A
													#N/A	#N/A	#N/A
													#N/A	#N/A	#N/A
													#N/A	#N/A	#N/A
													#N/A	#N/A	#N/A
													#N/A	#N/A	#N/A
													#N/A	#N/A	#N/A
													#N/A	#N/A	#N/A
													#N/A	#N/A	#N/A
													#N/A	#N/A	#N/A
													#N/A	#N/A	#N/A
													#N/A	#N/A	#N/A
													#N/A	#N/A	#N/A
													#N/A	#N/A	#N/A
													#N/A	#N/A	#N/A
													#N/A	#N/A	#N/A
													#N/A	#N/A	#N/A
													#N/A	#N/A	#N/A
													#N/A	#N/A	#N/A
													#N/A	#N/A	#N/A
													#N/A	#N/A	#N/A
													#N/A	#N/A	#N/A
													#N/A	#N/A	#N/A
													#N/A	#N/A	#N/A
													#N/A	#N/A	#N/A
													#N/A	#N/A	#N/A
													#N/A	#N/A	#N/A
													#N/A	#N/A	#N/A
													#N/A	#N/A	#N/A
													#N/A	#N/A	#N/A
													#N/A	#N/A	#N/A
													#N/A	#N/A	#N/A
													#N/A	#N/A	#N/A
													#N/A	#N/A	#N/A
													#N/A	#N/A	#N/A
													#N/A	#N/A	#N/A
													#N/A	#N/A	#N/A
													#N/A	#N/A	#N/A
													#N/A	#N/A	#N/A
													#N/A	#N/A	#N/A
													#N/A	#N/A	#N/A
													#N/A	#N/A	#N/A
													#N/A	#N/A	#N/A
													#N/A	#N/A	#N/A
													#N/A	#N/A	#N/A
													#N/A	#N/A	#N/A
													#N/A	#N/A	#N/A
													#N/A	#N/A	#N/A
													#N/A	#N/A	#N/A
													#N/A	#N/A	#N/A
													#N/A	#N/A	#N/A
													#N/A	#N/A	#N/A
													#N/A	#N/A	#N/A
													#N/A	#N/A	#N/A
													#N/A	#N/A	#N/A
													#N/A	#N/A	#N/A
													#N/A	#N/A	#N/A
													#N/A	#N/A	#N/A
													#N/A	#N/A	#N/A
													#N/A	#N/A	#N/A
													#N/A	#N/A	#N/A
													#N/A	#N/A	#N/A
													#N/A	#N/A	#N/A
													#N/A	#N/A	#N/A
													#N/A	#N/A	#N/A
													#N/A	#N/A	#N/A
													#N/A	#N/A	#N/A
													#N/A	#N/A	#N/A
													#N/A	#N/A	#N/A
													#N/A	#N/A	#N/A
													#N/A	#N/A	#N/A
													#N/A	#N/A	#N/A
													#N/A	#N/A	#N/A
													#N/A	#N/A	#N/A
													#N/A	#N/A	#N/A
													#N/A	#N/A	#N/A
													#N/A	#N/A	#N/A
													#N/A	#N/A	#N/A
													#N/A	#N/A	#N/A
													#N/A	#N/A	#N/A
													#N/A	#N/A	#N/A
													#N/A	#N/A	#N/A
													#N/A	#N/A	#N/A
													#N/A	#N/A	#N/A
													#N/A	#N/A	#N/A
													#N/A	#N/A	#N/A
													#N/A	#N/A	#N/A
													#N/A	#N/A	#N/A
													#N/A	#N/A	#N/A
													#N/A	#N/A	#N/A
													#N/A	#N/A	#N/A
													#N/A	#N/A	#N/A
													#N/A	#N/A	#N/A
													#N/A	#N/A	#N/A
													#N/A	#N/A	#N/A
													#N/A	#N/A	#N/A
													#N/A	#N/A	#N/A
													#N/A	#N/A	#N/A
													#N/A	#N/A	#N/A
													#N/A	#N/A	#N/A
													#N/A	#N/A	#N/A
													#N/A	#N/A	#N/A
													#N/A	#N/A	#N/A
													#N/A	#N/A	#N/A
													#N/A	#N/A	#N/A
													#N/A	#N/A	#N/A
													#N/A	#N/A	#N/A
													#N/A	#N/A	#N/A
													#N/A	#N/A	#N/A
													#N/A	#N/A	#N/A
													#N/A	#N/A	#N/A
													#N/A	#N/A	#N/A
													#N/A	#N/A	#N/A
													#N/A	#N/A	#N/A
													#N/A	#N/A	#N/A
													#N/A	#N/A	#N/A
													#N/A	#N/A	#N/A
													#N/A	#N/A	#N/A
													#N/A	#N/A	#N/A
													#N/A	#N/A	#N/A
													#N/A	#N/A	#N/A
													#N/A	#N/A	#N/A
													#N/A	#N/A	#N/A
													#N/A	#N/A	#N/A
													#N/A	#N/A	#N/A
													#N/A	#N/A	#N/A
													#N/A	#N/A	#N/A
													#N/A	#N/A	#N/A
													#N/A	#N/A	#N/A
													#N/A	#N/A	#N/A
													#N/A	#N/A	#N/A
													#N/A	#N/A	#N/A
													#N/A	#N/A	#N/A
													#N/A	#N/A	#N/A
													#N/A	#N/A	#N/A
													#N/A	#N/A	#N/A
													#N/A	#N/A	#N/A
													#N/A	#N/A	#N/A
													#N/A	#N/A	#N/A
													#N/A	#N/A	#N/A
													#N/A	#N/A	#N/A
													#N/A	#N/A	#N/A
													#N/A	#N/A	#N/A
													#N/A	#N/A	#N/A
													#N/A	#N/A	#N/A
													#N/A	#N/A	#N/A
													#N/A	#N/A	#N/A
													#N/A	#N/A	#N/A
													#N/A	#N/A	#N/A
													#N/A	#N/A	#N/A
													#N/A	#N/A	#N/A
													#N/A	#N/A	#N/A
													#N/A	#N/A	#N/A
													#N/A	#N/A	#N/A
													#N/A	#N/A	#N/A
													#N/A	#N/A	#N/A
													#N/A	#N/A	#N/A
													#N/A	#N/A	#N/A
													#N/A	#N/A	#N/A
													#N/A	#N/A	#N/A
													#N/A	#N/A	#N/A
													#N/A	#N/A	#N/A
													#N/A	#N/A	#N/A
													#N/A	#N/A	#N/A
													#N/A	#N/A	#N/A
													#N/A	#N/A	#N/A
													#N/A	#N/A	#N/A
													#N/A	#N/A	#N/A
													#N/A	#N/A	#N/A
													#N/A	#N/A	#N/A
													#N/A	#N/A	#N/A
													#N/A	#N/A	#N/A
													#N/A	#N/A	#N/A
													#N/A	#N/A	#N/A
													#N/A	#N/A	#N/A
													#N/A	#N/A	#N/A
													#N/A	#N/A	#N/A
													#N/A	#N/A	#N/A
													#N/A	#N/A	#N/A
													#N/A	#N/A	#N/A
													#N/A	#N/A	#N/A
													#N/A	#N/A	#N/A
													#N/A	#N/A	#N/A
													#N/A	#N/A	#N/A
													#N/A	#N/A	#N/A
													#N/A	#N/A	#N/A
													#N/A	#N/A	#N/A
													#N/A	#N/A	#N/A
													#N/A	#N/A	#N/A
													#N/A	#N/A	#N/A
													#N/A	#N/A	#N/A
													#N/A	#N/A	#N/A
													#N/A	#N/A	#N/A
													#N/A	#N/A	#N/A
													#N/A	#N/A	#N/A
													#N/A	#N/A	#N/A
													#N/A	#N/A	#N/A
													#N/A	#N/A	#N/A
													#N/A	#N/A	#N/A
													#N/A	#N/A	#N/A
													#N/A	#N/A	#N/A
													#N/A	#N/A	#N/A
													#N/A	#N/A	#N/A
													#N/A	#N/A	#N/A
													#N/A	#N/A	#N/A
													#N/A	#N/A	#N/A
													#N/A	#N/A	#N/A
													#N/A	#N/A	#N/A
													#N/A	#N/A	#N/A
													#N/A	#N/A	#N/A
													#N/A	#N/A	#N/A
													#N/A	#N/A	#N/A
													#N/A	#N/A	#N/A
													#N/A	#N/A	#N/A
													#N/A	#N/A	#N/A
													#N/A	#N/A	#N/A
													#N/A	#N/A	#N/A
													#N/A	#N/A	#N/A
													#N/A	#N/A	#N/A
													#N/A	#N/A	#N/A
													#N/A	#N/A	#N/A
													#N/A	#N/A	#N/A
													#N/A	#N/A	#N/A
													#N/A	#N/A	#N/A
													#N/A	#N/A	#N/A
													#N/A	#N/A	#N/A
													#N/A	#N/A	#N/A
													#N/A	#N/A	#N/A
													#N/A	#N/A	#N/A
													#N/A	#N/A	#N/A
													#N/A	#N/A	#N/A
													#N/A	#N/A	#N/A
													#N/A	#N/A	#N/A
													#N/A	#N/A	#N/A
													#N/A	#N/A	#N/A
													#N/A	#N/A	#N/A
													#N/A	#N/A	#N/A
													#N/A	#N/A	#N/A
													#N/A	#N/A	#N/A
													#N/A	#N/A	#N/A
													#N/A	#N/A	#N/A
													#N/A	#N/A	#N/A
													#N/A	#N/A	#N/A
													#N/A	#N/A	#N/A
													#N/A	#N/A	#N/A
													#N/A	#N/A	#N/A
													#N/A	#N/A	#N/A
													#N/A	#N/A	#N/A
													#N/A	#N/A	#N/A
													#N/A	#N/A	#N/A
													#N/A	#N/A	#N/A
													#N/A	#N/A	#N/A
													#N/A	#N/A	#N/A
													#N/A	#N/A	#N/A
													#N/A	#N/A	#N/A
													#N/A	#N/A	#N/A
													#N/A	#N/A	#N/A
													#N/A	#N/A	#N/A
													#N/A	#N/A	#N/A
													#N/A	#N/A	#N/A
													#N/A	#N/A	#N/A
													#N/A	#N/A	#N/A
													#N/A	#N/A	#N/A
													#N/A	#N/A	#N/A
													#N/A	#N/A	#N/A
													#N/A	#N/A	#N/A
													#N/A	#N/A	#N/A
													#N/A	#N/A	#N/A
													#N/A	#N/A	#N/A
													#N/A	#N/A	#N/A
													#N/A	#N/A	#N/A
													#N/A	#N/A	#N/A
													#N/A	#N/A	#N/A
													#N/A	#N/A	#N/A
													#N/A	#N/A	#N/A
													#N/A	#N/A	#N/A
													#N/A	#N/A	#N/A
													#N/A	#N/A	#N/A
													#N/A	#N/A	#N/A
													#N/A	#N/A	#N/A
													#N/A	#N/A	#N/A
													#N/A	#N/A	#N/A
													#N/A	#N/A	#N/A
													#N/A	#N/A	#N/A
													#N/A	#N/A	#N/A
													#N/A	#N/A	#N/A
													#N/A	#N/A	#N/A
													#N/A	#N/A	#N/A
													#N/A	#N/A	#N/A
													#N/A	#N/A	#N/A
													#N/A	#N/A	#N/A
													#N/A	#N/A	#N/A
													#N/A	#N/A	#N/A
													#N/A	#N/A	#N/A
													#N/A	#N/A	#N/A
													#N/A	#N/A	#N/A
													#N/A	#N/A	#N/A
													#N/A	#N/A	#N/A
													#N/A	#N/A	#N/A
													#N/A	#N/A	#N/A
													#N/A	#N/A	#N/A
													#N/A	#N/A	#N/A
													#N/A	#N/A	#N/A
													#N/A	#N/A	#N/A
													#N/A	#N/A	#N/A
													#N/A	#N/A	#N/A
													#N/A	#N/A	#N/A
													#N/A	#N/A	#N/A
													#N/A	#N/A	#N/A
													#N/A	#N/A	#N/A
													#N/A	#N/A	#N/A
													#N/A	#N/A	#N/A
													#N/A	#N/A	#N/A
													#N/A	#N/A	#N/A
													#N/A	#N/A	#N/A
													#N/A	#N/A	#N/A
													#N/A	#N/A	#N/A
													#N/A	#N/A	#N/A
													#N/A	#N/A	#N/A
													#N/A	#N/A	#N/A
													#N/A	#N/A	#N/A
													#N/A	#N/A	#N/A
													#N/A	#N/A	#N/A
													#N/A	#N/A	#N/A
													#N/A	#N/A	#N/A
													#N/A	#N/A	#N/A
													#N/A	#N/A	#N/A
													#N/A	#N/A	#N/A
													#N/A	#N/A	#N/A
													#N/A	#N/A	#N/A
													#N/A	#N/A	#N/A
													#N/A	#N/A	#N/A
													#N/A	#N/A	#N/A
													#N/A	#N/A	#N/A
													#N/A	#N/A	#N/A
													#N/A	#N/A	#N/A
													#N/A	#N/A	#N/A
													#N/A	#N/A	#N/A
													#N/A	#N/A	#N/A
													#N/A	#N/A	#N/A
													#N/A	#N/A	#N/A
													#N/A	#N/A	#N/A
													#N/A	#N/A	#N/A
													#N/A	#N/A	#N/A
													#N/A	#N/A	#N/A
													#N/A	#N/A	#N/A
													#N/A	#N/A	#N/A
													#N/A	#N/A	#N/A
													#N/A	#N/A	#N/A
													#N/A	#N/A	#N/A
													#N/A	#N/A	#N/A
													#N/A	#N/A	#N/A
													#N/A	#N/A	#N/A
													#N/A	#N/A	#N/A
													#N/A	#N/A	#N/A
													#N/A	#N/A	#N/A
													#N/A	#N/A	#N/A
													#N/A	#N/A	#N/A
													#N/A	#N/A	#N/A
													#N/A	#N/A	#N/A
													#N/A	#N/A	#N/A
													#N/A	#N/A	#N/A
													#N/A	#N/A	#N/A
													#N/A	#N/A	#N/A
													#N/A	#N/A	#N/A
													#N/A	#N/A	#N/A
													#N/A	#N/A	#N/A
													#N/A	#N/A	#N/A
													#N/A	#N/A	#N/A
													#N/A	#N/A	#N/A
													#N/A	#N/A	#N/A
													#N/A	#N/A	#N/A
													#N/A	#N/A	#N/A
													#N/A	#N/A	#N/A
													#N/A	#N/A	#N/A
													#N/A	#N/A	#N/A
													#N/A	#N/A	#N/A
													#N/A	#N/A	#N/A
													#N/A	#N/A	#N/A
													#N/A	#N/A	#N/A
													#N/A	#N/A	#N/A
													#N/A	#N/A	#N/A
													#N/A	#N/A	#N/A
													#N/A	#N/A	#N/A
													#N/A	#N/A	#N/A
													#N/A	#N/A	#N/A
													#N/A	#N/A	#N/A
													#N/A	#N/A	#N/A
													#N/A	#N/A	#N/A
													#N/A	#N/A	#N/A
													#N/A	#N/A	#N/A
													#N/A	#N/A	#N/A
													#N/A	#N/A	#N/A
													#N/A	#N/A	#N/A
													#N/A	#N/A	#N/A
													#N/A	#N/A	#N/A
													#N/A	#N/A	#N/A
													#N/A	#N/A	#N/A
													#N/A	#N/A	#N/A
													#N/A	#N/A	#N/A
													#N/A	#N/A	#N/A
													#N/A	#N/A	#N/A
													#N/A	#N/A	#N/A
													#N/A	#N/A	#N/A
													#N/A	#N/A	#N/A
													#N/A	#N/A	#N/A
													#N/A	#N/A	#N/A
													#N/A	#N/A	#N/A
													#N/A	#N/A	#N/A
													#N/A	#N/A	#N/A
													#N/A	#N/A	#N/A
													#N/A	#N/A	#N/A
													#N/A	#N/A	#N/A
													#N/A	#N/A	#N/A
													#N/A	#N/A	#N/A
													#N/A	#N/A	#N/A
													#N/A	#N/A	#N/A
													#N/A	#N/A	#N/A
													#N/A	#N/A	#N/A
													#N/A	#N/A	#N/A
													#N/A	#N/A	#N/A
													#N/A	#N/A	#N/A
													#N/A	#N/A	#N/A
													#N/A	#N/A	#N/A
													#N/A	#N/A	#N/A
													#N/A	#N/A	#N/A
													#N/A	#N/A	#N/A
													#N/A	#N/A	#N/A
													#N/A	#N/A	#N/A
													#N/A	#N/A	#N/A
													#N/A	#N/A	#N/A
													#N/A	#N/A	#N/A
													#N/A	#N/A	#N/A
													#N/A	#N/A	#N/A
													#N/A	#N/A	#N/A
													#N/A	#N/A	#N/A
													#N/A	#N/A	#N/A
													#N/A	#N/A	#N/A
													#N/A	#N/A	#N/A
													#N/A	#N/A	#N/A
													#N/A	#N/A	#N/A
													#N/A	#N/A	#N/A
													#N/A	#N/A	#N/A
													#N/A	#N/A	#N/A
													#N/A	#N/A	#N/A
													#N/A	#N/A	#N/A
													#N/A	#N/A	#N/A
													#N/A	#N/A	#N/A
													#N/A	#N/A	#N/A
													#N/A	#N/A	#N/A
													#N/A	#N/A	#N/A
													#N/A	#N/A	#N/A
													#N/A	#N/A	#N/A
													#N/A	#N/A	#N/A
													#N/A	#N/A	#N/A
													#N/A	#N/A	#N/A
													#N/A	#N/A	#N/A
													#N/A	#N/A	#N/A
													#N/A	#N/A	#N/A
													#N/A	#N/A	#N/A
													#N/A	#N/A	#N/A
													#N/A	#N/A	#N/A
													#N/A	#N/A	#N/A
													#N/A	#N/A	#N/A
													#N/A	#N/A	#N/A
													#N/A	#N/A	#N/A
													#N/A	#N/A	#N/A
													#N/A	#N/A	#N/A
													#N/A	#N/A	#N/A
													#N/A	#N/A	#N/A
													#N/A	#N/A	#N/A
													#N/A	#N/A	#N/A
													#N/A	#N/A	#N/A
													#N/A	#N/A	#N/A
													#N/A	#N/A	#N/A
													#N/A	#N/A	#N/A
													#N/A	#N/A	#N/A
													#N/A	#N/A	#N/A
													#N/A	#N/A	#N/A
													#N/A	#N/A	#N/A
													#N/A	#N/A	#N/A
													#N/A	#N/A	#N/A
													#N/A	#N/A	#N/A
													#N/A	#N/A	#N/A
													#N/A	#N/A	#N/A
													#N/A	#N/A	#N/A
													#N/A	#N/A	#N/A
													#N/A	#N/A	#N/A
													#N/A	#N/A	#N/A
													#N/A	#N/A	#N/A
													#N/A	#N/A	#N/A
													#N/A	#N/A	#N/A
													#N/A	#N/A	#N/A
													#N/A	#N/A	#N/A
													#N/A	#N/A	#N/A
													#N/A	#N/A	#N/A
													#N/A	#N/A	#N/A
													#N/A	#N/A	#N/A
													#N/A	#N/A	#N/A
													#N/A	#N/A	#N/A
													#N/A	#N/A	#N/A
													#N/A	#N/A	#N/A
													#N/A	#N/A	#N/A
													#N/A	#N/A	#N/A
													#N/A	#N/A	#N/A
													#N/A	#N/A	#N/A
													#N/A	#N/A	#N/A
													#N/A	#N/A	#N/A
													#N/A	#N/A	#N/A
													#N/A	#N/A	#N/A
													#N/A	#N/A	#N/A
													#N/A	#N/A	#N/A
													#N/A	#N/A	#N/A
													#N/A	#N/A	#N/A
													#N/A	#N/A	#N/A
													#N/A	#N/A	#N/A
													#N/A	#N/A	#N/A
													#N/A	#N/A	#N/A
													#N/A	#N/A	#N/A
													#N/A	#N/A	#N/A
													#N/A	#N/A	#N/A
													#N/A	#N/A	#N/A
													#N/A	#N/A	#N/A
													#N/A	#N/A	#N/A
													#N/A	#N/A	#N/A
													#N/A	#N/A	#N/A
													#N/A	#N/A	#N/A
													#N/A	#N/A	#N/A
													#N/A	#N/A	#N/A
													#N/A	#N/A	#N/A
													#N/A	#N/A	#N/A
													#N/A	#N/A	#N/A
													#N/A	#N/A	#N/A
													#N/A	#N/A	#N/A
													#N/A	#N/A	#N/A
													#N/A	#N/A	#N/A
													#N/A	#N/A	#N/A
													#N/A	#N/A	#N/A
													#N/A	#N/A	#N/A
													#N/A	#N/A	#N/A
													#N/A	#N/A	#N/A
													#N/A	#N/A	#N/A
													#N/A	#N/A	#N/A
													#N/A	#N/A	#N/A
													#N/A	#N/A	#N/A
													#N/A	#N/A	#N/A
													#N/A	#N/A	#N/A
													#N/A	#N/A	#N/A
													#N/A	#N/A	#N/A
													#N/A	#N/A	#N/A
													#N/A	#N/A	#N/A
													#N/A	#N/A	#N/A
													#N/A	#N/A	#N/A
													#N/A	#N/A	#N/A
													#N/A	#N/A	#N/A
													#N/A	#N/A	#N/A
													#N/A	#N/A	#N/A
													#N/A	#N/A	#N/A
													#N/A	#N/A	#N/A
													#N/A	#N/A	#N/A
													#N/A	#N/A	#N/A
													#N/A	#N/A	#N/A
													#N/A	#N/A	#N/A
													#N/A	#N/A	#N/A
													#N/A	#N/A	#N/A
													#N/A	#N/A	#N/A
													#N/A	#N/A	#N/A
													#N/A	#N/A	#N/A
													#N/A	#N/A	#N/A
													#N/A	#N/A	#N/A
													#N/A	#N/A	#N/A
													#N/A	#N/A	#N/A
													#N/A	#N/A	#N/A
													#N/A	#N/A	#N/A
													#N/A	#N/A	#N/A
													#N/A	#N/A	#N/A
													#N/A	#N/A	#N/A
													#N/A	#N/A	#N/A
													#N/A	#N/A	#N/A
													#N/A	#N/A	#N/A
													#N/A	#N/A	#N/A
													#N/A	#N/A	#N/A
													#N/A	#N/A	#N/A
													#N/A	#N/A	#N/A
													#N/A	#N/A	#N/A
													#N/A	#N/A	#N/A
													#N/A	#N/A	#N/A
													#N/A	#N/A	#N/A
													#N/A	#N/A	#N/A
													#N/A	#N/A	#N/A
													#N/A	#N/A	#N/A
													#N/A	#N/A	#N/A
													#N/A	#N/A	#N/A
													#N/A	#N/A	#N/A
													#N/A	#N/A	#N/A
													#N/A	#N/A	#N/A
													#N/A	#N/A	#N/A
													#N/A	#N/A	#N/A
													#N/A	#N/A	#N/A
													#N/A	#N/A	#N/A
													#N/A	#N/A	#N/A
													#N/A	#N/A	#N/A
													#N/A	#N/A	#N/A
													#N/A	#N/A	#N/A
													#N/A	#N/A	#N/A
													#N/A	#N/A	#N/A
													#N/A	#N/A	#N/A
													#N/A	#N/A	#N/A
													#N/A	#N/A	#N/A
													#N/A	#N/A	#N/A
													#N/A	#N/A	#N/A
													#N/A	#N/A	#N/A
													#N/A	#N/A	#N/A
													#N/A	#N/A	#N/A
													#N/A	#N/A	#N/A
													#N/A	#N/A	#N/A
													#N/A	#N/A	#N/A
													#N/A	#N/A	#N/A
													#N/A	#N/A	#N/A
													#N/A	#N/A	#N/A
													#N/A	#N/A	#N/A
													#N/A	#N/A	#N/A
													#N/A	#N/A	#N/A
													#N/A	#N/A	#N/A
													#N/A	#N/A	#N/A
													#N/A	#N/A	#N/A
													#N/A	#N/A	#N/A
													#N/A	#N/A	#N/A
													#N/A	#N/A	#N/A
													#N/A	#N/A	#N/A
													#N/A	#N/A	#N/A
													#N/A	#N/A	#N/A
													#N/A	#N/A	#N/A
													#N/A	#N/A	#N/A
													#N/A	#N/A	#N/A
													#N/A	#N/A	#N/A
													#N/A	#N/A	#N/A
													#N/A	#N/A	#N/A
													#N/A	#N/A	#N/A
													#N/A	#N/A	#N/A
													#N/A	#N/A	#N/A
													#N/A	#N/A	#N/A
													#N/A	#N/A	#N/A
													#N/A	#N/A	#N/A
													#N/A	#N/A	#N/A
													#N/A	#N/A	#N/A
													#N/A	#N/A	#N/A
													#N/A	#N/A	#N/A
													#N/A	#N/A	#N/A
													#N/A	#N/A	#N/A
													#N/A	#N/A	#N/A
													#N/A	#N/A	#N/A
													#N/A	#N/A	#N/A
													#N/A	#N/A	#N/A
													#N/A	#N/A	#N/A
													#N/A	#N/A	#N/A
													#N/A	#N/A	#N/A
													#N/A	#N/A	#N/A
													#N/A	#N/A	#N/A
													#N/A	#N/A	#N/A
													#N/A	#N/A	#N/A
													#N/A	#N/A	#N/A
													#N/A	#N/A	#N/A
													#N/A	#N/A	#N/A
													#N/A	#N/A	#N/A
													#N/A	#N/A	#N/A
													#N/A	#N/A	#N/A
													#N/A	#N/A	#N/A
													#N/A	#N/A	#N/A
													#N/A	#N/A	#N/A
													#N/A	#N/A	#N/A
													#N/A	#N/A	#N/A
													#N/A	#N/A	#N/A
													#N/A	#N/A	#N/A
													#N/A	#N/A	#N/A
													#N/A	#N/A	#N/A
													#N/A	#N/A	#N/A
													#N/A	#N/A	#N/A
													#N/A	#N/A	#N/A
													#N/A	#N/A	#N/A
													#N/A	#N/A	#N/A
													#N/A	#N/A	#N/A
													#N/A	#N/A	#N/A
													#N/A	#N/A	#N/A
													#N/A	#N/A	#N/A
													#N/A	#N/A	#N/A
													#N/A	#N/A	#N/A
													#N/A	#N/A	#N/A
													#N/A	#N/A	#N/A
													#N/A	#N/A	#N/A
													#N/A	#N/A	#N/A
													#N/A	#N/A	#N/A
													#N/A	#N/A	#N/A
													#N/A	#N/A	#N/A
													#N/A	#N/A	#N/A
													#N/A	#N/A	#N/A
													#N/A	#N/A	#N/A
													#N/A	#N/A	#N/A
													#N/A	#N/A	#N/A
													#N/A	#N/A	#N/A
													#N/A	#N/A	#N/A
													#N/A	#N/A	#N/A
													#N/A	#N/A	#N/A
													#N/A	#N/A	#N/A
													#N/A	#N/A	#N/A
													#N/A	#N/A	#N/A
													#N/A	#N/A	#N/A
													#N/A	#N/A	#N/A
													#N/A	#N/A	#N/A
													#N/A	#N/A	#N/A
													#N/A	#N/A	#N/A
													#N/A	#N/A	#N/A
													#N/A	#N/A	#N/A
													#N/A	#N/A	#N/A
													#N/A	#N/A	#N/A
													#N/A	#N/A	#N/A
													#N/A	#N/A	#N/A
													#N/A	#N/A	#N/A
													#N/A	#N/A	#N/A
													#N/A	#N/A	#N/A
													#N/A	#N/A	#N/A
													#N/A	#N/A	#N/A
													#N/A	#N/A	#N/A
													#N/A	#N/A	#N/A
													#N/A	#N/A	#N/A
													#N/A	#N/A	#N/A
													#N/A	#N/A	#N/A
													#N/A	#N/A	#N/A
													#N/A	#N/A	#N/A
													#N/A	#N/A	#N/A
													#N/A	#N/A	#N/A
													#N/A	#N/A	#N/A
													#N/A	#N/A	#N/A
													#N/A	#N/A	#N/A
													#N/A	#N/A	#N/A
													#N/A	#N/A	#N/A
													#N/A	#N/A	#N/A
													#N/A	#N/A	#N/A
													#N/A	#N/A	#N/A
													#N/A	#N/A	#N/A
													#N/A	#N/A	#N/A
													#N/A	#N/A	#N/A
													#N/A	#N/A	#N/A
													#N/A	#N/A	#N/A
													#N/A	#N/A	#N/A
													#N/A	#N/A	#N/A
													#N/A	#N/A	#N/A
													#N/A	#N/A	#N/A
													#N/A	#N/A	#N/A
													#N/A	#N/A	#N/A
													#N/A	#N/A	#N/A
													#N/A	#N/A	#N/A
													#N/A	#N/A	#N/A
													#N/A	#N/A	#N/A
													#N/A	#N/A	#N/A
													#N/A	#N/A	#N/A
													#N/A	#N/A	#N/A
													#N/A	#N/A	#N/A
													#N/A	#N/A	#N/A
													#N/A	#N/A	#N/A
													#N/A	#N/A	#N/A
													#N/A	#N/A	#N/A
													#N/A	#N/A	#N/A
													#N/A	#N/A	#N/A
													#N/A	#N/A	#N/A
													#N/A	#N/A	#N/A
													#N/A	#N/A	#N/A
													#N/A	#N/A	#N/A
													#N/A	#N/A	#N/A
													#N/A	#N/A	#N/A
													#N/A	#N/A	#N/A
													#N/A	#N/A	#N/A
													#N/A	#N/A	#N/A
													#N/A	#N/A	#N/A
													#N/A	#N/A	#N/A
													#N/A	#N/A	#N/A
													#N/A	#N/A	#N/A
													#N/A	#N/A	#N/A
													#N/A	#N/A	#N/A
													#N/A	#N/A	#N/A
													#N/A	#N/A	#N/A
													#N/A	#N/A	#N/A
													#N/A	#N/A	#N/A
													#N/A	#N/A	#N/A
													#N/A	#N/A	#N/A
													#N/A	#N/A	#N/A
													#N/A	#N/A	#N/A
													#N/A	#N/A	#N/A
													#N/A	#N/A	#N/A
													#N/A	#N/A	#N/A
													#N/A	#N/A	#N/A
													#N/A	#N/A	#N/A
													#N/A	#N/A	#N/A
													#N/A	#N/A	#N/A
													#N/A	#N/A	#N/A
													#N/A	#N/A	#N/A
													#N/A	#N/A	#N/A
													#N/A	#N/A	#N/A
													#N/A	#N/A	#N/A
													#N/A	#N/A	#N/A
													#N/A	#N/A	#N/A
													#N/A	#N/A	#N/A
													#N/A	#N/A	#N/A
													#N/A	#N/A	#N/A
													#N/A	#N/A	#N/A
													#N/A	#N/A	#N/A
													#N/A	#N/A	#N/A
													#N/A	#N/A	#N/A
													#N/A	#N/A	#N/A
													#N/A	#N/A	#N/A
													#N/A	#N/A	#N/A
													#N/A	#N/A	#N/A
[truncated: 1,046,576+ more rows]

## Sheet: Sheet1
	0	1	2	3	4	5	6	7	8	9	10	11	12	13	14	15
0	1	0.98	0.79	0.65	0.54	0.49	0.46	0.37	0.3	0.25	0.23	0.16	0.13	0.09	0.08	0.06
1	—	0.02	0.21	0.31	0.37	0.38	0.39	0.4	0.4	0.38	0.37	0.33	0.3	0.25	0.22	0.19
2	—	—	0	0.04	0.09	0.11	0.13	0.18	0.22	0.25	0.26	0.29	0.3	0.3	0.29	0.28
3	—	—	—	0	0.01	0.01	0.02	0.04	0.07	0.1	0.1	0.15	0.18	0.21	0.23	0.24
4	—	—	—	—	0	0	0	0.01	0.01	0.02	0.03	0.05	0.07	0.1	0.12	0.14
5	—	—	—	—	—	0	0	0	0	0	0	0.01	0.02	0.03	0.04	0.06
6	—	—	—	—	—	—	0	0	0	0	0	0	0	0.01	0.01	0.02
7	—	—	—	—	—	—	—	0	0	0	0	0	0	0	0	0
8	—	—	—	—	—	—	—	—	0	0	0	0	0	0	0	0
9	—	—	—	—	—	—	—	—	—	0	0	0	0	0	0	0
10	—	—	—	—	—	—	—	—	—	—	0	0	0	0	0	0
11	—	—	—	—	—	—	—	—	—	—	—	0	0	0	0	0
12	—	—	—	—	—	—	—	—	—	—	—	—	0	0	0	0
13	—	—	—	—	—	—	—	—	—	—	—	—	—	0	0	0
14	—	—	—	—	—	—	—	—	—	—	—	—	—	—	0	0
15	—	—	—	—	—	—	—	—	—	—	—	—	—	—	—	0
