# Supplementary material for: Probabilistic En Route Sector Traffic Demand Prediction Based upon Statistical Analysis of Error Distribution Characteristics
Source: Hindawi journal article supplement (doi:10.1155/2018/8184513), 2018-08-13
Supplement: f1 [file 8184513.f1.rar › Fig.8 AR02-0700-0714.xlsx]

## Sheet: 0700-0714
CALLSIGN	PASSSECTOR	EINSECTORTIME	EOUTSECTORTIME	OPINSECTORTIME	OPOUTSECTORTIME	ATD	FlyTime	Predicted Time Error ∆ti(in)	Predicted Time Error ∆ti(out)	probability distribution(in)	probability distribution(out)	The probability of the aircraft in AR02	0	0	1
EPA6214	ZGGGAR02	2014-05-03 07:22:02	2014-05-03 07:29:02	2014-05-03 07:12:50	2014-05-03 07:16:59	2014-05-03 05:01:00	1900-01-01 02:11:50	9.2	12.05	0.534382	0.540644	0.245472	1	0	0.754528
EPA6214	ZGGGAR02	2014-05-08 07:10:02	2014-05-08 07:17:02	2014-05-08 07:08:22	2014-05-08 07:12:48	2014-05-08 04:49:00	1900-01-01 02:19:22	1.66667	4.23333	0.301101	0.325661	0.203044	1	1	0.185215
YZR7968	ZGGGAR02	2014-05-10 07:04:46	2014-05-10 07:15:26	2014-05-10 07:13:29	2014-05-10 07:24:09	2014-05-10 04:44:00	1900-01-01 02:29:29	-8.71667	-8.71667	0.0871363	0.0853881	0.0796959	2	0	0.601326
YZR7968	ZGGGAR02	2014-05-11 06:57:46	2014-05-11 07:08:26	2014-05-11 07:08:23	2014-05-11 07:19:03	2014-05-11 04:37:00	1900-01-01 02:31:23	-10.6167	-10.6167	0.0652888	0.066243	0.0609639	2	2	0.0376069
N711SW	ZGGGAR02	2014-05-13 07:25:00	2014-05-13 07:34:00	2014-05-13 07:00:22	2014-05-13 07:04:54	2014-05-12 21:26:00	1900-01-01 09:34:22	24.6333	29.1	0.908391	0.904973	0.0863219	2	1	0.300811
N711SW	ZGGGAR02	2014-05-13 07:25:00	2014-05-13 07:34:00	2014-05-13 07:00:22	2014-05-13 07:04:54	2014-05-12 21:26:00	1900-01-01 09:34:22	24.6333	29.1	0.908391	0.904973	0.0863219	3	0	0.553402
N711SW	ZGGGAR02	2014-05-13 07:25:00	2014-05-13 07:34:00	2014-05-13 07:00:22	2014-05-13 07:04:54	2014-05-12 21:26:00	1900-01-01 09:34:22	24.6333	29.1	0.908391	0.904973	0.0863219	3	3	0.00299712
N711SW	ZGGGAR02	2014-05-13 07:25:00	2014-05-13 07:34:00	2014-05-13 07:00:22	2014-05-13 07:04:54	2014-05-12 21:26:00	1900-01-01 09:34:22	24.6333	29.1	0.908391	0.904973	0.0863219	3	1	0.324761
EPA6214	ZGGGAR02	2014-05-15 07:16:02	2014-05-15 07:23:02	2014-05-15 07:11:01	2014-05-15 07:15:20	2014-05-15 04:55:00	1900-01-01 02:16:01	5.01667	7.7	0.400878	0.418303	0.23319	3	2	0.0585832
EPA6214	ZGGGAR02	2014-05-16 07:08:02	2014-05-16 07:15:02	2014-05-16 07:00:28	2014-05-16 07:04:41	2014-05-16 04:47:00	1900-01-01 02:13:28	7.56667	10.35	0.481882	0.492649	0.244483	4	0	0.519665
YZR7968	ZGGGAR02	2014-05-16 07:10:46	2014-05-16 07:21:26	2014-05-16 07:13:52	2014-05-16 07:24:32	2014-05-16 04:50:00	1900-01-01 02:23:52	-3.1	-3.1	0.182562	0.165612	0.152327	4	4	0.000182716
YZR7968	ZGGGAR02	2014-05-18 07:08:46	2014-05-18 07:19:26	2014-05-18 07:10:27	2014-05-18 07:21:07	2014-05-18 04:48:00	1900-01-01 02:22:27	-1.68333	-1.68333	0.214356	0.191809	0.173241	4	1	0.3387
SIA803	ZGGGAR02	2014-05-24 07:19:11	2014-05-24 07:34:11	2014-05-24 07:11:24	2014-05-24 07:26:24	2014-05-24 05:01:00	1900-01-01 02:10:24	7.78333	7.78333	0.488848	0.420611	0.283233	4	2	0.0748104
								12.4039	14.1122				4	3	0.00638586
													5	0	0.474806
													5	5	1.57724e-05
													5	1	0.354321
													5	2	0.0975898
													5	3	0.0122924
													5	4	0.000718183
													6	0	0.43382
													6	6	1.3615e-06
													6	1	0.364721
													6	2	0.119751
													6	3	0.0196554
													6	4	0.00171729
													6	5	7.64058e-05
													7	0	0.396372
													7	7	1.17527e-07
													7	1	0.370686
													7	2	0.140898
													7	3	0.0282959
													7	4	0.00326575
													7	5	0.00021805
													7	6	7.83947e-06
													8	0	0.362156
													8	8	1.01452e-08
													8	1	0.372903
													8	2	0.160733
													8	3	0.0380159
													8	4	0.0054264
													8	5	0.000481133
													8	6	2.59852e-05
													8	7	7.841e-07
													9	0	0.277705
													9	9	2.36575e-09
													9	1	0.370397
													9	2	0.210209
													9	3	0.0666323
													9	4	0.0130259
													9	5	0.00163432
													9	6	0.000132121
													9	7	6.66074e-06
													9	8	1.90623e-07
													10	0	0.209811
													10	10	5.78387e-10
													10	1	0.347736
													10	2	0.249373
													10	3	0.101734
													10	4	0.0261318
													10	5	0.00441937
													10	6	0.000499383
													10	7	3.73337e-05
													10	8	1.77246e-06
													10	9	4.83916e-08
													11	0	0.177851
													11	11	8.81042e-11
													11	1	0.326726
													11	2	0.264356
													11	3	0.124224
													11	4	0.0376482
													11	5	0.00772677
													11	6	0.0010965
													11	7	0.000107716
													11	8	7.18941e-06
													11	9	3.11014e-07
													11	10	7.86165e-09
													12	0	0.14704
													12	12	1.52632e-11
													12	1	0.300935
													12	2	0.275161
													12	3	0.1485
													12	4	0.0526466
													12	5	0.0129104
													12	6	0.00224514
													12	7	0.000279015
													12	8	2.46048e-05
													12	9	1.50263e-06
													12	10	6.038e-08
													12	11	1.4348e-09
													13	0	0.105393
													13	13	4.32305e-12
													13	1	0.257347
													13	2	0.282461
													13	3	0.184375
													13	4	0.0797956
													13	5	0.024165
													13	6	0.00526589
													13	7	0.000835886
													13	8	9.66621e-05
													13	9	8.04592e-06
													13	10	4.68873e-07
													13	11	1.813e-08
													13	12	4.17322e-10
													#N/A	#N/A	#N/A
													#N/A	#N/A	#N/A
													#N/A	#N/A	#N/A
													#N/A	#N/A	#N/A
													#N/A	#N/A	#N/A
													#N/A	#N/A	#N/A
													#N/A	#N/A	#N/A
													#N/A	#N/A	#N/A
													#N/A	#N/A	#N/A
													#N/A	#N/A	#N/A
													#N/A	#N/A	#N/A
													#N/A	#N/A	#N/A
													#N/A	#N/A	#N/A
													#N/A	#N/A	#N/A
													#N/A	#N/A	#N/A
													#N/A	#N/A	#N/A
													#N/A	#N/A	#N/A
													#N/A	#N/A	#N/A
													#N/A	#N/A	#N/A
													#N/A	#N/A	#N/A
													#N/A	#N/A	#N/A
													#N/A	#N/A	#N/A
													#N/A	#N/A	#N/A
													#N/A	#N/A	#N/A
													#N/A	#N/A	#N/A
													#N/A	#N/A	#N/A
													#N/A	#N/A	#N/A
													#N/A	#N/A	#N/A
													#N/A	#N/A	#N/A
													#N/A	#N/A	#N/A
													#N/A	#N/A	#N/A
													#N/A	#N/A	#N/A
													#N/A	#N/A	#N/A
													#N/A	#N/A	#N/A
													#N/A	#N/A	#N/A
													#N/A	#N/A	#N/A
													#N/A	#N/A	#N/A
													#N/A	#N/A	#N/A
													#N/A	#N/A	#N/A
													#N/A	#N/A	#N/A
													#N/A	#N/A	#N/A
													#N/A	#N/A	#N/A
													#N/A	#N/A	#N/A
													#N/A	#N/A	#N/A
													#N/A	#N/A	#N/A
													#N/A	#N/A	#N/A
													#N/A	#N/A	#N/A
													#N/A	#N/A	#N/A
													#N/A	#N/A	#N/A
													#N/A	#N/A	#N/A
													#N/A	#N/A	#N/A
													#N/A	#N/A	#N/A
													#N/A	#N/A	#N/A
													#N/A	#N/A	#N/A
													#N/A	#N/A	#N/A
													#N/A	#N/A	#N/A
													#N/A	#N/A	#N/A
													#N/A	#N/A	#N/A
													#N/A	#N/A	#N/A
													#N/A	#N/A	#N/A
													#N/A	#N/A	#N/A
													#N/A	#N/A	#N/A
													#N/A	#N/A	#N/A
													#N/A	#N/A	#N/A
													#N/A	#N/A	#N/A
													#N/A	#N/A	#N/A
													#N/A	#N/A	#N/A
													#N/A	#N/A	#N/A
													#N/A	#N/A	#N/A
													#N/A	#N/A	#N/A
													#N/A	#N/A	#N/A
													#N/A	#N/A	#N/A
													#N/A	#N/A	#N/A
													#N/A	#N/A	#N/A
													#N/A	#N/A	#N/A
													#N/A	#N/A	#N/A
													#N/A	#N/A	#N/A
													#N/A	#N/A	#N/A
													#N/A	#N/A	#N/A
													#N/A	#N/A	#N/A
													#N/A	#N/A	#N/A
													#N/A	#N/A	#N/A
													#N/A	#N/A	#N/A
													#N/A	#N/A	#N/A
													#N/A	#N/A	#N/A
													#N/A	#N/A	#N/A
													#N/A	#N/A	#N/A
													#N/A	#N/A	#N/A
													#N/A	#N/A	#N/A
													#N/A	#N/A	#N/A
													#N/A	#N/A	#N/A
													#N/A	#N/A	#N/A
													#N/A	#N/A	#N/A
													#N/A	#N/A	#N/A
													#N/A	#N/A	#N/A
													#N/A	#N/A	#N/A
													#N/A	#N/A	#N/A
													#N/A	#N/A	#N/A
													#N/A	#N/A	#N/A
													#N/A	#N/A	#N/A
													#N/A	#N/A	#N/A
													#N/A	#N/A	#N/A
													#N/A	#N/A	#N/A
													#N/A	#N/A	#N/A
													#N/A	#N/A	#N/A
													#N/A	#N/A	#N/A
													#N/A	#N/A	#N/A
													#N/A	#N/A	#N/A
													#N/A	#N/A	#N/A
													#N/A	#N/A	#N/A
													#N/A	#N/A	#N/A
													#N/A	#N/A	#N/A
													#N/A	#N/A	#N/A
													#N/A	#N/A	#N/A
													#N/A	#N/A	#N/A
													#N/A	#N/A	#N/A
													#N/A	#N/A	#N/A
													#N/A	#N/A	#N/A
													#N/A	#N/A	#N/A
													#N/A	#N/A	#N/A
													#N/A	#N/A	#N/A
													#N/A	#N/A	#N/A
													#N/A	#N/A	#N/A
													#N/A	#N/A	#N/A
													#N/A	#N/A	#N/A
													#N/A	#N/A	#N/A
													#N/A	#N/A	#N/A
													#N/A	#N/A	#N/A
													#N/A	#N/A	#N/A
													#N/A	#N/A	#N/A
													#N/A	#N/A	#N/A
													#N/A	#N/A	#N/A
													#N/A	#N/A	#N/A
													#N/A	#N/A	#N/A
													#N/A	#N/A	#N/A
													#N/A	#N/A	#N/A
													#N/A	#N/A	#N/A
													#N/A	#N/A	#N/A
													#N/A	#N/A	#N/A
													#N/A	#N/A	#N/A
													#N/A	#N/A	#N/A
													#N/A	#N/A	#N/A
													#N/A	#N/A	#N/A
													#N/A	#N/A	#N/A
													#N/A	#N/A	#N/A
													#N/A	#N/A	#N/A
													#N/A	#N/A	#N/A
													#N/A	#N/A	#N/A
													#N/A	#N/A	#N/A
													#N/A	#N/A	#N/A
													#N/A	#N/A	#N/A
													#N/A	#N/A	#N/A
													#N/A	#N/A	#N/A
													#N/A	#N/A	#N/A
													#N/A	#N/A	#N/A
													#N/A	#N/A	#N/A
													#N/A	#N/A	#N/A
													#N/A	#N/A	#N/A
													#N/A	#N/A	#N/A
													#N/A	#N/A	#N/A
													#N/A	#N/A	#N/A
													#N/A	#N/A	#N/A
													#N/A	#N/A	#N/A
													#N/A	#N/A	#N/A
													#N/A	#N/A	#N/A
													#N/A	#N/A	#N/A
													#N/A	#N/A	#N/A
													#N/A	#N/A	#N/A
													#N/A	#N/A	#N/A
													#N/A	#N/A	#N/A
													#N/A	#N/A	#N/A
													#N/A	#N/A	#N/A
													#N/A	#N/A	#N/A
													#N/A	#N/A	#N/A
													#N/A	#N/A	#N/A
													#N/A	#N/A	#N/A
													#N/A	#N/A	#N/A
													#N/A	#N/A	#N/A
													#N/A	#N/A	#N/A
													#N/A	#N/A	#N/A
													#N/A	#N/A	#N/A
													#N/A	#N/A	#N/A
													#N/A	#N/A	#N/A
													#N/A	#N/A	#N/A
													#N/A	#N/A	#N/A
													#N/A	#N/A	#N/A
													#N/A	#N/A	#N/A
													#N/A	#N/A	#N/A
													#N/A	#N/A	#N/A
													#N/A	#N/A	#N/A
													#N/A	#N/A	#N/A
													#N/A	#N/A	#N/A
													#N/A	#N/A	#N/A
													#N/A	#N/A	#N/A
													#N/A	#N/A	#N/A
													#N/A	#N/A	#N/A
													#N/A	#N/A	#N/A
													#N/A	#N/A	#N/A
													#N/A	#N/A	#N/A
													#N/A	#N/A	#N/A
													#N/A	#N/A	#N/A
													#N/A	#N/A	#N/A
													#N/A	#N/A	#N/A
													#N/A	#N/A	#N/A
													#N/A	#N/A	#N/A
													#N/A	#N/A	#N/A
													#N/A	#N/A	#N/A
													#N/A	#N/A	#N/A
													#N/A	#N/A	#N/A
													#N/A	#N/A	#N/A
													#N/A	#N/A	#N/A
													#N/A	#N/A	#N/A
													#N/A	#N/A	#N/A
													#N/A	#N/A	#N/A
													#N/A	#N/A	#N/A
													#N/A	#N/A	#N/A
													#N/A	#N/A	#N/A
													#N/A	#N/A	#N/A
													#N/A	#N/A	#N/A
													#N/A	#N/A	#N/A
													#N/A	#N/A	#N/A
													#N/A	#N/A	#N/A
													#N/A	#N/A	#N/A
													#N/A	#N/A	#N/A
													#N/A	#N/A	#N/A
													#N/A	#N/A	#N/A
													#N/A	#N/A	#N/A
													#N/A	#N/A	#N/A
													#N/A	#N/A	#N/A
													#N/A	#N/A	#N/A
													#N/A	#N/A	#N/A
													#N/A	#N/A	#N/A
													#N/A	#N/A	#N/A
													#N/A	#N/A	#N/A
													#N/A	#N/A	#N/A
													#N/A	#N/A	#N/A
													#N/A	#N/A	#N/A
													#N/A	#N/A	#N/A
													#N/A	#N/A	#N/A
													#N/A	#N/A	#N/A
													#N/A	#N/A	#N/A
													#N/A	#N/A	#N/A
													#N/A	#N/A	#N/A
													#N/A	#N/A	#N/A
													#N/A	#N/A	#N/A
													#N/A	#N/A	#N/A
													#N/A	#N/A	#N/A
													#N/A	#N/A	#N/A
													#N/A	#N/A	#N/A
													#N/A	#N/A	#N/A
													#N/A	#N/A	#N/A
													#N/A	#N/A	#N/A
													#N/A	#N/A	#N/A
													#N/A	#N/A	#N/A
													#N/A	#N/A	#N/A
													#N/A	#N/A	#N/A
													#N/A	#N/A	#N/A
													#N/A	#N/A	#N/A
													#N/A	#N/A	#N/A
													#N/A	#N/A	#N/A
													#N/A	#N/A	#N/A
													#N/A	#N/A	#N/A
													#N/A	#N/A	#N/A
													#N/A	#N/A	#N/A
													#N/A	#N/A	#N/A
													#N/A	#N/A	#N/A
													#N/A	#N/A	#N/A
													#N/A	#N/A	#N/A
													#N/A	#N/A	#N/A
													#N/A	#N/A	#N/A
													#N/A	#N/A	#N/A
													#N/A	#N/A	#N/A
													#N/A	#N/A	#N/A
													#N/A	#N/A	#N/A
													#N/A	#N/A	#N/A
													#N/A	#N/A	#N/A
													#N/A	#N/A	#N/A
													#N/A	#N/A	#N/A
													#N/A	#N/A	#N/A
													#N/A	#N/A	#N/A
													#N/A	#N/A	#N/A
													#N/A	#N/A	#N/A
													#N/A	#N/A	#N/A
													#N/A	#N/A	#N/A
													#N/A	#N/A	#N/A
													#N/A	#N/A	#N/A
													#N/A	#N/A	#N/A
													#N/A	#N/A	#N/A
													#N/A	#N/A	#N/A
													#N/A	#N/A	#N/A
													#N/A	#N/A	#N/A
													#N/A	#N/A	#N/A
													#N/A	#N/A	#N/A
													#N/A	#N/A	#N/A
													#N/A	#N/A	#N/A
													#N/A	#N/A	#N/A
													#N/A	#N/A	#N/A
													#N/A	#N/A	#N/A
													#N/A	#N/A	#N/A
													#N/A	#N/A	#N/A
													#N/A	#N/A	#N/A
													#N/A	#N/A	#N/A
													#N/A	#N/A	#N/A
													#N/A	#N/A	#N/A
													#N/A	#N/A	#N/A
													#N/A	#N/A	#N/A
													#N/A	#N/A	#N/A
													#N/A	#N/A	#N/A
													#N/A	#N/A	#N/A
													#N/A	#N/A	#N/A
													#N/A	#N/A	#N/A
													#N/A	#N/A	#N/A
													#N/A	#N/A	#N/A
													#N/A	#N/A	#N/A
													#N/A	#N/A	#N/A
													#N/A	#N/A	#N/A
													#N/A	#N/A	#N/A
													#N/A	#N/A	#N/A
													#N/A	#N/A	#N/A
													#N/A	#N/A	#N/A
													#N/A	#N/A	#N/A
													#N/A	#N/A	#N/A
													#N/A	#N/A	#N/A
													#N/A	#N/A	#N/A
													#N/A	#N/A	#N/A
													#N/A	#N/A	#N/A
													#N/A	#N/A	#N/A
													#N/A	#N/A	#N/A
													#N/A	#N/A	#N/A
													#N/A	#N/A	#N/A
													#N/A	#N/A	#N/A
													#N/A	#N/A	#N/A
													#N/A	#N/A	#N/A
													#N/A	#N/A	#N/A
													#N/A	#N/A	#N/A
													#N/A	#N/A	#N/A
													#N/A	#N/A	#N/A
													#N/A	#N/A	#N/A
													#N/A	#N/A	#N/A
													#N/A	#N/A	#N/A
													#N/A	#N/A	#N/A
													#N/A	#N/A	#N/A
													#N/A	#N/A	#N/A
													#N/A	#N/A	#N/A
													#N/A	#N/A	#N/A
													#N/A	#N/A	#N/A
													#N/A	#N/A	#N/A
													#N/A	#N/A	#N/A
													#N/A	#N/A	#N/A
													#N/A	#N/A	#N/A
													#N/A	#N/A	#N/A
													#N/A	#N/A	#N/A
													#N/A	#N/A	#N/A
													#N/A	#N/A	#N/A
													#N/A	#N/A	#N/A
													#N/A	#N/A	#N/A
													#N/A	#N/A	#N/A
													#N/A	#N/A	#N/A
													#N/A	#N/A	#N/A
													#N/A	#N/A	#N/A
													#N/A	#N/A	#N/A
													#N/A	#N/A	#N/A
													#N/A	#N/A	#N/A
													#N/A	#N/A	#N/A
													#N/A	#N/A	#N/A
													#N/A	#N/A	#N/A
													#N/A	#N/A	#N/A
													#N/A	#N/A	#N/A
													#N/A	#N/A	#N/A
													#N/A	#N/A	#N/A
													#N/A	#N/A	#N/A
													#N/A	#N/A	#N/A
													#N/A	#N/A	#N/A
													#N/A	#N/A	#N/A
													#N/A	#N/A	#N/A
													#N/A	#N/A	#N/A
													#N/A	#N/A	#N/A
													#N/A	#N/A	#N/A
													#N/A	#N/A	#N/A
													#N/A	#N/A	#N/A
													#N/A	#N/A	#N/A
													#N/A	#N/A	#N/A
													#N/A	#N/A	#N/A
													#N/A	#N/A	#N/A
													#N/A	#N/A	#N/A
													#N/A	#N/A	#N/A
													#N/A	#N/A	#N/A
													#N/A	#N/A	#N/A
													#N/A	#N/A	#N/A
													#N/A	#N/A	#N/A
													#N/A	#N/A	#N/A
													#N/A	#N/A	#N/A
													#N/A	#N/A	#N/A
													#N/A	#N/A	#N/A
													#N/A	#N/A	#N/A
													#N/A	#N/A	#N/A
													#N/A	#N/A	#N/A
													#N/A	#N/A	#N/A
													#N/A	#N/A	#N/A
													#N/A	#N/A	#N/A
													#N/A	#N/A	#N/A
													#N/A	#N/A	#N/A
													#N/A	#N/A	#N/A
													#N/A	#N/A	#N/A
													#N/A	#N/A	#N/A
													#N/A	#N/A	#N/A
													#N/A	#N/A	#N/A
													#N/A	#N/A	#N/A
													#N/A	#N/A	#N/A
													#N/A	#N/A	#N/A
													#N/A	#N/A	#N/A
													#N/A	#N/A	#N/A
													#N/A	#N/A	#N/A
													#N/A	#N/A	#N/A
													#N/A	#N/A	#N/A
													#N/A	#N/A	#N/A
													#N/A	#N/A	#N/A
													#N/A	#N/A	#N/A
													#N/A	#N/A	#N/A
													#N/A	#N/A	#N/A
													#N/A	#N/A	#N/A
													#N/A	#N/A	#N/A
													#N/A	#N/A	#N/A
													#N/A	#N/A	#N/A
													#N/A	#N/A	#N/A
													#N/A	#N/A	#N/A
													#N/A	#N/A	#N/A
													#N/A	#N/A	#N/A
													#N/A	#N/A	#N/A
													#N/A	#N/A	#N/A
													#N/A	#N/A	#N/A
													#N/A	#N/A	#N/A
													#N/A	#N/A	#N/A
													#N/A	#N/A	#N/A
													#N/A	#N/A	#N/A
													#N/A	#N/A	#N/A
													#N/A	#N/A	#N/A
													#N/A	#N/A	#N/A
													#N/A	#N/A	#N/A
													#N/A	#N/A	#N/A
													#N/A	#N/A	#N/A
													#N/A	#N/A	#N/A
													#N/A	#N/A	#N/A
													#N/A	#N/A	#N/A
													#N/A	#N/A	#N/A
													#N/A	#N/A	#N/A
													#N/A	#N/A	#N/A
													#N/A	#N/A	#N/A
													#N/A	#N/A	#N/A
													#N/A	#N/A	#N/A
													#N/A	#N/A	#N/A
													#N/A	#N/A	#N/A
													#N/A	#N/A	#N/A
													#N/A	#N/A	#N/A
													#N/A	#N/A	#N/A
													#N/A	#N/A	#N/A
													#N/A	#N/A	#N/A
													#N/A	#N/A	#N/A
													#N/A	#N/A	#N/A
													#N/A	#N/A	#N/A
													#N/A	#N/A	#N/A
													#N/A	#N/A	#N/A
													#N/A	#N/A	#N/A
													#N/A	#N/A	#N/A
													#N/A	#N/A	#N/A
													#N/A	#N/A	#N/A
													#N/A	#N/A	#N/A
													#N/A	#N/A	#N/A
													#N/A	#N/A	#N/A
													#N/A	#N/A	#N/A
													#N/A	#N/A	#N/A
													#N/A	#N/A	#N/A
													#N/A	#N/A	#N/A
													#N/A	#N/A	#N/A
													#N/A	#N/A	#N/A
													#N/A	#N/A	#N/A
													#N/A	#N/A	#N/A
													#N/A	#N/A	#N/A
													#N/A	#N/A	#N/A
													#N/A	#N/A	#N/A
													#N/A	#N/A	#N/A
													#N/A	#N/A	#N/A
													#N/A	#N/A	#N/A
													#N/A	#N/A	#N/A
													#N/A	#N/A	#N/A
													#N/A	#N/A	#N/A
													#N/A	#N/A	#N/A
													#N/A	#N/A	#N/A
													#N/A	#N/A	#N/A
													#N/A	#N/A	#N/A
													#N/A	#N/A	#N/A
													#N/A	#N/A	#N/A
													#N/A	#N/A	#N/A
													#N/A	#N/A	#N/A
													#N/A	#N/A	#N/A
													#N/A	#N/A	#N/A
													#N/A	#N/A	#N/A
													#N/A	#N/A	#N/A
													#N/A	#N/A	#N/A
													#N/A	#N/A	#N/A
													#N/A	#N/A	#N/A
													#N/A	#N/A	#N/A
													#N/A	#N/A	#N/A
													#N/A	#N/A	#N/A
													#N/A	#N/A	#N/A
													#N/A	#N/A	#N/A
													#N/A	#N/A	#N/A
													#N/A	#N/A	#N/A
													#N/A	#N/A	#N/A
													#N/A	#N/A	#N/A
													#N/A	#N/A	#N/A
													#N/A	#N/A	#N/A
													#N/A	#N/A	#N/A
													#N/A	#N/A	#N/A
													#N/A	#N/A	#N/A
													#N/A	#N/A	#N/A
													#N/A	#N/A	#N/A
													#N/A	#N/A	#N/A
													#N/A	#N/A	#N/A
													#N/A	#N/A	#N/A
													#N/A	#N/A	#N/A
													#N/A	#N/A	#N/A
													#N/A	#N/A	#N/A
													#N/A	#N/A	#N/A
													#N/A	#N/A	#N/A
													#N/A	#N/A	#N/A
													#N/A	#N/A	#N/A
													#N/A	#N/A	#N/A
													#N/A	#N/A	#N/A
													#N/A	#N/A	#N/A
													#N/A	#N/A	#N/A
													#N/A	#N/A	#N/A
													#N/A	#N/A	#N/A
													#N/A	#N/A	#N/A
													#N/A	#N/A	#N/A
													#N/A	#N/A	#N/A
													#N/A	#N/A	#N/A
													#N/A	#N/A	#N/A
													#N/A	#N/A	#N/A
													#N/A	#N/A	#N/A
													#N/A	#N/A	#N/A
													#N/A	#N/A	#N/A
													#N/A	#N/A	#N/A
													#N/A	#N/A	#N/A
													#N/A	#N/A	#N/A
													#N/A	#N/A	#N/A
													#N/A	#N/A	#N/A
													#N/A	#N/A	#N/A
													#N/A	#N/A	#N/A
													#N/A	#N/A	#N/A
													#N/A	#N/A	#N/A
													#N/A	#N/A	#N/A
													#N/A	#N/A	#N/A
													#N/A	#N/A	#N/A
													#N/A	#N/A	#N/A
													#N/A	#N/A	#N/A
													#N/A	#N/A	#N/A
													#N/A	#N/A	#N/A
													#N/A	#N/A	#N/A
													#N/A	#N/A	#N/A
													#N/A	#N/A	#N/A
													#N/A	#N/A	#N/A
													#N/A	#N/A	#N/A
													#N/A	#N/A	#N/A
													#N/A	#N/A	#N/A
													#N/A	#N/A	#N/A
													#N/A	#N/A	#N/A
													#N/A	#N/A	#N/A
													#N/A	#N/A	#N/A
													#N/A	#N/A	#N/A
													#N/A	#N/A	#N/A
													#N/A	#N/A	#N/A
													#N/A	#N/A	#N/A
													#N/A	#N/A	#N/A
													#N/A	#N/A	#N/A
													#N/A	#N/A	#N/A
													#N/A	#N/A	#N/A
													#N/A	#N/A	#N/A
													#N/A	#N/A	#N/A
													#N/A	#N/A	#N/A
													#N/A	#N/A	#N/A
													#N/A	#N/A	#N/A
													#N/A	#N/A	#N/A
													#N/A	#N/A	#N/A
													#N/A	#N/A	#N/A
													#N/A	#N/A	#N/A
													#N/A	#N/A	#N/A
													#N/A	#N/A	#N/A
													#N/A	#N/A	#N/A
													#N/A	#N/A	#N/A
													#N/A	#N/A	#N/A
													#N/A	#N/A	#N/A
													#N/A	#N/A	#N/A
													#N/A	#N/A	#N/A
													#N/A	#N/A	#N/A
													#N/A	#N/A	#N/A
													#N/A	#N/A	#N/A
													#N/A	#N/A	#N/A
													#N/A	#N/A	#N/A
													#N/A	#N/A	#N/A
													#N/A	#N/A	#N/A
													#N/A	#N/A	#N/A
													#N/A	#N/A	#N/A
													#N/A	#N/A	#N/A
													#N/A	#N/A	#N/A
													#N/A	#N/A	#N/A
													#N/A	#N/A	#N/A
													#N/A	#N/A	#N/A
													#N/A	#N/A	#N/A
													#N/A	#N/A	#N/A
													#N/A	#N/A	#N/A
													#N/A	#N/A	#N/A
													#N/A	#N/A	#N/A
													#N/A	#N/A	#N/A
													#N/A	#N/A	#N/A
													#N/A	#N/A	#N/A
													#N/A	#N/A	#N/A
													#N/A	#N/A	#N/A
													#N/A	#N/A	#N/A
													#N/A	#N/A	#N/A
													#N/A	#N/A	#N/A
													#N/A	#N/A	#N/A
													#N/A	#N/A	#N/A
													#N/A	#N/A	#N/A
													#N/A	#N/A	#N/A
													#N/A	#N/A	#N/A
													#N/A	#N/A	#N/A
													#N/A	#N/A	#N/A
													#N/A	#N/A	#N/A
													#N/A	#N/A	#N/A
													#N/A	#N/A	#N/A
													#N/A	#N/A	#N/A
													#N/A	#N/A	#N/A
													#N/A	#N/A	#N/A
													#N/A	#N/A	#N/A
													#N/A	#N/A	#N/A
													#N/A	#N/A	#N/A
													#N/A	#N/A	#N/A
													#N/A	#N/A	#N/A
													#N/A	#N/A	#N/A
													#N/A	#N/A	#N/A
													#N/A	#N/A	#N/A
													#N/A	#N/A	#N/A
													#N/A	#N/A	#N/A
													#N/A	#N/A	#N/A
													#N/A	#N/A	#N/A
													#N/A	#N/A	#N/A
													#N/A	#N/A	#N/A
													#N/A	#N/A	#N/A
													#N/A	#N/A	#N/A
													#N/A	#N/A	#N/A
													#N/A	#N/A	#N/A
													#N/A	#N/A	#N/A
													#N/A	#N/A	#N/A
													#N/A	#N/A	#N/A
													#N/A	#N/A	#N/A
													#N/A	#N/A	#N/A
													#N/A	#N/A	#N/A
													#N/A	#N/A	#N/A
													#N/A	#N/A	#N/A
													#N/A	#N/A	#N/A
													#N/A	#N/A	#N/A
													#N/A	#N/A	#N/A
													#N/A	#N/A	#N/A
													#N/A	#N/A	#N/A
													#N/A	#N/A	#N/A
													#N/A	#N/A	#N/A
													#N/A	#N/A	#N/A
													#N/A	#N/A	#N/A
													#N/A	#N/A	#N/A
													#N/A	#N/A	#N/A
													#N/A	#N/A	#N/A
													#N/A	#N/A	#N/A
													#N/A	#N/A	#N/A
													#N/A	#N/A	#N/A
													#N/A	#N/A	#N/A
													#N/A	#N/A	#N/A
													#N/A	#N/A	#N/A
													#N/A	#N/A	#N/A
													#N/A	#N/A	#N/A
													#N/A	#N/A	#N/A
													#N/A	#N/A	#N/A
													#N/A	#N/A	#N/A
													#N/A	#N/A	#N/A
													#N/A	#N/A	#N/A
													#N/A	#N/A	#N/A
													#N/A	#N/A	#N/A
													#N/A	#N/A	#N/A
													#N/A	#N/A	#N/A
													#N/A	#N/A	#N/A
													#N/A	#N/A	#N/A
													#N/A	#N/A	#N/A
													#N/A	#N/A	#N/A
													#N/A	#N/A	#N/A
													#N/A	#N/A	#N/A
													#N/A	#N/A	#N/A
													#N/A	#N/A	#N/A
													#N/A	#N/A	#N/A
													#N/A	#N/A	#N/A
													#N/A	#N/A	#N/A
													#N/A	#N/A	#N/A
													#N/A	#N/A	#N/A
													#N/A	#N/A	#N/A
													#N/A	#N/A	#N/A
													#N/A	#N/A	#N/A
													#N/A	#N/A	#N/A
													#N/A	#N/A	#N/A
													#N/A	#N/A	#N/A
													#N/A	#N/A	#N/A
													#N/A	#N/A	#N/A
													#N/A	#N/A	#N/A
													#N/A	#N/A	#N/A
													#N/A	#N/A	#N/A
													#N/A	#N/A	#N/A
													#N/A	#N/A	#N/A
													#N/A	#N/A	#N/A
													#N/A	#N/A	#N/A
													#N/A	#N/A	#N/A
													#N/A	#N/A	#N/A
													#N/A	#N/A	#N/A
													#N/A	#N/A	#N/A
													#N/A	#N/A	#N/A
													#N/A	#N/A	#N/A
													#N/A	#N/A	#N/A
													#N/A	#N/A	#N/A
													#N/A	#N/A	#N/A
													#N/A	#N/A	#N/A
													#N/A	#N/A	#N/A
													#N/A	#N/A	#N/A
													#N/A	#N/A	#N/A
													#N/A	#N/A	#N/A
													#N/A	#N/A	#N/A
													#N/A	#N/A	#N/A
													#N/A	#N/A	#N/A
													#N/A	#N/A	#N/A
													#N/A	#N/A	#N/A
													#N/A	#N/A	#N/A
													#N/A	#N/A	#N/A
													#N/A	#N/A	#N/A
													#N/A	#N/A	#N/A
													#N/A	#N/A	#N/A
													#N/A	#N/A	#N/A
													#N/A	#N/A	#N/A
													#N/A	#N/A	#N/A
													#N/A	#N/A	#N/A
													#N/A	#N/A	#N/A
													#N/A	#N/A	#N/A
													#N/A	#N/A	#N/A
													#N/A	#N/A	#N/A
													#N/A	#N/A	#N/A
													#N/A	#N/A	#N/A
													#N/A	#N/A	#N/A
													#N/A	#N/A	#N/A
													#N/A	#N/A	#N/A
													#N/A	#N/A	#N/A
													#N/A	#N/A	#N/A
													#N/A	#N/A	#N/A
													#N/A	#N/A	#N/A
													#N/A	#N/A	#N/A
													#N/A	#N/A	#N/A
													#N/A	#N/A	#N/A
													#N/A	#N/A	#N/A
													#N/A	#N/A	#N/A
													#N/A	#N/A	#N/A
													#N/A	#N/A	#N/A
													#N/A	#N/A	#N/A
													#N/A	#N/A	#N/A
													#N/A	#N/A	#N/A
													#N/A	#N/A	#N/A
													#N/A	#N/A	#N/A
													#N/A	#N/A	#N/A
													#N/A	#N/A	#N/A
													#N/A	#N/A	#N/A
													#N/A	#N/A	#N/A
													#N/A	#N/A	#N/A
													#N/A	#N/A	#N/A
													#N/A	#N/A	#N/A
													#N/A	#N/A	#N/A
													#N/A	#N/A	#N/A
													#N/A	#N/A	#N/A
													#N/A	#N/A	#N/A
													#N/A	#N/A	#N/A
													#N/A	#N/A	#N/A
													#N/A	#N/A	#N/A
													#N/A	#N/A	#N/A
													#N/A	#N/A	#N/A
													#N/A	#N/A	#N/A
													#N/A	#N/A	#N/A
													#N/A	#N/A	#N/A
													#N/A	#N/A	#N/A
													#N/A	#N/A	#N/A
													#N/A	#N/A	#N/A
													#N/A	#N/A	#N/A
													#N/A	#N/A	#N/A
													#N/A	#N/A	#N/A
													#N/A	#N/A	#N/A
													#N/A	#N/A	#N/A
													#N/A	#N/A	#N/A
													#N/A	#N/A	#N/A
													#N/A	#N/A	#N/A
													#N/A	#N/A	#N/A
													#N/A	#N/A	#N/A
													#N/A	#N/A	#N/A
													#N/A	#N/A	#N/A
													#N/A	#N/A	#N/A
													#N/A	#N/A	#N/A
													#N/A	#N/A	#N/A
													#N/A	#N/A	#N/A
													#N/A	#N/A	#N/A
													#N/A	#N/A	#N/A
													#N/A	#N/A	#N/A
													#N/A	#N/A	#N/A
													#N/A	#N/A	#N/A
													#N/A	#N/A	#N/A
													#N/A	#N/A	#N/A
													#N/A	#N/A	#N/A
													#N/A	#N/A	#N/A
													#N/A	#N/A	#N/A
													#N/A	#N/A	#N/A
													#N/A	#N/A	#N/A
													#N/A	#N/A	#N/A
													#N/A	#N/A	#N/A
													#N/A	#N/A	#N/A
													#N/A	#N/A	#N/A
													#N/A	#N/A	#N/A
													#N/A	#N/A	#N/A
													#N/A	#N/A	#N/A
													#N/A	#N/A	#N/A
													#N/A	#N/A	#N/A
													#N/A	#N/A	#N/A
													#N/A	#N/A	#N/A
													#N/A	#N/A	#N/A
													#N/A	#N/A	#N/A
													#N/A	#N/A	#N/A
													#N/A	#N/A	#N/A
													#N/A	#N/A	#N/A
													#N/A	#N/A	#N/A
													#N/A	#N/A	#N/A
													#N/A	#N/A	#N/A
													#N/A	#N/A	#N/A
													#N/A	#N/A	#N/A
													#N/A	#N/A	#N/A
													#N/A	#N/A	#N/A
													#N/A	#N/A	#N/A
													#N/A	#N/A	#N/A
													#N/A	#N/A	#N/A
													#N/A	#N/A	#N/A
													#N/A	#N/A	#N/A
													#N/A	#N/A	#N/A
													#N/A	#N/A	#N/A
													#N/A	#N/A	#N/A
													#N/A	#N/A	#N/A
													#N/A	#N/A	#N/A
													#N/A	#N/A	#N/A
													#N/A	#N/A	#N/A
													#N/A	#N/A	#N/A
													#N/A	#N/A	#N/A
													#N/A	#N/A	#N/A
													#N/A	#N/A	#N/A
													#N/A	#N/A	#N/A
													#N/A	#N/A	#N/A
													#N/A	#N/A	#N/A
													#N/A	#N/A	#N/A
													#N/A	#N/A	#N/A
													#N/A	#N/A	#N/A
													#N/A	#N/A	#N/A
													#N/A	#N/A	#N/A
													#N/A	#N/A	#N/A
													#N/A	#N/A	#N/A
													#N/A	#N/A	#N/A
													#N/A	#N/A	#N/A
													#N/A	#N/A	#N/A
													#N/A	#N/A	#N/A
													#N/A	#N/A	#N/A
													#N/A	#N/A	#N/A
													#N/A	#N/A	#N/A
													#N/A	#N/A	#N/A
													#N/A	#N/A	#N/A
													#N/A	#N/A	#N/A
													#N/A	#N/A	#N/A
													#N/A	#N/A	#N/A
													#N/A	#N/A	#N/A
													#N/A	#N/A	#N/A
													#N/A	#N/A	#N/A
													#N/A	#N/A	#N/A
													#N/A	#N/A	#N/A
													#N/A	#N/A	#N/A
													#N/A	#N/A	#N/A
													#N/A	#N/A	#N/A
													#N/A	#N/A	#N/A
													#N/A	#N/A	#N/A
													#N/A	#N/A	#N/A
													#N/A	#N/A	#N/A
													#N/A	#N/A	#N/A
													#N/A	#N/A	#N/A
													#N/A	#N/A	#N/A
													#N/A	#N/A	#N/A
													#N/A	#N/A	#N/A
													#N/A	#N/A	#N/A
													#N/A	#N/A	#N/A
													#N/A	#N/A	#N/A
													#N/A	#N/A	#N/A
													#N/A	#N/A	#N/A
													#N/A	#N/A	#N/A
													#N/A	#N/A	#N/A
													#N/A	#N/A	#N/A
													#N/A	#N/A	#N/A
													#N/A	#N/A	#N/A
													#N/A	#N/A	#N/A
													#N/A	#N/A	#N/A
													#N/A	#N/A	#N/A
													#N/A	#N/A	#N/A
													#N/A	#N/A	#N/A
													#N/A	#N/A	#N/A
													#N/A	#N/A	#N/A
													#N/A	#N/A	#N/A
													#N/A	#N/A	#N/A
													#N/A	#N/A	#N/A
													#N/A	#N/A	#N/A
													#N/A	#N/A	#N/A
													#N/A	#N/A	#N/A
													#N/A	#N/A	#N/A
													#N/A	#N/A	#N/A
													#N/A	#N/A	#N/A
													#N/A	#N/A	#N/A
													#N/A	#N/A	#N/A
													#N/A	#N/A	#N/A
													#N/A	#N/A	#N/A
													#N/A	#N/A	#N/A
													#N/A	#N/A	#N/A
													#N/A	#N/A	#N/A
													#N/A	#N/A	#N/A
													#N/A	#N/A	#N/A
													#N/A	#N/A	#N/A
													#N/A	#N/A	#N/A
													#N/A	#N/A	#N/A
													#N/A	#N/A	#N/A
													#N/A	#N/A	#N/A
													#N/A	#N/A	#N/A
													#N/A	#N/A	#N/A
													#N/A	#N/A	#N/A
													#N/A	#N/A	#N/A
													#N/A	#N/A	#N/A
													#N/A	#N/A	#N/A
													#N/A	#N/A	#N/A
													#N/A	#N/A	#N/A
													#N/A	#N/A	#N/A
													#N/A	#N/A	#N/A
													#N/A	#N/A	#N/A
													#N/A	#N/A	#N/A
													#N/A	#N/A	#N/A
													#N/A	#N/A	#N/A
													#N/A	#N/A	#N/A
													#N/A	#N/A	#N/A
													#N/A	#N/A	#N/A
													#N/A	#N/A	#N/A
													#N/A	#N/A	#N/A
													#N/A	#N/A	#N/A
													#N/A	#N/A	#N/A
													#N/A	#N/A	#N/A
													#N/A	#N/A	#N/A
													#N/A	#N/A	#N/A
													#N/A	#N/A	#N/A
													#N/A	#N/A	#N/A
													#N/A	#N/A	#N/A
													#N/A	#N/A	#N/A
													#N/A	#N/A	#N/A
													#N/A	#N/A	#N/A
													#N/A	#N/A	#N/A
													#N/A	#N/A	#N/A
													#N/A	#N/A	#N/A
													#N/A	#N/A	#N/A
													#N/A	#N/A	#N/A
													#N/A	#N/A	#N/A
													#N/A	#N/A	#N/A
													#N/A	#N/A	#N/A
													#N/A	#N/A	#N/A
													#N/A	#N/A	#N/A
													#N/A	#N/A	#N/A
													#N/A	#N/A	#N/A
													#N/A	#N/A	#N/A
													#N/A	#N/A	#N/A
													#N/A	#N/A	#N/A
													#N/A	#N/A	#N/A
													#N/A	#N/A	#N/A
													#N/A	#N/A	#N/A
													#N/A	#N/A	#N/A
													#N/A	#N/A	#N/A
													#N/A	#N/A	#N/A
													#N/A	#N/A	#N/A
													#N/A	#N/A	#N/A
													#N/A	#N/A	#N/A
													#N/A	#N/A	#N/A
													#N/A	#N/A	#N/A
													#N/A	#N/A	#N/A
													#N/A	#N/A	#N/A
													#N/A	#N/A	#N/A
													#N/A	#N/A	#N/A
													#N/A	#N/A	#N/A
													#N/A	#N/A	#N/A
													#N/A	#N/A	#N/A
													#N/A	#N/A	#N/A
													#N/A	#N/A	#N/A
													#N/A	#N/A	#N/A
													#N/A	#N/A	#N/A
													#N/A	#N/A	#N/A
													#N/A	#N/A	#N/A
													#N/A	#N/A	#N/A
													#N/A	#N/A	#N/A
													#N/A	#N/A	#N/A
													#N/A	#N/A	#N/A
													#N/A	#N/A	#N/A
													#N/A	#N/A	#N/A
													#N/A	#N/A	#N/A
													#N/A	#N/A	#N/A
													#N/A	#N/A	#N/A
													#N/A	#N/A	#N/A
													#N/A	#N/A	#N/A
													#N/A	#N/A	#N/A
													#N/A	#N/A	#N/A
													#N/A	#N/A	#N/A
													#N/A	#N/A	#N/A
													#N/A	#N/A	#N/A
													#N/A	#N/A	#N/A
													#N/A	#N/A	#N/A
													#N/A	#N/A	#N/A
													#N/A	#N/A	#N/A
													#N/A	#N/A	#N/A
													#N/A	#N/A	#N/A
													#N/A	#N/A	#N/A
													#N/A	#N/A	#N/A
													#N/A	#N/A	#N/A
													#N/A	#N/A	#N/A
													#N/A	#N/A	#N/A
													#N/A	#N/A	#N/A
													#N/A	#N/A	#N/A
													#N/A	#N/A	#N/A
													#N/A	#N/A	#N/A
													#N/A	#N/A	#N/A
													#N/A	#N/A	#N/A
													#N/A	#N/A	#N/A
													#N/A	#N/A	#N/A
													#N/A	#N/A	#N/A
													#N/A	#N/A	#N/A
													#N/A	#N/A	#N/A
													#N/A	#N/A	#N/A
													#N/A	#N/A	#N/A
													#N/A	#N/A	#N/A
													#N/A	#N/A	#N/A
													#N/A	#N/A	#N/A
													#N/A	#N/A	#N/A
													#N/A	#N/A	#N/A
													#N/A	#N/A	#N/A
													#N/A	#N/A	#N/A
													#N/A	#N/A	#N/A
													#N/A	#N/A	#N/A
													#N/A	#N/A	#N/A
													#N/A	#N/A	#N/A
													#N/A	#N/A	#N/A
													#N/A	#N/A	#N/A
													#N/A	#N/A	#N/A
													#N/A	#N/A	#N/A
													#N/A	#N/A	#N/A
													#N/A	#N/A	#N/A
													#N/A	#N/A	#N/A
													#N/A	#N/A	#N/A
													#N/A	#N/A	#N/A
													#N/A	#N/A	#N/A
													#N/A	#N/A	#N/A
													#N/A	#N/A	#N/A
													#N/A	#N/A	#N/A
													#N/A	#N/A	#N/A
													#N/A	#N/A	#N/A
													#N/A	#N/A	#N/A
													#N/A	#N/A	#N/A
													#N/A	#N/A	#N/A
													#N/A	#N/A	#N/A
													#N/A	#N/A	#N/A
													#N/A	#N/A	#N/A
													#N/A	#N/A	#N/A
													#N/A	#N/A	#N/A
													#N/A	#N/A	#N/A
													#N/A	#N/A	#N/A
													#N/A	#N/A	#N/A
													#N/A	#N/A	#N/A
													#N/A	#N/A	#N/A
													#N/A	#N/A	#N/A
													#N/A	#N/A	#N/A
													#N/A	#N/A	#N/A
													#N/A	#N/A	#N/A
													#N/A	#N/A	#N/A
													#N/A	#N/A	#N/A
													#N/A	#N/A	#N/A
													#N/A	#N/A	#N/A
													#N/A	#N/A	#N/A
													#N/A	#N/A	#N/A
													#N/A	#N/A	#N/A
													#N/A	#N/A	#N/A
													#N/A	#N/A	#N/A
													#N/A	#N/A	#N/A
													#N/A	#N/A	#N/A
													#N/A	#N/A	#N/A
													#N/A	#N/A	#N/A
													#N/A	#N/A	#N/A
													#N/A	#N/A	#N/A
													#N/A	#N/A	#N/A
													#N/A	#N/A	#N/A
													#N/A	#N/A	#N/A
													#N/A	#N/A	#N/A
													#N/A	#N/A	#N/A
													#N/A	#N/A	#N/A
													#N/A	#N/A	#N/A
													#N/A	#N/A	#N/A
													#N/A	#N/A	#N/A
													#N/A	#N/A	#N/A
													#N/A	#N/A	#N/A
													#N/A	#N/A	#N/A
													#N/A	#N/A	#N/A
													#N/A	#N/A	#N/A
													#N/A	#N/A	#N/A
													#N/A	#N/A	#N/A
													#N/A	#N/A	#N/A
													#N/A	#N/A	#N/A
													#N/A	#N/A	#N/A
													#N/A	#N/A	#N/A
													#N/A	#N/A	#N/A
													#N/A	#N/A	#N/A
													#N/A	#N/A	#N/A
													#N/A	#N/A	#N/A
													#N/A	#N/A	#N/A
													#N/A	#N/A	#N/A
													#N/A	#N/A	#N/A
													#N/A	#N/A	#N/A
													#N/A	#N/A	#N/A
													#N/A	#N/A	#N/A
													#N/A	#N/A	#N/A
													#N/A	#N/A	#N/A
													#N/A	#N/A	#N/A
													#N/A	#N/A	#N/A
													#N/A	#N/A	#N/A
													#N/A	#N/A	#N/A
													#N/A	#N/A	#N/A
													#N/A	#N/A	#N/A
													#N/A	#N/A	#N/A
													#N/A	#N/A	#N/A
													#N/A	#N/A	#N/A
													#N/A	#N/A	#N/A
													#N/A	#N/A	#N/A
													#N/A	#N/A	#N/A
													#N/A	#N/A	#N/A
													#N/A	#N/A	#N/A
													#N/A	#N/A	#N/A
													#N/A	#N/A	#N/A
													#N/A	#N/A	#N/A
													#N/A	#N/A	#N/A
													#N/A	#N/A	#N/A
													#N/A	#N/A	#N/A
													#N/A	#N/A	#N/A
													#N/A	#N/A	#N/A
													#N/A	#N/A	#N/A
													#N/A	#N/A	#N/A
													#N/A	#N/A	#N/A
													#N/A	#N/A	#N/A
													#N/A	#N/A	#N/A
													#N/A	#N/A	#N/A
													#N/A	#N/A	#N/A
													#N/A	#N/A	#N/A
													#N/A	#N/A	#N/A
													#N/A	#N/A	#N/A
													#N/A	#N/A	#N/A
													#N/A	#N/A	#N/A
													#N/A	#N/A	#N/A
													#N/A	#N/A	#N/A
													#N/A	#N/A	#N/A
													#N/A	#N/A	#N/A
													#N/A	#N/A	#N/A
													#N/A	#N/A	#N/A
													#N/A	#N/A	#N/A
													#N/A	#N/A	#N/A
													#N/A	#N/A	#N/A
													#N/A	#N/A	#N/A
													#N/A	#N/A	#N/A
													#N/A	#N/A	#N/A
													#N/A	#N/A	#N/A
													#N/A	#N/A	#N/A
													#N/A	#N/A	#N/A
													#N/A	#N/A	#N/A
													#N/A	#N/A	#N/A
													#N/A	#N/A	#N/A
													#N/A	#N/A	#N/A
													#N/A	#N/A	#N/A
													#N/A	#N/A	#N/A
													#N/A	#N/A	#N/A
													#N/A	#N/A	#N/A
													#N/A	#N/A	#N/A
													#N/A	#N/A	#N/A
													#N/A	#N/A	#N/A
													#N/A	#N/A	#N/A
													#N/A	#N/A	#N/A
													#N/A	#N/A	#N/A
													#N/A	#N/A	#N/A
													#N/A	#N/A	#N/A
													#N/A	#N/A	#N/A
													#N/A	#N/A	#N/A
													#N/A	#N/A	#N/A
													#N/A	#N/A	#N/A
													#N/A	#N/A	#N/A
													#N/A	#N/A	#N/A
													#N/A	#N/A	#N/A
													#N/A	#N/A	#N/A
													#N/A	#N/A	#N/A
													#N/A	#N/A	#N/A
													#N/A	#N/A	#N/A
													#N/A	#N/A	#N/A
													#N/A	#N/A	#N/A
													#N/A	#N/A	#N/A
													#N/A	#N/A	#N/A
													#N/A	#N/A	#N/A
													#N/A	#N/A	#N/A
													#N/A	#N/A	#N/A
													#N/A	#N/A	#N/A
													#N/A	#N/A	#N/A
													#N/A	#N/A	#N/A
													#N/A	#N/A	#N/A
													#N/A	#N/A	#N/A
													#N/A	#N/A	#N/A
													#N/A	#N/A	#N/A
													#N/A	#N/A	#N/A
													#N/A	#N/A	#N/A
													#N/A	#N/A	#N/A
													#N/A	#N/A	#N/A
													#N/A	#N/A	#N/A
													#N/A	#N/A	#N/A
													#N/A	#N/A	#N/A
													#N/A	#N/A	#N/A
													#N/A	#N/A	#N/A
													#N/A	#N/A	#N/A
													#N/A	#N/A	#N/A
													#N/A	#N/A	#N/A
													#N/A	#N/A	#N/A
													#N/A	#N/A	#N/A
													#N/A	#N/A	#N/A
													#N/A	#N/A	#N/A
													#N/A	#N/A	#N/A
													#N/A	#N/A	#N/A
													#N/A	#N/A	#N/A
													#N/A	#N/A	#N/A
													#N/A	#N/A	#N/A
													#N/A	#N/A	#N/A
													#N/A	#N/A	#N/A
													#N/A	#N/A	#N/A
													#N/A	#N/A	#N/A
													#N/A	#N/A	#N/A
													#N/A	#N/A	#N/A
													#N/A	#N/A	#N/A
													#N/A	#N/A	#N/A
													#N/A	#N/A	#N/A
													#N/A	#N/A	#N/A
													#N/A	#N/A	#N/A
													#N/A	#N/A	#N/A
													#N/A	#N/A	#N/A
													#N/A	#N/A	#N/A
													#N/A	#N/A	#N/A
													#N/A	#N/A	#N/A
													#N/A	#N/A	#N/A
													#N/A	#N/A	#N/A
													#N/A	#N/A	#N/A
													#N/A	#N/A	#N/A
													#N/A	#N/A	#N/A
													#N/A	#N/A	#N/A
													#N/A	#N/A	#N/A
													#N/A	#N/A	#N/A
													#N/A	#N/A	#N/A
													#N/A	#N/A	#N/A
													#N/A	#N/A	#N/A
													#N/A	#N/A	#N/A
													#N/A	#N/A	#N/A
													#N/A	#N/A	#N/A
													#N/A	#N/A	#N/A
													#N/A	#N/A	#N/A
													#N/A	#N/A	#N/A
													#N/A	#N/A	#N/A
													#N/A	#N/A	#N/A
													#N/A	#N/A	#N/A
													#N/A	#N/A	#N/A
													#N/A	#N/A	#N/A
													#N/A	#N/A	#N/A
													#N/A	#N/A	#N/A
													#N/A	#N/A	#N/A
													#N/A	#N/A	#N/A
													#N/A	#N/A	#N/A
													#N/A	#N/A	#N/A
													#N/A	#N/A	#N/A
													#N/A	#N/A	#N/A
													#N/A	#N/A	#N/A
													#N/A	#N/A	#N/A
													#N/A	#N/A	#N/A
													#N/A	#N/A	#N/A
													#N/A	#N/A	#N/A
													#N/A	#N/A	#N/A
													#N/A	#N/A	#N/A
													#N/A	#N/A	#N/A
													#N/A	#N/A	#N/A
													#N/A	#N/A	#N/A
													#N/A	#N/A	#N/A
													#N/A	#N/A	#N/A
													#N/A	#N/A	#N/A
													#N/A	#N/A	#N/A
													#N/A	#N/A	#N/A
													#N/A	#N/A	#N/A
													#N/A	#N/A	#N/A
													#N/A	#N/A	#N/A
													#N/A	#N/A	#N/A
													#N/A	#N/A	#N/A
													#N/A	#N/A	#N/A
													#N/A	#N/A	#N/A
													#N/A	#N/A	#N/A
													#N/A	#N/A	#N/A
													#N/A	#N/A	#N/A
													#N/A	#N/A	#N/A
													#N/A	#N/A	#N/A
													#N/A	#N/A	#N/A
													#N/A	#N/A	#N/A
													#N/A	#N/A	#N/A
													#N/A	#N/A	#N/A
													#N/A	#N/A	#N/A
													#N/A	#N/A	#N/A
													#N/A	#N/A	#N/A
													#N/A	#N/A	#N/A
													#N/A	#N/A	#N/A
													#N/A	#N/A	#N/A
													#N/A	#N/A	#N/A
													#N/A	#N/A	#N/A
													#N/A	#N/A	#N/A
													#N/A	#N/A	#N/A
													#N/A	#N/A	#N/A
													#N/A	#N/A	#N/A
													#N/A	#N/A	#N/A
													#N/A	#N/A	#N/A
													#N/A	#N/A	#N/A
													#N/A	#N/A	#N/A
													#N/A	#N/A	#N/A
													#N/A	#N/A	#N/A
													#N/A	#N/A	#N/A
													#N/A	#N/A	#N/A
													#N/A	#N/A	#N/A
													#N/A	#N/A	#N/A
													#N/A	#N/A	#N/A
													#N/A	#N/A	#N/A
													#N/A	#N/A	#N/A
													#N/A	#N/A	#N/A
													#N/A	#N/A	#N/A
													#N/A	#N/A	#N/A
													#N/A	#N/A	#N/A
													#N/A	#N/A	#N/A
													#N/A	#N/A	#N/A
													#N/A	#N/A	#N/A
													#N/A	#N/A	#N/A
													#N/A	#N/A	#N/A
													#N/A	#N/A	#N/A
													#N/A	#N/A	#N/A
													#N/A	#N/A	#N/A
													#N/A	#N/A	#N/A
													#N/A	#N/A	#N/A
													#N/A	#N/A	#N/A
													#N/A	#N/A	#N/A
													#N/A	#N/A	#N/A
													#N/A	#N/A	#N/A
													#N/A	#N/A	#N/A
													#N/A	#N/A	#N/A
													#N/A	#N/A	#N/A
													#N/A	#N/A	#N/A
													#N/A	#N/A	#N/A
													#N/A	#N/A	#N/A
													#N/A	#N/A	#N/A
													#N/A	#N/A	#N/A
													#N/A	#N/A	#N/A
													#N/A	#N/A	#N/A
													#N/A	#N/A	#N/A
													#N/A	#N/A	#N/A
													#N/A	#N/A	#N/A
													#N/A	#N/A	#N/A
													#N/A	#N/A	#N/A
													#N/A	#N/A	#N/A
													#N/A	#N/A	#N/A
													#N/A	#N/A	#N/A
													#N/A	#N/A	#N/A
													#N/A	#N/A	#N/A
													#N/A	#N/A	#N/A
													#N/A	#N/A	#N/A
													#N/A	#N/A	#N/A
													#N/A	#N/A	#N/A
													#N/A	#N/A	#N/A
													#N/A	#N/A	#N/A
													#N/A	#N/A	#N/A
													#N/A	#N/A	#N/A
													#N/A	#N/A	#N/A
													#N/A	#N/A	#N/A
													#N/A	#N/A	#N/A
													#N/A	#N/A	#N/A
													#N/A	#N/A	#N/A
													#N/A	#N/A	#N/A
													#N/A	#N/A	#N/A
													#N/A	#N/A	#N/A
													#N/A	#N/A	#N/A
													#N/A	#N/A	#N/A
													#N/A	#N/A	#N/A
													#N/A	#N/A	#N/A
													#N/A	#N/A	#N/A
													#N/A	#N/A	#N/A
													#N/A	#N/A	#N/A
													#N/A	#N/A	#N/A
													#N/A	#N/A	#N/A
													#N/A	#N/A	#N/A
													#N/A	#N/A	#N/A
													#N/A	#N/A	#N/A
													#N/A	#N/A	#N/A
													#N/A	#N/A	#N/A
													#N/A	#N/A	#N/A
													#N/A	#N/A	#N/A
													#N/A	#N/A	#N/A
													#N/A	#N/A	#N/A
													#N/A	#N/A	#N/A
													#N/A	#N/A	#N/A
													#N/A	#N/A	#N/A
													#N/A	#N/A	#N/A
													#N/A	#N/A	#N/A
													#N/A	#N/A	#N/A
													#N/A	#N/A	#N/A
													#N/A	#N/A	#N/A
													#N/A	#N/A	#N/A
													#N/A	#N/A	#N/A
													#N/A	#N/A	#N/A
													#N/A	#N/A	#N/A
													#N/A	#N/A	#N/A
													#N/A	#N/A	#N/A
													#N/A	#N/A	#N/A
													#N/A	#N/A	#N/A
													#N/A	#N/A	#N/A
													#N/A	#N/A	#N/A
													#N/A	#N/A	#N/A
													#N/A	#N/A	#N/A
													#N/A	#N/A	#N/A
													#N/A	#N/A	#N/A
													#N/A	#N/A	#N/A
													#N/A	#N/A	#N/A
													#N/A	#N/A	#N/A
													#N/A	#N/A	#N/A
													#N/A	#N/A	#N/A
													#N/A	#N/A	#N/A
													#N/A	#N/A	#N/A
													#N/A	#N/A	#N/A
													#N/A	#N/A	#N/A
													#N/A	#N/A	#N/A
													#N/A	#N/A	#N/A
													#N/A	#N/A	#N/A
													#N/A	#N/A	#N/A
													#N/A	#N/A	#N/A
													#N/A	#N/A	#N/A
													#N/A	#N/A	#N/A
													#N/A	#N/A	#N/A
													#N/A	#N/A	#N/A
													#N/A	#N/A	#N/A
													#N/A	#N/A	#N/A
													#N/A	#N/A	#N/A
													#N/A	#N/A	#N/A
													#N/A	#N/A	#N/A
													#N/A	#N/A	#N/A
													#N/A	#N/A	#N/A
													#N/A	#N/A	#N/A
													#N/A	#N/A	#N/A
													#N/A	#N/A	#N/A
													#N/A	#N/A	#N/A
													#N/A	#N/A	#N/A
													#N/A	#N/A	#N/A
													#N/A	#N/A	#N/A
													#N/A	#N/A	#N/A
													#N/A	#N/A	#N/A
													#N/A	#N/A	#N/A
													#N/A	#N/A	#N/A
													#N/A	#N/A	#N/A
													#N/A	#N/A	#N/A
													#N/A	#N/A	#N/A
													#N/A	#N/A	#N/A
													#N/A	#N/A	#N/A
													#N/A	#N/A	#N/A
													#N/A	#N/A	#N/A
													#N/A	#N/A	#N/A
													#N/A	#N/A	#N/A
													#N/A	#N/A	#N/A
													#N/A	#N/A	#N/A
													#N/A	#N/A	#N/A
													#N/A	#N/A	#N/A
													#N/A	#N/A	#N/A
													#N/A	#N/A	#N/A
													#N/A	#N/A	#N/A
													#N/A	#N/A	#N/A
													#N/A	#N/A	#N/A
													#N/A	#N/A	#N/A
													#N/A	#N/A	#N/A
													#N/A	#N/A	#N/A
													#N/A	#N/A	#N/A
													#N/A	#N/A	#N/A
													#N/A	#N/A	#N/A
													#N/A	#N/A	#N/A
													#N/A	#N/A	#N/A
													#N/A	#N/A	#N/A
													#N/A	#N/A	#N/A
													#N/A	#N/A	#N/A
													#N/A	#N/A	#N/A
													#N/A	#N/A	#N/A
													#N/A	#N/A	#N/A
													#N/A	#N/A	#N/A
													#N/A	#N/A	#N/A
													#N/A	#N/A	#N/A
													#N/A	#N/A	#N/A
													#N/A	#N/A	#N/A
													#N/A	#N/A	#N/A
													#N/A	#N/A	#N/A
													#N/A	#N/A	#N/A
													#N/A	#N/A	#N/A
													#N/A	#N/A	#N/A
													#N/A	#N/A	#N/A
													#N/A	#N/A	#N/A
													#N/A	#N/A	#N/A
													#N/A	#N/A	#N/A
													#N/A	#N/A	#N/A
													#N/A	#N/A	#N/A
													#N/A	#N/A	#N/A
													#N/A	#N/A	#N/A
													#N/A	#N/A	#N/A
													#N/A	#N/A	#N/A
													#N/A	#N/A	#N/A
													#N/A	#N/A	#N/A
													#N/A	#N/A	#N/A
													#N/A	#N/A	#N/A
													#N/A	#N/A	#N/A
													#N/A	#N/A	#N/A
													#N/A	#N/A	#N/A
													#N/A	#N/A	#N/A
													#N/A	#N/A	#N/A
													#N/A	#N/A	#N/A
													#N/A	#N/A	#N/A
													#N/A	#N/A	#N/A
													#N/A	#N/A	#N/A
													#N/A	#N/A	#N/A
													#N/A	#N/A	#N/A
													#N/A	#N/A	#N/A
													#N/A	#N/A	#N/A
													#N/A	#N/A	#N/A
													#N/A	#N/A	#N/A
													#N/A	#N/A	#N/A
													#N/A	#N/A	#N/A
													#N/A	#N/A	#N/A
													#N/A	#N/A	#N/A
													#N/A	#N/A	#N/A
													#N/A	#N/A	#N/A
													#N/A	#N/A	#N/A
													#N/A	#N/A	#N/A
													#N/A	#N/A	#N/A
													#N/A	#N/A	#N/A
													#N/A	#N/A	#N/A
													#N/A	#N/A	#N/A
													#N/A	#N/A	#N/A
													#N/A	#N/A	#N/A
													#N/A	#N/A	#N/A
													#N/A	#N/A	#N/A
													#N/A	#N/A	#N/A
													#N/A	#N/A	#N/A
													#N/A	#N/A	#N/A
													#N/A	#N/A	#N/A
													#N/A	#N/A	#N/A
													#N/A	#N/A	#N/A
													#N/A	#N/A	#N/A
													#N/A	#N/A	#N/A
													#N/A	#N/A	#N/A
													#N/A	#N/A	#N/A
													#N/A	#N/A	#N/A
													#N/A	#N/A	#N/A
													#N/A	#N/A	#N/A
													#N/A	#N/A	#N/A
													#N/A	#N/A	#N/A
													#N/A	#N/A	#N/A
													#N/A	#N/A	#N/A
													#N/A	#N/A	#N/A
													#N/A	#N/A	#N/A
													#N/A	#N/A	#N/A
													#N/A	#N/A	#N/A
													#N/A	#N/A	#N/A
													#N/A	#N/A	#N/A
													#N/A	#N/A	#N/A
													#N/A	#N/A	#N/A
													#N/A	#N/A	#N/A
													#N/A	#N/A	#N/A
													#N/A	#N/A	#N/A
													#N/A	#N/A	#N/A
													#N/A	#N/A	#N/A
													#N/A	#N/A	#N/A
													#N/A	#N/A	#N/A
													#N/A	#N/A	#N/A
													#N/A	#N/A	#N/A
													#N/A	#N/A	#N/A
													#N/A	#N/A	#N/A
													#N/A	#N/A	#N/A
													#N/A	#N/A	#N/A
													#N/A	#N/A	#N/A
													#N/A	#N/A	#N/A
													#N/A	#N/A	#N/A
													#N/A	#N/A	#N/A
													#N/A	#N/A	#N/A
													#N/A	#N/A	#N/A
													#N/A	#N/A	#N/A
													#N/A	#N/A	#N/A
													#N/A	#N/A	#N/A
													#N/A	#N/A	#N/A
													#N/A	#N/A	#N/A
													#N/A	#N/A	#N/A
													#N/A	#N/A	#N/A
													#N/A	#N/A	#N/A
													#N/A	#N/A	#N/A
													#N/A	#N/A	#N/A
													#N/A	#N/A	#N/A
													#N/A	#N/A	#N/A
													#N/A	#N/A	#N/A
													#N/A	#N/A	#N/A
													#N/A	#N/A	#N/A
													#N/A	#N/A	#N/A
													#N/A	#N/A	#N/A
													#N/A	#N/A	#N/A
													#N/A	#N/A	#N/A
													#N/A	#N/A	#N/A
													#N/A	#N/A	#N/A
													#N/A	#N/A	#N/A
													#N/A	#N/A	#N/A
													#N/A	#N/A	#N/A
													#N/A	#N/A	#N/A
													#N/A	#N/A	#N/A
													#N/A	#N/A	#N/A
													#N/A	#N/A	#N/A
													#N/A	#N/A	#N/A
													#N/A	#N/A	#N/A
													#N/A	#N/A	#N/A
													#N/A	#N/A	#N/A
													#N/A	#N/A	#N/A
													#N/A	#N/A	#N/A
													#N/A	#N/A	#N/A
													#N/A	#N/A	#N/A
													#N/A	#N/A	#N/A
													#N/A	#N/A	#N/A
													#N/A	#N/A	#N/A
													#N/A	#N/A	#N/A
													#N/A	#N/A	#N/A
													#N/A	#N/A	#N/A
													#N/A	#N/A	#N/A
													#N/A	#N/A	#N/A
													#N/A	#N/A	#N/A
													#N/A	#N/A	#N/A
													#N/A	#N/A	#N/A
													#N/A	#N/A	#N/A
													#N/A	#N/A	#N/A
													#N/A	#N/A	#N/A
													#N/A	#N/A	#N/A
													#N/A	#N/A	#N/A
													#N/A	#N/A	#N/A
													#N/A	#N/A	#N/A
													#N/A	#N/A	#N/A
													#N/A	#N/A	#N/A
													#N/A	#N/A	#N/A
													#N/A	#N/A	#N/A
													#N/A	#N/A	#N/A
													#N/A	#N/A	#N/A
													#N/A	#N/A	#N/A
													#N/A	#N/A	#N/A
													#N/A	#N/A	#N/A
													#N/A	#N/A	#N/A
													#N/A	#N/A	#N/A
													#N/A	#N/A	#N/A
													#N/A	#N/A	#N/A
													#N/A	#N/A	#N/A
													#N/A	#N/A	#N/A
													#N/A	#N/A	#N/A
													#N/A	#N/A	#N/A
													#N/A	#N/A	#N/A
													#N/A	#N/A	#N/A
													#N/A	#N/A	#N/A
													#N/A	#N/A	#N/A
													#N/A	#N/A	#N/A
													#N/A	#N/A	#N/A
													#N/A	#N/A	#N/A
													#N/A	#N/A	#N/A
													#N/A	#N/A	#N/A
													#N/A	#N/A	#N/A
													#N/A	#N/A	#N/A
													#N/A	#N/A	#N/A
													#N/A	#N/A	#N/A
													#N/A	#N/A	#N/A
													#N/A	#N/A	#N/A
													#N/A	#N/A	#N/A
													#N/A	#N/A	#N/A
													#N/A	#N/A	#N/A
													#N/A	#N/A	#N/A
													#N/A	#N/A	#N/A
													#N/A	#N/A	#N/A
													#N/A	#N/A	#N/A
													#N/A	#N/A	#N/A
													#N/A	#N/A	#N/A
													#N/A	#N/A	#N/A
													#N/A	#N/A	#N/A
													#N/A	#N/A	#N/A
													#N/A	#N/A	#N/A
													#N/A	#N/A	#N/A
													#N/A	#N/A	#N/A
													#N/A	#N/A	#N/A
													#N/A	#N/A	#N/A
													#N/A	#N/A	#N/A
													#N/A	#N/A	#N/A
													#N/A	#N/A	#N/A
													#N/A	#N/A	#N/A
													#N/A	#N/A	#N/A
													#N/A	#N/A	#N/A
													#N/A	#N/A	#N/A
													#N/A	#N/A	#N/A
													#N/A	#N/A	#N/A
													#N/A	#N/A	#N/A
													#N/A	#N/A	#N/A
													#N/A	#N/A	#N/A
													#N/A	#N/A	#N/A
													#N/A	#N/A	#N/A
													#N/A	#N/A	#N/A
													#N/A	#N/A	#N/A
													#N/A	#N/A	#N/A
													#N/A	#N/A	#N/A
													#N/A	#N/A	#N/A
													#N/A	#N/A	#N/A
													#N/A	#N/A	#N/A
													#N/A	#N/A	#N/A
													#N/A	#N/A	#N/A
													#N/A	#N/A	#N/A
													#N/A	#N/A	#N/A
													#N/A	#N/A	#N/A
													#N/A	#N/A	#N/A
													#N/A	#N/A	#N/A
													#N/A	#N/A	#N/A
													#N/A	#N/A	#N/A
													#N/A	#N/A	#N/A
													#N/A	#N/A	#N/A
													#N/A	#N/A	#N/A
													#N/A	#N/A	#N/A
													#N/A	#N/A	#N/A
													#N/A	#N/A	#N/A
													#N/A	#N/A	#N/A
													#N/A	#N/A	#N/A
													#N/A	#N/A	#N/A
													#N/A	#N/A	#N/A
													#N/A	#N/A	#N/A
													#N/A	#N/A	#N/A
													#N/A	#N/A	#N/A
													#N/A	#N/A	#N/A
													#N/A	#N/A	#N/A
													#N/A	#N/A	#N/A
													#N/A	#N/A	#N/A
													#N/A	#N/A	#N/A
													#N/A	#N/A	#N/A
													#N/A	#N/A	#N/A
													#N/A	#N/A	#N/A
													#N/A	#N/A	#N/A
													#N/A	#N/A	#N/A
													#N/A	#N/A	#N/A
													#N/A	#N/A	#N/A
													#N/A	#N/A	#N/A
													#N/A	#N/A	#N/A
													#N/A	#N/A	#N/A
													#N/A	#N/A	#N/A
													#N/A	#N/A	#N/A
													#N/A	#N/A	#N/A
													#N/A	#N/A	#N/A
													#N/A	#N/A	#N/A
													#N/A	#N/A	#N/A
													#N/A	#N/A	#N/A
													#N/A	#N/A	#N/A
													#N/A	#N/A	#N/A
													#N/A	#N/A	#N/A
													#N/A	#N/A	#N/A
													#N/A	#N/A	#N/A
													#N/A	#N/A	#N/A
													#N/A	#N/A	#N/A
													#N/A	#N/A	#N/A
													#N/A	#N/A	#N/A
													#N/A	#N/A	#N/A
													#N/A	#N/A	#N/A
													#N/A	#N/A	#N/A
													#N/A	#N/A	#N/A
													#N/A	#N/A	#N/A
													#N/A	#N/A	#N/A
													#N/A	#N/A	#N/A
													#N/A	#N/A	#N/A
													#N/A	#N/A	#N/A
													#N/A	#N/A	#N/A
													#N/A	#N/A	#N/A
													#N/A	#N/A	#N/A
													#N/A	#N/A	#N/A
													#N/A	#N/A	#N/A
													#N/A	#N/A	#N/A
													#N/A	#N/A	#N/A
													#N/A	#N/A	#N/A
													#N/A	#N/A	#N/A
													#N/A	#N/A	#N/A
													#N/A	#N/A	#N/A
													#N/A	#N/A	#N/A
													#N/A	#N/A	#N/A
													#N/A	#N/A	#N/A
													#N/A	#N/A	#N/A
													#N/A	#N/A	#N/A
													#N/A	#N/A	#N/A
													#N/A	#N/A	#N/A
													#N/A	#N/A	#N/A
													#N/A	#N/A	#N/A
													#N/A	#N/A	#N/A
													#N/A	#N/A	#N/A
													#N/A	#N/A	#N/A
													#N/A	#N/A	#N/A
													#N/A	#N/A	#N/A
													#N/A	#N/A	#N/A
													#N/A	#N/A	#N/A
													#N/A	#N/A	#N/A
													#N/A	#N/A	#N/A
													#N/A	#N/A	#N/A
													#N/A	#N/A	#N/A
													#N/A	#N/A	#N/A
													#N/A	#N/A	#N/A
													#N/A	#N/A	#N/A
													#N/A	#N/A	#N/A
													#N/A	#N/A	#N/A
													#N/A	#N/A	#N/A
													#N/A	#N/A	#N/A
													#N/A	#N/A	#N/A
													#N/A	#N/A	#N/A
													#N/A	#N/A	#N/A
													#N/A	#N/A	#N/A
													#N/A	#N/A	#N/A
													#N/A	#N/A	#N/A
													#N/A	#N/A	#N/A
													#N/A	#N/A	#N/A
													#N/A	#N/A	#N/A
													#N/A	#N/A	#N/A
													#N/A	#N/A	#N/A
													#N/A	#N/A	#N/A
													#N/A	#N/A	#N/A
													#N/A	#N/A	#N/A
													#N/A	#N/A	#N/A
													#N/A	#N/A	#N/A
													#N/A	#N/A	#N/A
													#N/A	#N/A	#N/A
													#N/A	#N/A	#N/A
													#N/A	#N/A	#N/A
													#N/A	#N/A	#N/A
													#N/A	#N/A	#N/A
													#N/A	#N/A	#N/A
													#N/A	#N/A	#N/A
													#N/A	#N/A	#N/A
													#N/A	#N/A	#N/A
													#N/A	#N/A	#N/A
													#N/A	#N/A	#N/A
													#N/A	#N/A	#N/A
													#N/A	#N/A	#N/A
													#N/A	#N/A	#N/A
													#N/A	#N/A	#N/A
													#N/A	#N/A	#N/A
													#N/A	#N/A	#N/A
													#N/A	#N/A	#N/A
													#N/A	#N/A	#N/A
													#N/A	#N/A	#N/A
													#N/A	#N/A	#N/A
													#N/A	#N/A	#N/A
													#N/A	#N/A	#N/A
													#N/A	#N/A	#N/A
													#N/A	#N/A	#N/A
													#N/A	#N/A	#N/A
													#N/A	#N/A	#N/A
													#N/A	#N/A	#N/A
													#N/A	#N/A	#N/A
													#N/A	#N/A	#N/A
													#N/A	#N/A	#N/A
													#N/A	#N/A	#N/A
													#N/A	#N/A	#N/A
													#N/A	#N/A	#N/A
													#N/A	#N/A	#N/A
													#N/A	#N/A	#N/A
													#N/A	#N/A	#N/A
													#N/A	#N/A	#N/A
													#N/A	#N/A	#N/A
													#N/A	#N/A	#N/A
													#N/A	#N/A	#N/A
													#N/A	#N/A	#N/A
													#N/A	#N/A	#N/A
[truncated: 1,046,576+ more rows]

## Sheet: Sheet1
	0	1	2	3	4	5	6	7	8	9	10	11	12	13
0	1	0.754528	0.601326	0.553402	0.519665	0.474806	0.43382	0.396372	0.362156	0.277705	0.209811	0.177851	0.14704	0.105393
1		0.185215	0.300811	0.324761	0.3387	0.354321	0.364721	0.370686	0.372903	0.370397	0.347736	0.326726	0.300935	0.257347
2			0.0376069	0.0585832	0.0748104	0.0975898	0.119751	0.140898	0.160733	0.210209	0.249373	0.264356	0.275161	0.282461
3				0.00299712	0.00638586	0.0122924	0.0196554	0.0282959	0.0380159	0.0666323	0.101734	0.124224	0.1485	0.184375
4					0.00299712	0.000718183	0.00171729	0.00326575	0.0054264	0.0130259	0.0261318	0.0376482	0.0526466	0.0797956
5						0.00299712	7.64058e-05	0.00021805	0.000481133	0.00163432	0.00441937	0.00772677	0.0129104	0.024165
6							0.00299712	7.83947e-06	2.59852e-05	0.000132121	0.000499383	0.0010965	0.00224514	0.00526589
7								0.00299712	7.841e-07	6.66074e-06	3.73337e-05	0.000107716	0.000279015	0.000835886
8									0.00299712	1.90623e-07	1.77246e-06	7.18941e-06	2.46048e-05	9.66621e-05
9										0.00299712	4.83916e-08	3.11014e-07	1.50263e-06	8.04592e-06
10											0.00299712	7.86165e-09	6.038e-08	4.68873e-07
11												0.00299712	1.4348e-09	1.813e-08
12													0.00299712	4.17322e-10
13														0.00299712
