# Supplementary material for: Probabilistic En Route Sector Traffic Demand Prediction Based upon Statistical Analysis of Error Distribution Characteristics
Source: Hindawi journal article supplement (doi:10.1155/2018/8184513), 2018-08-13
Supplement: f1 [file 8184513.f1.rar › Fig.8 AR03-0700-0714.xlsx]

## Sheet: 0700-0714
CALLSIGN	PASSSECTOR	EINSECTORTIME	EOUTSECTORTIME	OPINSECTORTIME	OPOUTSECTORTIME	ATD	FlyTime	Predicted Time Error ∆ti(in)	Predicted Time Error ∆ti(out)	probability distribution(in)	probability distribution(out)	The probability of the aircraft in AR03	0	0	1
CSN3920	ZGGGAR03	2014-05-01 07:29:22	2014-05-01 07:49:40	2014-05-01 07:06:43	2014-05-01 07:27:01	2014-05-01 06:58:00	1900-01-01 00:08:43	22.65	22.65	0.939696	0.926732	0.0688499	1	0	0.93115
DKH1205	ZGGGAR03	2014-05-01 07:11:17	2014-05-01 07:33:17	2014-05-01 07:07:32	2014-05-01 07:25:01	2014-05-01 06:40:00	1900-01-01 00:27:32	3.75	8.26667	0.343741	0.497844	0.172611	1	1	0.0641096
CES2324	ZGGGAR03	2014-05-01 07:12:38	2014-05-01 07:30:32	2014-05-01 07:09:49	2014-05-01 07:26:41	2014-05-01 07:01:00	1900-01-01 00:08:49	2.81667	3.85	0.308962	0.325315	0.208452	2	0	0.770423
DKH1205	ZGGGAR03	2014-05-02 07:10:17	2014-05-02 07:32:17	2014-05-02 07:06:32	2014-05-02 07:24:01	2014-05-02 06:39:00	1900-01-01 00:27:32	3.75	8.26667	0.343741	0.497844	0.172611	2	2	0.011066
CES2324	ZGGGAR03	2014-05-02 07:12:38	2014-05-02 07:30:32	2014-05-02 07:09:30	2014-05-02 07:25:48	2014-05-02 07:01:00	1900-01-01 00:08:30	3.13333	4.73333	0.320591	0.358157	0.205769	2	1	0.213771
CSN3920	ZGGGAR03	2014-05-03 07:30:22	2014-05-03 07:50:40	2014-05-03 07:10:36	2014-05-03 07:30:54	2014-05-03 06:59:00	1900-01-01 00:11:36	19.7667	19.7667	0.895088	0.876923	0.110164	3	0	0.609827
CES2324	ZGGGAR03	2014-05-03 07:15:38	2014-05-03 07:33:32	2014-05-03 07:13:42	2014-05-03 07:32:17	2014-05-03 07:04:00	1900-01-01 00:09:42	1.93333	1.25	0.277548	0.236899	0.211797	3	3	0.00230674
CES2324	ZGGGAR03	2014-05-04 07:09:38	2014-05-04 07:27:32	2014-05-04 07:07:10	2014-05-04 07:24:44	2014-05-04 06:58:00	1900-01-01 00:09:10	2.46667	2.8	0.296329	0.287989	0.21099	3	1	0.329806
CSN3920	ZGGGAR03	2014-05-04 07:30:22	2014-05-04 07:50:40	2014-05-04 07:10:06	2014-05-04 07:30:24	2014-05-04 06:59:00	1900-01-01 00:11:06	20.2667	20.2667	0.904182	0.886938	0.102229	3	2	0.0533203
CSN3197	ZGGGAR03	2014-05-04 07:11:59	2014-05-04 07:25:50	2014-05-04 07:10:09	2014-05-04 07:26:42	2014-05-04 07:00:00	1900-01-01 00:10:09	1.83333	-0.866667	0.274092	0.175987	0.225856	4	0	0.504563
CSZ9853	ZGGGAR03	2014-05-04 08:00:17	2014-05-04 08:19:41	2014-05-04 07:11:15	2014-05-04 07:30:39	2014-05-04 07:29:00	1899-12-31 23:42:15.000	49.0333	49.0333	0.999991	0.999981	1.854e-05	4	4	0.00039817
OKA2787	ZGGGAR03	2014-05-04 07:15:41	2014-05-04 07:30:09	2014-05-04 07:13:13	2014-05-04 07:29:43	2014-05-04 07:04:00	1900-01-01 00:09:13	2.46667	0.433333	0.296329	0.212129	0.233469	4	1	0.378141
CES2324	ZGGGAR03	2014-05-05 07:14:38	2014-05-05 07:32:32	2014-05-05 07:11:44	2014-05-05 07:28:26	2014-05-05 07:03:00	1900-01-01 00:08:44	2.9	4.1	0.312005	0.334486	0.207643	4	2	0.101045
CSN3920	ZGGGAR03	2014-05-06 07:30:22	2014-05-06 07:50:40	2014-05-06 07:09:12	2014-05-06 07:29:30	2014-05-06 06:59:00	1900-01-01 00:10:12	21.1667	21.1667	0.919068	0.903471	0.0887165	4	3	0.0111123
CES2324	ZGGGAR03	2014-05-06 07:12:38	2014-05-06 07:30:32	2014-05-06 07:10:07	2014-05-06 07:27:37	2014-05-06 07:01:00	1900-01-01 00:09:07	2.51667	2.91667	0.298119	0.292035	0.211058	5	0	0.40074
CSN3920	ZGGGAR03	2014-05-07 07:27:17	2014-05-07 07:46:17	2014-05-07 07:06:33	2014-05-07 07:25:33	2014-05-07 06:56:00	1900-01-01 00:10:33	20.7333	20.7333	0.912134	0.895747	0.0950929	5	5	8.19312e-05
DKH1205	ZGGGAR03	2014-05-07 07:16:17	2014-05-07 07:38:17	2014-05-07 07:12:32	2014-05-07 07:30:01	2014-05-07 06:45:00	1900-01-01 00:27:32	3.75	8.26667	0.343741	0.497844	0.172611	5	1	0.404155
DKH1205	ZGGGAR03	2014-05-08 07:06:17	2014-05-08 07:28:17	2014-05-08 07:02:47	2014-05-08 07:20:55	2014-05-08 06:35:00	1900-01-01 00:27:47	3.5	7.36667	0.334279	0.461526	0.18	5	2	0.158063
CES2324	ZGGGAR03	2014-05-08 07:13:38	2014-05-08 07:31:32	2014-05-08 07:11:04	2014-05-08 07:28:28	2014-05-08 07:02:00	1900-01-01 00:09:04	2.56667	3.06667	0.299914	0.297276	0.210757	5	3	0.0296176
CSN3920	ZGGGAR03	2014-05-08 07:35:22	2014-05-08 07:55:40	2014-05-08 07:13:04	2014-05-08 07:33:22	2014-05-08 07:04:00	1900-01-01 00:09:04	22.3	22.3	0.935244	0.921673	0.0732551	5	4	0.0026028
CSN3197	ZGGGAR03	2014-05-09 07:10:59	2014-05-09 07:24:50	2014-05-09 07:07:38	2014-05-09 07:22:59	2014-05-09 06:59:00	1900-01-01 00:08:38	3.35	1.85	0.328651	0.256066	0.244495	6	0	0.356592
YZR7995	ZGGGAR03	2014-05-10 07:27:23	2014-05-10 07:46:23	2014-05-10 07:10:45	2014-05-10 07:29:45	2014-05-10 06:56:00	1900-01-01 00:14:45	16.6333	16.6333	0.823821	0.800185	0.164612	6	6	9.02591e-06
CES2324	ZGGGAR03	2014-05-10 07:15:38	2014-05-10 07:33:32	2014-05-10 07:11:21	2014-05-10 07:25:29	2014-05-10 07:04:00	1900-01-01 00:07:21	4.28333	8.05	0.36425	0.489088	0.1861	6	1	0.403779
CES2324	ZGGGAR03	2014-05-11 07:05:38	2014-05-11 07:23:32	2014-05-11 07:02:59	2014-05-11 07:20:13	2014-05-11 06:54:00	1900-01-01 00:08:59	2.65	3.31667	0.302917	0.306104	0.210193	6	2	0.185173
CSN3920	ZGGGAR03	2014-05-11 07:30:22	2014-05-11 07:50:40	2014-05-11 07:12:07	2014-05-11 07:32:25	2014-05-11 06:59:00	1900-01-01 00:13:07	18.25	18.25	0.863725	0.842811	0.135768	6	3	0.0437677
CSN3197	ZGGGAR03	2014-05-11 07:14:59	2014-05-11 07:28:50	2014-05-11 07:13:04	2014-05-11 07:31:41	2014-05-11 07:03:00	1900-01-01 00:10:04	1.91667	-2.85	0.276971	0.128878	0.241275	6	4	0.00557888
CSN3920	ZGGGAR03	2014-05-12 07:24:22	2014-05-12 07:44:40	2014-05-12 07:04:13	2014-05-12 07:24:31	2014-05-12 06:53:00	1900-01-01 00:11:13	20.15	20.15	0.902114	0.884655	0.104055	6	5	0.000359642
CES2324	ZGGGAR03	2014-05-12 07:13:38	2014-05-12 07:31:32	2014-05-12 07:10:11	2014-05-12 07:25:55	2014-05-12 07:02:00	1900-01-01 00:08:11	3.45	5.61667	0.332399	0.392083	0.202071	7	0	0.281067
CSN3197	ZGGGAR03	2014-05-13 07:05:59	2014-05-13 07:19:50	2014-05-13 07:03:41	2014-05-13 07:21:13	2014-05-13 06:54:00	1900-01-01 00:09:41	2.3	-1.38333	0.290398	0.162776	0.243128	7	7	1.91166e-06
CES2324	ZGGGAR03	2014-05-13 07:13:38	2014-05-13 07:31:32	2014-05-13 07:10:28	2014-05-13 07:26:43	2014-05-13 07:02:00	1900-01-01 00:08:28	3.16667	4.81667	0.321826	0.361314	0.205546	7	1	0.393785
CSN3920	ZGGGAR03	2014-05-13 07:30:22	2014-05-13 07:50:40	2014-05-13 07:11:11	2014-05-13 07:31:29	2014-05-13 06:59:00	1900-01-01 00:12:11	19.1833	19.1833	0.883707	0.864474	0.119766	7	2	0.231473
DKH1205	ZGGGAR03	2014-05-13 07:14:17	2014-05-13 07:36:17	2014-05-13 07:11:44	2014-05-13 07:32:02	2014-05-13 06:43:00	1900-01-01 00:28:44	2.55	4.25	0.299316	0.340038	0.197537	7	3	0.073717
DKH1205	ZGGGAR03	2014-05-14 07:10:17	2014-05-14 07:32:17	2014-05-14 07:06:32	2014-05-14 07:24:01	2014-05-14 06:39:00	1900-01-01 00:27:32	3.75	8.26667	0.343741	0.497844	0.172611	7	4	0.0136672
CSN3197	ZGGGAR03	2014-05-14 06:58:06	2014-05-14 07:12:06	2014-05-14 07:07:22	2014-05-14 07:25:59	2014-05-14 06:58:00	1900-01-01 00:09:22	-9.26667	-13.8833	0.0402006	0.0122379	0.0397087	7	5	0.00146506
CSS6879	ZGGGAR03	2014-05-15 07:18:23	2014-05-15 07:37:23	2014-05-15 07:01:21	2014-05-15 07:20:21	2014-05-15 06:47:00	1900-01-01 00:14:21	17.0333	17.0333	0.834323	0.81133	0.157411	7	6	8.32853e-05
CSN3920	ZGGGAR03	2014-05-15 07:25:22	2014-05-15 07:45:40	2014-05-15 07:04:52	2014-05-15 07:25:10	2014-05-15 06:54:00	1900-01-01 00:10:52	20.5	20.5	0.908222	0.891406	0.098627	8	0	0.221765
DKH1205	ZGGGAR03	2014-05-15 07:12:17	2014-05-15 07:34:17	2014-05-15 07:08:56	2014-05-15 07:27:22	2014-05-15 06:41:00	1900-01-01 00:27:56	3.35	6.91667	0.328651	0.443468	0.182905	8	8	4.03341e-07
CES2324	ZGGGAR03	2014-05-15 07:15:38	2014-05-15 07:33:32	2014-05-15 07:12:44	2014-05-15 07:29:26	2014-05-15 07:04:00	1900-01-01 00:08:44	2.9	4.1	0.312005	0.334486	0.207643	8	1	0.370002
CSN3197	ZGGGAR03	2014-05-16 07:10:59	2014-05-16 07:24:50	2014-05-16 07:08:04	2014-05-16 07:24:28	2014-05-16 06:59:00	1900-01-01 00:09:04	2.91667	0.366667	0.312615	0.210177	0.24691	8	2	0.265719
CES2324	ZGGGAR03	2014-05-16 07:16:38	2014-05-16 07:34:32	2014-05-16 07:13:34	2014-05-16 07:30:01	2014-05-16 07:05:00	1900-01-01 00:08:34	3.06667	4.51667	0.318128	0.349992	0.206786	8	3	0.107002
CES2324	ZGGGAR03	2014-05-17 07:12:38	2014-05-17 07:30:32	2014-05-17 07:09:11	2014-05-17 07:24:55	2014-05-17 07:01:00	1900-01-01 00:08:11	3.45	5.61667	0.332399	0.392083	0.202071	8	4	0.0263371
CSN3920	ZGGGAR03	2014-05-18 07:24:22	2014-05-18 07:44:40	2014-05-18 07:07:37	2014-05-18 07:27:55	2014-05-18 06:53:00	1900-01-01 00:14:37	16.75	16.75	0.826926	0.803476	0.162511	8	5	0.00403958
DKH1205	ZGGGAR03	2014-05-18 07:13:17	2014-05-18 07:35:17	2014-05-18 07:09:56	2014-05-18 07:28:22	2014-05-18 06:42:00	1900-01-01 00:27:56	3.35	6.91667	0.328651	0.443468	0.182905	8	6	0.000374826
CES2324	ZGGGAR03	2014-05-20 07:12:38	2014-05-20 07:30:32	2014-05-20 07:09:49	2014-05-20 07:26:44	2014-05-20 07:01:00	1900-01-01 00:08:49	2.81667	3.8	0.308962	0.323493	0.209015	8	7	1.90807e-05
CSN3197	ZGGGAR03	2014-05-20 07:14:59	2014-05-20 07:28:50	2014-05-20 07:13:16	2014-05-20 07:32:20	2014-05-20 07:03:00	1900-01-01 00:10:16	1.71667	-3.5	0.270088	0.115543	0.238881	9	0	0.199094
CES2324	ZGGGAR03	2014-05-21 07:15:38	2014-05-21 07:33:32	2014-05-21 07:13:13	2014-05-21 07:30:52	2014-05-21 07:04:00	1900-01-01 00:09:13	2.41667	2.66667	0.294544	0.283397	0.211071	9	9	4.12331e-08
CSN3920	ZGGGAR03	2014-05-22 07:27:22	2014-05-22 07:47:40	2014-05-22 07:07:50	2014-05-22 07:28:08	2014-05-22 06:56:00	1900-01-01 00:11:50	19.5333	19.5333	0.890637	0.872043	0.113963	9	1	0.354848
CES2324	ZGGGAR03	2014-05-22 07:12:38	2014-05-22 07:30:32	2014-05-22 07:09:55	2014-05-22 07:27:02	2014-05-22 07:01:00	1900-01-01 00:08:55	2.71667	3.5	0.305329	0.312651	0.209867	9	2	0.27638
DKH1205	ZGGGAR03	2014-05-23 07:11:17	2014-05-23 07:33:17	2014-05-23 07:07:24	2014-05-23 07:24:35	2014-05-23 06:40:00	1900-01-01 00:27:24	3.88333	8.7	0.348828	0.515356	0.169057	9	3	0.123227
CSN3920	ZGGGAR03	2014-05-24 07:27:22	2014-05-24 07:47:40	2014-05-24 07:09:16	2014-05-24 07:29:34	2014-05-24 06:56:00	1900-01-01 00:13:16	18.1	18.1	0.860306	0.839128	0.138399	9	4	0.0345834
DKH1205	ZGGGAR03	2014-05-24 07:16:17	2014-05-24 07:38:17	2014-05-24 07:13:05	2014-05-24 07:31:50	2014-05-24 06:45:00	1900-01-01 00:28:05	3.2	6.45	0.323063	0.424865	0.185805	9	5	0.00631903
CSN465	ZGGGAR03	2014-05-24 07:05:06	2014-05-24 07:19:06	2014-05-24 07:13:09	2014-05-24 07:26:27	2014-05-24 07:05:00	1900-01-01 00:08:09	-8.05	-7.35	0.0523435	0.056184	0.0494026	9	6	0.00074947
CSN3197	ZGGGAR03	2014-05-25 07:10:59	2014-05-25 07:24:50	2014-05-25 07:07:56	2014-05-25 07:25:28	2014-05-25 06:59:00	1900-01-01 00:08:56	3.05	-0.633333	0.317513	0.18217	0.259672	9	7	5.54481e-05
CES2324	ZGGGAR03	2014-05-26 07:14:38	2014-05-26 07:32:32	2014-05-26 07:11:22	2014-05-26 07:27:25	2014-05-26 07:03:00	1900-01-01 00:08:22	3.26667	5.11667	0.325542	0.37276	0.204193	9	8	2.3127e-06
DKH1205	ZGGGAR03	2014-05-27 07:10:17	2014-05-27 07:32:17	2014-05-27 07:06:40	2014-05-27 07:24:28	2014-05-27 06:39:00	1900-01-01 00:27:40	3.61667	7.81667	0.338682	0.479664	0.176228	10	0	0.154128
CSN3197	ZGGGAR03	2014-05-27 07:01:06	2014-05-27 07:15:06	2014-05-27 07:10:27	2014-05-27 07:27:17	2014-05-27 07:01:00	1900-01-01 00:09:27	-9.35	-12.1833	0.0394606	0.0188852	0.0387154	10	10	9.31273e-09
CSN3920	ZGGGAR03	2014-05-28 07:19:22	2014-05-28 07:39:40	2014-05-28 07:01:04	2014-05-28 07:21:22	2014-05-28 06:48:00	1900-01-01 00:13:04	18.3	18.3	0.864851	0.844026	0.134894	10	1	0.31967
CES2324	ZGGGAR03	2014-05-28 07:10:38	2014-05-28 07:28:32	2014-05-28 07:08:25	2014-05-28 07:26:27	2014-05-28 06:59:00	1900-01-01 00:09:25	2.21667	2.08333	0.287453	0.263732	0.211642	10	2	0.294103
DKH1205	ZGGGAR03	2014-05-28 07:14:17	2014-05-28 07:36:17	2014-05-28 07:11:05	2014-05-28 07:29:50	2014-05-28 06:43:00	1900-01-01 00:28:05	3.2	6.45	0.323063	0.424865	0.185805	10	3	0.157818
DKH1205	ZGGGAR03	2014-05-30 07:10:17	2014-05-30 07:32:17	2014-05-30 07:06:32	2014-05-30 07:24:01	2014-05-30 06:39:00	1900-01-01 00:27:32	3.75	8.26667	0.343741	0.497844	0.172611	10	4	0.0546041
CSN3920	ZGGGAR03	2014-05-30 07:25:22	2014-05-30 07:45:40	2014-05-30 07:08:39	2014-05-30 07:28:57	2014-05-30 06:54:00	1900-01-01 00:14:39	16.7167	16.7167	0.826043	0.802539	0.163111	10	5	0.0127027
CES2324	ZGGGAR03	2014-05-30 07:14:38	2014-05-30 07:32:32	2014-05-30 07:10:46	2014-05-30 07:25:39	2014-05-30 07:03:00	1900-01-01 00:07:46	3.86667	6.88333	0.348191	0.442135	0.194243	10	6	0.00200739
								9.66816	9.87095				10	7	0.000212197
													10	8	1.43136e-05
													10	9	5.54257e-07
													11	0	0.154125
													11	11	1.72658e-13
													11	1	0.319667
													11	2	0.294103
													11	3	0.15782
													11	4	0.054606
													11	5	0.0127035
													11	6	0.00200758
													11	7	0.00021223
													11	8	1.43173e-05
													11	9	5.54513e-07
													11	10	9.32283e-09
													12	0	0.118141
													12	12	4.03102e-14
													12	1	0.281018
													12	2	0.300072
													12	3	0.189638
													12	4	0.0787034
													12	5	0.0224864
													12	6	0.00450474
													12	7	0.000631389
													12	8	6.05238e-05
													12	9	3.7677e-06
													12	10	1.36608e-07
													12	11	2.17672e-09
													13	0	0.0936101
													13	13	8.37015e-15
													13	1	0.247198
													13	2	0.296115
													13	3	0.212569
													13	4	0.101738
													13	5	0.0341595
													13	6	0.00823852
													13	7	0.00143567
													13	8	0.00017906
													13	9	1.55527e-05
													13	10	8.90579e-07
													13	11	3.00904e-08
													13	12	4.52014e-10
													14	0	0.0853054
													14	14	7.4257e-16
													14	1	0.233572
													14	2	0.291775
													14	3	0.219981
													14	4	0.111571
													14	5	0.0401548
													14	6	0.0105381
													14	7	0.00203919
													14	8	0.000290542
													14	9	3.00585e-05
													14	10	2.19135e-06
													14	11	1.0643e-07
													14	12	3.08143e-09
													14	13	4.01087e-11
													15	0	0.067301
													15	15	1.56725e-16
													15	1	0.202279
													15	2	0.279491
													15	3	0.235134
													15	4	0.134452
													15	5	0.0552278
													15	6	0.016789
													15	7	0.00383296
													15	8	0.000659608
													15	9	8.50356e-05
													15	10	8.07295e-06
													15	11	5.4647e-07
													15	12	2.4894e-08
													15	13	6.82004e-10
													15	14	8.46586e-12
													16	0	0.0609011
													16	16	1.49035e-17
													16	1	0.189444
													16	2	0.272149
													16	3	0.239352
													16	4	0.144026
													16	5	0.0627614
													16	6	0.0204442
													16	7	0.00506499
													16	8	0.000961372
													16	9	0.000139673
													16	10	1.53916e-05
													16	11	1.26218e-06
													16	12	7.44921e-08
													16	13	2.98439e-09
													16	14	7.25146e-11
													16	15	8.05185e-13
													17	0	0.0503889
													17	17	2.57251e-18
													17	1	0.167256
													17	2	0.257873
													17	3	0.245013
													17	4	0.16048
													17	5	0.0767885
													17	6	0.0277487
													17	7	0.00771962
													17	8	0.0016697
													17	9	0.000281508
													17	10	3.6844e-05
													17	11	3.70107e-06
													17	12	2.79501e-07
													17	13	1.53274e-08
													17	14	5.75138e-10
													17	15	1.3183e-11
													17	16	1.38996e-13
													18	0	0.0413189
													18	18	4.63053e-19
													18	1	0.14622
													18	2	0.241562
													18	3	0.247328
													18	4	0.175696
													18	5	0.0918531
													18	6	0.0365759
													18	7	0.0113249
													18	8	0.00275869
													18	9	0.000531383
													18	10	8.08836e-05
													18	11	9.66682e-06
													18	12	8.95386e-07
													18	13	6.28788e-08
													18	14	3.23056e-09
													18	15	1.14335e-10
													18	16	2.48693e-12
													18	17	2.50215e-14
													19	0	0.0326106
													19	19	9.75917e-20
													19	1	0.124111
													19	2	0.221468
													19	3	0.246113
													19	4	0.190793
													19	5	0.109524
													19	6	0.0482259
													19	7	0.0166467
													19	8	0.00456407
													19	9	0.0010008
													19	10	0.00017583
													19	11	2.46763e-05
													19	12	2.74403e-06
													19	13	2.38336e-07
													19	14	1.58019e-08
													19	15	7.71101e-10
													19	16	2.60597e-11
													19	17	5.43886e-13
													19	18	5.27383e-15
													20	0	0.0302217
													20	20	7.14909e-21
													20	1	0.117408
													20	2	0.214336
													20	3	0.244307
													20	4	0.194845
													20	5	0.115477
													20	6	0.0527163
													20	7	0.01896
													20	8	0.00544918
													20	9	0.00126183
													20	10	0.000236263
													20	11	3.5749e-05
													20	12	4.35068e-06
													20	13	4.2189e-07
													20	14	3.21036e-08
													20	15	1.87218e-09
													20	16	8.06378e-11
													20	17	2.41305e-12
													20	18	4.47299e-14
													20	19	3.86425e-16
													21	0	0.0228327
													21	21	1.74792e-21
													21	1	0.0960916
													21	2	0.190638
													21	3	0.236979
													21	4	0.206939
													21	5	0.134882
													21	6	0.068061
													21	7	0.0272133
													21	8	0.00875252
													21	9	0.00228562
													21	10	0.00048701
													21	11	8.47737e-05
													21	12	1.20274e-05
													21	13	1.38246e-06
													21	14	1.27405e-07
													21	15	9.26361e-09
													21	16	5.18661e-10
													21	17	2.15386e-11
													21	18	6.23773e-13
													21	19	1.12282e-14
													21	20	9.44845e-17
													22	0	0.0190742
													22	22	2.87727e-22
													22	1	0.0840323
													22	2	0.175074
													22	3	0.229351
													22	4	0.211884
													22	5	0.146743
													22	6	0.0790605
													22	7	0.0339373
													22	8	0.0117914
													22	9	0.00335014
													22	10	0.000783081
													22	11	0.000150986
													22	12	2.40023e-05
													22	13	3.13474e-06
													22	14	3.34001e-07
													22	15	2.8711e-08
													22	16	1.95818e-09
													22	17	1.03371e-10
													22	18	4.0666e-12
													22	19	1.1206e-13
													22	20	1.92722e-15
													22	21	1.55547e-17
													23	0	0.0155245
													23	23	5.35459e-23
													23	1	0.0719436
													23	2	0.158131
													23	3	0.21925
													23	4	0.215134
													23	5	0.158866
													23	6	0.0916563
													23	7	0.0423347
													23	8	0.0159127
													23	9	0.00492105
													23	10	0.00126081
													23	11	0.000268619
													23	12	4.7634e-05
													23	13	7.01819e-06
													23	14	8.55218e-07
													23	15	8.55253e-08
													23	16	6.93687e-09
													23	17	4.4855e-10
													23	18	2.25471e-11
													23	19	8.47998e-13
													23	20	2.24229e-14
													23	21	3.71315e-16
													23	22	2.89496e-18
													24	0	0.0122613
													24	24	1.1255e-23
													24	1	0.0600847
													24	2	0.140015
													24	3	0.206403
													24	4	0.215999
													24	5	0.170693
													24	6	0.105783
													24	7	0.0527017
													24	8	0.0214664
													24	9	0.00723142
													24	10	0.00203017
													24	11	0.000477171
													24	12	9.40835e-05
													24	13	1.55553e-05
													24	14	2.15063e-06
													24	15	2.47309e-07
													24	16	2.34556e-08
													24	17	1.81235e-09
													24	18	1.1209e-10
													24	19	5.40899e-12
													24	20	1.95953e-13
													24	21	5.0064e-15
													24	22	8.03343e-17
													24	23	6.08542e-19
													25	0	0.0105966
													25	25	1.52806e-24
													25	1	0.0535919
													25	2	0.129163
													25	3	0.19739
													25	4	0.214697
													25	5	0.176844
													25	6	0.114596
													25	7	0.0599085
													25	8	0.0257072
													25	9	0.00916408
													25	10	0.00273633
													25	11	0.000688018
													25	12	0.000146094
													25	13	2.62169e-05
													25	14	3.97056e-06
													25	15	5.05719e-07
													25	16	5.38477e-08
													25	17	4.75081e-09
													25	18	3.4293e-10
													25	19	1.98928e-11
													25	20	9.03715e-13
													25	21	3.09308e-14
													25	22	7.49136e-16
													25	23	1.14327e-17
													25	24	8.26301e-20
													26	0	0.00803993
													26	26	3.68684e-25
													26	1	0.0432182
													26	2	0.11093
													26	3	0.180929
													26	4	0.210521
													26	5	0.185977
													26	6	0.129615
													26	7	0.0731032
													26	8	0.0339591
													26	9	0.0131555
													26	10	0.00428719
													26	11	0.00118222
													26	12	0.000276847
													26	13	5.51404e-05
													26	14	9.33806e-06
													26	15	1.3417e-06
													26	16	1.62873e-07
													26	17	1.65967e-08
													26	18	1.40644e-09
													26	19	9.78337e-11
													26	20	5.48532e-12
													26	21	2.41512e-13
													26	22	8.03122e-15
													26	23	1.89422e-16
													26	24	2.82113e-18
													26	25	1.99378e-20
													27	0	0.00720334
													27	27	3.83633e-26
													27	1	0.0395577
													27	2	0.103884
													27	3	0.173645
													27	4	0.207442
													27	5	0.188531
													27	6	0.13548
													27	7	0.0789835
													27	8	0.0380322
													27	9	0.0153202
													27	10	0.00520998
													27	11	0.00150531
													27	12	0.000371056
													27	13	7.821e-05
													27	14	1.4104e-05
													27	15	2.17376e-06
													27	16	2.85535e-07
													27	17	3.18174e-08
													27	18	2.98706e-09
													27	19	2.34e-10
													27	20	1.50946e-11
													27	21	7.87154e-13
													27	22	3.2326e-14
													27	23	1.0054e-15
													27	24	2.22378e-17
													27	25	3.11415e-19
													27	26	2.07495e-21
													28	0	0.00574775
													28	28	7.7521e-27
													28	1	0.0330198
													28	2	0.0908856
													28	3	0.159548
													28	4	0.200612
													28	5	0.192352
													28	6	0.1462
													28	7	0.0903998
													28	8	0.0463073
													28	9	0.0199097
													28	10	0.00725296
													28	11	0.00225392
													28	12	0.000600256
													28	13	0.000137386
													28	14	2.7058e-05
													28	15	4.58451e-06
													28	16	6.6709e-07
													28	17	8.30864e-08
													28	18	8.81283e-09
													28	19	7.90313e-10
													28	20	5.93291e-11
													28	21	3.67827e-12
													28	22	1.84855e-13
													28	23	7.33438e-15
													28	24	2.20906e-16
													28	25	4.74211e-18
													28	26	6.45835e-20
													28	27	4.19317e-22
													29	0	0.00435031
													29	29	1.88475e-27
													29	1	0.0263892
													29	2	0.0768168
													29	3	0.142854
													29	4	0.190629
													29	5	0.194361
													29	6	0.157421
													29	7	0.103966
													29	8	0.0570274
													29	9	0.0263277
													29	10	0.0103302
													29	11	0.00346932
													29	12	0.00100231
													29	13	0.000249922
													29	14	5.38817e-05
													29	15	1.00484e-05
													29	16	1.61953e-06
													29	17	2.25074e-07
													29	18	2.68708e-08
													29	19	2.74081e-09
													29	20	2.37052e-10
													29	21	1.72085e-11
													29	22	1.0342e-12
													29	23	5.04946e-14
													29	24	1.95039e-15
													29	25	5.72976e-17
													29	26	1.20182e-18
													29	27	1.60194e-20
													29	28	1.01954e-22
													30	0	0.00345613
													30	30	3.87402e-28
													30	1	0.0218592
													30	2	0.0664517
													30	3	0.129281
													30	4	0.180809
													30	5	0.193593
													30	6	0.165014
													30	7	0.114954
													30	8	0.0666755
													30	9	0.0326379
													30	10	0.0136184
													30	11	0.00487954
													30	12	0.00150939
													30	13	0.000404572
													30	14	9.4177e-05
													30	15	1.90582e-05
													30	16	3.35205e-06
													30	17	5.11697e-07
													30	18	6.76106e-08
													30	19	7.70063e-09
													30	20	7.51688e-10
													30	21	6.23963e-11
													30	22	4.35877e-12
													30	23	2.52691e-13
													30	24	1.19284e-14
													30	25	4.46414e-16
													30	26	1.27321e-17
													30	27	2.59756e-19
													30	28	3.37372e-21
													30	29	2.09576e-23
													31	0	0.0030422
													31	31	4.63975e-29
													31	1	0.0196552
													31	2	0.061111
													31	3	0.121756
													31	4	0.174638
													31	5	0.192062
													31	6	0.168436
													31	7	0.120949
													31	8	0.0724576
													31	9	0.0367144
													31	10	0.0158963
													31	11	0.00592615
													31	12	0.00191302
													31	13	0.000536891
													31	14	0.000131352
													31	15	2.80548e-05
													31	16	5.2331e-06
													31	17	8.51874e-07
													31	18	1.20797e-07
													31	19	1.48758e-08
													31	20	1.58393e-09
													31	21	1.4495e-10
													31	22	1.13097e-11
													31	23	7.44458e-13
													31	24	4.07636e-14
													31	25	1.82157e-15
													31	26	6.46723e-17
													31	27	1.75351e-18
													31	28	3.40795e-20
													31	29	4.22503e-22
													31	30	2.51034e-24
													32	0	0.00244125
													32	32	9.16522e-30
													32	1	0.0163735
													32	2	0.052922
													32	3	0.109776
													32	4	0.164191
													32	5	0.18862
													32	6	0.173103
													32	7	0.13033
													32	8	0.0820364
													32	9	0.043775
													32	10	0.0200086
													32	11	0.00789562
													32	12	0.00270576
													32	13	0.000808727
													32	14	0.000211461
													32	15	4.84598e-05
													32	16	9.74124e-06
													32	17	1.71733e-06
													32	18	2.65212e-07
													32	19	3.57991e-08
													32	20	4.20956e-09
													32	21	4.29202e-10
													32	22	3.77085e-11
													32	23	2.83148e-12
													32	24	1.79769e-13
													32	25	9.51405e-15
													32	26	4.11724e-16
													32	27	1.41823e-17
													32	28	3.7373e-19
													32	29	7.071e-21
													32	30	8.54745e-23
													32	31	4.95922e-25
													33	0	0.00201987
													33	33	1.58202e-30
													33	1	0.0139686
													33	2	0.0466133
													33	3	0.0999626
													33	4	0.154799
													33	5	0.184404
													33	6	0.175782
													33	7	0.137713
													33	8	0.0903724
													33	9	0.0503794
													33	10	0.024111
													33	11	0.00998646
													33	12	0.00360159
													33	13	0.00113618
													33	14	0.000314556
													33	15	7.65956e-05
													33	16	1.64245e-05
													33	17	3.10235e-06
													33	18	5.15864e-07
													33	19	7.53983e-08
													33	20	9.66228e-09
													33	21	1.08174e-09
													33	22	1.05285e-10
													33	23	8.85166e-12
													33	24	6.37484e-13
													33	25	3.8902e-14
													33	26	1.98289e-15
													33	27	8.28025e-17
													33	28	2.75725e-18
													33	29	7.03606e-20
													33	30	1.29126e-21
													33	31	1.51642e-23
													33	32	8.56095e-26
													34	0	0.00193966
													34	34	6.28199e-32
													34	1	0.0134942
													34	2	0.045317
													34	3	0.0978442
													34	4	0.152621
													34	5	0.183228
													34	6	0.176124
													34	7	0.139225
													34	8	0.0922522
													34	9	0.0519674
													34	10	0.025154
													34	11	0.0105473
													34	12	0.00385512
													34	13	0.00123408
													34	14	0.000347181
													34	15	8.60446e-05
													34	16	1.88138e-05
													34	17	3.63135e-06
													34	18	6.18569e-07
													34	19	9.28886e-08
													34	20	1.22726e-08
													34	21	1.42246e-09
													34	22	1.44058e-10
													34	23	1.26809e-11
													34	24	9.63658e-13
													34	25	6.26709e-14
													34	26	3.4489e-15
													34	27	1.58252e-16
													34	28	5.93573e-18
													34	29	1.77053e-19
													34	30	4.0339e-21
													34	31	6.5836e-23
													34	32	6.8436e-25
													34	33	3.40096e-27
													35	0	0.00163433
													35	35	9.88857e-33
													35	1	0.0116754
													35	2	0.0403077
													35	3	0.0895758
													35	4	0.143999
													35	5	0.17841
													35	6	0.177242
													35	7	0.145033
													35	8	0.0996462
													35	9	0.0583087
													35	10	0.0293748
													35	11	0.0128466
													35	12	0.00490855
													35	13	0.00164666
													35	14	0.000486788
													35	15	0.00012715
													35	16	2.93967e-05
													35	17	6.02124e-06
													35	18	1.09282e-06
													35	19	1.75637e-07
													35	20	2.49624e-08
													35	21	3.13039e-09
													35	22	3.45293e-10
													35	23	3.33612e-11
													35	24	2.80808e-12
													35	25	2.04496e-13
													35	26	1.27711e-14
													35	27	6.76237e-16
													35	28	2.99121e-17
													35	29	1.08353e-18
													35	30	3.12691e-20
													35	31	6.90455e-22
													35	32	1.094e-23
													35	33	1.10592e-25
													35	34	5.35402e-28
													36	0	0.00147315
													36	36	9.7528e-34
													36	1	0.010685
													36	2	0.0374838
													36	3	0.0847167
													36	4	0.138631
													36	5	0.175016
													36	6	0.177358
													36	7	0.14821
													36	8	0.104123
													36	9	0.0623857
													36	10	0.0322284
													36	11	0.0144767
													36	12	0.00569146
													36	13	0.00196837
													36	14	0.000601183
													36	15	0.00016262
													36	16	3.90379e-05
													36	17	8.32669e-06
													36	18	1.57889e-06
													36	19	2.66095e-07
													36	20	3.9823e-08
													36	21	5.28362e-09
													36	22	6.19979e-10
													36	23	6.41261e-11
													36	24	5.82144e-12
													36	25	4.6128e-13
													36	26	3.16804e-14
													36	27	1.86912e-15
													36	28	9.36572e-17
													36	29	3.92681e-18
													36	30	1.35051e-19
													36	31	3.70633e-21
													36	32	7.79585e-23
													36	33	1.17866e-24
													36	34	1.13899e-26
													36	35	5.2814e-29
													37	0	0.0012037
													37	37	1.78384e-34
													37	1	0.00900014
													37	2	0.0325822
													37	3	0.0760775
													37	4	0.12877
													37	5	0.168361
													37	6	0.176929
													37	7	0.153541
													37	8	0.112186
													37	9	0.0700196
													37	10	0.0377444
													37	11	0.0177236
													37	12	0.00729832
													37	13	0.00264934
													37	14	0.000851248
													37	15	0.000242836
													37	16	6.16417e-05
													37	17	1.39439e-05
													37	18	2.8131e-06
													37	19	5.06212e-07
													37	20	8.12093e-08
													37	21	1.1601e-08
													37	22	1.47298e-09
													37	23	1.65794e-10
													37	24	1.64856e-11
													37	25	1.44168e-12
													37	26	1.10256e-13
													37	27	7.32175e-15
													37	28	4.18398e-16
													37	29	2.03389e-17
													37	30	8.28582e-19
													37	31	2.77299e-20
													37	32	7.41606e-22
													37	33	1.52221e-23
													37	34	2.2489e-25
													37	35	2.12642e-27
													37	36	9.66074e-30
													38	0	0.000953759
													38	38	3.70402e-35
													38	1	0.00738126
													38	2	0.0276855
													38	3	0.067046
													38	4	0.117829
													38	5	0.16014
													38	6	0.17515
													38	7	0.158397
													38	8	0.120773
													38	9	0.0787752
													38	10	0.0444461
													38	11	0.0218808
													38	12	0.00946306
													38	13	0.00361467
													38	14	0.00122461
													38	15	0.000369168
													38	16	9.92655e-05
													38	17	2.38481e-05
													38	18	5.12434e-06
													38	19	9.85222e-07
													38	20	1.69458e-07
													38	21	2.60547e-08
													38	22	3.57601e-09
													38	23	4.37223e-10
													38	24	4.74886e-11
													38	25	4.56546e-12
													38	26	3.86718e-13
													38	27	2.86955e-14
													38	28	1.85183e-15
													38	29	1.02993e-16
													38	30	4.87978e-18
													38	31	1.94022e-19
													38	32	6.34555e-21
													38	33	1.66051e-22
													38	34	3.33896e-24
													38	35	4.83817e-26
													38	36	4.49193e-28
													38	37	2.00613e-30
													39	0	0.000718266
													39	39	9.14561e-36
													39	1	0.00579424
													39	2	0.0226722
													39	3	0.0573275
													39	4	0.10529
													39	5	0.149693
													39	6	0.171444
													39	7	0.162534
													39	8	0.130063
													39	9	0.089145
													39	10	0.0529223
													39	11	0.0274524
													39	12	0.0125291
													39	13	0.0050587
													39	14	0.00181474
													39	15	0.000580386
													39	16	0.000165907
													39	17	4.24694e-05
													39	18	9.74742e-06
													39	19	2.00721e-06
													39	20	3.70879e-07
													39	21	6.14626e-08
													39	22	9.12624e-09
													39	23	1.21222e-09
													39	24	1.43718e-10
													39	25	1.51636e-11
													39	26	1.41849e-12
													39	27	1.17095e-13
													39	28	8.4798e-15
													39	29	5.348e-16
													39	30	2.9105e-17
													39	31	1.35098e-18
													39	32	5.26847e-20
													39	33	1.69183e-21
													39	34	4.35143e-23
													39	35	8.60859e-25
													39	36	1.22842e-26
													39	37	1.12421e-28
													39	38	4.95362e-31
													40	0	0.000569739
													40	40	1.89118e-36
													40	1	0.0047446
													40	2	0.0191821
													40	3	0.0501613
													40	4	0.095372
													40	5	0.140511
													40	6	0.166946
													40	7	0.164376
													40	8	0.136778
													40	9	0.0976063
													40	10	0.0604126
													40	11	0.0327192
													40	12	0.015615
													40	13	0.00660348
													40	14	0.00248554
													40	15	0.000835633
													40	16	0.000251616
													40	17	6.79946e-05
													40	18	1.65139e-05
													40	19	3.60778e-06
													40	20	7.09249e-07
													40	21	1.25445e-07
													40	22	1.99487e-08
													40	23	2.84873e-09
													40	24	3.64669e-10
													40	25	4.17469e-11
													40	26	4.26079e-12
													40	27	3.86206e-13
													40	28	3.09399e-14
													40	29	2.17771e-15
													40	30	1.33676e-16
													40	31	7.09012e-18
													40	32	3.21155e-19
													40	33	1.22364e-20
													40	34	3.84363e-22
													40	35	9.68097e-24
													40	36	1.87757e-25
													40	37	2.62938e-27
													40	38	2.364e-29
													40	39	1.02441e-31
													41	0	0.000454611
													41	41	3.82153e-37
													41	1	0.00390098
													41	2	0.0162647
													41	3	0.0439013
													41	4	0.0862362
													41	5	0.13139
													41	6	0.161605
													41	7	0.164896
													41	8	0.142355
													41	9	0.105522
													41	10	0.0679284
													41	11	0.0383152
													41	12	0.0190713
													41	13	0.00842445
													41	14	0.00331766
													41	15	0.00116903
													41	16	0.000369628
													41	17	0.000105099
													41	18	2.69166e-05
													41	19	6.21572e-06
													41	20	1.29496e-06
													41	21	2.43415e-07
													41	22	4.12665e-08
													41	23	6.30413e-09
													41	24	8.66625e-10
													41	25	1.07e-10
													41	26	1.18356e-11
													41	27	1.16915e-12
													41	28	1.02729e-13
													41	29	7.98971e-15
													41	30	5.46716e-16
													41	31	3.26694e-17
													41	32	1.68897e-18
													41	33	7.46598e-20
													41	34	2.77932e-21
													41	35	8.53933e-23
													41	36	2.10606e-24
													41	37	4.00384e-26
													41	38	5.50184e-28
													41	39	4.8587e-30
													41	40	2.07019e-32
													42	0	0.000380732
													42	42	6.21039e-38
													42	1	0.00334091
													42	2	0.0142554
													42	3	0.03941
													42	4	0.0793563
													42	5	0.124052
													42	6	0.156694
													42	7	0.164361
													42	8	0.146018
													42	9	0.111507
													42	10	0.0740377
													42	11	0.0431277
													42	12	0.0221986
													42	13	0.0101547
													42	14	0.00414757
													42	15	0.00151821
													42	16	0.00049954
													42	17	0.000148088
													42	18	3.96221e-05
													42	19	9.57984e-06
													42	20	2.09463e-06
													42	21	4.14302e-07
													42	22	7.41178e-08
													42	23	1.19859e-08
													42	24	1.75028e-09
													42	25	2.30447e-10
													42	26	2.73009e-11
													42	27	2.90257e-12
													42	28	2.76033e-13
													42	29	2.33858e-14
													42	30	1.75628e-15
													42	31	1.16208e-16
													42	32	6.72362e-18
													42	33	3.37002e-19
													42	34	1.44607e-20
													42	35	5.23186e-22
													42	36	1.56411e-23
													42	37	3.75789e-25
													42	38	6.96744e-27
													42	39	9.34799e-29
													42	40	8.06929e-31
													42	41	3.3646e-33
													43	0	0.000311094
													43	43	1.13591e-38
													43	1	0.00279948
													43	2	0.0122591
													43	3	0.0348091
													43	4	0.07205
													43	5	0.115877
													43	6	0.150724
													43	7	0.162959
													43	8	0.149373
													43	9	0.11782
													43	10	0.0808911
													43	11	0.0487813
													43	12	0.0260267
													43	13	0.0123576
													43	14	0.0052463
													43	15	0.00199913
													43	16	0.000685859
													43	17	0.00021237
													43	18	5.9461e-05
													43	19	1.50747e-05
													43	20	3.46372e-06
													43	21	7.21643e-07
													43	22	1.36339e-07
													43	23	2.33501e-08
													43	24	3.62242e-09
													43	25	5.08432e-10
													43	26	6.44574e-11
													43	27	7.36514e-12
													43	28	7.56439e-13
													43	29	6.95963e-14
													43	30	5.71243e-15
													43	31	4.16185e-16
													43	32	2.67488e-17
													43	33	1.50515e-18
													43	34	7.34551e-20
													43	35	3.07242e-21
													43	36	1.08474e-22
													43	37	3.1679e-24
													43	38	7.44268e-26
													43	39	1.35076e-27
													43	40	1.77573e-29
													43	41	1.50341e-31
													43	42	6.15452e-34
													44	0	0.000246071
													44	44	2.37423e-39
													44	1	0.00227937
													44	2	0.0102819
													44	3	0.0300958
													44	4	0.0642661
													44	5	0.106716
													44	6	0.14344
													44	7	0.160401
													44	8	0.152212
													44	9	0.124415
													44	10	0.0886097
													44	11	0.0554927
													44	12	0.0307827
													44	13	0.0152146
													44	14	0.00673266
													44	15	0.00267784
													44	16	0.000960353
													44	17	0.000311337
													44	18	9.14214e-05
													44	19	2.43521e-05
													44	20	5.89059e-06
													44	21	1.29478e-06
													44	22	2.58677e-07
													44	23	4.69666e-08
													44	24	7.74581e-09
													44	25	1.1593e-09
													44	26	1.57255e-10
													44	27	1.92983e-11
													44	28	2.13776e-12
													44	29	2.13157e-13
													44	30	1.90651e-14
													44	31	1.52318e-15
													44	32	1.08147e-16
													44	33	6.78145e-18
													44	34	3.727e-19
													44	35	1.77835e-20
													44	36	7.27984e-22
													44	37	2.51784e-23
													44	38	7.21009e-25
													44	39	1.66248e-26
													44	40	2.96375e-28
													44	41	3.83046e-30
													44	42	3.19103e-32
													44	43	1.28648e-34
													45	0	0.000187289
													45	45	5.67158e-40
													45	1	0.00179365
													45	2	0.00837025
													45	3	0.0253627
													45	4	0.0561034
													45	5	0.0965758
													45	6	0.134668
													45	7	0.15635
													45	8	0.154169
													45	9	0.131055
													45	10	0.0971628
													45	11	0.0634038
													45	12	0.0366855
													45	13	0.0189336
													45	14	0.00875884
													45	15	0.00364646
													45	16	0.00137063
													45	17	0.000466374
													45	18	0.000143955
													45	19	4.03737e-05
													45	20	1.03007e-05
													45	21	2.39263e-06
													45	22	5.06182e-07
													45	23	9.75402e-08
													45	24	1.71149e-08
													45	25	2.7327e-09
													45	26	3.96625e-10
													45	27	5.22535e-11
													45	28	6.23709e-12
													45	29	6.72908e-13
													45	30	6.543e-14
													45	31	5.71362e-15
													45	32	4.46172e-16
													45	33	3.09958e-17
													45	34	1.90363e-18
													45	35	1.02566e-19
													45	36	4.80222e-21
													45	37	1.93065e-22
													45	38	6.56342e-24
													45	39	1.84889e-25
													45	40	4.19692e-27
													45	41	7.37139e-29
													45	42	9.39312e-31
													45	43	7.72068e-33
													45	44	3.07334e-35
													46	0	0.000147758
													46	46	1.19711e-40
													46	1	0.0014546
													46	2	0.00698212
													46	3	0.0217761
													46	4	0.0496149
													46	5	0.0880333
													46	6	0.126628
													46	7	0.151773
													46	8	0.154629
													46	9	0.135934
													46	10	0.104316
													46	11	0.0705293
													46	12	0.0423249
													46	13	0.0226805
													46	14	0.0109064
													46	15	0.00472554
													46	16	0.00185099
													46	17	0.000657236
													46	18	0.000212008
													46	19	6.22367e-05
													46	20	1.66482e-05
													46	21	4.0618e-06
													46	22	9.04357e-07
													46	23	1.83793e-07
													46	24	3.40904e-08
													46	25	5.76837e-09
													46	26	8.89702e-10
													46	27	1.2494e-10
													46	28	1.59498e-11
													46	29	1.84734e-12
													46	30	1.93651e-13
													46	31	1.8318e-14
													46	32	1.55798e-15
													46	33	1.18627e-16
													46	34	8.04413e-18
													46	35	4.82719e-19
													46	36	2.54374e-20
													46	37	1.16592e-21
													46	38	4.59286e-23
													46	39	1.53121e-24
													46	40	4.23358e-26
													46	41	9.44003e-28
													46	42	1.62999e-29
													46	43	2.04353e-31
													46	44	1.65386e-33
													46	45	6.48737e-36
													47	0	0.000130919
													47	47	1.36426e-41
													47	1	0.00130566
													47	2	0.00635219
													47	3	0.0200901
													47	4	0.0464423
													47	5	0.083655
													47	6	0.122229
													47	7	0.148908
													47	8	0.154304
													47	9	0.138064
													47	10	0.10792
													47	11	0.0743798
													47	12	0.0455392
													47	13	0.0249192
													47	14	0.0122482
													47	15	0.00542993
													47	16	0.00217858
													47	17	0.00079328
													47	18	0.000262748
													47	19	7.93052e-05
													47	20	2.18437e-05
													47	21	5.49619e-06
													47	22	1.26419e-06
													47	23	2.6591e-07
													47	24	5.11509e-08
													47	25	8.99602e-09
													47	26	1.44569e-09
													47	27	2.12095e-10
													47	28	2.83707e-11
													47	29	3.45451e-12
													47	30	3.82111e-13
													47	31	3.82995e-14
													47	32	3.468e-15
													47	33	2.8266e-16
													47	34	2.06465e-17
													47	35	1.34444e-18
													47	36	7.75505e-20
													47	37	3.93197e-21
													47	38	1.73567e-22
													47	39	6.59087e-24
													47	40	2.12013e-25
													47	41	5.66113e-27
													47	42	1.22024e-28
													47	43	2.03865e-30
													47	44	2.4754e-32
													47	45	1.94227e-34
													47	46	7.39427e-37
													48	0	0.000103443
													48	48	2.86313e-42
													48	1	0.00105912
													48	2	0.00529309
													48	3	0.017207
													48	4	0.0409119
													48	5	0.0758453
													48	6	0.114134
													48	7	0.143309
													48	8	0.153171
													48	9	0.141472
													48	10	0.114246
													48	11	0.0814187
													48	12	0.0515919
													48	13	0.0292467
													48	14	0.0149075
													48	15	0.00686087
													48	16	0.00286093
													48	17	0.00108401
													48	18	0.000374089
													48	19	0.000117804
													48	20	3.39029e-05
													48	21	8.92699e-06
													48	22	2.15235e-06
													48	23	4.75416e-07
													48	24	9.62218e-08
													48	25	1.7843e-08
													48	26	3.03026e-09
													48	27	4.70986e-10
													48	28	6.69284e-11
													48	29	8.6836e-12
													48	30	1.02691e-12
													48	31	1.10454e-13
													48	32	1.0778e-14
													48	33	9.5116e-16
													48	34	7.56346e-17
													48	35	5.39532e-18
													48	36	3.43429e-19
													48	37	1.93821e-20
													48	38	9.62334e-22
													48	39	4.16336e-23
													48	40	1.55073e-24
													48	41	4.89676e-26
													48	42	1.2845e-27
													48	43	2.72196e-29
													48	44	4.47406e-31
													48	45	5.34853e-33
													48	46	4.13461e-35
													48	47	1.55192e-37
													49	0	8.59555e-05
													49	49	4.84034e-43
													49	1	0.000897559
													49	2	0.00457731
													49	3	0.0151928
													49	4	0.0369044
													49	5	0.0699395
													49	6	0.107661
													49	7	0.138376
													49	8	0.151504
													49	9	0.14345
													49	10	0.118849
													49	11	0.0869684
													49	12	0.0566343
													49	13	0.0330243
													49	14	0.0173316
													49	15	0.00822121
													49	16	0.00353715
													49	17	0.00138441
													49	18	0.000494107
													49	19	0.000161131
													49	20	4.8087e-05
													49	21	1.31494e-05
													49	22	3.29765e-06
													49	23	7.58914e-07
													49	24	1.60327e-07
													49	25	3.10935e-08
													49	26	5.53445e-09
													49	27	9.0365e-10
													49	28	1.35237e-10
													49	29	1.85303e-11
													49	30	2.32133e-12
													49	31	2.65387e-13
													49	32	2.7629e-14
													49	33	2.61246e-15
													49	34	2.23649e-16
													49	35	1.72698e-17
													49	36	1.19749e-18
													49	37	7.41647e-20
													49	38	4.07633e-21
													49	39	1.97285e-22
													49	40	8.32704e-24
													49	41	3.02851e-25
													49	42	9.34568e-27
													49	43	2.39773e-28
													49	44	4.97345e-30
													49	45	8.00816e-32
													49	46	9.38564e-34
													49	47	7.11882e-36
													49	48	2.62388e-38
													50	0	7.40593e-05
													50	50	6.69898e-44
													50	1	0.000785234
													50	2	0.00406803
													50	3	0.0137237
													50	4	0.0338995
													50	5	0.0653675
													50	6	0.10244
													50	7	0.134125
													50	8	0.149687
													50	9	0.144565
													50	10	0.122254
													50	11	0.0913806
													50	12	0.0608325
													50	13	0.0362919
													50	14	0.0195035
													50	15	0.00948208
													50	16	0.00418542
													50	17	0.00168235
													50	18	0.000617324
													50	19	0.000207214
													50	20	6.37322e-05
													50	21	1.79847e-05
													50	22	4.66112e-06
													50	23	1.11027e-06
													50	24	2.43171e-07
													50	25	4.89793e-08
													50	26	9.0718e-09
													50	27	1.54455e-09
													50	28	2.41585e-10
													50	29	3.46825e-11
													50	30	4.56464e-12
													50	31	5.49927e-13
													50	32	6.05345e-14
													50	33	6.07472e-15
													50	34	5.54258e-16
													50	35	4.58324e-17
													50	36	3.42188e-18
													50	37	2.29632e-19
													50	38	1.37765e-20
													50	39	7.34141e-22
													50	40	3.44786e-23
													50	41	1.41339e-24
													50	42	4.99665e-26
													50	43	1.50002e-27
													50	44	3.74694e-29
													50	45	7.57318e-31
													50	46	1.18919e-32
													50	47	1.3603e-34
													50	48	1.00784e-36
													50	49	3.63184e-39
													51	0	6.02987e-05
													51	51	1.2447e-44
													51	1	0.000653094
													51	2	0.00345807
													51	3	0.0119296
													51	4	0.0301508
													51	5	0.0595206
													51	6	0.095552
													51	7	0.128238
													51	8	0.146796
													51	9	0.145516
													51	10	0.126399
													51	11	0.097117
													51	12	0.0665085
													51	13	0.0408517
													51	14	0.0226228
													51	15	0.0113441
													51	16	0.00516956
													51	17	0.00214743
													51	18	0.00081521
													51	19	0.000283415
													51	20	9.03918e-05
													51	21	2.64848e-05
													51	22	7.1367e-06
													51	23	1.77004e-06
													51	24	4.04283e-07
													51	25	8.50611e-08
													51	26	1.64868e-08
													51	27	2.94315e-09
													51	28	4.83682e-10
													51	29	7.31259e-11
													51	30	1.01607e-11
													51	31	1.29588e-12
													51	32	1.51466e-13
													51	33	1.61936e-14
													51	34	1.57999e-15
													51	35	1.403e-16
													51	36	1.1302e-17
													51	37	8.22766e-19
													51	38	5.38834e-20
													51	39	3.15747e-21
													51	40	1.64479e-22
													51	41	7.55706e-24
													51	42	3.03297e-25
													51	43	1.05053e-26
													51	44	3.09218e-28
													51	45	7.57859e-30
													51	46	1.50395e-31
													51	47	2.32032e-33
													51	48	2.60956e-35
													51	49	1.90219e-37
													51	50	6.74867e-40
													52	0	5.73198e-05
													52	52	6.14915e-46
													52	1	0.000623809
													52	2	0.0033195
													52	3	0.0115111
													52	4	0.0292506
													52	5	0.0580697
													52	6	0.0937719
													52	7	0.126623
													52	8	0.145879
													52	9	0.14558
													52	10	0.127344
													52	11	0.0985636
													52	12	0.0680207
													52	13	0.0421192
													52	14	0.0235234
													52	15	0.0119013
													52	16	0.0054746
													52	17	0.00229673
													52	18	0.000881026
													52	19	0.000309687
													52	20	9.99276e-05
													52	21	2.9642e-05
													52	22	8.09254e-06
													52	23	2.03516e-06
													52	24	4.71754e-07
													52	25	1.00831e-07
													52	26	1.98745e-08
													52	27	3.61224e-09
													52	28	6.05186e-10
													52	29	9.34084e-11
													52	30	1.32713e-11
													52	31	1.73382e-12
													52	32	2.08003e-13
													52	33	2.28764e-14
													52	34	2.30194e-15
													52	35	2.11424e-16
													52	36	1.76748e-17
													52	37	1.34047e-18
													52	38	9.18682e-20
													52	39	5.66346e-21
													52	40	3.12341e-22
													52	41	1.53094e-23
													52	42	6.61652e-25
													52	43	2.497e-26
													52	44	8.12932e-28
													52	45	2.24804e-29
													52	46	5.17368e-31
													52	47	9.63562e-33
													52	48	1.39436e-34
													52	49	1.47001e-36
													52	50	1.00388e-38
													52	51	3.3352e-41
													53	0	4.24355e-05
													53	53	1.59676e-46
													53	1	0.000476707
													53	2	0.00261951
													53	3	0.00938396
													53	4	0.0246441
													53	5	0.0505862
													53	6	0.084501
													53	7	0.118093
													53	8	0.140879
													53	9	0.145657
													53	10	0.132079
													53	11	0.106037
													53	12	0.0759518
													53	13	0.0488451
													53	14	0.0283522
													53	15	0.0149192
													53	16	0.00714343
													53	17	0.00312194
													53	18	0.00124864
													53	19	0.000458047
													53	20	0.000154396
													53	21	4.78932e-05
													53	22	1.36883e-05
													53	23	3.60809e-06
													53	24	8.77727e-07
													53	25	1.9715e-07
													53	26	4.08968e-08
													53	27	7.8351e-09
													53	28	1.38603e-09
													53	29	2.26303e-10
													53	30	3.40807e-11
													53	31	4.72978e-12
													53	32	6.04215e-13
													53	33	7.09486e-14
													53	34	7.64455e-15
													53	35	7.54271e-16
													53	36	6.79861e-17
													53	37	5.58203e-18
													53	38	4.16094e-19
													53	39	2.80484e-20
													53	40	1.70188e-21
													53	41	9.24401e-23
													53	42	4.46526e-24
													53	43	1.90298e-25
													53	44	7.08584e-27
													53	45	2.27738e-28
													53	46	6.22054e-30
													53	47	1.41479e-31
													53	48	2.60533e-33
													53	49	3.72959e-35
													53	50	3.89152e-37
													53	51	2.6315e-39
													53	52	8.66103e-42
													54	0	3.37705e-05
													54	54	3.26047e-47
													54	1	0.000388032
													54	2	0.00218196
													54	3	0.0080027
													54	4	0.0215281
													54	5	0.045289
													54	6	0.0775759
													54	7	0.111234
													54	8	0.136226
													54	9	0.144682
													54	10	0.134852
													54	11	0.111355
													54	12	0.082095
													54	13	0.0543801
													54	14	0.0325367
													54	15	0.0176621
													54	16	0.00873119
													54	17	0.0039431
													54	18	0.00163116
													54	19	0.000619482
													54	20	0.000216399
													54	21	6.96403e-05
													54	22	2.06727e-05
													54	23	5.6664e-06
													54	24	1.43525e-06
													54	25	3.36119e-07
													54	26	7.28025e-08
													54	27	1.45861e-08
													54	28	2.70289e-09
													54	29	4.63111e-10
													54	30	7.3331e-11
													54	31	1.0723e-11
													54	32	1.44663e-12
													54	33	1.79838e-13
													54	34	2.05708e-14
													54	35	2.16122e-15
													54	36	2.08121e-16
													54	37	1.83245e-17
													54	38	1.47094e-18
													54	39	1.07284e-19
													54	40	7.08164e-21
													54	41	4.21075e-22
													54	42	2.24291e-23
													54	43	1.06322e-24
													54	44	4.44965e-26
													54	45	1.62811e-27
													54	46	5.14529e-29
													54	47	1.38278e-30
													54	48	3.09624e-32
													54	49	5.61669e-34
													54	50	7.92525e-36
													54	51	8.15563e-38
													54	52	5.44225e-40
													54	53	1.76865e-42
													55	0	2.78192e-05
													55	55	5.74587e-48
													55	1	0.000325601
													55	2	0.00186582
													55	3	0.00697692
													55	4	0.0191446
													55	5	0.0411016
													55	6	0.071886
													55	7	0.105302
													55	8	0.131822
													55	9	0.143191
													55	10	0.136584
													55	11	0.115495
													55	12	0.0872513
													55	13	0.0592642
													55	14	0.0363861
													55	15	0.0202835
													55	16	0.0103051
													55	17	0.00478689
													55	18	0.00203859
													55	19	0.000797767
													55	20	0.000287434
													55	21	9.55034e-05
													55	22	2.93022e-05
													55	23	8.31094e-06
													55	24	2.1809e-06
													55	25	5.29816e-07
													55	26	1.19206e-07
													55	27	2.48454e-08
													55	28	4.79704e-09
													55	29	8.57823e-10
													55	30	1.42021e-10
													55	31	2.17563e-11
													55	32	3.08139e-12
													55	33	4.03082e-13
													55	34	4.86381e-14
													55	35	5.4055e-15
													55	36	5.52311e-16
													55	37	5.17719e-17
													55	38	4.44101e-18
													55	39	3.47599e-19
													55	40	2.47402e-20
													55	41	1.59486e-21
													55	42	9.26818e-23
													55	43	4.82848e-24
													55	44	2.24024e-25
													55	45	9.18273e-27
													55	46	3.29305e-28
													55	47	1.02065e-29
													55	48	2.69191e-31
													55	49	5.91914e-33
													55	50	1.05511e-34
													55	51	1.46384e-36
													55	52	1.48208e-38
													55	53	9.73649e-41
													55	54	3.11712e-43
													56	0	2.67421e-05
													56	56	2.22453e-49
													56	1	0.000314073
													56	2	0.00180619
													56	3	0.00677905
													56	4	0.0186735
													56	5	0.0402516
													56	6	0.0706942
													56	7	0.104008
													56	8	0.130795
													56	9	0.142751
													56	10	0.13684
													56	11	0.116312
													56	12	0.0883448
													56	13	0.0603477
													56	14	0.0372718
													56	15	0.0209069
													56	16	0.0106914
													56	17	0.00500053
													56	18	0.00214499
													56	19	0.000845806
													56	20	0.000307192
													56	21	0.000102934
													56	22	3.18652e-05
													56	23	9.12362e-06
													56	24	2.41822e-06
													56	25	5.93739e-07
													56	26	1.35103e-07
													56	27	2.84986e-08
													56	28	5.57322e-09
													56	29	1.01033e-09
													56	30	1.69734e-10
													56	31	2.64124e-11
													56	32	3.8044e-12
													56	33	5.06773e-13
													56	34	6.23605e-14
													56	35	7.07926e-15
													56	36	7.40204e-16
													56	37	7.11505e-17
													56	38	6.27345e-18
													56	39	5.06077e-19
													56	40	3.72398e-20
													56	41	2.49094e-21
													56	42	1.50839e-22
													56	43	8.22976e-24
													56	44	4.02287e-25
													56	45	1.75004e-26
													56	46	6.72068e-28
													56	47	2.25606e-29
													56	48	6.53919e-31
													56	49	1.61118e-32
													56	50	3.30587e-34
													56	51	5.49204e-36
													56	52	7.092e-38
													56	53	6.67389e-40
													56	54	4.06916e-42
													56	55	1.20736e-44
													57	0	2.31348e-05
													57	57	3.00076e-50
													57	1	0.000275313
													57	2	0.00160491
													57	3	0.00610824
													57	4	0.017069
													57	5	0.0373408
													57	6	0.0665877
													57	7	0.0995146
													57	8	0.127182
													57	9	0.141138
													57	10	0.137637
													57	11	0.119081
													57	12	0.0921174
													57	13	0.0641244
													57	14	0.0403846
													57	15	0.0231144
													57	16	0.0120694
													57	17	0.0057682
													57	18	0.00253018
													57	19	0.00102106
													57	20	0.000379847
													57	21	0.000130487
													57	22	4.14519e-05
													57	23	1.21913e-05
													57	24	3.32274e-06
													57	25	8.39851e-07
													57	26	1.9697e-07
													57	27	4.2879e-08
													57	28	8.66572e-09
													57	29	1.62584e-09
													57	30	2.83125e-10
													57	31	4.57456e-11
													57	32	6.85408e-12
													57	33	9.51603e-13
													57	34	1.22309e-13
													57	35	1.45364e-14
													57	36	1.5953e-15
													57	37	1.61402e-16
													57	38	1.5025e-17
													57	39	1.28406e-18
													57	40	1.00483e-19
													57	41	7.17835e-21
													57	42	4.66504e-22
													57	43	2.74669e-23
													57	44	1.45817e-24
													57	45	6.94057e-26
													57	46	2.9421e-27
													57	47	1.10175e-28
													57	48	3.60899e-30
													57	49	1.02148e-31
													57	50	2.45938e-33
													57	51	4.93454e-35
													57	52	8.02197e-37
													57	53	1.0144e-38
													57	54	9.3547e-41
													57	55	5.5935e-43
													57	56	1.62885e-45
													58	0	1.82385e-05
													58	58	6.35088e-51
													58	1	0.000221942
													58	2	0.00132351
													58	3	0.00515514
													58	4	0.0147492
													58	5	0.0330504
													58	6	0.0603978
													58	7	0.0925458
													58	8	0.121326
													58	9	0.138185
													58	10	0.138378
													58	11	0.123008
													58	12	0.097824
													58	13	0.0700489
													58	14	0.045409
													58	15	0.0267695
													58	16	0.014407
													58	17	0.0071018
													58	18	0.00321548
													58	19	0.00134045
													58	20	0.000515555
													58	21	0.000183262
													58	22	6.02956e-05
													58	23	1.83841e-05
													58	24	5.19971e-06
													58	25	1.36534e-06
													58	26	3.33031e-07
													58	27	7.54912e-08
													58	28	1.59067e-08
													58	29	3.11577e-09
													58	30	5.673e-10
													58	31	9.59851e-11
													58	32	1.50852e-11
													58	33	2.20082e-12
													58	34	2.97823e-13
													58	35	3.73456e-14
													58	36	4.33418e-15
													58	37	4.64876e-16
													58	38	4.60045e-17
													58	39	4.19222e-18
													58	40	3.50978e-19
													58	41	2.69256e-20
													58	42	1.88701e-21
													58	43	1.20386e-22
													58	44	6.96271e-24
													58	45	3.63326e-25
													58	46	1.70086e-26
													58	47	7.09531e-28
													58	48	2.61629e-29
													58	49	8.44344e-31
													58	50	2.35577e-32
													58	51	5.5941e-34
													58	52	1.1076e-35
													58	53	1.77776e-37
													58	54	2.22066e-39
													58	55	2.02395e-41
													58	56	1.19666e-43
													58	57	3.44756e-46
													59	0	1.48497e-05
													59	59	1.18002e-51
													59	1	0.000184093
													59	2	0.00111884
													59	3	0.00444321
													59	4	0.0129666
													59	5	0.02965
													59	6	0.0553165
													59	7	0.0865726
													59	8	0.115979
													59	9	0.135052
													59	10	0.138342
													59	11	0.125864
													59	12	0.102503
													59	13	0.0752096
													59	14	0.0499872
													59	15	0.0302328
													59	16	0.016704
													59	17	0.00845914
													59	18	0.00393758
													59	19	0.00168884
													59	20	0.000668825
													59	21	0.000245004
													59	22	8.31434e-05
													59	23	2.61714e-05
													59	24	7.64943e-06
													59	25	2.07778e-06
													59	26	5.24838e-07
													59	27	1.23343e-07
													59	28	2.69778e-08
													59	29	5.49238e-09
													59	30	1.04082e-09
													59	31	1.83558e-10
													59	32	3.01168e-11
													59	33	4.59479e-12
													59	34	6.51408e-13
													59	35	8.57435e-14
													59	36	1.04679e-14
													59	37	1.18381e-15
													59	38	1.23833e-16
													59	39	1.19611e-17
													59	40	1.0647e-18
													59	41	8.7136e-20
													59	42	6.5393e-21
													59	43	4.48633e-22
													59	44	2.80372e-23
													59	45	1.58952e-24
													59	46	8.1356e-26
													59	47	3.73798e-27
													59	48	1.53136e-28
													59	49	5.54865e-30
													59	50	1.76064e-31
													59	51	4.8326e-33
													59	52	1.12959e-34
													59	53	2.20271e-36
													59	54	3.48396e-38
													59	55	4.29087e-40
													59	56	3.85802e-42
													59	57	2.25152e-44
													59	58	6.40625e-47
													60	0	1.22865e-05
													60	60	2.03685e-52
													60	1	0.000154879
													60	2	0.000957489
													60	3	0.00386938
													60	4	0.0114954
													60	5	0.0267702
													60	6	0.0508862
													60	7	0.0811774
													60	8	0.110903
													60	9	0.13176
													60	10	0.137774
													60	11	0.128018
													60	12	0.106536
													60	13	0.0799208
													60	14	0.0543409
													60	15	0.0336426
													60	16	0.0190392
													60	17	0.00988229
													60	18	0.00471805
													60	19	0.002077
													60	20	0.000844891
													60	21	0.00031816
													60	22	0.000111082
													60	23	3.60054e-05
													60	24	1.08465e-05
													60	25	3.03951e-06
													60	26	7.92893e-07
													60	27	1.92646e-07
													60	28	4.36115e-08
													60	29	9.201e-09
													60	30	1.80921e-09
													60	31	3.3153e-10
													60	32	5.66024e-11
													60	33	9.00017e-12
													60	34	1.33208e-12
													60	35	1.83384e-13
													60	36	2.34613e-14
													60	37	2.78634e-15
													60	38	3.06797e-16
													60	39	3.12715e-17
													60	40	2.94555e-18
													60	41	2.55874e-19
													60	42	2.04512e-20
													60	43	1.49995e-21
													60	44	1.00637e-22
													60	45	6.1547e-24
													60	46	3.41683e-25
													60	47	1.71357e-26
													60	48	7.7192e-28
													60	49	3.10239e-29
													60	50	1.10343e-30
													60	51	3.4389e-32
													60	52	9.27623e-34
													60	53	2.13205e-35
													60	54	4.0904e-37
													60	55	6.36874e-39
													60	56	7.72574e-41
													60	57	6.84567e-43
													60	58	3.93939e-45
													60	59	1.10589e-47
													61	0	1.02824e-05
													61	61	3.32233e-53
													61	1	0.000131621
													61	2	0.000826574
													61	3	0.00339442
													61	4	0.0102515
													61	5	0.0242787
													61	6	0.0469526
													61	7	0.0762366
													61	8	0.106054
													61	9	0.128358
													61	10	0.136793
													61	11	0.129609
													61	12	0.11004
													61	13	0.084262
													61	14	0.0585132
													61	15	0.0370188
													61	16	0.0214212
													61	17	0.0113759
													61	18	0.0055604
													61	19	0.00250778
													61	20	0.00104586
													61	21	0.000404076
													61	22	0.000144859
													61	23	4.82513e-05
													61	24	1.49502e-05
													61	25	4.31292e-06
													61	26	1.15934e-06
													61	27	2.90553e-07
													61	28	6.79207e-08
													61	29	1.48137e-08
													61	30	3.01489e-09
													61	31	5.72556e-10
													61	32	1.01446e-10
													61	33	1.67646e-11
													61	34	2.58283e-12
													61	35	3.70749e-13
													61	36	4.95464e-14
													61	37	6.15866e-15
													61	38	7.11239e-16
													61	39	7.62127e-17
													61	40	7.56581e-18
													61	41	6.94589e-19
													61	42	5.88513e-20
													61	43	4.59111e-21
													61	44	3.2888e-22
													61	45	2.15658e-23
													61	46	1.28985e-24
													61	47	7.00729e-26
													61	48	3.44104e-27
													61	49	1.51872e-28
													61	50	5.98379e-30
													61	51	2.08762e-31
													61	52	6.38555e-33
													61	53	1.69148e-34
													61	54	3.81993e-36
													61	55	7.20488e-38
													61	56	1.10347e-39
													61	57	1.31744e-41
													61	58	1.14957e-43
													61	59	6.51813e-46
													61	60	1.804e-48
													62	0	8.28512e-06
													62	62	6.45341e-54
													62	1	0.000108052
													62	2	0.000691584
													62	3	0.00289564
													62	4	0.00891955
													62	5	0.021554
													62	6	0.0425484
													62	7	0.0705484
													62	8	0.100262
													62	9	0.124026
													62	10	0.135155
													62	11	0.131005
													62	12	0.113841
													62	13	0.0892691
													62	14	0.0635148
													62	15	0.0411939
													62	16	0.0244509
													62	17	0.0133271
													62	18	0.00669002
													62	19	0.00310073
													62	20	0.00132983
													62	21	0.000528738
													62	22	0.00019521
													62	23	6.70167e-05
													62	24	2.14187e-05
													62	25	6.37915e-06
													62	26	1.7719e-06
													62	27	4.59309e-07
													62	28	1.11165e-07
													62	29	2.51294e-08
													62	30	5.30674e-09
													62	31	1.04696e-09
													62	32	1.92956e-10
													62	33	3.32134e-11
													62	34	5.33755e-12
													62	35	8.00431e-13
													62	36	1.11938e-13
													62	37	1.45864e-14
													62	38	1.76936e-15
													62	39	1.99562e-16
													62	40	2.09e-17
													62	41	2.02928e-18
													62	42	1.82339e-19
													62	43	1.51308e-20
													62	44	1.15679e-21
													62	45	8.12596e-23
[truncated: 1,046,576+ more rows]

## Sheet: sheet1
	0	1	2	3	4	5	6	7	8	9	10	11	12	13	14	15	16	17	18	19	20	21	22	23	24	25	26	27
0	1	0.93115	0.770423	0.609827	0.504563	0.40074	0.356592	0.281067	0.221765	0.199094	0.154128	0.154125	0.118141	0.0936101	0.0853054	0.067301	0.0609011	0.0503889	0.0413189	0.0326106	0.0302217	0.0228327	0.0190742	0.0155245	0.0122613	0.0105966	0.0105966	0.00720334
1		0.0641096	0.213771	0.329806	0.378141	0.404155	0.403779	0.393785	0.370002	0.354848	0.31967	0.319667	0.281018	0.247198	0.233572	0.202279	0.189444	0.167256	0.14622	0.124111	0.117408	0.0960916	0.0840323	0.0719436	0.0600847	0.0535919	0.0432182	0.0395577
2			0.011066	0.0533203	0.101045	0.158063	0.185173	0.231473	0.265719	0.27638	0.294103	0.294103	0.300072	0.296115	0.291775	0.279491	0.272149	0.257873	0.241562	0.221468	0.214336	0.190638	0.175074	0.158131	0.140015	0.129163	0.11093	0.103884
3				5.54257e-07	0.0111123	0.0296176	0.0437677	0.073717	0.107002	0.123227	0.157818	0.15782	0.189638	0.212569	0.219981	0.235134	0.239352	0.245013	0.247328	0.246113	0.244307	0.236979	0.229351	0.21925	0.206403	0.19739	0.180929	0.173645
4					5.54257e-07	0.0026028	0.00557888	0.0136672	0.0263371	0.0345834	0.0546041	0.054606	0.0787034	0.101738	0.111571	0.134452	0.144026	0.16048	0.175696	0.190793	0.194845	0.206939	0.211884	0.215134	0.215999	0.214697	0.210521	0.207442
5						5.54257e-07	0.000359642	0.00146506	0.00403958	0.00631903	0.0127027	0.0127035	0.0224864	0.0341595	0.0401548	0.0552278	0.0627614	0.0767885	0.0918531	0.109524	0.115477	0.134882	0.146743	0.158866	0.170693	0.176844	0.185977	0.188531
6							5.54257e-07	8.32853e-05	0.000374826	0.00074947	0.00200739	0.00200758	0.00450474	0.00823852	0.0105381	0.016789	0.0204442	0.0277487	0.0365759	0.0482259	0.0527163	0.068061	0.0790605	0.0916563	0.105783	0.114596	0.129615	0.13548
7								5.54257e-07	1.90807e-05	5.54481e-05	0.000212197	0.00021223	0.000631389	0.00143567	0.00203919	0.00383296	0.00506499	0.00771962	0.0113249	0.0166467	0.01896	0.0272133	0.0339373	0.0423347	0.0527017	0.0599085	0.0731032	0.0789835
8									5.54257e-07	2.3127e-06	1.43136e-05	1.43173e-05	6.05238e-05	0.00017906	0.000290542	0.000659608	0.000961372	0.0016697	0.00275869	0.00456407	0.00544918	0.00875252	0.0117914	0.0159127	0.0214664	0.0257072	0.0339591	0.0380322
9										5.54257e-07	5.54257e-07	5.54513e-07	3.7677e-06	1.55527e-05	3.00585e-05	8.50356e-05	0.000139673	0.000281508	0.000531383	0.0010008	0.00126183	0.00228562	0.00335014	0.00492105	0.00723142	0.00916408	0.0131555	0.0153202
10											5.54257e-07	9.32283e-09	1.36608e-07	8.90579e-07	2.19135e-06	8.07295e-06	1.53916e-05	3.6844e-05	8.08836e-05	0.00017583	0.000236263	0.00048701	0.000783081	0.00126081	0.00203017	0.00273633	0.00428719	0.00520998
11												9.32283e-09	2.17672e-09	3.00904e-08	1.0643e-07	5.4647e-07	1.26218e-06	3.70107e-06	9.66682e-06	2.46763e-05	3.5749e-05	8.47737e-05	0.000150986	0.000268619	0.000477171	0.000688018	0.00118222	0.00150531
12													9.32283e-09	4.52014e-10	3.08143e-09	2.4894e-08	7.44921e-08	2.79501e-07	8.95386e-07	2.74403e-06	4.35068e-06	1.20274e-05	2.40023e-05	4.7634e-05	9.40835e-05	0.000146094	0.000276847	0.000371056
13														9.32283e-09	4.01087e-11	6.82004e-10	2.98439e-09	1.53274e-08	6.28788e-08	2.38336e-07	4.2189e-07	1.38246e-06	3.13474e-06	7.01819e-06	1.55553e-05	2.62169e-05	5.51404e-05	7.821e-05
14															9.32283e-09	8.46586e-12	7.25146e-11	5.75138e-10	3.23056e-09	1.58019e-08	3.21036e-08	1.27405e-07	3.34001e-07	8.55218e-07	2.15063e-06	3.97056e-06	9.33806e-06	1.4104e-05
15																9.32283e-09	8.05185e-13	1.3183e-11	1.14335e-10	7.71101e-10	1.87218e-09	9.26361e-09	2.8711e-08	8.55253e-08	2.47309e-07	5.05719e-07	1.3417e-06	2.17376e-06
16																	9.32283e-09	1.38996e-13	2.48693e-12	2.60597e-11	8.06378e-11	5.18661e-10	1.95818e-09	6.93687e-09	2.34556e-08	5.38477e-08	1.62873e-07	2.85535e-07
17																		9.32283e-09	2.50215e-14	5.43886e-13	2.41305e-12	2.15386e-11	1.03371e-10	4.4855e-10	1.81235e-09	4.75081e-09	1.65967e-08	3.18174e-08
18																			9.32283e-09	5.27383e-15	4.47299e-14	6.23773e-13	4.0666e-12	2.25471e-11	1.1209e-10	3.4293e-10	1.40644e-09	2.98706e-09
19																				9.32283e-09	3.86425e-16	1.12282e-14	1.1206e-13	8.47998e-13	5.40899e-12	1.98928e-11	9.78337e-11	2.34e-10
20																					9.32283e-09	9.44845e-17	1.92722e-15	2.24229e-14	1.95953e-13	9.03715e-13	5.48532e-12	1.50946e-11
21																						9.32283e-09	1.55547e-17	3.71315e-16	5.0064e-15	3.09308e-14	2.41512e-13	7.87154e-13
22																							1.55547e-17	2.24229e-14	2.24229e-14	2.24229e-14	2.24229e-14	2.24229e-14
23																								3.71315e-16	3.71315e-16	3.71315e-16	3.71315e-16	3.71315e-16
24																									3.71315e-16	2.24229e-14	2.24229e-14	2.24229e-14
25																										3.71315e-16	3.71315e-16	3.71315e-16
26																											3.71315e-16	3.71315e-16
27																												3.71315e-16
