# Supplementary material for: Probabilistic En Route Sector Traffic Demand Prediction Based upon Statistical Analysis of Error Distribution Characteristics
Source: Hindawi journal article supplement (doi:10.1155/2018/8184513), 2018-08-13
Supplement: f1 [file 8184513.f1.rar › Fig.8 AR04-0700-0714.xlsx]

## Sheet: 0700-0714
CALLSIGN	PASSSECTOR	EINSECTORTIME	EOUTSECTORTIME	OPINSECTORTIME	OPOUTSECTORTIME	ATD	FlyTime	Predicted Time Error ∆ti(in)	Predicted Time Error ∆ti(out)	probability distribution(in)	probability distribution(out)	The probability of the aircraft in AR04	0	0	1
AIC314	ZGGGAR04	2014-05-01 07:08:00	2014-05-01 07:18:00	2014-05-01 07:01:29	2014-05-01 07:11:29	2014-05-01 03:24:00	1900-01-01 03:37:29	6.51667	6.51667	0.673519	0.681128	0.214767	1	0	0.785233
PAL655	ZGGGAR04	2014-05-01 07:11:00	2014-05-01 07:21:00	2014-05-01 07:12:37	2014-05-01 07:22:37	2014-04-30 23:45:00	1900-01-01 07:27:37	-1.61667	-1.61667	0.445616	0.45633	0.242268	1	1	0.168642
BOX614	ZGGGAR04	2014-05-05 07:00:00	2014-05-05 07:10:00	2014-05-05 07:05:19	2014-05-05 07:15:19	2014-05-05 02:47:00	1900-01-01 04:18:19	-5.31667	-5.31667	0.343287	0.354284	0.221666	2	0	0.594997
CPA696	ZGGGAR04	2014-05-10 06:20:00	2014-05-10 06:30:00	2014-05-10 07:01:49	2014-05-10 07:11:49	2014-05-10 02:00:00	1900-01-01 05:01:49	-41.8167	-41.8167	0.00120233	0.00144566	0.00120059	2	2	0.0408565
CSN3452	ZGGGAR04	2014-05-12 07:14:47	2014-05-12 07:24:47	2014-05-12 07:07:21	2014-05-12 07:17:21	2014-05-12 06:04:00	1900-01-01 01:03:21	7.43333	7.43333	0.696982	0.704119	0.206224	2	1	0.318022
CSN3452	ZGGGAR04	2014-05-12 07:14:47	2014-05-12 07:24:47	2014-05-12 07:07:21	2014-05-12 07:17:21	2014-05-12 06:04:00	1900-01-01 01:03:21	7.43333	7.43333	0.696982	0.704119	0.206224	3	0	0.463106
CSN3452	ZGGGAR04	2014-05-12 07:20:43	2014-05-12 07:32:43	2014-05-12 07:13:52	2014-05-12 07:24:30	2014-05-12 06:04:00	1900-01-01 01:09:52	6.85	8.21667	0.682137	0.72314	0.188856	3	3	0.0090565
CSN3452	ZGGGAR04	2014-05-12 07:20:43	2014-05-12 07:32:43	2014-05-12 07:13:52	2014-05-12 07:24:30	2014-05-12 06:04:00	1900-01-01 01:09:52	6.85	8.21667	0.682137	0.72314	0.188856	3	1	0.379418
IRM081	ZGGGAR04	2014-05-19 07:13:28	2014-05-19 07:27:28	2014-05-19 07:04:45	2014-05-19 07:18:09	2014-05-19 07:04:45	1900-01-01	8.71667	9.31667	0.728495	0.748798	0.183	3	2	0.102295
BOX614	ZGGGAR04	2014-05-19 07:06:00	2014-05-19 07:16:00	2014-05-19 07:13:40	2014-05-19 07:23:40	2014-05-19 02:53:00	1900-01-01 04:20:40	-7.66667	-7.66667	0.283343	0.294075	0.200019	4	0	0.46255
GAP2659	ZGGGAR04	2014-05-24 07:25:00	2014-05-24 07:35:00	2014-05-24 07:00:35	2014-05-24 07:10:35	2014-05-24 00:25:00	1900-01-01 06:35:35	24.4167	24.4167	0.959089	0.959812	0.0385435	4	4	1.08732e-05
CLX462	ZGGGAR04	2014-05-24 07:03:00	2014-05-24 07:17:00	2014-05-24 07:10:40	2014-05-24 07:24:20	2014-05-24 06:30:00	1900-01-01 00:40:40	-7.66667	-7.33333	0.283343	0.302325	0.197681	4	1	0.379518
IRM081	ZGGGAR04	2014-05-26 07:00:28	2014-05-26 07:14:28	2014-05-26 07:00:24	2014-05-26 07:14:27	2014-05-25 23:51:00	1900-01-01 07:09:24	0.0666667	0.0166667	0.493864	0.502753	0.245573	4	2	0.102627
IRM081	ZGGGAR04	2014-05-26 07:00:28	2014-05-26 07:14:28	2014-05-26 07:00:24	2014-05-26 07:14:27	2014-05-25 23:51:00	1900-01-01 07:09:24	0.0666667	0.0166667	0.493864	0.502753	0.245573	4	3	0.00916844
QAF5	ZGGGAR04	2014-05-26 06:52:00	2014-05-26 07:06:00	2014-05-26 07:00:24	2014-05-26 07:15:02	2014-05-26 05:04:00	1900-01-01 01:56:24	-8.4	-9.03333	0.265719	0.26139	0.196263	5	0	0.367161
								13.8696	14.0108				5	5	2.24231e-06
													5	1	0.396642
													5	2	0.159729
													5	3	0.0284419
													5	4	0.00189938
													6	0	0.291444
													6	6	4.62417e-07
													6	1	0.390562
													6	2	0.208586
													6	3	0.0555165
													6	4	0.0073731
													6	5	0.000393479
													7	0	0.236403
													7	7	8.73304e-08
													7	1	0.371843
													7	2	0.242953
													7	3	0.0844247
													7	4	0.0164653
													7	5	0.00171162
													7	6	7.4686e-05
													8	0	0.191757
													8	8	1.64929e-08
													8	1	0.346264
													8	2	0.267295
													8	3	0.114364
													8	4	0.0292998
													8	5	0.00449795
													8	6	0.000383832
													8	7	1.41758e-05
													9	0	0.156665
													9	9	3.01819e-09
													9	1	0.317989
													9	2	0.281746
													9	3	0.14235
													9	4	0.0448665
													9	5	0.00903668
													9	6	0.00113671
													9	7	8.18227e-05
													9	8	2.60763e-06
													10	0	0.125329
													10	10	6.03696e-10
													10	1	0.285721
													10	2	0.288996
													10	3	0.170232
													10	4	0.0643651
													10	5	0.0162033
													10	6	0.00271686
													10	7	0.000292821
													10	8	1.84521e-05
													10	9	5.2399e-07
													11	0	0.120499
													11	11	2.32685e-11
													11	1	0.279539
													11	2	0.288869
													11	3	0.17481
													11	4	0.0684456
													11	5	0.0180596
													11	6	0.00323667
													11	7	0.000386251
													11	8	2.90273e-05
													11	9	1.215e-06
													11	10	2.07768e-08
													12	0	0.0966783
													12	12	4.59975e-12
													12	1	0.2481
													12	2	0.287025
													12	3	0.197357
													12	4	0.0894717
													12	5	0.02802
													12	6	0.00616689
													12	7	0.000949726
													12	8	9.96438e-05
													12	9	6.71297e-06
													12	10	2.56853e-07
													12	11	4.12586e-09
													13	0	0.0729367
													13	13	1.12957e-12
													13	1	0.210915
													13	2	0.277466
													13	3	0.219377
													13	4	0.115965
													13	5	0.0431109
													13	6	0.0115334
													13	7	0.00223092
													13	8	0.000308401
													13	9	2.95342e-05
													13	10	1.8423e-06
													13	11	6.61888e-08
													13	12	1.01667e-09
													14	0	0.0550255
													14	14	2.77392e-13
													14	1	0.177031
													14	2	0.261123
													14	3	0.233642
													14	4	0.14136
													14	5	0.0610019
													14	6	0.019288
													14	7	0.00451536
													14	8	0.000780519
													14	9	9.80162e-05
													14	10	8.64268e-06
													14	11	5.02353e-07
													14	12	1.70212e-08
													14	13	2.50518e-10
													15	0	0.044226
													15	15	5.44419e-14
													15	1	0.153086
													15	2	0.244619
													15	3	0.239036
													15	4	0.159472
													15	5	0.0767734
													15	6	0.0274749
													15	7	0.00741468
													15	8	0.00151353
													15	9	0.000231966
													15	10	2.61834e-05
													15	11	2.1e-06
													15	12	1.12274e-07
													15	13	3.54198e-09
													15	14	4.93904e-11
													#N/A	#N/A	#N/A
													#N/A	#N/A	#N/A
													#N/A	#N/A	#N/A
													#N/A	#N/A	#N/A
													#N/A	#N/A	#N/A
													#N/A	#N/A	#N/A
													#N/A	#N/A	#N/A
													#N/A	#N/A	#N/A
													#N/A	#N/A	#N/A
													#N/A	#N/A	#N/A
													#N/A	#N/A	#N/A
													#N/A	#N/A	#N/A
													#N/A	#N/A	#N/A
													#N/A	#N/A	#N/A
													#N/A	#N/A	#N/A
													#N/A	#N/A	#N/A
													#N/A	#N/A	#N/A
													#N/A	#N/A	#N/A
													#N/A	#N/A	#N/A
													#N/A	#N/A	#N/A
													#N/A	#N/A	#N/A
													#N/A	#N/A	#N/A
													#N/A	#N/A	#N/A
													#N/A	#N/A	#N/A
													#N/A	#N/A	#N/A
													#N/A	#N/A	#N/A
													#N/A	#N/A	#N/A
													#N/A	#N/A	#N/A
													#N/A	#N/A	#N/A
													#N/A	#N/A	#N/A
													#N/A	#N/A	#N/A
													#N/A	#N/A	#N/A
													#N/A	#N/A	#N/A
													#N/A	#N/A	#N/A
													#N/A	#N/A	#N/A
													#N/A	#N/A	#N/A
													#N/A	#N/A	#N/A
													#N/A	#N/A	#N/A
													#N/A	#N/A	#N/A
													#N/A	#N/A	#N/A
													#N/A	#N/A	#N/A
													#N/A	#N/A	#N/A
													#N/A	#N/A	#N/A
													#N/A	#N/A	#N/A
													#N/A	#N/A	#N/A
													#N/A	#N/A	#N/A
													#N/A	#N/A	#N/A
													#N/A	#N/A	#N/A
													#N/A	#N/A	#N/A
													#N/A	#N/A	#N/A
													#N/A	#N/A	#N/A
													#N/A	#N/A	#N/A
													#N/A	#N/A	#N/A
													#N/A	#N/A	#N/A
													#N/A	#N/A	#N/A
													#N/A	#N/A	#N/A
													#N/A	#N/A	#N/A
													#N/A	#N/A	#N/A
													#N/A	#N/A	#N/A
													#N/A	#N/A	#N/A
													#N/A	#N/A	#N/A
													#N/A	#N/A	#N/A
													#N/A	#N/A	#N/A
													#N/A	#N/A	#N/A
													#N/A	#N/A	#N/A
													#N/A	#N/A	#N/A
													#N/A	#N/A	#N/A
													#N/A	#N/A	#N/A
													#N/A	#N/A	#N/A
													#N/A	#N/A	#N/A
													#N/A	#N/A	#N/A
													#N/A	#N/A	#N/A
													#N/A	#N/A	#N/A
													#N/A	#N/A	#N/A
													#N/A	#N/A	#N/A
													#N/A	#N/A	#N/A
													#N/A	#N/A	#N/A
													#N/A	#N/A	#N/A
													#N/A	#N/A	#N/A
													#N/A	#N/A	#N/A
													#N/A	#N/A	#N/A
													#N/A	#N/A	#N/A
													#N/A	#N/A	#N/A
													#N/A	#N/A	#N/A
													#N/A	#N/A	#N/A
													#N/A	#N/A	#N/A
													#N/A	#N/A	#N/A
													#N/A	#N/A	#N/A
													#N/A	#N/A	#N/A
													#N/A	#N/A	#N/A
													#N/A	#N/A	#N/A
													#N/A	#N/A	#N/A
													#N/A	#N/A	#N/A
													#N/A	#N/A	#N/A
													#N/A	#N/A	#N/A
													#N/A	#N/A	#N/A
													#N/A	#N/A	#N/A
													#N/A	#N/A	#N/A
													#N/A	#N/A	#N/A
													#N/A	#N/A	#N/A
													#N/A	#N/A	#N/A
													#N/A	#N/A	#N/A
													#N/A	#N/A	#N/A
													#N/A	#N/A	#N/A
													#N/A	#N/A	#N/A
													#N/A	#N/A	#N/A
													#N/A	#N/A	#N/A
													#N/A	#N/A	#N/A
													#N/A	#N/A	#N/A
													#N/A	#N/A	#N/A
													#N/A	#N/A	#N/A
													#N/A	#N/A	#N/A
													#N/A	#N/A	#N/A
													#N/A	#N/A	#N/A
													#N/A	#N/A	#N/A
													#N/A	#N/A	#N/A
													#N/A	#N/A	#N/A
													#N/A	#N/A	#N/A
													#N/A	#N/A	#N/A
													#N/A	#N/A	#N/A
													#N/A	#N/A	#N/A
													#N/A	#N/A	#N/A
													#N/A	#N/A	#N/A
													#N/A	#N/A	#N/A
													#N/A	#N/A	#N/A
													#N/A	#N/A	#N/A
													#N/A	#N/A	#N/A
													#N/A	#N/A	#N/A
													#N/A	#N/A	#N/A
													#N/A	#N/A	#N/A
													#N/A	#N/A	#N/A
													#N/A	#N/A	#N/A
													#N/A	#N/A	#N/A
													#N/A	#N/A	#N/A
													#N/A	#N/A	#N/A
													#N/A	#N/A	#N/A
													#N/A	#N/A	#N/A
													#N/A	#N/A	#N/A
													#N/A	#N/A	#N/A
													#N/A	#N/A	#N/A
													#N/A	#N/A	#N/A
													#N/A	#N/A	#N/A
													#N/A	#N/A	#N/A
													#N/A	#N/A	#N/A
													#N/A	#N/A	#N/A
													#N/A	#N/A	#N/A
													#N/A	#N/A	#N/A
													#N/A	#N/A	#N/A
													#N/A	#N/A	#N/A
													#N/A	#N/A	#N/A
													#N/A	#N/A	#N/A
													#N/A	#N/A	#N/A
													#N/A	#N/A	#N/A
													#N/A	#N/A	#N/A
													#N/A	#N/A	#N/A
													#N/A	#N/A	#N/A
													#N/A	#N/A	#N/A
													#N/A	#N/A	#N/A
													#N/A	#N/A	#N/A
													#N/A	#N/A	#N/A
													#N/A	#N/A	#N/A
													#N/A	#N/A	#N/A
													#N/A	#N/A	#N/A
													#N/A	#N/A	#N/A
													#N/A	#N/A	#N/A
													#N/A	#N/A	#N/A
													#N/A	#N/A	#N/A
													#N/A	#N/A	#N/A
													#N/A	#N/A	#N/A
													#N/A	#N/A	#N/A
													#N/A	#N/A	#N/A
													#N/A	#N/A	#N/A
													#N/A	#N/A	#N/A
													#N/A	#N/A	#N/A
													#N/A	#N/A	#N/A
													#N/A	#N/A	#N/A
													#N/A	#N/A	#N/A
													#N/A	#N/A	#N/A
													#N/A	#N/A	#N/A
													#N/A	#N/A	#N/A
													#N/A	#N/A	#N/A
													#N/A	#N/A	#N/A
													#N/A	#N/A	#N/A
													#N/A	#N/A	#N/A
													#N/A	#N/A	#N/A
													#N/A	#N/A	#N/A
													#N/A	#N/A	#N/A
													#N/A	#N/A	#N/A
													#N/A	#N/A	#N/A
													#N/A	#N/A	#N/A
													#N/A	#N/A	#N/A
													#N/A	#N/A	#N/A
													#N/A	#N/A	#N/A
													#N/A	#N/A	#N/A
													#N/A	#N/A	#N/A
													#N/A	#N/A	#N/A
													#N/A	#N/A	#N/A
													#N/A	#N/A	#N/A
													#N/A	#N/A	#N/A
													#N/A	#N/A	#N/A
													#N/A	#N/A	#N/A
													#N/A	#N/A	#N/A
													#N/A	#N/A	#N/A
													#N/A	#N/A	#N/A
													#N/A	#N/A	#N/A
													#N/A	#N/A	#N/A
													#N/A	#N/A	#N/A
													#N/A	#N/A	#N/A
													#N/A	#N/A	#N/A
													#N/A	#N/A	#N/A
													#N/A	#N/A	#N/A
													#N/A	#N/A	#N/A
													#N/A	#N/A	#N/A
													#N/A	#N/A	#N/A
													#N/A	#N/A	#N/A
													#N/A	#N/A	#N/A
													#N/A	#N/A	#N/A
													#N/A	#N/A	#N/A
													#N/A	#N/A	#N/A
													#N/A	#N/A	#N/A
													#N/A	#N/A	#N/A
													#N/A	#N/A	#N/A
													#N/A	#N/A	#N/A
													#N/A	#N/A	#N/A
													#N/A	#N/A	#N/A
													#N/A	#N/A	#N/A
													#N/A	#N/A	#N/A
													#N/A	#N/A	#N/A
													#N/A	#N/A	#N/A
													#N/A	#N/A	#N/A
													#N/A	#N/A	#N/A
													#N/A	#N/A	#N/A
													#N/A	#N/A	#N/A
													#N/A	#N/A	#N/A
													#N/A	#N/A	#N/A
													#N/A	#N/A	#N/A
													#N/A	#N/A	#N/A
													#N/A	#N/A	#N/A
													#N/A	#N/A	#N/A
													#N/A	#N/A	#N/A
													#N/A	#N/A	#N/A
													#N/A	#N/A	#N/A
													#N/A	#N/A	#N/A
													#N/A	#N/A	#N/A
													#N/A	#N/A	#N/A
													#N/A	#N/A	#N/A
													#N/A	#N/A	#N/A
													#N/A	#N/A	#N/A
													#N/A	#N/A	#N/A
													#N/A	#N/A	#N/A
													#N/A	#N/A	#N/A
													#N/A	#N/A	#N/A
													#N/A	#N/A	#N/A
													#N/A	#N/A	#N/A
													#N/A	#N/A	#N/A
													#N/A	#N/A	#N/A
													#N/A	#N/A	#N/A
													#N/A	#N/A	#N/A
													#N/A	#N/A	#N/A
													#N/A	#N/A	#N/A
													#N/A	#N/A	#N/A
													#N/A	#N/A	#N/A
													#N/A	#N/A	#N/A
													#N/A	#N/A	#N/A
													#N/A	#N/A	#N/A
													#N/A	#N/A	#N/A
													#N/A	#N/A	#N/A
													#N/A	#N/A	#N/A
													#N/A	#N/A	#N/A
													#N/A	#N/A	#N/A
													#N/A	#N/A	#N/A
													#N/A	#N/A	#N/A
													#N/A	#N/A	#N/A
													#N/A	#N/A	#N/A
													#N/A	#N/A	#N/A
													#N/A	#N/A	#N/A
													#N/A	#N/A	#N/A
													#N/A	#N/A	#N/A
													#N/A	#N/A	#N/A
													#N/A	#N/A	#N/A
													#N/A	#N/A	#N/A
													#N/A	#N/A	#N/A
													#N/A	#N/A	#N/A
													#N/A	#N/A	#N/A
													#N/A	#N/A	#N/A
													#N/A	#N/A	#N/A
													#N/A	#N/A	#N/A
													#N/A	#N/A	#N/A
													#N/A	#N/A	#N/A
													#N/A	#N/A	#N/A
													#N/A	#N/A	#N/A
													#N/A	#N/A	#N/A
													#N/A	#N/A	#N/A
													#N/A	#N/A	#N/A
													#N/A	#N/A	#N/A
													#N/A	#N/A	#N/A
													#N/A	#N/A	#N/A
													#N/A	#N/A	#N/A
													#N/A	#N/A	#N/A
													#N/A	#N/A	#N/A
													#N/A	#N/A	#N/A
													#N/A	#N/A	#N/A
													#N/A	#N/A	#N/A
													#N/A	#N/A	#N/A
													#N/A	#N/A	#N/A
													#N/A	#N/A	#N/A
													#N/A	#N/A	#N/A
													#N/A	#N/A	#N/A
													#N/A	#N/A	#N/A
													#N/A	#N/A	#N/A
													#N/A	#N/A	#N/A
													#N/A	#N/A	#N/A
													#N/A	#N/A	#N/A
													#N/A	#N/A	#N/A
													#N/A	#N/A	#N/A
													#N/A	#N/A	#N/A
													#N/A	#N/A	#N/A
													#N/A	#N/A	#N/A
													#N/A	#N/A	#N/A
													#N/A	#N/A	#N/A
													#N/A	#N/A	#N/A
													#N/A	#N/A	#N/A
													#N/A	#N/A	#N/A
													#N/A	#N/A	#N/A
													#N/A	#N/A	#N/A
													#N/A	#N/A	#N/A
													#N/A	#N/A	#N/A
													#N/A	#N/A	#N/A
													#N/A	#N/A	#N/A
													#N/A	#N/A	#N/A
													#N/A	#N/A	#N/A
													#N/A	#N/A	#N/A
													#N/A	#N/A	#N/A
													#N/A	#N/A	#N/A
													#N/A	#N/A	#N/A
													#N/A	#N/A	#N/A
													#N/A	#N/A	#N/A
													#N/A	#N/A	#N/A
													#N/A	#N/A	#N/A
													#N/A	#N/A	#N/A
													#N/A	#N/A	#N/A
													#N/A	#N/A	#N/A
													#N/A	#N/A	#N/A
													#N/A	#N/A	#N/A
													#N/A	#N/A	#N/A
													#N/A	#N/A	#N/A
													#N/A	#N/A	#N/A
													#N/A	#N/A	#N/A
													#N/A	#N/A	#N/A
													#N/A	#N/A	#N/A
													#N/A	#N/A	#N/A
													#N/A	#N/A	#N/A
													#N/A	#N/A	#N/A
													#N/A	#N/A	#N/A
													#N/A	#N/A	#N/A
													#N/A	#N/A	#N/A
													#N/A	#N/A	#N/A
													#N/A	#N/A	#N/A
													#N/A	#N/A	#N/A
													#N/A	#N/A	#N/A
													#N/A	#N/A	#N/A
													#N/A	#N/A	#N/A
													#N/A	#N/A	#N/A
													#N/A	#N/A	#N/A
													#N/A	#N/A	#N/A
													#N/A	#N/A	#N/A
													#N/A	#N/A	#N/A
													#N/A	#N/A	#N/A
													#N/A	#N/A	#N/A
													#N/A	#N/A	#N/A
													#N/A	#N/A	#N/A
													#N/A	#N/A	#N/A
													#N/A	#N/A	#N/A
													#N/A	#N/A	#N/A
													#N/A	#N/A	#N/A
													#N/A	#N/A	#N/A
													#N/A	#N/A	#N/A
													#N/A	#N/A	#N/A
													#N/A	#N/A	#N/A
													#N/A	#N/A	#N/A
													#N/A	#N/A	#N/A
													#N/A	#N/A	#N/A
													#N/A	#N/A	#N/A
													#N/A	#N/A	#N/A
													#N/A	#N/A	#N/A
													#N/A	#N/A	#N/A
													#N/A	#N/A	#N/A
													#N/A	#N/A	#N/A
													#N/A	#N/A	#N/A
													#N/A	#N/A	#N/A
													#N/A	#N/A	#N/A
													#N/A	#N/A	#N/A
													#N/A	#N/A	#N/A
													#N/A	#N/A	#N/A
													#N/A	#N/A	#N/A
													#N/A	#N/A	#N/A
													#N/A	#N/A	#N/A
													#N/A	#N/A	#N/A
													#N/A	#N/A	#N/A
													#N/A	#N/A	#N/A
													#N/A	#N/A	#N/A
													#N/A	#N/A	#N/A
													#N/A	#N/A	#N/A
													#N/A	#N/A	#N/A
													#N/A	#N/A	#N/A
													#N/A	#N/A	#N/A
													#N/A	#N/A	#N/A
													#N/A	#N/A	#N/A
													#N/A	#N/A	#N/A
													#N/A	#N/A	#N/A
													#N/A	#N/A	#N/A
													#N/A	#N/A	#N/A
													#N/A	#N/A	#N/A
													#N/A	#N/A	#N/A
													#N/A	#N/A	#N/A
													#N/A	#N/A	#N/A
													#N/A	#N/A	#N/A
													#N/A	#N/A	#N/A
													#N/A	#N/A	#N/A
													#N/A	#N/A	#N/A
													#N/A	#N/A	#N/A
													#N/A	#N/A	#N/A
													#N/A	#N/A	#N/A
													#N/A	#N/A	#N/A
													#N/A	#N/A	#N/A
													#N/A	#N/A	#N/A
													#N/A	#N/A	#N/A
													#N/A	#N/A	#N/A
													#N/A	#N/A	#N/A
													#N/A	#N/A	#N/A
													#N/A	#N/A	#N/A
													#N/A	#N/A	#N/A
													#N/A	#N/A	#N/A
													#N/A	#N/A	#N/A
													#N/A	#N/A	#N/A
													#N/A	#N/A	#N/A
													#N/A	#N/A	#N/A
													#N/A	#N/A	#N/A
													#N/A	#N/A	#N/A
													#N/A	#N/A	#N/A
													#N/A	#N/A	#N/A
													#N/A	#N/A	#N/A
													#N/A	#N/A	#N/A
													#N/A	#N/A	#N/A
													#N/A	#N/A	#N/A
													#N/A	#N/A	#N/A
													#N/A	#N/A	#N/A
													#N/A	#N/A	#N/A
													#N/A	#N/A	#N/A
													#N/A	#N/A	#N/A
													#N/A	#N/A	#N/A
													#N/A	#N/A	#N/A
													#N/A	#N/A	#N/A
													#N/A	#N/A	#N/A
													#N/A	#N/A	#N/A
													#N/A	#N/A	#N/A
													#N/A	#N/A	#N/A
													#N/A	#N/A	#N/A
													#N/A	#N/A	#N/A
													#N/A	#N/A	#N/A
													#N/A	#N/A	#N/A
													#N/A	#N/A	#N/A
													#N/A	#N/A	#N/A
													#N/A	#N/A	#N/A
													#N/A	#N/A	#N/A
													#N/A	#N/A	#N/A
													#N/A	#N/A	#N/A
													#N/A	#N/A	#N/A
													#N/A	#N/A	#N/A
													#N/A	#N/A	#N/A
													#N/A	#N/A	#N/A
													#N/A	#N/A	#N/A
													#N/A	#N/A	#N/A
													#N/A	#N/A	#N/A
													#N/A	#N/A	#N/A
													#N/A	#N/A	#N/A
													#N/A	#N/A	#N/A
													#N/A	#N/A	#N/A
													#N/A	#N/A	#N/A
													#N/A	#N/A	#N/A
													#N/A	#N/A	#N/A
													#N/A	#N/A	#N/A
													#N/A	#N/A	#N/A
													#N/A	#N/A	#N/A
													#N/A	#N/A	#N/A
													#N/A	#N/A	#N/A
													#N/A	#N/A	#N/A
													#N/A	#N/A	#N/A
													#N/A	#N/A	#N/A
													#N/A	#N/A	#N/A
													#N/A	#N/A	#N/A
													#N/A	#N/A	#N/A
													#N/A	#N/A	#N/A
													#N/A	#N/A	#N/A
													#N/A	#N/A	#N/A
													#N/A	#N/A	#N/A
													#N/A	#N/A	#N/A
													#N/A	#N/A	#N/A
													#N/A	#N/A	#N/A
													#N/A	#N/A	#N/A
													#N/A	#N/A	#N/A
													#N/A	#N/A	#N/A
													#N/A	#N/A	#N/A
													#N/A	#N/A	#N/A
													#N/A	#N/A	#N/A
													#N/A	#N/A	#N/A
													#N/A	#N/A	#N/A
													#N/A	#N/A	#N/A
													#N/A	#N/A	#N/A
													#N/A	#N/A	#N/A
													#N/A	#N/A	#N/A
													#N/A	#N/A	#N/A
													#N/A	#N/A	#N/A
													#N/A	#N/A	#N/A
													#N/A	#N/A	#N/A
													#N/A	#N/A	#N/A
													#N/A	#N/A	#N/A
													#N/A	#N/A	#N/A
													#N/A	#N/A	#N/A
													#N/A	#N/A	#N/A
													#N/A	#N/A	#N/A
													#N/A	#N/A	#N/A
													#N/A	#N/A	#N/A
													#N/A	#N/A	#N/A
													#N/A	#N/A	#N/A
													#N/A	#N/A	#N/A
													#N/A	#N/A	#N/A
													#N/A	#N/A	#N/A
													#N/A	#N/A	#N/A
													#N/A	#N/A	#N/A
													#N/A	#N/A	#N/A
													#N/A	#N/A	#N/A
													#N/A	#N/A	#N/A
													#N/A	#N/A	#N/A
													#N/A	#N/A	#N/A
													#N/A	#N/A	#N/A
													#N/A	#N/A	#N/A
													#N/A	#N/A	#N/A
													#N/A	#N/A	#N/A
													#N/A	#N/A	#N/A
													#N/A	#N/A	#N/A
													#N/A	#N/A	#N/A
													#N/A	#N/A	#N/A
													#N/A	#N/A	#N/A
													#N/A	#N/A	#N/A
													#N/A	#N/A	#N/A
													#N/A	#N/A	#N/A
													#N/A	#N/A	#N/A
													#N/A	#N/A	#N/A
													#N/A	#N/A	#N/A
													#N/A	#N/A	#N/A
													#N/A	#N/A	#N/A
													#N/A	#N/A	#N/A
													#N/A	#N/A	#N/A
													#N/A	#N/A	#N/A
													#N/A	#N/A	#N/A
													#N/A	#N/A	#N/A
													#N/A	#N/A	#N/A
													#N/A	#N/A	#N/A
													#N/A	#N/A	#N/A
													#N/A	#N/A	#N/A
													#N/A	#N/A	#N/A
													#N/A	#N/A	#N/A
													#N/A	#N/A	#N/A
													#N/A	#N/A	#N/A
													#N/A	#N/A	#N/A
													#N/A	#N/A	#N/A
													#N/A	#N/A	#N/A
													#N/A	#N/A	#N/A
													#N/A	#N/A	#N/A
													#N/A	#N/A	#N/A
													#N/A	#N/A	#N/A
													#N/A	#N/A	#N/A
													#N/A	#N/A	#N/A
													#N/A	#N/A	#N/A
													#N/A	#N/A	#N/A
													#N/A	#N/A	#N/A
													#N/A	#N/A	#N/A
													#N/A	#N/A	#N/A
													#N/A	#N/A	#N/A
													#N/A	#N/A	#N/A
													#N/A	#N/A	#N/A
													#N/A	#N/A	#N/A
													#N/A	#N/A	#N/A
													#N/A	#N/A	#N/A
													#N/A	#N/A	#N/A
													#N/A	#N/A	#N/A
													#N/A	#N/A	#N/A
													#N/A	#N/A	#N/A
													#N/A	#N/A	#N/A
													#N/A	#N/A	#N/A
													#N/A	#N/A	#N/A
													#N/A	#N/A	#N/A
													#N/A	#N/A	#N/A
													#N/A	#N/A	#N/A
													#N/A	#N/A	#N/A
													#N/A	#N/A	#N/A
													#N/A	#N/A	#N/A
													#N/A	#N/A	#N/A
													#N/A	#N/A	#N/A
													#N/A	#N/A	#N/A
													#N/A	#N/A	#N/A
													#N/A	#N/A	#N/A
													#N/A	#N/A	#N/A
													#N/A	#N/A	#N/A
													#N/A	#N/A	#N/A
													#N/A	#N/A	#N/A
													#N/A	#N/A	#N/A
													#N/A	#N/A	#N/A
													#N/A	#N/A	#N/A
													#N/A	#N/A	#N/A
													#N/A	#N/A	#N/A
													#N/A	#N/A	#N/A
													#N/A	#N/A	#N/A
													#N/A	#N/A	#N/A
													#N/A	#N/A	#N/A
													#N/A	#N/A	#N/A
													#N/A	#N/A	#N/A
													#N/A	#N/A	#N/A
													#N/A	#N/A	#N/A
													#N/A	#N/A	#N/A
													#N/A	#N/A	#N/A
													#N/A	#N/A	#N/A
													#N/A	#N/A	#N/A
													#N/A	#N/A	#N/A
													#N/A	#N/A	#N/A
													#N/A	#N/A	#N/A
													#N/A	#N/A	#N/A
													#N/A	#N/A	#N/A
													#N/A	#N/A	#N/A
													#N/A	#N/A	#N/A
													#N/A	#N/A	#N/A
													#N/A	#N/A	#N/A
													#N/A	#N/A	#N/A
													#N/A	#N/A	#N/A
													#N/A	#N/A	#N/A
													#N/A	#N/A	#N/A
													#N/A	#N/A	#N/A
													#N/A	#N/A	#N/A
													#N/A	#N/A	#N/A
													#N/A	#N/A	#N/A
													#N/A	#N/A	#N/A
													#N/A	#N/A	#N/A
													#N/A	#N/A	#N/A
													#N/A	#N/A	#N/A
													#N/A	#N/A	#N/A
													#N/A	#N/A	#N/A
													#N/A	#N/A	#N/A
													#N/A	#N/A	#N/A
													#N/A	#N/A	#N/A
													#N/A	#N/A	#N/A
													#N/A	#N/A	#N/A
													#N/A	#N/A	#N/A
													#N/A	#N/A	#N/A
													#N/A	#N/A	#N/A
													#N/A	#N/A	#N/A
													#N/A	#N/A	#N/A
													#N/A	#N/A	#N/A
													#N/A	#N/A	#N/A
													#N/A	#N/A	#N/A
													#N/A	#N/A	#N/A
													#N/A	#N/A	#N/A
													#N/A	#N/A	#N/A
													#N/A	#N/A	#N/A
													#N/A	#N/A	#N/A
													#N/A	#N/A	#N/A
													#N/A	#N/A	#N/A
													#N/A	#N/A	#N/A
													#N/A	#N/A	#N/A
													#N/A	#N/A	#N/A
													#N/A	#N/A	#N/A
													#N/A	#N/A	#N/A
													#N/A	#N/A	#N/A
													#N/A	#N/A	#N/A
													#N/A	#N/A	#N/A
													#N/A	#N/A	#N/A
													#N/A	#N/A	#N/A
													#N/A	#N/A	#N/A
													#N/A	#N/A	#N/A
													#N/A	#N/A	#N/A
													#N/A	#N/A	#N/A
													#N/A	#N/A	#N/A
													#N/A	#N/A	#N/A
													#N/A	#N/A	#N/A
													#N/A	#N/A	#N/A
													#N/A	#N/A	#N/A
													#N/A	#N/A	#N/A
													#N/A	#N/A	#N/A
													#N/A	#N/A	#N/A
													#N/A	#N/A	#N/A
													#N/A	#N/A	#N/A
													#N/A	#N/A	#N/A
													#N/A	#N/A	#N/A
													#N/A	#N/A	#N/A
													#N/A	#N/A	#N/A
													#N/A	#N/A	#N/A
													#N/A	#N/A	#N/A
													#N/A	#N/A	#N/A
													#N/A	#N/A	#N/A
													#N/A	#N/A	#N/A
													#N/A	#N/A	#N/A
													#N/A	#N/A	#N/A
													#N/A	#N/A	#N/A
													#N/A	#N/A	#N/A
													#N/A	#N/A	#N/A
													#N/A	#N/A	#N/A
													#N/A	#N/A	#N/A
													#N/A	#N/A	#N/A
													#N/A	#N/A	#N/A
													#N/A	#N/A	#N/A
													#N/A	#N/A	#N/A
													#N/A	#N/A	#N/A
													#N/A	#N/A	#N/A
													#N/A	#N/A	#N/A
													#N/A	#N/A	#N/A
													#N/A	#N/A	#N/A
													#N/A	#N/A	#N/A
													#N/A	#N/A	#N/A
													#N/A	#N/A	#N/A
													#N/A	#N/A	#N/A
													#N/A	#N/A	#N/A
													#N/A	#N/A	#N/A
													#N/A	#N/A	#N/A
													#N/A	#N/A	#N/A
													#N/A	#N/A	#N/A
													#N/A	#N/A	#N/A
													#N/A	#N/A	#N/A
													#N/A	#N/A	#N/A
													#N/A	#N/A	#N/A
													#N/A	#N/A	#N/A
													#N/A	#N/A	#N/A
													#N/A	#N/A	#N/A
													#N/A	#N/A	#N/A
													#N/A	#N/A	#N/A
													#N/A	#N/A	#N/A
													#N/A	#N/A	#N/A
													#N/A	#N/A	#N/A
													#N/A	#N/A	#N/A
													#N/A	#N/A	#N/A
													#N/A	#N/A	#N/A
													#N/A	#N/A	#N/A
													#N/A	#N/A	#N/A
													#N/A	#N/A	#N/A
													#N/A	#N/A	#N/A
													#N/A	#N/A	#N/A
													#N/A	#N/A	#N/A
													#N/A	#N/A	#N/A
													#N/A	#N/A	#N/A
													#N/A	#N/A	#N/A
													#N/A	#N/A	#N/A
													#N/A	#N/A	#N/A
													#N/A	#N/A	#N/A
													#N/A	#N/A	#N/A
													#N/A	#N/A	#N/A
													#N/A	#N/A	#N/A
													#N/A	#N/A	#N/A
													#N/A	#N/A	#N/A
													#N/A	#N/A	#N/A
													#N/A	#N/A	#N/A
													#N/A	#N/A	#N/A
													#N/A	#N/A	#N/A
													#N/A	#N/A	#N/A
													#N/A	#N/A	#N/A
													#N/A	#N/A	#N/A
													#N/A	#N/A	#N/A
													#N/A	#N/A	#N/A
													#N/A	#N/A	#N/A
													#N/A	#N/A	#N/A
													#N/A	#N/A	#N/A
													#N/A	#N/A	#N/A
													#N/A	#N/A	#N/A
													#N/A	#N/A	#N/A
													#N/A	#N/A	#N/A
													#N/A	#N/A	#N/A
													#N/A	#N/A	#N/A
													#N/A	#N/A	#N/A
													#N/A	#N/A	#N/A
													#N/A	#N/A	#N/A
													#N/A	#N/A	#N/A
													#N/A	#N/A	#N/A
													#N/A	#N/A	#N/A
													#N/A	#N/A	#N/A
													#N/A	#N/A	#N/A
													#N/A	#N/A	#N/A
													#N/A	#N/A	#N/A
													#N/A	#N/A	#N/A
													#N/A	#N/A	#N/A
													#N/A	#N/A	#N/A
													#N/A	#N/A	#N/A
													#N/A	#N/A	#N/A
													#N/A	#N/A	#N/A
													#N/A	#N/A	#N/A
													#N/A	#N/A	#N/A
													#N/A	#N/A	#N/A
													#N/A	#N/A	#N/A
													#N/A	#N/A	#N/A
													#N/A	#N/A	#N/A
													#N/A	#N/A	#N/A
													#N/A	#N/A	#N/A
													#N/A	#N/A	#N/A
													#N/A	#N/A	#N/A
													#N/A	#N/A	#N/A
													#N/A	#N/A	#N/A
													#N/A	#N/A	#N/A
													#N/A	#N/A	#N/A
													#N/A	#N/A	#N/A
													#N/A	#N/A	#N/A
													#N/A	#N/A	#N/A
													#N/A	#N/A	#N/A
													#N/A	#N/A	#N/A
													#N/A	#N/A	#N/A
													#N/A	#N/A	#N/A
													#N/A	#N/A	#N/A
													#N/A	#N/A	#N/A
													#N/A	#N/A	#N/A
													#N/A	#N/A	#N/A
													#N/A	#N/A	#N/A
													#N/A	#N/A	#N/A
													#N/A	#N/A	#N/A
													#N/A	#N/A	#N/A
													#N/A	#N/A	#N/A
													#N/A	#N/A	#N/A
													#N/A	#N/A	#N/A
													#N/A	#N/A	#N/A
													#N/A	#N/A	#N/A
													#N/A	#N/A	#N/A
													#N/A	#N/A	#N/A
													#N/A	#N/A	#N/A
													#N/A	#N/A	#N/A
													#N/A	#N/A	#N/A
													#N/A	#N/A	#N/A
													#N/A	#N/A	#N/A
													#N/A	#N/A	#N/A
													#N/A	#N/A	#N/A
													#N/A	#N/A	#N/A
													#N/A	#N/A	#N/A
													#N/A	#N/A	#N/A
													#N/A	#N/A	#N/A
													#N/A	#N/A	#N/A
													#N/A	#N/A	#N/A
													#N/A	#N/A	#N/A
													#N/A	#N/A	#N/A
													#N/A	#N/A	#N/A
													#N/A	#N/A	#N/A
													#N/A	#N/A	#N/A
													#N/A	#N/A	#N/A
													#N/A	#N/A	#N/A
													#N/A	#N/A	#N/A
													#N/A	#N/A	#N/A
													#N/A	#N/A	#N/A
													#N/A	#N/A	#N/A
													#N/A	#N/A	#N/A
													#N/A	#N/A	#N/A
													#N/A	#N/A	#N/A
													#N/A	#N/A	#N/A
													#N/A	#N/A	#N/A
													#N/A	#N/A	#N/A
													#N/A	#N/A	#N/A
													#N/A	#N/A	#N/A
													#N/A	#N/A	#N/A
													#N/A	#N/A	#N/A
													#N/A	#N/A	#N/A
													#N/A	#N/A	#N/A
													#N/A	#N/A	#N/A
													#N/A	#N/A	#N/A
													#N/A	#N/A	#N/A
													#N/A	#N/A	#N/A
													#N/A	#N/A	#N/A
													#N/A	#N/A	#N/A
													#N/A	#N/A	#N/A
													#N/A	#N/A	#N/A
													#N/A	#N/A	#N/A
													#N/A	#N/A	#N/A
													#N/A	#N/A	#N/A
													#N/A	#N/A	#N/A
													#N/A	#N/A	#N/A
													#N/A	#N/A	#N/A
													#N/A	#N/A	#N/A
													#N/A	#N/A	#N/A
													#N/A	#N/A	#N/A
													#N/A	#N/A	#N/A
													#N/A	#N/A	#N/A
													#N/A	#N/A	#N/A
													#N/A	#N/A	#N/A
													#N/A	#N/A	#N/A
													#N/A	#N/A	#N/A
													#N/A	#N/A	#N/A
													#N/A	#N/A	#N/A
													#N/A	#N/A	#N/A
													#N/A	#N/A	#N/A
													#N/A	#N/A	#N/A
													#N/A	#N/A	#N/A
													#N/A	#N/A	#N/A
													#N/A	#N/A	#N/A
													#N/A	#N/A	#N/A
													#N/A	#N/A	#N/A
													#N/A	#N/A	#N/A
													#N/A	#N/A	#N/A
													#N/A	#N/A	#N/A
													#N/A	#N/A	#N/A
													#N/A	#N/A	#N/A
													#N/A	#N/A	#N/A
													#N/A	#N/A	#N/A
													#N/A	#N/A	#N/A
													#N/A	#N/A	#N/A
													#N/A	#N/A	#N/A
													#N/A	#N/A	#N/A
													#N/A	#N/A	#N/A
													#N/A	#N/A	#N/A
													#N/A	#N/A	#N/A
													#N/A	#N/A	#N/A
													#N/A	#N/A	#N/A
													#N/A	#N/A	#N/A
													#N/A	#N/A	#N/A
													#N/A	#N/A	#N/A
													#N/A	#N/A	#N/A
													#N/A	#N/A	#N/A
													#N/A	#N/A	#N/A
													#N/A	#N/A	#N/A
													#N/A	#N/A	#N/A
													#N/A	#N/A	#N/A
													#N/A	#N/A	#N/A
													#N/A	#N/A	#N/A
													#N/A	#N/A	#N/A
													#N/A	#N/A	#N/A
													#N/A	#N/A	#N/A
													#N/A	#N/A	#N/A
													#N/A	#N/A	#N/A
													#N/A	#N/A	#N/A
													#N/A	#N/A	#N/A
													#N/A	#N/A	#N/A
													#N/A	#N/A	#N/A
													#N/A	#N/A	#N/A
													#N/A	#N/A	#N/A
													#N/A	#N/A	#N/A
													#N/A	#N/A	#N/A
													#N/A	#N/A	#N/A
													#N/A	#N/A	#N/A
													#N/A	#N/A	#N/A
													#N/A	#N/A	#N/A
													#N/A	#N/A	#N/A
													#N/A	#N/A	#N/A
													#N/A	#N/A	#N/A
													#N/A	#N/A	#N/A
													#N/A	#N/A	#N/A
													#N/A	#N/A	#N/A
													#N/A	#N/A	#N/A
													#N/A	#N/A	#N/A
													#N/A	#N/A	#N/A
													#N/A	#N/A	#N/A
													#N/A	#N/A	#N/A
													#N/A	#N/A	#N/A
													#N/A	#N/A	#N/A
													#N/A	#N/A	#N/A
													#N/A	#N/A	#N/A
													#N/A	#N/A	#N/A
													#N/A	#N/A	#N/A
													#N/A	#N/A	#N/A
													#N/A	#N/A	#N/A
													#N/A	#N/A	#N/A
													#N/A	#N/A	#N/A
													#N/A	#N/A	#N/A
													#N/A	#N/A	#N/A
													#N/A	#N/A	#N/A
													#N/A	#N/A	#N/A
													#N/A	#N/A	#N/A
													#N/A	#N/A	#N/A
													#N/A	#N/A	#N/A
													#N/A	#N/A	#N/A
													#N/A	#N/A	#N/A
													#N/A	#N/A	#N/A
													#N/A	#N/A	#N/A
													#N/A	#N/A	#N/A
													#N/A	#N/A	#N/A
													#N/A	#N/A	#N/A
													#N/A	#N/A	#N/A
													#N/A	#N/A	#N/A
													#N/A	#N/A	#N/A
													#N/A	#N/A	#N/A
													#N/A	#N/A	#N/A
													#N/A	#N/A	#N/A
													#N/A	#N/A	#N/A
													#N/A	#N/A	#N/A
													#N/A	#N/A	#N/A
													#N/A	#N/A	#N/A
													#N/A	#N/A	#N/A
													#N/A	#N/A	#N/A
													#N/A	#N/A	#N/A
													#N/A	#N/A	#N/A
													#N/A	#N/A	#N/A
													#N/A	#N/A	#N/A
													#N/A	#N/A	#N/A
													#N/A	#N/A	#N/A
													#N/A	#N/A	#N/A
													#N/A	#N/A	#N/A
													#N/A	#N/A	#N/A
													#N/A	#N/A	#N/A
													#N/A	#N/A	#N/A
													#N/A	#N/A	#N/A
													#N/A	#N/A	#N/A
													#N/A	#N/A	#N/A
													#N/A	#N/A	#N/A
													#N/A	#N/A	#N/A
													#N/A	#N/A	#N/A
													#N/A	#N/A	#N/A
													#N/A	#N/A	#N/A
													#N/A	#N/A	#N/A
													#N/A	#N/A	#N/A
													#N/A	#N/A	#N/A
													#N/A	#N/A	#N/A
													#N/A	#N/A	#N/A
													#N/A	#N/A	#N/A
													#N/A	#N/A	#N/A
													#N/A	#N/A	#N/A
													#N/A	#N/A	#N/A
													#N/A	#N/A	#N/A
													#N/A	#N/A	#N/A
													#N/A	#N/A	#N/A
													#N/A	#N/A	#N/A
													#N/A	#N/A	#N/A
													#N/A	#N/A	#N/A
													#N/A	#N/A	#N/A
													#N/A	#N/A	#N/A
													#N/A	#N/A	#N/A
													#N/A	#N/A	#N/A
													#N/A	#N/A	#N/A
													#N/A	#N/A	#N/A
													#N/A	#N/A	#N/A
													#N/A	#N/A	#N/A
													#N/A	#N/A	#N/A
													#N/A	#N/A	#N/A
													#N/A	#N/A	#N/A
													#N/A	#N/A	#N/A
													#N/A	#N/A	#N/A
													#N/A	#N/A	#N/A
													#N/A	#N/A	#N/A
													#N/A	#N/A	#N/A
													#N/A	#N/A	#N/A
													#N/A	#N/A	#N/A
													#N/A	#N/A	#N/A
													#N/A	#N/A	#N/A
													#N/A	#N/A	#N/A
													#N/A	#N/A	#N/A
													#N/A	#N/A	#N/A
													#N/A	#N/A	#N/A
													#N/A	#N/A	#N/A
													#N/A	#N/A	#N/A
													#N/A	#N/A	#N/A
													#N/A	#N/A	#N/A
													#N/A	#N/A	#N/A
													#N/A	#N/A	#N/A
													#N/A	#N/A	#N/A
													#N/A	#N/A	#N/A
													#N/A	#N/A	#N/A
													#N/A	#N/A	#N/A
													#N/A	#N/A	#N/A
													#N/A	#N/A	#N/A
													#N/A	#N/A	#N/A
													#N/A	#N/A	#N/A
													#N/A	#N/A	#N/A
													#N/A	#N/A	#N/A
													#N/A	#N/A	#N/A
													#N/A	#N/A	#N/A
													#N/A	#N/A	#N/A
													#N/A	#N/A	#N/A
													#N/A	#N/A	#N/A
													#N/A	#N/A	#N/A
													#N/A	#N/A	#N/A
													#N/A	#N/A	#N/A
													#N/A	#N/A	#N/A
													#N/A	#N/A	#N/A
													#N/A	#N/A	#N/A
													#N/A	#N/A	#N/A
													#N/A	#N/A	#N/A
													#N/A	#N/A	#N/A
													#N/A	#N/A	#N/A
													#N/A	#N/A	#N/A
													#N/A	#N/A	#N/A
													#N/A	#N/A	#N/A
													#N/A	#N/A	#N/A
													#N/A	#N/A	#N/A
													#N/A	#N/A	#N/A
													#N/A	#N/A	#N/A
													#N/A	#N/A	#N/A
													#N/A	#N/A	#N/A
													#N/A	#N/A	#N/A
													#N/A	#N/A	#N/A
													#N/A	#N/A	#N/A
													#N/A	#N/A	#N/A
													#N/A	#N/A	#N/A
													#N/A	#N/A	#N/A
													#N/A	#N/A	#N/A
													#N/A	#N/A	#N/A
													#N/A	#N/A	#N/A
													#N/A	#N/A	#N/A
													#N/A	#N/A	#N/A
													#N/A	#N/A	#N/A
													#N/A	#N/A	#N/A
													#N/A	#N/A	#N/A
													#N/A	#N/A	#N/A
													#N/A	#N/A	#N/A
													#N/A	#N/A	#N/A
													#N/A	#N/A	#N/A
													#N/A	#N/A	#N/A
													#N/A	#N/A	#N/A
													#N/A	#N/A	#N/A
													#N/A	#N/A	#N/A
													#N/A	#N/A	#N/A
													#N/A	#N/A	#N/A
													#N/A	#N/A	#N/A
													#N/A	#N/A	#N/A
													#N/A	#N/A	#N/A
													#N/A	#N/A	#N/A
													#N/A	#N/A	#N/A
													#N/A	#N/A	#N/A
													#N/A	#N/A	#N/A
													#N/A	#N/A	#N/A
													#N/A	#N/A	#N/A
													#N/A	#N/A	#N/A
													#N/A	#N/A	#N/A
													#N/A	#N/A	#N/A
													#N/A	#N/A	#N/A
													#N/A	#N/A	#N/A
													#N/A	#N/A	#N/A
													#N/A	#N/A	#N/A
													#N/A	#N/A	#N/A
													#N/A	#N/A	#N/A
													#N/A	#N/A	#N/A
													#N/A	#N/A	#N/A
													#N/A	#N/A	#N/A
													#N/A	#N/A	#N/A
													#N/A	#N/A	#N/A
													#N/A	#N/A	#N/A
													#N/A	#N/A	#N/A
													#N/A	#N/A	#N/A
													#N/A	#N/A	#N/A
													#N/A	#N/A	#N/A
													#N/A	#N/A	#N/A
													#N/A	#N/A	#N/A
													#N/A	#N/A	#N/A
													#N/A	#N/A	#N/A
													#N/A	#N/A	#N/A
													#N/A	#N/A	#N/A
													#N/A	#N/A	#N/A
													#N/A	#N/A	#N/A
													#N/A	#N/A	#N/A
													#N/A	#N/A	#N/A
													#N/A	#N/A	#N/A
													#N/A	#N/A	#N/A
													#N/A	#N/A	#N/A
													#N/A	#N/A	#N/A
													#N/A	#N/A	#N/A
													#N/A	#N/A	#N/A
													#N/A	#N/A	#N/A
													#N/A	#N/A	#N/A
													#N/A	#N/A	#N/A
													#N/A	#N/A	#N/A
													#N/A	#N/A	#N/A
													#N/A	#N/A	#N/A
													#N/A	#N/A	#N/A
													#N/A	#N/A	#N/A
													#N/A	#N/A	#N/A
													#N/A	#N/A	#N/A
													#N/A	#N/A	#N/A
													#N/A	#N/A	#N/A
													#N/A	#N/A	#N/A
													#N/A	#N/A	#N/A
													#N/A	#N/A	#N/A
													#N/A	#N/A	#N/A
													#N/A	#N/A	#N/A
													#N/A	#N/A	#N/A
													#N/A	#N/A	#N/A
													#N/A	#N/A	#N/A
													#N/A	#N/A	#N/A
													#N/A	#N/A	#N/A
													#N/A	#N/A	#N/A
													#N/A	#N/A	#N/A
													#N/A	#N/A	#N/A
													#N/A	#N/A	#N/A
													#N/A	#N/A	#N/A
													#N/A	#N/A	#N/A
													#N/A	#N/A	#N/A
													#N/A	#N/A	#N/A
													#N/A	#N/A	#N/A
													#N/A	#N/A	#N/A
													#N/A	#N/A	#N/A
													#N/A	#N/A	#N/A
													#N/A	#N/A	#N/A
													#N/A	#N/A	#N/A
													#N/A	#N/A	#N/A
													#N/A	#N/A	#N/A
													#N/A	#N/A	#N/A
													#N/A	#N/A	#N/A
													#N/A	#N/A	#N/A
													#N/A	#N/A	#N/A
													#N/A	#N/A	#N/A
													#N/A	#N/A	#N/A
													#N/A	#N/A	#N/A
													#N/A	#N/A	#N/A
													#N/A	#N/A	#N/A
													#N/A	#N/A	#N/A
													#N/A	#N/A	#N/A
													#N/A	#N/A	#N/A
													#N/A	#N/A	#N/A
													#N/A	#N/A	#N/A
													#N/A	#N/A	#N/A
													#N/A	#N/A	#N/A
													#N/A	#N/A	#N/A
													#N/A	#N/A	#N/A
													#N/A	#N/A	#N/A
													#N/A	#N/A	#N/A
													#N/A	#N/A	#N/A
													#N/A	#N/A	#N/A
													#N/A	#N/A	#N/A
													#N/A	#N/A	#N/A
													#N/A	#N/A	#N/A
													#N/A	#N/A	#N/A
													#N/A	#N/A	#N/A
													#N/A	#N/A	#N/A
													#N/A	#N/A	#N/A
													#N/A	#N/A	#N/A
													#N/A	#N/A	#N/A
													#N/A	#N/A	#N/A
													#N/A	#N/A	#N/A
													#N/A	#N/A	#N/A
													#N/A	#N/A	#N/A
													#N/A	#N/A	#N/A
													#N/A	#N/A	#N/A
													#N/A	#N/A	#N/A
													#N/A	#N/A	#N/A
													#N/A	#N/A	#N/A
													#N/A	#N/A	#N/A
													#N/A	#N/A	#N/A
													#N/A	#N/A	#N/A
													#N/A	#N/A	#N/A
													#N/A	#N/A	#N/A
													#N/A	#N/A	#N/A
													#N/A	#N/A	#N/A
													#N/A	#N/A	#N/A
													#N/A	#N/A	#N/A
													#N/A	#N/A	#N/A
													#N/A	#N/A	#N/A
													#N/A	#N/A	#N/A
													#N/A	#N/A	#N/A
													#N/A	#N/A	#N/A
													#N/A	#N/A	#N/A
													#N/A	#N/A	#N/A
													#N/A	#N/A	#N/A
													#N/A	#N/A	#N/A
													#N/A	#N/A	#N/A
													#N/A	#N/A	#N/A
													#N/A	#N/A	#N/A
													#N/A	#N/A	#N/A
													#N/A	#N/A	#N/A
													#N/A	#N/A	#N/A
													#N/A	#N/A	#N/A
													#N/A	#N/A	#N/A
													#N/A	#N/A	#N/A
													#N/A	#N/A	#N/A
													#N/A	#N/A	#N/A
													#N/A	#N/A	#N/A
													#N/A	#N/A	#N/A
													#N/A	#N/A	#N/A
													#N/A	#N/A	#N/A
													#N/A	#N/A	#N/A
													#N/A	#N/A	#N/A
													#N/A	#N/A	#N/A
													#N/A	#N/A	#N/A
													#N/A	#N/A	#N/A
													#N/A	#N/A	#N/A
													#N/A	#N/A	#N/A
													#N/A	#N/A	#N/A
													#N/A	#N/A	#N/A
													#N/A	#N/A	#N/A
													#N/A	#N/A	#N/A
													#N/A	#N/A	#N/A
													#N/A	#N/A	#N/A
													#N/A	#N/A	#N/A
													#N/A	#N/A	#N/A
													#N/A	#N/A	#N/A
													#N/A	#N/A	#N/A
													#N/A	#N/A	#N/A
													#N/A	#N/A	#N/A
													#N/A	#N/A	#N/A
													#N/A	#N/A	#N/A
													#N/A	#N/A	#N/A
													#N/A	#N/A	#N/A
													#N/A	#N/A	#N/A
													#N/A	#N/A	#N/A
													#N/A	#N/A	#N/A
													#N/A	#N/A	#N/A
													#N/A	#N/A	#N/A
													#N/A	#N/A	#N/A
													#N/A	#N/A	#N/A
													#N/A	#N/A	#N/A
													#N/A	#N/A	#N/A
													#N/A	#N/A	#N/A
													#N/A	#N/A	#N/A
													#N/A	#N/A	#N/A
													#N/A	#N/A	#N/A
													#N/A	#N/A	#N/A
													#N/A	#N/A	#N/A
													#N/A	#N/A	#N/A
													#N/A	#N/A	#N/A
													#N/A	#N/A	#N/A
													#N/A	#N/A	#N/A
													#N/A	#N/A	#N/A
													#N/A	#N/A	#N/A
													#N/A	#N/A	#N/A
													#N/A	#N/A	#N/A
													#N/A	#N/A	#N/A
													#N/A	#N/A	#N/A
													#N/A	#N/A	#N/A
													#N/A	#N/A	#N/A
													#N/A	#N/A	#N/A
													#N/A	#N/A	#N/A
													#N/A	#N/A	#N/A
													#N/A	#N/A	#N/A
													#N/A	#N/A	#N/A
													#N/A	#N/A	#N/A
													#N/A	#N/A	#N/A
													#N/A	#N/A	#N/A
													#N/A	#N/A	#N/A
													#N/A	#N/A	#N/A
													#N/A	#N/A	#N/A
													#N/A	#N/A	#N/A
													#N/A	#N/A	#N/A
													#N/A	#N/A	#N/A
													#N/A	#N/A	#N/A
													#N/A	#N/A	#N/A
													#N/A	#N/A	#N/A
													#N/A	#N/A	#N/A
													#N/A	#N/A	#N/A
													#N/A	#N/A	#N/A
													#N/A	#N/A	#N/A
													#N/A	#N/A	#N/A
													#N/A	#N/A	#N/A
													#N/A	#N/A	#N/A
													#N/A	#N/A	#N/A
													#N/A	#N/A	#N/A
													#N/A	#N/A	#N/A
													#N/A	#N/A	#N/A
													#N/A	#N/A	#N/A
													#N/A	#N/A	#N/A
													#N/A	#N/A	#N/A
													#N/A	#N/A	#N/A
													#N/A	#N/A	#N/A
													#N/A	#N/A	#N/A
													#N/A	#N/A	#N/A
													#N/A	#N/A	#N/A
													#N/A	#N/A	#N/A
													#N/A	#N/A	#N/A
													#N/A	#N/A	#N/A
													#N/A	#N/A	#N/A
													#N/A	#N/A	#N/A
													#N/A	#N/A	#N/A
													#N/A	#N/A	#N/A
													#N/A	#N/A	#N/A
													#N/A	#N/A	#N/A
													#N/A	#N/A	#N/A
													#N/A	#N/A	#N/A
													#N/A	#N/A	#N/A
													#N/A	#N/A	#N/A
													#N/A	#N/A	#N/A
													#N/A	#N/A	#N/A
													#N/A	#N/A	#N/A
													#N/A	#N/A	#N/A
													#N/A	#N/A	#N/A
													#N/A	#N/A	#N/A
													#N/A	#N/A	#N/A
													#N/A	#N/A	#N/A
													#N/A	#N/A	#N/A
													#N/A	#N/A	#N/A
													#N/A	#N/A	#N/A
													#N/A	#N/A	#N/A
													#N/A	#N/A	#N/A
													#N/A	#N/A	#N/A
													#N/A	#N/A	#N/A
													#N/A	#N/A	#N/A
													#N/A	#N/A	#N/A
													#N/A	#N/A	#N/A
													#N/A	#N/A	#N/A
													#N/A	#N/A	#N/A
													#N/A	#N/A	#N/A
													#N/A	#N/A	#N/A
													#N/A	#N/A	#N/A
													#N/A	#N/A	#N/A
													#N/A	#N/A	#N/A
													#N/A	#N/A	#N/A
													#N/A	#N/A	#N/A
													#N/A	#N/A	#N/A
													#N/A	#N/A	#N/A
													#N/A	#N/A	#N/A
													#N/A	#N/A	#N/A
													#N/A	#N/A	#N/A
													#N/A	#N/A	#N/A
													#N/A	#N/A	#N/A
													#N/A	#N/A	#N/A
													#N/A	#N/A	#N/A
													#N/A	#N/A	#N/A
													#N/A	#N/A	#N/A
													#N/A	#N/A	#N/A
													#N/A	#N/A	#N/A
													#N/A	#N/A	#N/A
													#N/A	#N/A	#N/A
													#N/A	#N/A	#N/A
													#N/A	#N/A	#N/A
													#N/A	#N/A	#N/A
													#N/A	#N/A	#N/A
													#N/A	#N/A	#N/A
													#N/A	#N/A	#N/A
													#N/A	#N/A	#N/A
													#N/A	#N/A	#N/A
													#N/A	#N/A	#N/A
													#N/A	#N/A	#N/A
													#N/A	#N/A	#N/A
													#N/A	#N/A	#N/A
													#N/A	#N/A	#N/A
													#N/A	#N/A	#N/A
													#N/A	#N/A	#N/A
													#N/A	#N/A	#N/A
													#N/A	#N/A	#N/A
													#N/A	#N/A	#N/A
													#N/A	#N/A	#N/A
													#N/A	#N/A	#N/A
													#N/A	#N/A	#N/A
													#N/A	#N/A	#N/A
													#N/A	#N/A	#N/A
													#N/A	#N/A	#N/A
													#N/A	#N/A	#N/A
													#N/A	#N/A	#N/A
													#N/A	#N/A	#N/A
													#N/A	#N/A	#N/A
													#N/A	#N/A	#N/A
													#N/A	#N/A	#N/A
													#N/A	#N/A	#N/A
													#N/A	#N/A	#N/A
													#N/A	#N/A	#N/A
													#N/A	#N/A	#N/A
													#N/A	#N/A	#N/A
													#N/A	#N/A	#N/A
													#N/A	#N/A	#N/A
													#N/A	#N/A	#N/A
													#N/A	#N/A	#N/A
													#N/A	#N/A	#N/A
													#N/A	#N/A	#N/A
													#N/A	#N/A	#N/A
													#N/A	#N/A	#N/A
													#N/A	#N/A	#N/A
													#N/A	#N/A	#N/A
													#N/A	#N/A	#N/A
													#N/A	#N/A	#N/A
													#N/A	#N/A	#N/A
													#N/A	#N/A	#N/A
													#N/A	#N/A	#N/A
													#N/A	#N/A	#N/A
													#N/A	#N/A	#N/A
													#N/A	#N/A	#N/A
													#N/A	#N/A	#N/A
													#N/A	#N/A	#N/A
													#N/A	#N/A	#N/A
													#N/A	#N/A	#N/A
													#N/A	#N/A	#N/A
													#N/A	#N/A	#N/A
													#N/A	#N/A	#N/A
													#N/A	#N/A	#N/A
													#N/A	#N/A	#N/A
													#N/A	#N/A	#N/A
													#N/A	#N/A	#N/A
													#N/A	#N/A	#N/A
													#N/A	#N/A	#N/A
													#N/A	#N/A	#N/A
													#N/A	#N/A	#N/A
													#N/A	#N/A	#N/A
													#N/A	#N/A	#N/A
													#N/A	#N/A	#N/A
													#N/A	#N/A	#N/A
													#N/A	#N/A	#N/A
													#N/A	#N/A	#N/A
													#N/A	#N/A	#N/A
													#N/A	#N/A	#N/A
													#N/A	#N/A	#N/A
													#N/A	#N/A	#N/A
													#N/A	#N/A	#N/A
													#N/A	#N/A	#N/A
													#N/A	#N/A	#N/A
													#N/A	#N/A	#N/A
													#N/A	#N/A	#N/A
													#N/A	#N/A	#N/A
													#N/A	#N/A	#N/A
													#N/A	#N/A	#N/A
													#N/A	#N/A	#N/A
													#N/A	#N/A	#N/A
													#N/A	#N/A	#N/A
													#N/A	#N/A	#N/A
													#N/A	#N/A	#N/A
													#N/A	#N/A	#N/A
													#N/A	#N/A	#N/A
													#N/A	#N/A	#N/A
													#N/A	#N/A	#N/A
													#N/A	#N/A	#N/A
													#N/A	#N/A	#N/A
													#N/A	#N/A	#N/A
													#N/A	#N/A	#N/A
													#N/A	#N/A	#N/A
													#N/A	#N/A	#N/A
													#N/A	#N/A	#N/A
													#N/A	#N/A	#N/A
													#N/A	#N/A	#N/A
													#N/A	#N/A	#N/A
													#N/A	#N/A	#N/A
													#N/A	#N/A	#N/A
													#N/A	#N/A	#N/A
													#N/A	#N/A	#N/A
													#N/A	#N/A	#N/A
													#N/A	#N/A	#N/A
													#N/A	#N/A	#N/A
													#N/A	#N/A	#N/A
													#N/A	#N/A	#N/A
													#N/A	#N/A	#N/A
													#N/A	#N/A	#N/A
													#N/A	#N/A	#N/A
													#N/A	#N/A	#N/A
													#N/A	#N/A	#N/A
													#N/A	#N/A	#N/A
													#N/A	#N/A	#N/A
													#N/A	#N/A	#N/A
													#N/A	#N/A	#N/A
													#N/A	#N/A	#N/A
													#N/A	#N/A	#N/A
													#N/A	#N/A	#N/A
													#N/A	#N/A	#N/A
													#N/A	#N/A	#N/A
													#N/A	#N/A	#N/A
													#N/A	#N/A	#N/A
													#N/A	#N/A	#N/A
													#N/A	#N/A	#N/A
													#N/A	#N/A	#N/A
													#N/A	#N/A	#N/A
													#N/A	#N/A	#N/A
													#N/A	#N/A	#N/A
													#N/A	#N/A	#N/A
													#N/A	#N/A	#N/A
													#N/A	#N/A	#N/A
													#N/A	#N/A	#N/A
													#N/A	#N/A	#N/A
													#N/A	#N/A	#N/A
													#N/A	#N/A	#N/A
													#N/A	#N/A	#N/A
													#N/A	#N/A	#N/A
													#N/A	#N/A	#N/A
													#N/A	#N/A	#N/A
													#N/A	#N/A	#N/A
													#N/A	#N/A	#N/A
													#N/A	#N/A	#N/A
													#N/A	#N/A	#N/A
													#N/A	#N/A	#N/A
													#N/A	#N/A	#N/A
													#N/A	#N/A	#N/A
													#N/A	#N/A	#N/A
													#N/A	#N/A	#N/A
													#N/A	#N/A	#N/A
													#N/A	#N/A	#N/A
													#N/A	#N/A	#N/A
													#N/A	#N/A	#N/A
													#N/A	#N/A	#N/A
													#N/A	#N/A	#N/A
													#N/A	#N/A	#N/A
													#N/A	#N/A	#N/A
													#N/A	#N/A	#N/A
													#N/A	#N/A	#N/A
													#N/A	#N/A	#N/A
													#N/A	#N/A	#N/A
													#N/A	#N/A	#N/A
													#N/A	#N/A	#N/A
													#N/A	#N/A	#N/A
													#N/A	#N/A	#N/A
													#N/A	#N/A	#N/A
													#N/A	#N/A	#N/A
													#N/A	#N/A	#N/A
													#N/A	#N/A	#N/A
													#N/A	#N/A	#N/A
													#N/A	#N/A	#N/A
													#N/A	#N/A	#N/A
													#N/A	#N/A	#N/A
													#N/A	#N/A	#N/A
													#N/A	#N/A	#N/A
													#N/A	#N/A	#N/A
													#N/A	#N/A	#N/A
													#N/A	#N/A	#N/A
													#N/A	#N/A	#N/A
													#N/A	#N/A	#N/A
													#N/A	#N/A	#N/A
													#N/A	#N/A	#N/A
													#N/A	#N/A	#N/A
													#N/A	#N/A	#N/A
													#N/A	#N/A	#N/A
													#N/A	#N/A	#N/A
													#N/A	#N/A	#N/A
													#N/A	#N/A	#N/A
													#N/A	#N/A	#N/A
													#N/A	#N/A	#N/A
													#N/A	#N/A	#N/A
													#N/A	#N/A	#N/A
													#N/A	#N/A	#N/A
													#N/A	#N/A	#N/A
													#N/A	#N/A	#N/A
													#N/A	#N/A	#N/A
													#N/A	#N/A	#N/A
													#N/A	#N/A	#N/A
													#N/A	#N/A	#N/A
													#N/A	#N/A	#N/A
													#N/A	#N/A	#N/A
													#N/A	#N/A	#N/A
													#N/A	#N/A	#N/A
													#N/A	#N/A	#N/A
													#N/A	#N/A	#N/A
													#N/A	#N/A	#N/A
													#N/A	#N/A	#N/A
													#N/A	#N/A	#N/A
													#N/A	#N/A	#N/A
													#N/A	#N/A	#N/A
													#N/A	#N/A	#N/A
													#N/A	#N/A	#N/A
													#N/A	#N/A	#N/A
													#N/A	#N/A	#N/A
													#N/A	#N/A	#N/A
													#N/A	#N/A	#N/A
													#N/A	#N/A	#N/A
													#N/A	#N/A	#N/A
													#N/A	#N/A	#N/A
													#N/A	#N/A	#N/A
													#N/A	#N/A	#N/A
													#N/A	#N/A	#N/A
													#N/A	#N/A	#N/A
													#N/A	#N/A	#N/A
													#N/A	#N/A	#N/A
													#N/A	#N/A	#N/A
													#N/A	#N/A	#N/A
													#N/A	#N/A	#N/A
													#N/A	#N/A	#N/A
													#N/A	#N/A	#N/A
													#N/A	#N/A	#N/A
													#N/A	#N/A	#N/A
													#N/A	#N/A	#N/A
													#N/A	#N/A	#N/A
													#N/A	#N/A	#N/A
													#N/A	#N/A	#N/A
													#N/A	#N/A	#N/A
													#N/A	#N/A	#N/A
													#N/A	#N/A	#N/A
													#N/A	#N/A	#N/A
													#N/A	#N/A	#N/A
													#N/A	#N/A	#N/A
													#N/A	#N/A	#N/A
													#N/A	#N/A	#N/A
													#N/A	#N/A	#N/A
													#N/A	#N/A	#N/A
													#N/A	#N/A	#N/A
													#N/A	#N/A	#N/A
													#N/A	#N/A	#N/A
													#N/A	#N/A	#N/A
													#N/A	#N/A	#N/A
													#N/A	#N/A	#N/A
													#N/A	#N/A	#N/A
													#N/A	#N/A	#N/A
													#N/A	#N/A	#N/A
													#N/A	#N/A	#N/A
													#N/A	#N/A	#N/A
													#N/A	#N/A	#N/A
													#N/A	#N/A	#N/A
													#N/A	#N/A	#N/A
													#N/A	#N/A	#N/A
													#N/A	#N/A	#N/A
													#N/A	#N/A	#N/A
													#N/A	#N/A	#N/A
													#N/A	#N/A	#N/A
													#N/A	#N/A	#N/A
													#N/A	#N/A	#N/A
													#N/A	#N/A	#N/A
													#N/A	#N/A	#N/A
													#N/A	#N/A	#N/A
													#N/A	#N/A	#N/A
													#N/A	#N/A	#N/A
													#N/A	#N/A	#N/A
													#N/A	#N/A	#N/A
													#N/A	#N/A	#N/A
													#N/A	#N/A	#N/A
													#N/A	#N/A	#N/A
													#N/A	#N/A	#N/A
													#N/A	#N/A	#N/A
													#N/A	#N/A	#N/A
													#N/A	#N/A	#N/A
													#N/A	#N/A	#N/A
													#N/A	#N/A	#N/A
													#N/A	#N/A	#N/A
													#N/A	#N/A	#N/A
													#N/A	#N/A	#N/A
													#N/A	#N/A	#N/A
													#N/A	#N/A	#N/A
													#N/A	#N/A	#N/A
													#N/A	#N/A	#N/A
													#N/A	#N/A	#N/A
													#N/A	#N/A	#N/A
													#N/A	#N/A	#N/A
													#N/A	#N/A	#N/A
													#N/A	#N/A	#N/A
													#N/A	#N/A	#N/A
													#N/A	#N/A	#N/A
													#N/A	#N/A	#N/A
													#N/A	#N/A	#N/A
													#N/A	#N/A	#N/A
													#N/A	#N/A	#N/A
													#N/A	#N/A	#N/A
													#N/A	#N/A	#N/A
													#N/A	#N/A	#N/A
													#N/A	#N/A	#N/A
													#N/A	#N/A	#N/A
													#N/A	#N/A	#N/A
													#N/A	#N/A	#N/A
													#N/A	#N/A	#N/A
													#N/A	#N/A	#N/A
													#N/A	#N/A	#N/A
													#N/A	#N/A	#N/A
													#N/A	#N/A	#N/A
													#N/A	#N/A	#N/A
													#N/A	#N/A	#N/A
													#N/A	#N/A	#N/A
													#N/A	#N/A	#N/A
													#N/A	#N/A	#N/A
													#N/A	#N/A	#N/A
													#N/A	#N/A	#N/A
													#N/A	#N/A	#N/A
													#N/A	#N/A	#N/A
													#N/A	#N/A	#N/A
													#N/A	#N/A	#N/A
													#N/A	#N/A	#N/A
													#N/A	#N/A	#N/A
													#N/A	#N/A	#N/A
													#N/A	#N/A	#N/A
													#N/A	#N/A	#N/A
													#N/A	#N/A	#N/A
													#N/A	#N/A	#N/A
													#N/A	#N/A	#N/A
													#N/A	#N/A	#N/A
													#N/A	#N/A	#N/A
													#N/A	#N/A	#N/A
													#N/A	#N/A	#N/A
													#N/A	#N/A	#N/A
													#N/A	#N/A	#N/A
													#N/A	#N/A	#N/A
													#N/A	#N/A	#N/A
													#N/A	#N/A	#N/A
													#N/A	#N/A	#N/A
													#N/A	#N/A	#N/A
													#N/A	#N/A	#N/A
													#N/A	#N/A	#N/A
													#N/A	#N/A	#N/A
													#N/A	#N/A	#N/A
													#N/A	#N/A	#N/A
													#N/A	#N/A	#N/A
													#N/A	#N/A	#N/A
													#N/A	#N/A	#N/A
													#N/A	#N/A	#N/A
													#N/A	#N/A	#N/A
													#N/A	#N/A	#N/A
													#N/A	#N/A	#N/A
													#N/A	#N/A	#N/A
													#N/A	#N/A	#N/A
													#N/A	#N/A	#N/A
													#N/A	#N/A	#N/A
													#N/A	#N/A	#N/A
													#N/A	#N/A	#N/A
													#N/A	#N/A	#N/A
													#N/A	#N/A	#N/A
													#N/A	#N/A	#N/A
													#N/A	#N/A	#N/A
													#N/A	#N/A	#N/A
													#N/A	#N/A	#N/A
													#N/A	#N/A	#N/A
													#N/A	#N/A	#N/A
													#N/A	#N/A	#N/A
													#N/A	#N/A	#N/A
													#N/A	#N/A	#N/A
													#N/A	#N/A	#N/A
													#N/A	#N/A	#N/A
													#N/A	#N/A	#N/A
													#N/A	#N/A	#N/A
													#N/A	#N/A	#N/A
													#N/A	#N/A	#N/A
													#N/A	#N/A	#N/A
													#N/A	#N/A	#N/A
													#N/A	#N/A	#N/A
													#N/A	#N/A	#N/A
													#N/A	#N/A	#N/A
													#N/A	#N/A	#N/A
													#N/A	#N/A	#N/A
													#N/A	#N/A	#N/A
													#N/A	#N/A	#N/A
													#N/A	#N/A	#N/A
													#N/A	#N/A	#N/A
													#N/A	#N/A	#N/A
													#N/A	#N/A	#N/A
													#N/A	#N/A	#N/A
													#N/A	#N/A	#N/A
													#N/A	#N/A	#N/A
													#N/A	#N/A	#N/A
													#N/A	#N/A	#N/A
													#N/A	#N/A	#N/A
													#N/A	#N/A	#N/A
													#N/A	#N/A	#N/A
													#N/A	#N/A	#N/A
													#N/A	#N/A	#N/A
													#N/A	#N/A	#N/A
													#N/A	#N/A	#N/A
													#N/A	#N/A	#N/A
													#N/A	#N/A	#N/A
													#N/A	#N/A	#N/A
													#N/A	#N/A	#N/A
													#N/A	#N/A	#N/A
													#N/A	#N/A	#N/A
													#N/A	#N/A	#N/A
													#N/A	#N/A	#N/A
													#N/A	#N/A	#N/A
													#N/A	#N/A	#N/A
													#N/A	#N/A	#N/A
													#N/A	#N/A	#N/A
													#N/A	#N/A	#N/A
													#N/A	#N/A	#N/A
													#N/A	#N/A	#N/A
													#N/A	#N/A	#N/A
													#N/A	#N/A	#N/A
													#N/A	#N/A	#N/A
													#N/A	#N/A	#N/A
													#N/A	#N/A	#N/A
													#N/A	#N/A	#N/A
													#N/A	#N/A	#N/A
													#N/A	#N/A	#N/A
													#N/A	#N/A	#N/A
													#N/A	#N/A	#N/A
													#N/A	#N/A	#N/A
													#N/A	#N/A	#N/A
													#N/A	#N/A	#N/A
													#N/A	#N/A	#N/A
													#N/A	#N/A	#N/A
													#N/A	#N/A	#N/A
													#N/A	#N/A	#N/A
													#N/A	#N/A	#N/A
													#N/A	#N/A	#N/A
													#N/A	#N/A	#N/A
													#N/A	#N/A	#N/A
													#N/A	#N/A	#N/A
													#N/A	#N/A	#N/A
													#N/A	#N/A	#N/A
													#N/A	#N/A	#N/A
													#N/A	#N/A	#N/A
													#N/A	#N/A	#N/A
													#N/A	#N/A	#N/A
													#N/A	#N/A	#N/A
													#N/A	#N/A	#N/A
													#N/A	#N/A	#N/A
													#N/A	#N/A	#N/A
													#N/A	#N/A	#N/A
													#N/A	#N/A	#N/A
[truncated: 1,046,576+ more rows]

## Sheet: sheet1
	0	1	2	3	4	5	6	7	8	9	10	11	12	13	14	15
0	1	0.785233	0.594997	0.463106	0.46255	0.367161	0.291444	0.236403	0.191757	0.156665	0.125329	0.120499	0.0966783	0.0729367	0.0550255	0.044226
1		0.168642	0.318022	0.379418	0.379518	0.396642	0.390562	0.371843	0.346264	0.317989	0.285721	0.279539	0.2481	0.210915	0.177031	0.153086
2			0.04	0.102295	0.102627	0.159729	0.208586	0.242953	0.267295	0.281746	0.288996	0.288869	0.287025	0.277466	0.261123	0.244619
3				0.0090565	0.00916844	0.0284419	0.0555165	0.0844247	0.114364	0.14235	0.170232	0.17481	0.197357	0.219377	0.233642	0.239036
4					1.08732e-05	0.00189938	0.0073731	0.0164653	0.0292998	0.0448665	0.0643651	0.0684456	0.0894717	0.115965	0.14136	0.159472
5						1.08732e-05	0.000393479	0.00171162	0.00449795	0.00903668	0.0162033	0.0180596	0.02802	0.0431109	0.0610019	0.0767734
6							1.08732e-05	7.4686e-05	0.000383832	0.00113671	0.00271686	0.00323667	0.00616689	0.0115334	0.019288	0.0274749
7								1.08732e-05	1.41758e-05	8.18227e-05	0.000292821	0.000386251	0.000949726	0.00223092	0.00451536	0.00741468
8									1.08732e-05	2.60763e-06	1.84521e-05	2.90273e-05	9.96438e-05	0.000308401	0.000780519	0.00151353
9										1.08732e-05	5.2399e-07	1.215e-06	6.71297e-06	2.95342e-05	9.80162e-05	0.000231966
10											1.08732e-05	2.07768e-08	2.56853e-07	1.8423e-06	8.64268e-06	2.61834e-05
11												1.08732e-05	4.12586e-09	6.61888e-08	5.02353e-07	2.1e-06
12													1.08732e-05	1.01667e-09	1.70212e-08	1.12274e-07
13														1.08732e-05	2.50518e-10	3.54198e-09
14															1.08732e-05	4.93904e-11
15																1.08732e-05
																sheet
