# Supplementary material for: Probabilistic En Route Sector Traffic Demand Prediction Based upon Statistical Analysis of Error Distribution Characteristics
Source: Hindawi journal article supplement (doi:10.1155/2018/8184513), 2018-08-13
Supplement: f1 [file 8184513.f1.rar › Fig.8 AR05-0700-0714.xlsx]

## Sheet: 0700-0714
CALLSIGN	PASSSECTOR	EINSECTORTIME	EOUTSECTORTIME	OPINSECTORTIME	OPOUTSECTORTIME	ATD	FlyTime	Predicted Time Error ∆ti(in)	Predicted Time Error ∆ti(out)	probability distribution(in)	probability distribution(out)	The probability of the aircraft in AR05	0	0	1
CHH7784	ZGGGAR05	2014-05-01 07:24:00	2014-05-01 07:35:23	2014-05-01 07:08:40	2014-05-01 07:20:03	2014-05-01 07:04:00	1900-01-01 00:04:40	15.3333	15.3333	0.689035	0.683261	0.218244	1	0	0.781756
AIC314	ZGGGAR05	2014-05-01 07:18:00	2014-05-01 07:34:00	2014-05-01 07:11:29	2014-05-01 07:27:29	2014-05-01 03:24:00	1900-01-01 03:47:29	6.51667	6.51667	0.505565	0.499278	0.253147	1	1	0.170614
CHH7784	ZGGGAR05	2014-05-02 07:27:00	2014-05-02 07:38:23	2014-05-02 07:08:14	2014-05-02 07:19:37	2014-05-02 07:07:00	1900-01-01 00:01:14	18.7667	18.7667	0.751656	0.746408	0.190614	2	0	0.583856
CES5764	ZGGGAR05	2014-05-02 07:00:00	2014-05-02 07:05:53	2014-05-02 07:09:32	2014-05-02 07:15:25	2014-05-02 06:58:00	1900-01-01 00:11:32	-9.53333	-9.53333	0.195354	0.191292	0.157985	2	2	0.0431904
KNA8286	ZGGGAR05	2014-05-03 07:14:19	2014-05-03 07:22:08	2014-05-03 07:12:46	2014-05-03 07:20:43	2014-05-03 06:58:00	1900-01-01 00:14:46	1.55	1.41667	0.398984	0.390244	0.243283	2	1	0.325323
ETD933	ZGGGAR05	2014-05-05 08:05:00	2014-05-05 08:21:00	2014-05-05 07:01:04	2014-05-05 07:17:04	2014-05-05 00:55:00	1900-01-01 06:06:04	63.9333	63.9333	0.999139	0.999081	0.000918082	3	0	0.472565
CES5754	ZGGGAR05	2014-05-05 07:04:19	2014-05-05 07:12:08	2014-05-05 07:01:38	2014-05-05 07:08:57	2014-05-05 06:48:00	1900-01-01 00:13:38	2.68333	3.18333	0.422938	0.427488	0.242137	3	3	0.0082327
CSN3920	ZGGGAR05	2014-05-05 07:26:00	2014-05-05 07:37:17	2014-05-05 07:04:32	2014-05-05 07:15:49	2014-05-05 07:06:00	1899-12-31 23:58:32.000	21.4667	21.4667	0.795725	0.790975	0.166327	3	1	0.374603
CHH7784	ZGGGAR05	2014-05-05 07:30:00	2014-05-05 07:41:23	2014-05-05 07:11:34	2014-05-05 07:22:57	2014-05-05 07:10:00	1900-01-01 00:01:34	18.4333	18.4333	0.745884	0.740579	0.193498	3	2	0.0969688
KNA8286	ZGGGAR05	2014-05-06 07:10:19	2014-05-06 07:18:08	2014-05-06 07:06:45	2014-05-06 07:13:38	2014-05-06 06:54:00	1900-01-01 00:12:45	3.56667	4.5	0.441812	0.455692	0.240482	4	0	0.397907
QTR8940	ZGGGAR05	2014-05-07 06:58:00	2014-05-07 07:11:00	2014-05-07 07:00:10	2014-05-07 07:13:10	2014-05-07 06:11:00	1900-01-01 00:49:10	-2.16667	-2.16667	0.323487	0.318029	0.220609	4	4	0.00130064
CES5754	ZGGGAR05	2014-05-07 07:10:19	2014-05-07 07:18:08	2014-05-07 07:07:03	2014-05-07 07:14:04	2014-05-07 06:54:00	1900-01-01 00:13:03	3.26667	4.06667	0.435385	0.446378	0.241038	4	1	0.390079
CHH7784	ZGGGAR05	2014-05-07 07:30:00	2014-05-07 07:41:23	2014-05-07 07:11:53	2014-05-07 07:23:16	2014-05-07 07:10:00	1900-01-01 00:01:53	18.1167	18.1167	0.740337	0.734979	0.196205	4	2	0.140831
GAP2659	ZGGGAR05	2014-05-08 07:38:00	2014-05-08 07:49:00	2014-05-08 07:01:02	2014-05-08 07:12:02	2014-05-08 00:28:00	1900-01-01 06:33:02	36.9667	36.9667	0.952426	0.95066	0.0469929	4	3	0.0222516
CSN3920	ZGGGAR05	2014-05-08 07:24:00	2014-05-08 07:35:22	2014-05-08 07:01:42	2014-05-08 07:13:04	2014-05-08 07:04:00	1899-12-31 23:57:42.000	22.3	22.3	0.808325	0.803738	0.158643	5	0	0.301103
EPA6228	ZGGGAR05	2014-05-08 07:15:55	2014-05-08 07:17:55	2014-05-08 07:07:51	2014-05-08 07:10:55	2014-05-08 06:18:00	1900-01-01 00:49:51	8.06667	7	0.539109	0.509745	0.264301	5	5	0.000316423
CSZ9910	ZGGGAR05	2014-05-08 07:24:06	2014-05-08 07:33:09	2014-05-08 07:13:17	2014-05-08 07:18:57	2014-05-08 06:36:00	1900-01-01 00:37:17	10.8167	14.2	0.597795	0.661042	0.202627	5	1	0.391984
AIC310	ZGGGAR05	2014-05-09 06:57:00	2014-05-09 07:13:00	2014-05-09 07:01:34	2014-05-09 07:17:34	2014-05-09 03:03:00	1900-01-01 03:58:34	-4.56667	-4.56667	0.27813	0.273085	0.202177	5	2	0.201469
CSN3920	ZGGGAR05	2014-05-09 07:25:00	2014-05-09 07:36:22	2014-05-09 07:05:19	2014-05-09 07:16:41	2014-05-09 07:05:00	1900-01-01 00:00:19	19.6833	19.6833	0.767161	0.762075	0.182527	5	3	0.0510999
CSN3782	ZGGGAR05	2014-05-10 07:02:59	2014-05-10 07:21:35	2014-05-10 07:03:35	2014-05-10 07:22:11	2014-05-10 06:26:00	1900-01-01 00:37:35	-0.6	-0.6	0.354639	0.348947	0.230889	5	4	0.00639765
CSS6879	ZGGGAR05	2014-05-10 07:21:00	2014-05-10 07:32:23	2014-05-10 07:05:34	2014-05-10 07:16:57	2014-05-10 07:01:00	1900-01-01 00:04:34	15.4333	15.4333	0.690952	0.685191	0.217518	6	0	0.300827
KNA8286	ZGGGAR05	2014-05-10 07:15:19	2014-05-10 07:23:08	2014-05-10 07:11:18	2014-05-10 07:17:55	2014-05-10 06:59:00	1900-01-01 00:12:18	4.01667	5.21667	0.451481	0.471148	0.238767	6	6	2.90502e-07
CPA696	ZGGGAR05	2014-05-10 06:30:00	2014-05-10 06:46:00	2014-05-10 07:11:49	2014-05-10 07:27:49	2014-05-10 02:00:00	1900-01-01 05:11:49	-41.8167	-41.8167	0.00448937	0.00432267	0.00446997	6	1	0.3919
CSN3920	ZGGGAR05	2014-05-11 07:19:00	2014-05-11 07:30:22	2014-05-11 07:00:45	2014-05-11 07:12:07	2014-05-11 06:59:00	1900-01-01 00:01:45	18.25	18.25	0.74268	0.737344	0.195069	6	2	0.201643
CES5754	ZGGGAR05	2014-05-12 07:05:19	2014-05-12 07:13:08	2014-05-12 07:00:36	2014-05-12 07:06:51	2014-05-12 06:49:00	1900-01-01 00:11:36	4.71667	6.28333	0.466577	0.494225	0.235983	6	3	0.0512379
BOX614	ZGGGAR05	2014-05-12 07:07:00	2014-05-12 07:23:00	2014-05-12 07:05:06	2014-05-12 07:21:06	2014-05-12 02:44:00	1900-01-01 04:21:06	1.9	1.9	0.406345	0.400349	0.243665	6	4	0.00643869
CSZ9910	ZGGGAR05	2014-05-12 07:23:06	2014-05-12 07:32:09	2014-05-12 07:13:44	2014-05-12 07:19:54	2014-05-12 06:35:00	1900-01-01 00:38:44	9.36667	12.25	0.567039	0.621509	0.214619	6	5	0.000322006
CES5764	ZGGGAR05	2014-05-12 07:09:00	2014-05-12 07:14:53	2014-05-12 07:13:52	2014-05-12 07:19:45	2014-05-12 07:07:00	1900-01-01 00:06:52	-4.86667	-4.86667	0.272686	0.267696	0.199689	7	0	0.227986
CES5764	ZGGGAR05	2014-05-13 07:03:00	2014-05-13 07:08:53	2014-05-13 07:09:28	2014-05-13 07:15:21	2014-05-13 07:01:00	1900-01-01 00:08:28	-6.46667	-6.46667	0.244573	0.239889	0.185903	7	7	7.03412e-08
CHH7784	ZGGGAR05	2014-05-15 07:29:00	2014-05-15 07:40:23	2014-05-15 07:10:58	2014-05-15 07:22:21	2014-05-15 07:09:00	1900-01-01 00:01:58	18.0333	18.0333	0.738867	0.733495	0.196912	7	1	0.369848
CES5764	ZGGGAR05	2014-05-16 06:59:00	2014-05-16 07:04:53	2014-05-16 07:04:07	2014-05-16 07:10:00	2014-05-16 06:57:00	1900-01-01 00:07:07	-5.11667	-5.11667	0.26819	0.263246	0.19759	7	2	0.247712
CSN3920	ZGGGAR05	2014-05-16 07:29:00	2014-05-16 07:40:22	2014-05-16 07:08:45	2014-05-16 07:20:07	2014-05-16 07:09:00	1899-12-31 23:59:45.000	20.25	20.25	0.77647	0.771488	0.177433	7	3	0.0876566
CHH7784	ZGGGAR05	2014-05-16 07:27:00	2014-05-16 07:38:23	2014-05-16 07:11:42	2014-05-16 07:23:05	2014-05-16 07:07:00	1900-01-01 00:04:42	15.3	15.3	0.688394	0.682616	0.218485	7	4	0.0172862
CSZ9910	ZGGGAR05	2014-05-16 07:21:06	2014-05-16 07:30:09	2014-05-16 07:11:44	2014-05-16 07:17:54	2014-05-16 06:33:00	1900-01-01 00:38:44	9.36667	12.25	0.567039	0.621509	0.214619	7	5	0.00180308
CSS6879	ZGGGAR05	2014-05-17 07:21:00	2014-05-17 07:32:27	2014-05-17 07:08:33	2014-05-17 07:20:00	2014-05-17 07:01:00	1900-01-01 00:07:33	12.45	12.45	0.63172	0.625631	0.236496	7	6	7.81896e-05
CHH7784	ZGGGAR05	2014-05-17 07:34:00	2014-05-17 07:45:23	2014-05-17 07:10:09	2014-05-17 07:21:32	2014-05-17 07:14:00	1899-12-31 23:56:09.000	23.85	23.85	0.830458	0.826185	0.144346	8	0	0.190065
CHH7784	ZGGGAR05	2014-05-18 07:31:00	2014-05-18 07:42:23	2014-05-18 07:10:27	2014-05-18 07:21:50	2014-05-18 07:11:00	1899-12-31 23:59:27.000	20.55	20.55	0.781312	0.776386	0.174712	8	8	1.16996e-08
CES5754	ZGGGAR05	2014-05-19 07:11:19	2014-05-19 07:19:08	2014-05-19 07:06:45	2014-05-19 07:13:05	2014-05-19 06:55:00	1900-01-01 00:11:45	4.56667	6.05	0.463338	0.489172	0.236686	8	1	0.346253
CSN3920	ZGGGAR05	2014-05-19 07:24:00	2014-05-19 07:35:17	2014-05-19 07:07:43	2014-05-19 07:19:00	2014-05-19 07:04:00	1900-01-01 00:03:43	16.2833	16.2833	0.707036	0.701393	0.211126	8	2	0.268026
CPA696	ZGGGAR05	2014-05-21 05:45:00	2014-05-21 06:01:00	2014-05-21 07:02:20	2014-05-21 07:18:20	2014-05-21 01:15:00	1900-01-01 05:47:20	-77.3333	-77.3333	2.77144e-06	2.63268e-06	2.77143e-06	8	3	0.114278
CES5764	ZGGGAR05	2014-05-21 07:03:00	2014-05-21 07:08:53	2014-05-21 07:12:40	2014-05-21 07:18:33	2014-05-21 07:01:00	1900-01-01 00:11:40	-9.66667	-9.66667	0.19336	0.189326	0.156752	8	4	0.0289907
PAL657	ZGGGAR05	2014-05-22 06:54:00	2014-05-22 07:05:28	2014-05-22 07:03:47	2014-05-22 07:15:15	2014-05-22 00:26:00	1900-01-01 06:37:47	-9.78333	-9.78333	0.191626	0.187616	0.155674	8	5	0.00437834
PAL657	ZGGGAR05	2014-05-22 06:54:00	2014-05-22 07:05:28	2014-05-22 07:03:47	2014-05-22 07:15:15	2014-05-22 00:26:00	1900-01-01 06:37:47	-9.78333	-9.78333	0.191626	0.187616	0.155674	8	6	0.000365085
CHH7784	ZGGGAR05	2014-05-22 07:24:00	2014-05-22 07:35:23	2014-05-22 07:06:02	2014-05-22 07:17:25	2014-05-22 07:04:00	1900-01-01 00:02:02	17.9667	17.9667	0.737687	0.732304	0.197476	8	7	1.30637e-05
CES5764	ZGGGAR05	2014-05-22 07:01:00	2014-05-22 07:06:53	2014-05-22 07:08:43	2014-05-22 07:14:36	2014-05-22 06:59:00	1900-01-01 00:09:43	-7.71667	-7.71667	0.223746	0.219312	0.174676	9	0	0.153288
CES5764	ZGGGAR05	2014-05-23 07:03:00	2014-05-23 07:08:53	2014-05-23 07:05:01	2014-05-23 07:10:54	2014-05-23 07:01:00	1900-01-01 00:04:01	-2.01667	-2.01667	0.326421	0.320939	0.221659	9	9	2.26385e-09
CES5754	ZGGGAR05	2014-05-23 07:10:19	2014-05-23 07:18:08	2014-05-23 07:06:44	2014-05-23 07:13:35	2014-05-23 06:54:00	1900-01-01 00:12:44	3.58333	4.55	0.442169	0.456769	0.2402	9	1	0.316031
ETD933	ZGGGAR05	2014-05-24 07:33:00	2014-05-24 07:49:00	2014-05-24 07:00:34	2014-05-24 07:16:34	2014-05-24 00:23:00	1900-01-01 06:37:34	32.4333	32.4333	0.922554	0.920015	0.0737901	9	2	0.283163
GAP2659	ZGGGAR05	2014-05-24 07:35:00	2014-05-24 07:46:00	2014-05-24 07:10:35	2014-05-24 07:21:35	2014-05-24 00:25:00	1900-01-01 06:45:35	24.4167	24.4167	0.838124	0.833967	0.139156	9	3	0.144028
CSN3920	ZGGGAR05	2014-05-25 07:19:00	2014-05-25 07:30:22	2014-05-25 07:04:43	2014-05-25 07:16:05	2014-05-25 06:59:00	1900-01-01 00:05:43	14.2833	14.2833	0.6686	0.662696	0.225521	9	4	0.0454936
CES5764	ZGGGAR05	2014-05-25 07:06:00	2014-05-25 07:11:53	2014-05-25 07:12:38	2014-05-25 07:18:31	2014-05-25 07:04:00	1900-01-01 00:08:38	-6.63333	-6.63333	0.241737	0.237086	0.184425	9	5	0.00914078
AIC310	ZGGGAR05	2014-05-26 06:38:00	2014-05-26 06:54:00	2014-05-26 07:00:31	2014-05-26 07:16:31	2014-05-26 02:44:00	1900-01-01 04:16:31	-22.5167	-22.5167	0.0589147	0.0572834	0.0555399	9	6	0.00114164
CES5754	ZGGGAR05	2014-05-26 07:05:19	2014-05-26 07:13:08	2014-05-26 07:01:37	2014-05-26 07:08:24	2014-05-26 06:49:00	1900-01-01 00:12:37	3.7	4.73333	0.444674	0.460718	0.239804	9	7	8.1179e-05
CSN3920	ZGGGAR05	2014-05-26 07:24:00	2014-05-26 07:35:22	2014-05-26 07:04:51	2014-05-26 07:16:13	2014-05-26 07:04:00	1900-01-01 00:00:51	19.15	19.15	0.758206	0.753025	0.187258	9	8	2.53723e-06
QTR8940	ZGGGAR05	2014-05-28 06:53:00	2014-05-28 07:06:00	2014-05-28 07:00:05	2014-05-28 07:13:05	2014-05-28 06:06:00	1900-01-01 00:54:05	-7.08333	-7.08333	0.23417	0.229608	0.180403	10	0	0.116425
CES5764	ZGGGAR05	2014-05-28 07:01:00	2014-05-28 07:06:53	2014-05-28 07:06:01	2014-05-28 07:11:54	2014-05-28 06:59:00	1900-01-01 00:07:01	-5.01667	-5.01667	0.269984	0.265021	0.198432	10	10	5.44415e-10
CHH7784	ZGGGAR05	2014-05-28 07:26:00	2014-05-28 07:37:23	2014-05-28 07:06:53	2014-05-28 07:18:16	2014-05-28 07:06:00	1900-01-01 00:00:53	19.1167	19.1167	0.75764	0.752453	0.187552	10	1	0.276894
CES5764	ZGGGAR05	2014-05-29 06:58:00	2014-05-29 07:03:53	2014-05-29 07:02:41	2014-05-29 07:08:34	2014-05-29 06:56:00	1900-01-01 00:06:41	-4.68333	-4.68333	0.276007	0.270982	0.201214	10	2	0.291067
CES5754	ZGGGAR05	2014-05-29 07:09:19	2014-05-29 07:17:08	2014-05-29 07:04:31	2014-05-29 07:10:42	2014-05-29 06:53:00	1900-01-01 00:11:31	4.8	6.43333	0.468378	0.497473	0.235372	10	3	0.177487
CHH7784	ZGGGAR05	2014-05-29 07:29:00	2014-05-29 07:40:23	2014-05-29 07:11:29	2014-05-29 07:22:52	2014-05-29 07:09:00	1900-01-01 00:02:29	17.5167	17.5167	0.729657	0.724201	0.201239	10	4	0.0691893
EPA6228	ZGGGAR05	2014-05-29 07:20:55	2014-05-29 07:22:55	2014-05-29 07:13:46	2014-05-29 07:16:56	2014-05-29 06:23:00	1900-01-01 00:50:46	7.15	5.98333	0.519289	0.487729	0.266017	10	5	0.017883
CES5764	ZGGGAR05	2014-05-30 07:05:00	2014-05-30 07:10:53	2014-05-30 07:08:13	2014-05-30 07:14:06	2014-05-30 07:03:00	1900-01-01 00:05:13	-3.21667	-3.21667	0.303264	0.297979	0.212897	10	6	0.00306529
KNA8286	ZGGGAR05	2014-05-30 07:18:19	2014-05-30 07:26:08	2014-05-30 07:13:31	2014-05-30 07:19:44	2014-05-30 07:02:00	1900-01-01 00:11:31	4.8	6.4	0.468378	0.496751	0.235711	10	7	0.000336201
								18.3956	18.4188				10	8	2.14491e-05
													10	9	6.11876e-07
													11	0	0.0907408
													11	11	1.20103e-10
													11	1	0.241493
													11	2	0.28794
													11	3	0.202544
													11	4	0.0930808
													11	5	0.0292016
													11	6	0.00633419
													11	7	0.000938261
													11	8	9.0886e-05
													11	9	5.20875e-06
													11	10	1.35409e-07
													12	0	0.0688688
													12	12	2.89493e-11
													12	1	0.205156
													12	2	0.276745
													12	3	0.223128
													12	4	0.119466
													12	5	0.0445989
													12	6	0.0118461
													12	7	0.00223889
													12	8	0.000295136
													12	9	2.58603e-05
													12	10	1.35828e-06
													12	11	3.273e-08
													13	0	0.0553564
													13	13	5.68001e-12
													13	1	0.178416
													13	2	0.262699
													13	3	0.233648
													13	4	0.139805
													13	5	0.0592882
													13	6	0.0182724
													13	7	0.00412388
													13	8	0.00067651
													13	9	7.86935e-05
													13	10	6.1657e-06
													13	11	2.9281e-07
													13	12	6.44507e-09
													14	0	0.052755
													14	14	2.6692e-13
													14	1	0.172633
													14	2	0.258738
													14	3	0.235013
													14	4	0.144215
													14	5	0.0630719
													14	6	0.0201998
													14	7	0.00478875
													14	8	0.000838512
													14	9	0.000106787
													14	10	9.57399e-06
													14	11	5.68794e-07
													14	12	1.99022e-08
													14	13	3.08285e-10
													15	0	0.0443858
													15	15	4.23451e-14
													15	1	0.153615
													15	2	0.245078
													15	3	0.238777
													15	4	0.158619
													15	5	0.0759446
													15	6	0.0270012
													15	7	0.00723362
													15	8	0.00146519
													15	9	0.00022287
													15	10	2.49961e-05
													15	11	1.99741e-06
													15	12	1.0698e-07
													15	13	3.41673e-09
													15	14	4.9132e-11
													16	0	0.0326546
													16	16	1.11918e-14
													16	1	0.124746
													16	2	0.220904
													16	3	0.240442
													16	4	0.179805
													16	5	0.0977956
													16	6	0.039937
													16	7	0.0124582
													16	8	0.00298979
													16	9	0.000551216
													16	10	7.72943e-05
													16	11	8.07599e-06
													16	12	6.06622e-07
													16	13	3.07886e-08
													16	14	9.39189e-10
													16	15	1.30168e-11
													17	0	0.0260379
													17	17	2.26777e-15
													17	1	0.106086
													17	2	0.20142
													17	3	0.236483
													17	4	0.192092
													17	5	0.114413
													17	6	0.0516607
													17	7	0.0180262
													17	8	0.00490835
													17	9	0.00104534
													17	10	0.000173324
													17	11	2.21015e-05
													17	12	2.12012e-06
													17	13	1.47468e-07
													17	14	6.9875e-09
													17	15	2.00685e-10
													17	16	2.64648e-12
													18	0	0.0207736
													18	18	4.58491e-16
													18	1	0.0899018
													18	2	0.182146
													18	3	0.229394
													18	4	0.201067
													18	5	0.130118
													18	6	0.0643478
													18	7	0.0248263
													18	8	0.00756047
													18	9	0.00182635
													18	10	0.000349625
													18	11	5.26752e-05
													18	12	6.1599e-06
													18	13	5.46293e-07
													18	14	3.53895e-08
													18	15	1.57282e-09
													18	16	4.26852e-11
													18	17	5.36866e-13
													19	0	0.0169819
													19	19	8.3687e-17
													19	1	0.077284
													19	2	0.165309
													19	3	0.22077
													19	4	0.206237
													19	5	0.143068
													19	6	0.0763525
													19	7	0.03204
													19	8	0.0107119
													19	9	0.00287298
													19	10	0.000619167
													19	11	0.000106877
													19	12	1.46502e-05
													19	13	1.57093e-06
													19	14	1.28643e-07
													19	15	7.74526e-09
													19	16	3.21976e-10
													19	17	8.23007e-12
													19	18	9.83673e-14
													20	0	0.013061
													20	20	1.93224e-17
													20	1	0.0633609
													20	2	0.144985
													20	3	0.207965
													20	4	0.209593
													20	5	0.157653
													20	6	0.0917563
													20	7	0.0422713
													20	8	0.0156364
													20	9	0.00468291
													20	10	0.00113955
													20	11	0.000225159
													20	12	3.59442e-05
													20	13	4.59078e-06
													20	14	4.6165e-07
													20	15	3.56592e-08
													20	16	2.03593e-09
													20	17	8.06706e-11
													20	18	1.97589e-12
													20	19	2.27763e-14
													21	0	0.01022
													21	21	4.20296e-18
													21	1	0.0524198
													21	2	0.12723
													21	3	0.194265
													21	4	0.209239
													21	5	0.168951
													21	6	0.10609
													21	7	0.0530352
													21	8	0.0214299
													21	9	0.00706548
													21	10	0.00191029
													21	11	0.000424054
													21	12	7.71017e-05
													21	13	1.14107e-05
													21	14	1.35981e-06
													21	15	1.2832e-07
													21	16	9.34958e-09
													21	17	5.05974e-10
													21	18	1.90934e-11
													21	19	4.47612e-13
													21	20	4.96936e-15
													22	0	0.00777978
													22	22	1.00353e-18
													22	1	0.0423439
													22	2	0.109368
													22	3	0.17826
													22	4	0.205663
													22	5	0.17857
													22	6	0.121099
													22	7	0.0657029
													22	8	0.0289762
													22	9	0.0104952
													22	10	0.00314118
													22	11	0.000778918
													22	12	0.000159942
													22	13	2.70955e-05
													22	14	3.75963e-06
													22	15	4.22358e-07
													22	16	3.77557e-08
													22	17	2.61753e-09
													22	18	1.35344e-10
													22	19	4.8996e-12
													22	20	1.10658e-13
													22	21	1.18972e-15
													23	0	0.007745
													23	23	4.48573e-21
													23	1	0.0421894
													23	2	0.109068
													23	3	0.177952
													23	4	0.205541
													23	5	0.178691
													23	6	0.121356
													23	7	0.0659505
													23	8	0.0291404
													23	9	0.0105778
													23	10	0.00317405
													23	11	0.000789478
													23	12	0.000162709
													23	13	2.76894e-05
													23	14	3.86394e-06
													23	15	4.37276e-07
													23	16	3.94749e-08
													23	17	2.7746e-09
													23	18	1.4644e-10
													23	19	5.48268e-12
													23	20	1.32064e-13
													23	21	1.67904e-15
													23	22	6.31704e-18
													24	0	0.00623419
													24	24	8.75028e-22
													24	1	0.0354703
													24	2	0.0960223
													24	3	0.164515
													24	4	0.200159
													24	5	0.183929
													24	6	0.13254
													24	7	0.0767584
													24	8	0.0363209
													24	9	0.0141988
													24	10	0.0046183
													24	11	0.00125463
													24	12	0.000284973
													24	13	5.40276e-05
													24	14	8.51155e-06
													24	15	1.10571e-06
													24	16	1.17074e-07
													24	17	9.93369e-09
													24	18	6.59113e-10
													24	19	3.2979e-11
													24	20	1.17581e-12
													24	21	2.71132e-14
													24	22	3.32613e-16
													24	23	1.23587e-18
													25	0	0.00476303
													25	25	2.06492e-22
													25	1	0.0285711
													25	2	0.081733
													25	3	0.148352
													25	4	0.191748
													25	5	0.187759
													25	6	0.144667
													25	7	0.089922
													25	8	0.0458635
													25	9	0.0194193
													25	10	0.00687914
													25	11	0.0020484
													25	12	0.000513796
													25	13	0.000108527
													25	14	1.92526e-05
													25	15	2.85336e-06
													25	16	3.50376e-07
													25	17	3.52169e-08
													25	18	2.84776e-09
													25	19	1.80736e-10
													25	20	8.68084e-12
													25	21	2.98185e-13
													25	22	6.65238e-15
													25	23	7.94354e-17
													25	24	2.92313e-19
													26	0	0.00360244
													26	26	5.03149e-23
													26	1	0.0227699
													26	2	0.0687793
													26	3	0.132119
													26	4	0.181174
													26	5	0.188731
													26	6	0.155167
													26	7	0.103261
													26	8	0.056599
													26	9	0.0258628
													26	10	0.00993473
													26	11	0.00322549
													26	12	0.000887727
													26	13	0.000207277
													26	14	4.10056e-05
													26	15	6.84928e-06
													26	16	9.60267e-07
													26	17	1.1201e-07
													26	18	1.0735e-08
													26	19	8.30597e-10
													26	20	5.06047e-11
													26	21	2.34075e-12
													26	22	7.76888e-14
													26	23	1.68103e-15
													26	24	1.95767e-17
													26	25	7.13828e-20
													27	0	0.00282929
													27	27	1.07985e-23
													27	1	0.0186562
													27	2	0.0589048
													27	3	0.118525
													27	4	0.170645
													27	5	0.187109
													27	6	0.16237
													27	7	0.114401
													27	8	0.0666137
													27	9	0.0324594
													27	10	0.0133532
													27	11	0.00466542
													27	12	0.00138945
													27	13	0.000353314
													27	14	7.66906e-05
													27	15	1.41799e-05
													27	16	2.22416e-06
													27	17	2.94062e-07
													27	18	3.24706e-08
													27	19	2.95627e-09
													27	20	2.18006e-10
													27	21	1.26991e-11
													27	22	5.63384e-13
													27	23	1.79938e-14
													27	24	3.76157e-16
													27	25	4.2576e-18
													27	26	1.53596e-20
													28	0	0.00226431
													28	28	2.15635e-24
													28	1	0.0154957
													28	2	0.0508676
													28	3	0.10662
													28	4	0.160238
													28	5	0.183821
													28	6	0.16731
													28	7	0.12398
													28	8	0.0761564
													28	9	0.0392796
													28	10	0.0171685
													28	11	0.00640027
													28	12	0.00204363
													28	13	0.00056022
													28	14	0.000131929
													28	15	2.66626e-05
													28	16	4.61159e-06
													28	17	6.79482e-07
													28	18	8.47076e-08
													28	19	8.84996e-09
													28	20	7.64807e-10
													28	21	5.36966e-11
													28	22	2.98676e-12
													28	23	1.26902e-13
													28	24	3.8942e-15
													28	25	7.85218e-17
													28	26	8.62489e-19
													28	27	3.07579e-21
													29	0	0.00184337
													29	29	4.00872e-25
													29	1	0.013036
													29	2	0.0442919
													29	3	0.0962551
													29	4	0.15027
													29	5	0.179437
													29	6	0.17038
													29	7	0.132036
													29	8	0.085047
													29	9	0.0461351
													29	10	0.021279
													29	11	0.00840212
													29	12	0.00285354
													29	13	0.00083599
													29	14	0.00021155
													29	15	4.6232e-05
													29	16	8.71093e-06
													29	17	1.41047e-06
													29	18	1.95278e-07
													29	19	2.29521e-08
													29	20	2.26786e-09
													29	21	1.85894e-10
													29	22	1.24139e-11
													29	23	6.58558e-13
													29	24	2.67617e-14
													29	25	7.87867e-16
													29	26	1.52996e-17
													29	27	1.62843e-19
													29	28	5.73554e-22
													30	0	0.00148039
													30	30	7.89365e-26
													30	1	0.010832
													30	2	0.0381372
													30	3	0.0860229
													30	4	0.139634
													30	5	0.173694
													30	6	0.172163
													30	7	0.139586
													30	8	0.0942996
													30	9	0.0537973
													30	10	0.0261735
													30	11	0.0109377
													30	12	0.00394612
													30	13	0.00123327
													30	14	0.00033451
													30	15	7.8785e-05
													30	16	1.60993e-05
													30	17	2.84802e-06
													30	18	4.34564e-07
													30	19	5.68851e-08
													30	20	6.34084e-09
													30	21	5.95858e-10
													30	22	4.65742e-11
													30	23	2.97332e-12
													30	24	1.5117e-13
													30	25	5.90243e-15
													30	26	1.67427e-16
													30	27	3.14345e-18
													30	28	3.25264e-20
													30	29	1.13262e-22
													31	0	0.00118788
													31	31	1.5597e-26
													31	1	0.00898423
													31	2	0.032742
													31	3	0.0765612
													31	4	0.129041
													31	5	0.166964
													31	6	0.172466
													31	7	0.146023
													31	8	0.103248
													31	9	0.0618001
													31	10	0.0316317
													31	11	0.0139482
													31	12	0.00532759
													31	13	0.0017693
													31	14	0.000512096
													31	15	0.000129314
													31	16	2.84853e-05
													31	17	5.46633e-06
													31	18	9.11438e-07
													31	19	1.31511e-07
													31	20	1.63279e-08
													31	21	1.73101e-09
													31	22	1.55107e-10
													31	23	1.15884e-11
													31	24	7.08798e-13
													31	25	3.46058e-14
													31	26	1.30061e-15
													31	27	3.56043e-17
													31	28	6.47213e-19
													31	29	6.51776e-21
													31	30	2.24427e-23
													32	0	0.00097711
													32	32	2.76742e-27
													32	1	0.0076009
													32	2	0.0285266
													32	3	0.0687862
													32	4	0.119729
													32	5	0.160235
													32	6	0.171489
													32	7	0.150715
													32	8	0.110837
													32	9	0.0691543
													32	10	0.0369845
													32	11	0.0170858
													32	12	0.00685716
													32	13	0.00240066
													32	14	0.000735165
													32	15	0.000197232
													32	16	4.63756e-05
													32	17	9.55065e-06
													32	18	1.71962e-06
													32	19	2.69895e-07
													32	20	3.6765e-08
													32	21	4.32097e-09
													32	22	4.34723e-10
													32	23	3.70533e-11
													32	24	2.6392e-12
													32	25	1.54229e-13
													32	26	7.21003e-15
													32	27	2.60057e-16
													32	28	6.84973e-18
													32	29	1.20198e-19
													32	30	1.17492e-21
													32	31	3.99489e-24
													33	0	0.000763626
													33	33	6.04641e-28
													33	1	0.0061537
													33	2	0.0239546
													33	3	0.0599901
													33	4	0.108599
													33	5	0.151385
													33	6	0.169031
													33	7	0.155254
													33	8	0.11955
													33	9	0.0782614
													33	10	0.0440132
													33	11	0.0214334
													33	12	0.00909197
													33	13	0.00337434
													33	14	0.00109905
													33	15	0.000314762
													33	16	7.93354e-05
													33	17	1.75964e-05
													33	18	3.43059e-06
													33	19	5.8664e-07
													33	20	8.77005e-08
													33	21	1.14095e-08
													33	22	1.28381e-09
													33	23	1.23938e-10
													33	24	1.01582e-11
													33	25	6.97158e-13
													33	26	3.93316e-14
													33	27	1.77852e-15
													33	28	6.21718e-17
													33	29	1.5905e-18
													33	30	2.71797e-20
													33	31	2.59826e-22
													33	32	8.74987e-25
													34	0	0.000599737
													34	34	1.29768e-28
													34	1	0.00499689
													34	2	0.0201342
													34	3	0.0522562
													34	4	0.0981665
													34	5	0.142202
													34	6	0.165243
													34	7	0.15821
													34	8	0.127213
													34	9	0.0871228
													34	10	0.0513635
													34	11	0.0262794
													34	12	0.0117407
													34	13	0.00460145
													34	14	0.00158737
													34	15	0.000483086
													34	16	0.000129862
													34	17	3.08467e-05
													34	18	6.47083e-06
													34	19	1.19701e-06
													34	20	1.94782e-07
													34	21	2.7783e-08
													34	22	3.45698e-09
													34	23	3.72869e-10
													34	24	3.45776e-11
													34	25	2.72767e-12
													34	26	1.80514e-13
													34	27	9.83814e-15
													34	28	4.30534e-16
													34	29	1.45924e-17
													34	30	3.62699e-19
													34	31	6.03735e-21
													34	32	5.64508e-23
													34	33	1.88264e-25
													35	0	0.000457901
													35	35	3.06896e-29
													35	1	0.00395698
													35	2	0.0165543
													35	3	0.0446595
													35	4	0.0873089
													35	5	0.131788
													35	6	0.159794
													35	7	0.159874
													35	8	0.134544
													35	9	0.0966039
													35	10	0.0598204
													35	11	0.0322117
													35	12	0.015179
													35	13	0.00628985
													35	14	0.00230019
													35	15	0.000744245
													35	16	0.000213398
													35	17	5.42636e-05
													35	18	1.22356e-05
													35	19	2.44425e-06
													35	20	4.31805e-07
													35	21	6.72778e-08
													35	22	9.21001e-09
													35	23	1.10225e-09
													35	24	1.14582e-10
													35	25	1.02601e-11
													35	26	7.82908e-13
													35	27	5.02023e-14
													35	28	2.6554e-15
													35	29	1.12961e-16
													35	30	3.72797e-18
													35	31	9.03865e-20
													35	32	1.47091e-21
													35	33	1.34941e-23
													35	34	4.46228e-26
													36	0	0.000391805
													36	36	4.42992e-30
													36	1	0.0034519
													36	2	0.0147359
													36	3	0.0406026
													36	4	0.0811526
													36	5	0.125368
													36	6	0.155752
													36	7	0.159862
													36	8	0.1382
													36	9	0.10208
													36	10	0.06513
													36	11	0.0361969
													36	12	0.0176376
													36	13	0.00757297
													36	14	0.00287608
													36	15	0.00096884
													36	16	0.000290024
													36	17	7.72341e-05
													36	18	1.83022e-05
													36	19	3.8576e-06
													36	20	7.22293e-07
													36	21	1.19896e-07
													36	22	1.75919e-08
													36	23	2.27257e-09
													36	24	2.57148e-10
													36	25	2.53186e-11
													36	26	2.1509e-12
													36	27	1.55965e-13
													36	28	9.51861e-15
													36	29	4.79952e-16
													36	30	1.94953e-17
													36	31	6.15458e-19
													36	32	1.43055e-20
													36	33	2.23867e-22
													36	34	1.98601e-24
													36	35	6.46739e-27
													37	0	0.000323352
													37	37	7.73962e-31
													37	1	0.00291726
													37	2	0.0127645
													37	3	0.0360834
													37	4	0.074068
													37	5	0.117643
													37	6	0.150443
													37	7	0.159144
													37	8	0.141985
													37	9	0.108391
													37	10	0.0715857
													37	11	0.0412519
													37	12	0.0208802
													37	13	0.00933139
													37	14	0.00369669
													37	15	0.00130206
													37	16	0.000408622
													37	17	0.000114411
													37	18	2.85984e-05
													37	19	6.38125e-06
													37	20	1.27007e-06
													37	21	2.25142e-07
													37	22	3.54656e-08
													37	23	4.94904e-09
													37	24	6.09268e-10
													37	25	6.58221e-11
													37	26	6.19858e-12
													37	27	5.04505e-13
													37	28	3.51047e-14
													37	29	2.05912e-15
													37	30	9.99428e-17
													37	31	3.91401e-18
													37	32	1.19334e-19
													37	33	2.68411e-21
													37	34	4.07513e-23
													37	35	3.52318e-25
													37	36	1.13359e-27
													38	0	0.000246819
													38	38	1.83186e-31
													38	1	0.00230332
													38	2	0.0104338
													38	3	0.0305641
													38	4	0.0650776
													38	5	0.107329
													38	6	0.14268
													38	7	0.157085
													38	8	0.146046
													38	9	0.116342
													38	10	0.0802969
													38	11	0.0484315
													38	12	0.0257019
													38	13	0.0120648
													38	14	0.00503034
													38	15	0.00186883
													38	16	0.000620085
													38	17	0.000184047
													38	18	4.8909e-05
													38	19	1.16397e-05
													38	20	2.47981e-06
													38	21	4.72461e-07
													38	22	8.03593e-08
													38	23	1.21719e-08
													38	24	1.63643e-09
													38	25	1.94448e-10
													38	26	2.03106e-11
													38	27	1.85221e-12
													38	28	1.46205e-13
													38	29	9.88053e-15
													38	30	5.63651e-16
													38	31	2.66427e-17
													38	32	1.01748e-18
													38	33	3.02935e-20
													38	34	6.66396e-22
													38	35	9.91418e-24
													38	36	8.42539e-26
													38	37	2.68895e-28
													39	0	0.000194709
													39	39	3.86752e-32
													39	1	0.00186914
													39	2	0.00871722
													39	3	0.0263141
													39	4	0.0577909
													39	5	0.0984088
													39	6	0.135216
													39	7	0.154044
													39	8	0.148377
													39	9	0.122613
													39	10	0.087907
													39	11	0.0551591
													39	12	0.0305007
													39	13	0.014944
													39	14	0.0065155
													39	15	0.00253631
													39	16	0.000883728
													39	17	0.000276106
													39	18	7.74401e-05
													39	19	1.95082e-05
													39	20	4.41371e-06
													39	21	8.96265e-07
													39	22	1.63142e-07
													39	23	2.6568e-08
													39	24	3.86074e-09
													39	25	4.98888e-10
													39	26	5.70755e-11
													39	27	5.74926e-12
													39	28	5.06387e-13
													39	29	3.86622e-14
													39	30	2.53069e-15
													39	31	1.40019e-16
													39	32	6.42762e-18
													39	33	2.38714e-19
													39	34	6.92145e-21
													39	35	1.48514e-22
													39	36	2.15961e-24
													39	37	1.80003e-26
													39	38	5.69152e-29
													40	0	0.000194709
													40	40	1.07186e-37
													40	1	0.00186914
													40	2	0.0087172
													40	3	0.026314
													40	4	0.0577908
													40	5	0.0984087
													40	6	0.135216
													40	7	0.154043
													40	8	0.148377
													40	9	0.122613
													40	10	0.0879071
													40	11	0.0551592
													40	12	0.0305007
													40	13	0.014944
													40	14	0.00651553
													40	15	0.00253632
													40	16	0.000883733
													40	17	0.000276107
													40	18	7.74406e-05
													40	19	1.95084e-05
													40	20	4.41375e-06
													40	21	8.96275e-07
													40	22	1.63144e-07
													40	23	2.65684e-08
													40	24	3.8608e-09
													40	25	4.98897e-10
													40	26	5.70767e-11
													40	27	5.7494e-12
													40	28	5.06401e-13
													40	29	3.86635e-14
													40	30	2.53079e-15
													40	31	1.40026e-16
													40	32	6.42799e-18
													40	33	2.38731e-19
													40	34	6.92209e-21
													40	35	1.48533e-22
													40	36	2.16001e-24
													40	37	1.80062e-26
													40	38	5.6965e-29
													40	39	3.88329e-32
													41	0	0.000164188
													41	41	1.68016e-38
													41	1	0.00160667
													41	2	0.00764375
													41	3	0.0235557
													41	4	0.0528568
													41	5	0.0920417
													41	6	0.129447
													41	7	0.151092
													41	8	0.149265
													41	9	0.126652
													41	10	0.0933474
													41	11	0.0602925
													41	12	0.034366
													41	13	0.0173826
													41	14	0.00783671
													41	15	0.00316007
													41	16	0.00114278
													41	17	0.000371354
													41	18	0.000108582
													41	19	2.85894e-05
													41	20	6.77987e-06
													41	21	1.44765e-06
													41	22	2.78064e-07
													41	23	4.7977e-08
													41	24	7.42027e-09
													41	25	1.02588e-09
													41	26	1.26333e-10
													41	27	1.37951e-11
													41	28	1.32825e-12
													41	29	1.11982e-13
													41	30	8.19466e-15
													41	31	5.14783e-16
													41	32	2.73697e-17
													41	33	1.20891e-18
													41	34	4.32587e-20
													41	35	1.2103e-21
													41	36	2.51043e-23
													41	37	3.5377e-25
													41	38	2.87055e-27
													41	39	8.96213e-30
													41	40	6.08723e-33
													42	0	0.000138628
													42	42	2.61557e-39
													42	1	0.00138211
													42	2	0.00670394
													42	3	0.0210786
													42	4	0.0482953
													42	5	0.0859417
													42	6	0.123624
													42	7	0.147723
													42	8	0.149549
													42	9	0.130172
													42	10	0.098532
													42	11	0.0654383
													42	12	0.0384021
													42	13	0.0200264
													42	14	0.00932275
													42	15	0.0038881
													42	16	0.00145682
													42	17	0.000491445
													42	18	0.000149489
													42	19	4.10422e-05
													42	20	1.0175e-05
													42	21	2.27773e-06
													42	22	4.60138e-07
													42	23	8.37956e-08
													42	24	1.37339e-08
													42	25	2.02132e-09
													42	26	2.6637e-10
													42	27	3.13143e-11
													42	28	3.26901e-12
													42	29	3.01324e-13
													42	30	2.43517e-14
													42	31	1.71034e-15
													42	32	1.03247e-16
													42	33	5.28147e-18
													42	34	2.2472e-19
													42	35	7.75614e-21
													42	36	2.09609e-22
													42	37	4.20679e-24
													42	38	5.74965e-26
													42	39	4.54437e-28
													42	40	1.40031e-30
													42	41	9.47637e-34
													43	0	0.000117047
													43	43	4.07176e-40
													43	1	0.00118853
													43	2	0.00587547
													43	3	0.0188408
													43	4	0.0440584
													43	5	0.0800811
													43	6	0.117758
													43	7	0.143971
													43	8	0.149265
													43	9	0.133189
													43	10	0.103458
													43	11	0.0705901
													43	12	0.0426109
													43	13	0.022887
													43	14	0.010989
													43	15	0.00473413
													43	16	0.00183531
													43	17	0.000641729
													43	18	0.000202722
													43	19	5.79245e-05
													43	20	1.49803e-05
													43	21	3.50714e-06
													43	22	7.4309e-07
													43	23	1.42382e-07
													43	24	2.46407e-08
													43	25	3.84466e-09
													43	26	5.3957e-10
													43	27	6.79063e-11
													43	28	7.63493e-12
													43	29	7.63316e-13
													43	30	6.74691e-14
													43	31	5.23501e-15
													43	32	3.5343e-16
													43	33	2.05322e-17
													43	34	1.01192e-18
													43	35	4.15318e-20
													43	36	1.38441e-21
													43	37	3.61826e-23
													43	38	7.03433e-25
													43	39	9.3344e-27
													43	40	7.19263e-29
													43	41	2.18792e-31
													43	42	1.47525e-34
													44	0	9.39332e-05
													44	44	8.04074e-41
													44	1	0.00097694
													44	2	0.00494991
													44	3	0.0162805
													44	4	0.0390786
													44	5	0.0729675
													44	6	0.110317
													44	7	0.138794
													44	8	0.14822
													44	9	0.136363
													44	10	0.109329
													44	11	0.0770806
													44	12	0.0481361
													44	13	0.026782
													44	14	0.0133386
													44	15	0.00596932
													44	16	0.00240775
													44	17	0.000877431
													44	18	0.000289415
													44	19	8.65186e-05
													44	20	2.34607e-05
													44	21	5.7728e-06
													44	22	1.28892e-06
													44	23	2.61007e-07
													44	24	4.78918e-08
													44	25	7.95137e-09
													44	26	1.19225e-09
													44	27	1.61048e-10
													44	28	1.95371e-11
													44	29	2.12029e-12
													44	30	2.04882e-13
													44	31	1.75247e-14
													44	32	1.31742e-15
													44	33	8.62713e-17
													44	34	4.8667e-18
													44	35	2.33161e-19
													44	36	9.31254e-21
													44	37	3.02424e-22
													44	38	7.7097e-24
													44	39	1.46402e-25
													44	40	1.90104e-27
													44	41	1.43793e-29
													44	42	4.33245e-32
													44	43	2.91329e-35
													45	0	7.75253e-05
													45	45	1.40453e-41
													45	1	0.0008227
													45	2	0.00425593
													45	3	0.0143013
													45	4	0.0350963
													45	5	0.0670479
													45	6	0.103793
													45	7	0.13382
													45	8	0.146573
													45	9	0.138434
													45	10	0.114051
													45	11	0.0827136
													45	12	0.053192
													45	13	0.0305121
													45	14	0.0156868
													45	15	0.00725656
													45	16	0.00302988
													45	17	0.00114474
													45	18	0.000392128
													45	19	0.00012196
													45	20	3.44754e-05
													45	21	8.86245e-06
													45	22	2.07215e-06
													45	23	4.4056e-07
													45	24	8.5118e-08
													45	25	1.4928e-08
													45	26	2.3729e-09
													45	27	3.41174e-10
													45	28	4.42557e-11
													45	29	5.16259e-12
													45	30	5.39459e-13
													45	31	5.02516e-14
													45	32	4.14845e-15
													45	33	3.01324e-16
													45	34	1.90862e-17
													45	35	1.04253e-18
													45	36	4.84135e-20
													45	37	1.87628e-21
													45	38	5.91893e-23
													45	39	1.46753e-24
													45	40	2.71419e-26
													45	41	3.43934e-28
													45	42	2.54748e-30
													45	43	7.5918e-33
													45	44	5.08888e-36
													46	0	6.03411e-05
													46	46	3.11327e-42
													46	1	0.000657525
													46	2	0.00349492
													46	3	0.0120747
													46	4	0.0304869
													46	5	0.0599655
													46	6	0.0956483
													46	7	0.127164
													46	8	0.143746
													46	9	0.140238
													46	10	0.119456
													46	11	0.0896598
													46	12	0.0597358
													46	13	0.0355393
													46	14	0.018973
													46	15	0.00912521
													46	16	0.00396676
													46	17	0.0015626
													46	18	0.000558952
													46	19	0.000181845
													46	20	5.38672e-05
													46	21	1.45398e-05
													46	22	3.57728e-06
													46	23	8.02217e-07
													46	24	1.63905e-07
													46	25	3.04863e-08
													46	26	5.15586e-09
													46	27	7.91526e-10
													46	28	1.1007e-10
													46	29	1.3828e-11
													46	30	1.56422e-12
													46	31	1.58689e-13
													46	32	1.43676e-14
													46	33	1.15408e-15
													46	34	8.16469e-17
													46	35	5.04207e-18
													46	36	2.68769e-19
													46	37	1.21917e-20
													46	38	4.61964e-22
													46	39	1.42621e-23
													46	40	3.46418e-25
													46	41	6.28396e-27
													46	42	7.8219e-29
													46	43	5.70581e-31
													46	44	1.68675e-33
													46	45	1.12801e-36
													47	0	4.58471e-05
													47	47	7.47807e-43
													47	1	0.000514081
													47	2	0.00281338
													47	3	0.0100138
													47	4	0.0260643
													47	5	0.0528847
													47	6	0.0870773
													47	7	0.119594
													47	8	0.139763
													47	9	0.141081
													47	10	0.124448
													47	11	0.0968168
													47	12	0.0669235
													47	13	0.0413513
													47	14	0.0229522
													47	15	0.0114907
													47	16	0.00520582
													47	17	0.00214008
													47	18	0.000800028
													47	19	0.000272426
													47	20	8.46075e-05
													47	21	2.39862e-05
													47	22	6.21049e-06
													47	23	1.46879e-06
													47	24	3.17228e-07
													47	25	6.25335e-08
													47	26	1.12402e-08
													47	27	1.83984e-09
													47	28	2.73756e-10
													47	29	3.69454e-11
													47	30	4.50997e-12
													47	31	4.96298e-13
													47	32	4.90337e-14
													47	33	4.32798e-15
													47	34	3.39245e-16
													47	35	2.34426e-17
													47	36	1.41532e-18
													47	37	7.38216e-20
													47	38	3.27945e-21
													47	39	1.218e-22
													47	40	3.68897e-24
													47	41	8.79842e-26
													47	42	1.56884e-27
													47	43	1.92218e-29
													47	44	1.38335e-31
													47	45	4.06016e-34
													47	46	2.70951e-37
													48	0	4.24641e-05
													48	48	5.51808e-44
													48	1	0.00047953
													48	2	0.00264371
													48	3	0.00948248
													48	4	0.0248799
													48	5	0.0509057
													48	6	0.0845542
													48	7	0.117195
													48	8	0.138275
													48	9	0.140984
													48	10	0.125675
													48	11	0.0988557
													48	12	0.0691294
													48	13	0.0432383
													48	14	0.0243099
													48	15	0.0123364
													48	16	0.00566958
													48	17	0.0023663
													48	18	0.000898911
													48	19	0.000311358
													48	20	9.84667e-05
													48	21	2.84595e-05
													48	22	7.52216e-06
													48	23	1.81868e-06
													48	24	4.02202e-07
													48	25	8.13274e-08
													48	26	1.50252e-08
													48	27	2.5335e-09
													48	28	3.89318e-10
													48	29	5.44197e-11
													48	30	6.90339e-12
													48	31	7.92467e-13
													48	32	8.20373e-14
													48	33	7.62682e-15
													48	34	6.33574e-16
													48	35	4.67457e-17
													48	36	3.04071e-18
													48	37	1.72811e-19
													48	38	8.48476e-21
													48	39	3.54803e-22
													48	40	1.24044e-23
													48	41	3.53701e-25
													48	42	7.94543e-27
													48	43	1.33568e-28
													48	44	1.5465e-30
													48	45	1.05838e-32
													48	46	3.02109e-35
													48	47	1.99942e-38
													49	0	3.65549e-05
													49	49	7.67875e-45
													49	1	0.00041871
													49	2	0.00234255
													49	3	0.00853083
													49	4	0.0227372
													49	5	0.047284
													49	6	0.0798718
													49	7	0.112653
													49	8	0.135342
													49	9	0.140607
													49	10	0.127805
													49	11	0.102588
													49	12	0.073266
													49	13	0.0468412
													49	14	0.0269439
													49	15	0.0140026
													49	16	0.00659731
													49	17	0.00282597
													49	18	0.00110311
													49	19	0.00039312
													49	20	0.000128092
													49	21	3.82014e-05
													49	22	1.04357e-05
													49	23	2.61235e-06
													49	24	5.99313e-07
													49	25	1.25979e-07
													49	26	2.42515e-08
													49	27	4.27179e-09
													49	28	6.87694e-10
													49	29	1.01023e-10
													49	30	1.35156e-11
													49	31	1.64284e-12
													49	32	1.80898e-13
													49	33	1.79815e-14
													49	34	1.60673e-15
													49	35	1.28407e-16
													49	36	9.12253e-18
													49	37	5.71897e-19
													49	38	3.13517e-20
													49	39	1.48614e-21
													49	40	6.00514e-23
													49	41	2.03063e-24
													49	42	5.60595e-26
													49	43	1.22064e-27
													49	44	1.99182e-29
													49	45	2.24317e-31
													49	46	1.49881e-33
													49	47	4.22125e-36
													49	48	2.78236e-39
													50	0	2.8311e-05
													50	50	1.73172e-45
													50	1	0.000332526
													50	2	0.00190868
													50	3	0.00713524
													50	4	0.0195334
													50	5	0.0417482
													50	6	0.0725226
													50	7	0.10526
													50	8	0.130225
													50	9	0.139419
													50	10	0.130692
													50	11	0.108275
													50	12	0.0798787
													50	13	0.0528005
													50	14	0.0314312
													50	15	0.0169211
													50	16	0.00826736
													50	17	0.00367649
													50	18	0.00149165
													50	19	0.000553237
													50	20	0.000187861
													50	21	5.84736e-05
													50	22	1.66975e-05
													50	23	4.37669e-06
													50	24	1.0533e-06
													50	25	2.32726e-07
													50	26	4.71933e-08
													50	27	8.77765e-09
													50	28	1.49598e-09
													50	29	2.3333e-10
													50	30	3.32503e-11
													50	31	4.3204e-12
													50	32	5.10597e-13
													50	33	5.47226e-14
													50	34	5.29959e-15
													50	35	4.61799e-16
													50	36	3.60236e-17
													50	37	2.50025e-18
													50	38	1.53256e-19
													50	39	8.22146e-21
													50	40	3.81664e-22
													50	41	1.51155e-23
													50	42	5.01368e-25
													50	43	1.3588e-26
													50	44	2.90706e-28
													50	45	4.66569e-30
													50	46	5.17489e-32
													50	47	3.41284e-34
													50	48	9.54136e-37
													50	49	6.27487e-40
													51	0	2.30898e-05
													51	51	3.19372e-46
													51	1	0.000276421
													51	2	0.001618
													51	3	0.00617133
													51	4	0.0172469
													51	5	0.0376512
													51	6	0.066847
													51	7	0.0992223
													51	8	0.125621
													51	9	0.137724
													51	10	0.132302
													51	11	0.112409
													51	12	0.0851156
													51	13	0.0577944
													51	14	0.0353722
													51	15	0.0195971
													51	16	0.00986333
													51	17	0.00452316
													51	18	0.00189459
													51	19	0.000726304
													51	20	0.000255246
													51	21	8.23359e-05
													51	22	2.4402e-05
													51	23	6.64895e-06
													51	24	1.66621e-06
													51	25	3.8406e-07
													51	26	8.14101e-08
													51	27	1.58624e-08
													51	28	2.8389e-09
													51	29	4.66194e-10
													51	30	7.01499e-11
													51	31	9.6558e-12
													51	32	1.21322e-12
													51	33	1.38797e-13
													51	34	1.44144e-14
													51	35	1.35401e-15
													51	36	1.14547e-16
													51	37	8.68278e-18
													51	38	5.86099e-19
													51	39	3.49695e-20
													51	40	1.82752e-21
													51	41	8.27162e-23
													51	42	3.19658e-24
													51	43	1.03547e-25
													51	44	2.74305e-27
													51	45	5.74186e-29
													51	46	9.02675e-31
													51	47	9.82214e-33
													51	48	6.37194e-35
													51	49	1.76478e-37
													51	50	1.15726e-40
													52	0	2.18074e-05
													52	52	1.77379e-47
													52	1	0.000262351
													52	2	0.00154349
													52	3	0.00591844
													52	4	0.0166317
													52	5	0.036518
													52	6	0.0652255
													52	7	0.0974242
													52	8	0.124155
													52	9	0.137052
													52	10	0.132603
													52	11	0.113514
													52	12	0.0866315
													52	13	0.0593118
													52	14	0.0366175
													52	15	0.0204733
													52	16	0.0104039
													52	17	0.00481975
													52	18	0.00204058
													52	19	0.00079119
													52	20	0.000281408
													52	21	9.19393e-05
													52	22	2.76197e-05
													52	23	7.63495e-06
													52	24	1.94295e-06
													52	25	4.5527e-07
													52	26	9.82192e-08
													52	27	1.9503e-08
													52	28	3.56223e-09
													52	29	5.97974e-10
													52	30	9.21462e-11
													52	31	1.30156e-11
													52	32	1.68212e-12
													52	33	1.9847e-13
													52	34	2.13226e-14
													52	35	2.07938e-15
													52	36	1.83387e-16
													52	37	1.45625e-17
													52	38	1.03579e-18
													52	39	6.55792e-20
													52	40	3.66822e-21
													52	41	1.79622e-22
													52	42	7.6131e-24
													52	43	2.75334e-25
													52	44	8.34168e-27
													52	45	2.06578e-28
													52	46	4.04157e-30
													52	47	5.94111e-32
													52	48	6.05701e-34
													52	49	3.70564e-36
													52	50	9.91088e-39
													52	51	6.4277e-42
													53	0	1.65779e-05
													53	53	4.25363e-48
													53	1	0.000204667
													53	2	0.00123627
													53	3	0.00486931
													53	4	0.0140626
													53	5	0.0317492
													53	6	0.0583413
													53	7	0.0897028
													53	8	0.117744
													53	9	0.133959
													53	10	0.13367
													53	11	0.118092
													53	12	0.0930781
													53	13	0.0658632
													53	14	0.0420597
													53	15	0.0243448
													53	16	0.0128186
													53	17	0.00615887
													53	18	0.00270704
													53	19	0.0010908
													53	20	0.000403656
													53	21	0.000137375
													53	22	4.30438e-05
													53	23	1.24274e-05
													53	24	3.30792e-06
													53	25	8.12023e-07
													53	26	1.83842e-07
													53	27	3.83795e-08
													53	28	7.38488e-09
													53	29	1.30882e-09
													53	30	2.13446e-10
													53	31	3.19915e-11
													53	32	4.39995e-12
													53	33	5.54256e-13
													53	34	6.38035e-14
													53	35	6.694e-15
													53	36	6.38055e-16
													53	37	5.50473e-17
													53	38	4.27955e-18
													53	39	2.9824e-19
													53	40	1.85147e-20
													53	41	1.0162e-21
													53	42	4.88617e-23
													53	43	2.03496e-24
													53	44	7.23675e-26
													53	45	2.15741e-27
													53	46	5.26108e-29
													53	47	1.01435e-30
													53	48	1.47075e-32
													53	49	1.48067e-34
													53	50	8.96164e-37
													53	51	2.38156e-39
													53	52	1.5414e-42
													54	0	1.34735e-05
													54	54	7.96527e-49
													54	1	0.000169446
													54	2	0.00104309
													54	3	0.00418899
													54	4	0.0123411
													54	5	0.0284372
													54	6	0.0533617
													54	7	0.0838301
													54	8	0.112493
													54	9	0.130923
													54	10	0.133724
													54	11	0.121009
													54	12	0.0977621
													54	13	0.0709594
													54	14	0.0465171
													54	15	0.027662
													54	16	0.014977
													54	17	0.00740596
													54	18	0.00335342
													54	19	0.00139345
													54	20	0.000532329
													54	21	0.000187238
													54	22	6.0708e-05
													54	23	1.81606e-05
													54	24	5.01561e-06
													54	25	1.2794e-06
													54	26	3.01474e-07
													54	27	6.56184e-08
													54	28	1.31889e-08
													54	29	2.44661e-09
													54	30	4.18563e-10
													54	31	6.59703e-11
													54	32	9.56669e-12
													54	33	1.27439e-12
													54	34	1.55645e-13
													54	35	1.73882e-14
													54	36	1.77208e-15
													54	37	1.6422e-16
													54	38	1.37862e-17
													54	39	1.04377e-18
													54	40	7.08955e-20
													54	41	4.29295e-21
													54	42	2.30004e-22
													54	43	1.08036e-23
													54	44	4.39879e-25
													54	45	1.53048e-26
													54	46	4.46752e-28
													54	47	1.06762e-29
													54	48	2.01899e-31
													54	49	2.87444e-33
													54	50	2.8455e-35
													54	51	1.6975e-37
													54	52	4.47219e-40
													54	53	2.88644e-43
													55	0	1.10429e-05
													55	55	1.43696e-49
													55	1	0.000141308
													55	2	0.000885484
													55	3	0.00362146
													55	4	0.0108704
													55	5	0.0255334
													55	6	0.0488653
													55	7	0.0783335
													55	8	0.107322
													55	9	0.127598
													55	10	0.133219
													55	11	0.123303
													55	12	0.101956
													55	13	0.0757947
													55	14	0.0509266
													55	15	0.0310635
													55	16	0.0172654
													55	17	0.00877179
													55	18	0.00408451
													55	19	0.00174704
													55	20	0.000687679
													55	21	0.000249494
													55	22	8.35344e-05
													55	23	2.58362e-05
													55	24	7.387e-06
													55	25	1.95342e-06
													55	26	4.77895e-07
													55	27	1.08167e-07
													55	28	2.26473e-08
													55	29	4.38455e-09
													55	30	7.84428e-10
													55	31	1.29579e-10
													55	32	1.97421e-11
													55	33	2.77035e-12
													55	34	3.5747e-13
													55	35	4.23301e-14
													55	36	4.58928e-15
													55	37	4.54283e-16
													55	38	4.09249e-17
													55	39	3.34255e-18
													55	40	2.46405e-19
													55	41	1.63082e-20
													55	42	9.62971e-22
													55	43	5.03481e-23
													55	44	2.30953e-24
													55	45	9.18993e-26
													55	46	3.12719e-27
													55	47	8.93455e-29
													55	48	2.09149e-30
													55	49	3.8779e-32
													55	50	5.41879e-34
													55	51	5.2725e-36
													55	52	3.09899e-38
													55	53	8.09162e-41
													55	54	5.20728e-44
													56	0	8.8516e-06
													56	56	2.85139e-50
													56	1	0.000115459
													56	2	0.000737815
													56	3	0.00307856
													56	4	0.00943201
													56	5	0.0226238
													56	6	0.0442355
													56	7	0.0724861
													56	8	0.10157
													56	9	0.123575
													56	10	0.132103
													56	11	0.12527
													56	12	0.106192
													56	13	0.0809859
													56	14	0.0558612
													56	15	0.035005
													56	16	0.0200034
													56	17	0.0104572
													56	18	0.00501462
													56	19	0.00221087
													56	20	0.000897889
													56	21	0.000336444
													56	22	0.000116466
													56	23	3.72854e-05
													56	24	1.10479e-05
													56	25	3.03162e-06
													56	26	7.70687e-07
													56	27	1.81533e-07
													56	28	3.96173e-08
													56	29	8.00847e-09
													56	30	1.49881e-09
													56	31	2.59522e-10
													56	32	4.15373e-11
													56	33	6.13808e-12
													56	34	8.36263e-13
													56	35	1.04864e-13
													56	36	1.20783e-14
													56	37	1.2748e-15
													56	38	1.22948e-16
													56	39	1.08001e-17
													56	40	8.6078e-19
													56	41	6.19669e-20
													56	42	4.00797e-21
													56	43	2.31442e-22
													56	44	1.18419e-23
													56	45	5.31949e-25
													56	46	2.07424e-26
													56	47	6.92152e-28
													56	48	1.94055e-29
													56	49	4.46104e-31
													56	50	8.12935e-33
													56	51	1.11753e-34
													56	52	1.07107e-36
													56	53	6.21425e-39
													56	54	1.60981e-41
													56	55	1.0333e-44
													57	0	7.19147e-06
													57	57	5.34782e-51
													57	1	9.54649e-05
													57	2	0.000621092
													57	3	0.00263955
													57	4	0.00824041
													57	5	0.0201497
													57	6	0.0401822
													57	7	0.0671876
													57	8	0.0961154
													57	9	0.119448
													57	10	0.130504
													57	11	0.126552
													57	12	0.10977
													57	13	0.0857133
													57	14	0.0605734
													57	15	0.0389166
													57	16	0.022817
													57	17	0.0122476
													57	18	0.00603538
													57	19	0.00273671
													57	20	0.00114414
													57	21	0.000441744
													57	22	0.000157723
													57	23	5.21359e-05
													57	24	1.59688e-05
													57	25	4.53509e-06
													57	26	1.19473e-06
													57	27	2.9203e-07
													57	28	6.62338e-08
													57	29	1.39367e-08
													57	30	2.7197e-09
													57	31	4.91952e-10
													57	32	8.24207e-11
													57	33	1.27773e-11
													57	34	1.83063e-12
													57	35	2.42039e-13
													57	36	2.94804e-14
													57	37	3.30101e-15
													57	38	3.3898e-16
													57	39	3.18337e-17
													57	40	2.72492e-18
													57	41	2.11785e-19
													57	42	1.48783e-20
													57	43	9.39735e-22
													57	44	5.30282e-23
													57	45	2.65315e-24
													57	46	1.1662e-25
													57	47	4.45261e-27
													57	48	1.4558e-28
													57	49	4.00197e-30
													57	50	9.02721e-32
													57	51	1.61547e-33
													57	52	2.18295e-35
													57	53	2.0593e-37
													57	54	1.17857e-39
													57	55	3.02762e-42
													57	56	1.938e-45
													58	0	5.74445e-06
													58	58	1.07605e-51
													58	1	7.77031e-05
													58	2	0.000515328
													58	3	0.00223341
													58	4	0.00711344
													58	5	0.0177534
													58	6	0.0361514
													58	7	0.0617538
													58	8	0.0902947
													58	9	0.114753
													58	10	0.128279
													58	11	0.127347
													58	12	0.113147
													58	13	0.0905538
													58	14	0.0656319
													58	15	0.0432743
													58	16	0.0260564
													58	17	0.0143743
													58	18	0.00728537
													58	19	0.00340045
													58	20	0.00146459
													58	21	0.000583075
													58	22	0.000214872
													58	23	7.33815e-05
													58	24	2.32461e-05
													58	25	6.83571e-06
													58	26	1.86685e-06
													58	27	4.73665e-07
													58	28	1.11667e-07
													58	29	2.44596e-08
													58	30	4.97673e-09
													58	31	9.40206e-10
													58	32	1.64824e-10
													58	33	2.67905e-11
													58	34	4.03324e-12
													58	35	5.61684e-13
													58	36	7.225e-14
													58	37	8.56865e-15
													58	38	9.3498e-16
													58	39	9.36356e-17
													58	40	8.582e-18
													58	41	7.17461e-19
													58	42	5.44987e-20
													58	43	3.74435e-21
													58	44	2.31446e-22
													58	45	1.27893e-23
													58	46	6.27005e-25
													58	47	2.70222e-26
													58	48	1.01221e-27
													58	49	3.24894e-29
													58	50	8.77359e-31
													58	51	1.94544e-32
													58	52	3.42491e-34
													58	53	4.5569e-36
													58	54	4.23774e-38
													58	55	2.39563e-40
													58	56	6.10747e-43
													58	57	3.89956e-46
													59	0	4.39236e-06
													59	59	2.53273e-52
													59	1	6.0766e-05
													59	2	0.000412323
													59	3	0.00182902
													59	4	0.00596482
													59	5	0.015249
													59	6	0.031821
													59	7	0.0557277
													59	8	0.083577
													59	9	0.108996
													59	10	0.125095
													59	11	0.127566
													59	12	0.116489
													59	13	0.0958716
													59	14	0.0714978
													59	15	0.0485366
													59	16	0.030109
													59	17	0.017124
													59	18	0.00895391
													59	19	0.00431485
													59	20	0.00192024
													59	21	0.000790559
													59	22	0.000301537
													59	23	0.000106684
													59	24	3.50466e-05
													59	25	1.06983e-05
													59	26	3.03639e-06
													59	27	8.01584e-07
													59	28	1.96871e-07
													59	29	4.49859e-08
													59	30	9.56246e-09
													59	31	1.89029e-09
													59	32	3.47328e-10
													59	33	5.92798e-11
													59	34	9.38966e-12
													59	35	1.37879e-12
													59	36	1.87449e-13
													59	37	2.35575e-14
													59	38	2.73174e-15
													59	39	2.91665e-16
													59	40	2.86013e-17
													59	41	2.56856e-18
													59	42	2.10542e-19
													59	43	1.56905e-20
													59	44	1.05829e-21
													59	45	6.4255e-23
													59	46	3.48967e-24
													59	47	1.68242e-25
													59	48	7.13426e-27
													59	49	2.6309e-28
													59	50	8.31797e-30
													59	51	2.21381e-31
													59	52	4.84091e-33
													59	53	8.40972e-35
													59	54	1.10497e-36
													59	55	1.01577e-38
													59	56	5.68535e-41
													59	57	1.44051e-43
													59	58	9.17858e-47
													60	0	3.50845e-06
													60	60	5.09684e-53
													60	1	4.94215e-05
													60	2	0.000341576
													60	3	0.00154392
													60	4	0.00513253
													60	5	0.0133807
													60	6	0.0284861
													60	7	0.0509167
													60	8	0.0779726
													60	9	0.103881
													60	10	0.121856
													60	11	0.127069
													60	12	0.118718
													60	13	0.100021
													60	14	0.0764028
													60	15	0.0531573
													60	16	0.0338174
													60	17	0.0197371
													60	18	0.010598
													60	19	0.00524841
													60	20	0.00240213
													60	21	0.00101789
													60	22	0.000399947
													60	23	0.000145896
													60	24	4.94629e-05
													60	25	1.55981e-05
													60	26	4.57825e-06
													60	27	1.25131e-06
													60	28	3.18563e-07
													60	29	7.55511e-08
													60	30	1.6691e-08
													60	31	3.43423e-09
													60	32	6.57832e-10
													60	33	1.17246e-10
													60	34	1.94295e-11
													60	35	2.99089e-12
													60	36	4.27194e-13
													60	37	5.65389e-14
													60	38	6.92268e-15
													60	39	7.82701e-16
													60	40	8.15398e-17
													60	41	7.80735e-18
													60	42	6.85065e-19
													60	43	5.49021e-20
													60	44	4.00286e-21
													60	45	2.64293e-22
													60	46	1.5718e-23
													60	47	8.36642e-25
													60	48	3.95553e-26
													60	49	1.64583e-27
													60	50	5.95879e-29
													60	51	1.85073e-30
													60	52	4.84172e-32
													60	53	1.04135e-33
													60	54	1.78062e-35
													60	55	2.30476e-37
													60	56	2.08952e-39
													60	57	1.15562e-41
													60	58	2.9062e-44
													60	59	1.84711e-47
													61	0	2.57514e-06
													61	61	1.35584e-53
													61	1	3.72078e-05
													61	2	0.000263858
													61	3	0.00122408
													61	4	0.0041779
													61	5	0.0111865
													61	6	0.0244678
													61	7	0.0449498
													61	8	0.0707753
													61	9	0.0969888
													61	10	0.117074
													61	11	0.125682
													61	12	0.12094
													61	13	0.104994
													61	14	0.0826855
													61	15	0.059341
													61	16	0.0389621
													61	17	0.0234827
													61	18	0.0130292
													61	19	0.0066715
													61	20	0.00315929
													61	21	0.00138612
													61	22	0.000564331
													61	23	0.000213478
													61	24	7.51158e-05
													61	25	2.46067e-05
													61	26	7.50971e-06
													61	27	2.13633e-06
													61	28	5.6669e-07
													61	29	1.40196e-07
													61	30	3.23488e-08
													61	31	6.96076e-09
													61	32	1.3964e-09
													61	33	2.61051e-10
													61	34	4.54503e-11
													61	35	7.36383e-12
													61	36	1.10918e-12
													61	37	1.55139e-13
													61	38	2.01214e-14
													61	39	2.41604e-15
													61	40	2.68061e-16
													61	41	2.74214e-17
													61	42	2.57971e-18
													61	43	2.22536e-19
													61	44	1.75429e-20
													61	45	1.25881e-21
													61	46	8.18431e-23
													61	47	4.79533e-24
													61	48	2.51594e-25
													61	49	1.17304e-26
													61	50	4.81556e-28
													61	51	1.72098e-29
													61	52	5.27862e-31
													61	53	1.36441e-32
													61	54	2.90086e-34
													61	55	4.90592e-36
													61	56	6.28442e-38
													61	57	5.64331e-40
													61	58	3.09547e-42
													61	59	7.74453e-45
													61	60	4.91365e-48
													62	0	2.0269e-06
													62	62	2.88656e-54
													62	1	2.98346e-05
													62	2	0.000215605
													62	3	0.00101965
													62	4	0.00354904
													62	5	0.00969442
													62	6	0.0216402
													62	7	0.0405892
													62	8	0.0652771
													62	9	0.091408
													62	10	0.112798
													62	11	0.12385
													62	12	0.121949
													62	13	0.108389
													62	14	0.087435
													62	15	0.064311
													62	16	0.0433007
													62	17	0.0267782
													62	18	0.0152547
													62	19	0.00802503
													62	20	0.00390703
													62	21	0.00176362
													62	22	0.000739289
													62	23	0.000288174
													62	24	0.000104573
													62	25	3.536e-05
													62	26	1.11496e-05
													62	27	3.28031e-06
													62	28	9.00863e-07
													62	29	2.30996e-07
													62	30	5.53093e-08
													62	31	1.23658e-08
													62	32	2.58104e-09
													62	33	5.02764e-10
													62	34	9.13511e-11
													62	35	1.54723e-11
													62	36	2.44078e-12
													62	37	3.58252e-13
													62	38	4.88664e-14
													62	39	6.18547e-15
													62	40	7.2536e-16
													62	41	7.86529e-17
													62	42	7.86845e-18
													62	43	7.24373e-19
													62	44	6.11855e-20
													62	45	4.72566e-21
[truncated: 1,046,576+ more rows]

## Sheet: sheet1
	0	1	2	3	4	5	6	7	8	9	10	11	12	13	14	15	16
0	1	0.781756	0.583856	0.472565	0.397907	0.301103	0.300827	0.227986	0.190065	0.153288	0.116425	0.0907408	0.0688688	0.0553564	0.052755	0.0443858	0.0326546
1		0.170614	0.325323	0.374603	0.390079	0.391984	0.3919	0.369848	0.346253	0.316031	0.276894	0.241493	0.205156	0.178416	0.172633	0.153615	0.124746
2			0.0431904	0.0969688	0.140831	0.201469	0.201643	0.247712	0.268026	0.283163	0.291067	0.28794	0.276745	0.262699	0.258738	0.245078	0.220904
3				0.0082327	0.0222516	0.0510999	0.0512379	0.0876566	0.114278	0.144028	0.177487	0.202544	0.223128	0.233648	0.235013	0.238777	0.240442
4					0.00130064	0.00639765	0.00643869	0.0172862	0.0289907	0.0454936	0.0691893	0.0930808	0.119466	0.139805	0.144215	0.158619	0.179805
5						0.000316423	0.000322006	0.00180308	0.00437834	0.00914078	0.017883	0.0292016	0.0445989	0.0592882	0.0630719	0.0759446	0.0977956
6							2.90502e-07	7.81896e-05	0.000365085	0.00114164	0.00306529	0.00633419	0.0118461	0.0182724	0.0201998	0.0270012	0.039937
7								7.03412e-08	1.30637e-05	8.1179e-05	0.000336201	0.000938261	0.00223889	0.00412388	0.00478875	0.00723362	0.0124582
8									1.16996e-08	2.53723e-06	2.14491e-05	9.0886e-05	0.000295136	0.00067651	0.000838512	0.00146519	0.00298979
9										2.26385e-09	6.11876e-07	5.20875e-06	2.58603e-05	7.86935e-05	0.000106787	0.00022287	0.000551216
10											5.44415e-10	1.35409e-07	1.35828e-06	6.1657e-06	9.57399e-06	2.49961e-05	7.72943e-05
11												1.20103e-10	3.273e-08	2.9281e-07	5.68794e-07	1.99741e-06	8.07599e-06
12													2.89493e-11	6.44507e-09	1.99022e-08	1.0698e-07	6.06622e-07
13														5.68001e-12	3.08285e-10	3.41673e-09	3.07886e-08
14															2.6692e-13	4.9132e-11	9.39189e-10
15																4.23451e-14	1.30168e-11
16																	1.11918e-14
