# Supplementary material for: Probabilistic En Route Sector Traffic Demand Prediction Based upon Statistical Analysis of Error Distribution Characteristics
Source: Hindawi journal article supplement (doi:10.1155/2018/8184513), 2018-08-13
Supplement: f1 [file 8184513.f1.rar › Fig.8 AR06-0700-0714.xlsx]

## Sheet: 0700-0714
CALLSIGN	PASSSECTOR	EINSECTORTIME	EOUTSECTORTIME	OPINSECTORTIME	OPOUTSECTORTIME	ATD	FlyTime	Predicted Time Error ∆ti(in)	Predicted Time Error ∆ti(out)	probability distribution(in)	probability distribution(out)	The probability of the aircraft in AR08	0	0	1
CSC8918	ZGGGAR06	2014-05-01 07:02:39	2014-05-01 07:14:39	2014-05-01 07:07:24	2014-05-01 07:19:24	2014-05-01 06:22:00	1900-01-01 00:45:24	-4.75	-4.75	0.0203207	0.0101062	0.0201153	1	0	0.979885
CDG4785	ZGGGAR06	2014-05-02 07:27:18	2014-05-02 07:37:54	2014-05-02 07:03:19	2014-05-02 07:19:00	2014-05-02 06:45:00	1900-01-01 00:18:19	23.9833	18.9	0.99963	0.99436	0.00563827	1	1	0.0197107
CSN3576	ZGGGAR06	2014-05-03 07:08:09	2014-05-03 07:18:41	2014-05-03 07:02:36	2014-05-03 07:11:34	2014-05-03 05:27:00	1900-01-01 01:35:36	5.55	7.11667	0.458675	0.545502	0.208467	2	0	0.97436
CSC8918	ZGGGAR06	2014-05-03 07:06:39	2014-05-03 07:18:39	2014-05-03 07:09:11	2014-05-03 07:21:11	2014-05-03 06:26:00	1900-01-01 00:43:11	-2.53333	-2.53333	0.0516638	0.0309358	0.0500656	2	2	0.000111134
CSC8918	ZGGGAR06	2014-05-04 07:12:39	2014-05-04 07:24:39	2014-05-04 07:09:04	2014-05-04 07:21:04	2014-05-04 06:32:00	1900-01-01 00:37:04	3.58333	3.58333	0.31745	0.270525	0.231571	2	1	0.0251244
CSC8918	ZGGGAR06	2014-05-05 07:06:39	2014-05-05 07:18:39	2014-05-05 07:08:13	2014-05-05 07:20:13	2014-05-05 06:26:00	1900-01-01 00:42:13	-1.56667	-1.56667	0.0740128	0.0475864	0.0704908	3	0	0.771238
CSC8918	ZGGGAR06	2014-05-06 07:07:39	2014-05-06 07:19:39	2014-05-06 07:06:31	2014-05-06 07:18:31	2014-05-06 06:27:00	1900-01-01 00:39:31	1.13333	1.13333	0.174352	0.132574	0.151237	3	3	2.31678e-05
GCR6545	ZGGGAR06	2014-05-07 07:13:18	2014-05-07 07:22:02	2014-05-07 07:08:00	2014-05-07 07:14:55	2014-05-07 06:10:00	1900-01-01 00:58:00	5.3	7.11667	0.44001	0.545502	0.199984	3	1	0.223008
CSC8918	ZGGGAR06	2014-05-08 07:15:39	2014-05-08 07:27:39	2014-05-08 07:11:22	2014-05-08 07:23:22	2014-05-08 06:35:00	1900-01-01 00:36:22	4.28333	4.28333	0.365887	0.320075	0.248775	3	2	0.00532557
CSN3576	ZGGGAR06	2014-05-10 07:11:09	2014-05-10 07:21:41	2014-05-10 07:02:58	2014-05-10 07:11:38	2014-05-10 05:30:00	1900-01-01 01:32:58	8.18333	10.05	0.65287	0.7632	0.1546	4	0	0.732626
CSC8918	ZGGGAR06	2014-05-10 07:22:39	2014-05-10 07:34:39	2014-05-10 07:12:56	2014-05-10 07:24:56	2014-05-10 06:42:00	1900-01-01 00:30:56	9.71667	9.71667	0.752504	0.741568	0.194471	4	4	1.15991e-06
CSC8918	ZGGGAR06	2014-05-12 07:16:39	2014-05-12 07:28:39	2014-05-12 07:06:21	2014-05-12 07:18:21	2014-05-12 06:36:00	1900-01-01 00:30:21	10.3	10.3	0.785952	0.778747	0.173894	4	1	0.250456
CSC8918	ZGGGAR06	2014-05-13 07:16:39	2014-05-13 07:28:39	2014-05-13 07:04:59	2014-05-13 07:16:59	2014-05-13 06:36:00	1900-01-01 00:28:59	11.6667	11.6667	0.853213	0.852818	0.125578	4	2	0.016224
CXA8103	ZGGGAR06	2014-05-14 07:03:07	2014-05-14 07:13:43	2014-05-14 07:00:50	2014-05-14 07:10:09	2014-05-14 06:21:00	1900-01-01 00:39:50	2.28333	3.56667	0.235724	0.269394	0.172221	4	3	0.000288636
CSC8918	ZGGGAR06	2014-05-15 07:13:39	2014-05-15 07:25:39	2014-05-15 07:04:36	2014-05-15 07:16:36	2014-05-15 06:33:00	1900-01-01 00:31:36	9.05	9.05	0.711101	0.695427	0.216582	5	0	0.562971
CSN3576	ZGGGAR06	2014-05-15 07:21:09	2014-05-15 07:31:41	2014-05-15 07:13:50	2014-05-15 07:22:36	2014-05-15 05:40:00	1900-01-01 01:33:50	7.31667	9.08333	0.590783	0.697819	0.178523	5	5	2.68602e-07
CSC8918	ZGGGAR06	2014-05-17 07:10:39	2014-05-17 07:22:39	2014-05-17 07:08:03	2014-05-17 07:20:03	2014-05-17 06:30:00	1900-01-01 00:38:03	2.6	2.6	0.254506	0.208068	0.201551	5	1	0.362113
CSC8918	ZGGGAR06	2014-05-20 07:10:39	2014-05-20 07:22:39	2014-05-20 07:01:55	2014-05-20 07:13:55	2014-05-20 06:30:00	1900-01-01 00:31:55	8.73333	8.73333	0.690354	0.672299	0.22623	5	2	0.0704654
CDG4785	ZGGGAR06	2014-05-20 07:19:18	2014-05-20 07:29:54	2014-05-20 07:11:23	2014-05-20 07:21:41	2014-05-20 06:37:00	1900-01-01 00:34:23	7.91667	8.21667	0.634113	0.633139	0.232632	5	3	0.00397881
CSC8918	ZGGGAR06	2014-05-21 07:14:39	2014-05-21 07:26:39	2014-05-21 07:09:16	2014-05-21 07:21:16	2014-05-21 06:34:00	1900-01-01 00:35:16	5.38333	5.38333	0.446219	0.404539	0.265706	5	4	6.77311e-05
CSC8918	ZGGGAR06	2014-05-24 07:07:39	2014-05-24 07:19:39	2014-05-24 07:02:00	2014-05-24 07:14:00	2014-05-24 06:27:00	1900-01-01 00:35:00	5.65	5.65	0.466168	0.425886	0.267634	6	0	0.523286
CSN3576	ZGGGAR06	2014-05-24 07:15:09	2014-05-24 07:25:41	2014-05-24 07:03:32	2014-05-24 07:11:47	2014-05-24 05:34:00	1900-01-01 01:29:32	11.6167	13.9	0.851034	0.934119	0.0560673	6	6	1.89339e-08
CSN3576	ZGGGAR06	2014-05-25 07:07:21	2014-05-25 07:17:53	2014-05-25 07:01:36	2014-05-25 07:10:34	2014-05-25 05:26:00	1900-01-01 01:35:36	5.75	7.31667	0.473674	0.561736	0.207594	6	1	0.376271
CSN3875	ZGGGAR06	2014-05-28 07:09:43	2014-05-28 07:20:19	2014-05-28 07:05:36	2014-05-28 07:13:53	2014-05-28 06:28:00	1900-01-01 00:37:36	4.11667	6.43333	0.354123	0.489625	0.180735	6	2	0.0910238
CSN6325	ZGGGAR06	2014-05-28 07:13:41	2014-05-28 07:24:13	2014-05-28 07:08:38	2014-05-28 07:17:32	2014-05-28 05:44:00	1900-01-01 01:24:38	5.05	6.68333	0.421478	0.510102	0.206481	6	3	0.00866549
CSC8918	ZGGGAR06	2014-05-29 07:19:39	2014-05-29 07:31:39	2014-05-29 07:12:40	2014-05-29 07:23:32	2014-05-29 06:39:00	1900-01-01 00:33:40	6.98333	8.11667	0.566184	0.625381	0.212103	6	4	0.000343426
CSC8918	ZGGGAR06	2014-05-30 07:10:39	2014-05-30 07:22:39	2014-05-30 07:03:14	2014-05-30 07:15:14	2014-05-30 06:30:00	1900-01-01 00:33:14	7.41667	7.41667	0.598098	0.569816	0.257292	6	5	5.02408e-06
								5.29919	4.86778				7	0	0.444146
													7	7	2.86352e-09
													7	1	0.398505
													7	2	0.134164
													7	3	0.0211211
													7	4	0.00160203
													7	5	5.6203e-05
													7	6	7.75899e-07
													8	0	0.355324
													8	8	5.72656e-10
													8	1	0.407633
													8	2	0.187028
													8	3	0.0437278
													8	4	0.00550554
													8	5	0.000365344
													8	6	1.18604e-05
													8	7	1.57458e-07
													9	0	0.266928
													9	9	1.42463e-10
													9	1	0.39462
													9	2	0.241909
													9	3	0.0793774
													9	4	0.0150143
													9	5	0.0016441
													9	6	9.97984e-05
													9	7	3.06887e-06
													9	8	3.96019e-08
													10	0	0.225661
													10	10	2.20248e-11
													10	1	0.374879
													10	2	0.265518
													10	3	0.104505
													10	4	0.0249648
													10	5	0.00371113
													10	6	0.000338547
													10	7	1.80233e-05
													10	8	5.07926e-07
													10	9	6.24289e-09
													11	0	0.181776
													11	11	4.28318e-12
													11	1	0.34586
													11	2	0.286785
													11	3	0.135817
													11	4	0.0404331
													11	5	0.00784437
													11	6	0.000994418
													11	7	8.03559e-05
													11	8	3.91415e-06
													11	9	1.03806e-07
													11	10	1.2318e-09
													12	0	0.150167
													12	12	7.44822e-13
													12	1	0.317327
													12	2	0.297058
													12	3	0.16207
													12	4	0.0570198
													12	5	0.0135114
													12	6	0.00218559
													12	7	0.000239306
													12	8	1.7207e-05
													12	9	7.66404e-07
													12	10	1.90689e-08
													12	11	2.17742e-10
													13	0	0.131309
													13	13	9.35328e-14
													13	1	0.296335
													13	2	0.299603
													13	3	0.179021
													13	4	0.0702117
													13	5	0.018975
													13	6	0.00360785
													13	7	0.000483715
													13	8	4.50976e-05
													13	9	2.83097e-06
													13	10	1.12917e-07
													13	11	2.58502e-09
													13	12	2.79948e-11
													14	0	0.108695
													14	14	1.61083e-14
													14	1	0.267914
													14	2	0.299041
													14	3	0.199788
													14	4	0.088951
													14	5	0.0277991
													14	6	0.00625441
													14	7	0.00102176
													14	8	0.000120637
													14	9	1.01102e-05
													14	10	5.81023e-07
													14	11	2.15866e-08
													14	12	4.68369e-10
													14	13	4.89873e-12
													15	0	0.0851535
													15	15	3.48878e-15
													15	1	0.23343
													15	2	0.292299
													15	3	0.221284
													15	4	0.112956
													15	5	0.0410435
													15	6	0.0109206
													15	7	0.00215505
													15	8	0.000315803
													15	9	3.40483e-05
													15	10	2.64487e-06
													15	11	1.4275e-07
													15	12	5.0422e-09
													15	13	1.05278e-10
													15	14	1.0736e-12
													16	0	0.0699516
													16	16	6.22828e-16
													16	1	0.206959
													16	2	0.28179
													16	3	0.233962
													16	4	0.132295
													16	5	0.0538816
													16	6	0.0162982
													16	7	0.00371991
													16	8	0.000644153
													16	9	8.43481e-05
													16	10	8.25111e-06
													16	11	5.89437e-07
													16	12	2.96263e-08
													16	13	9.86633e-10
													16	14	1.96765e-11
													16	15	1.94528e-13
													17	0	0.0558528
													17	17	1.25532e-16
													17	1	0.179345
													17	2	0.266708
													17	3	0.243602
													17	4	0.152786
													17	5	0.069686
													17	6	0.0238732
													17	7	0.00625509
													17	8	0.00126407
													17	9	0.000197177
													17	10	2.35886e-05
													17	11	2.13366e-06
													17	12	1.42457e-07
													17	13	6.759e-09
													17	14	2.14568e-10
													17	15	4.12115e-12
													17	16	3.97046e-14
													18	0	0.0432172
													18	18	2.83991e-17
													18	1	0.151408
													18	2	0.246944
													18	3	0.248829
													18	4	0.173332
													18	5	0.0884858
													18	6	0.0342374
													18	7	0.0102408
													18	8	0.00239319
													18	9	0.000438542
													18	10	6.28596e-05
													18	11	6.9874e-06
													18	12	5.92926e-07
													18	13	3.74579e-08
													18	14	1.69512e-09
													18	15	5.17305e-11
													18	16	9.63049e-13
													18	17	9.07951e-15
													19	0	0.0331635
													19	19	6.60652e-18
													19	1	0.126239
													19	2	0.224719
													19	3	0.24839
													19	4	0.190895
													19	5	0.108224
													19	6	0.0468573
													19	7	0.0158232
													19	8	0.0042188
													19	9	0.000893255
													19	10	0.000150255
													19	11	1.9985e-05
													19	12	2.08048e-06
													19	13	1.66677e-07
													19	14	1.00147e-08
													19	15	4.34034e-10
													19	16	1.27732e-11
													19	17	2.31003e-13
													19	18	2.13397e-15
													20	0	0.0243518
													20	20	1.75539e-18
													20	1	0.101508
													20	2	0.198552
													20	3	0.242101
													20	4	0.206172
													20	5	0.13019
													20	6	0.0631627
													20	7	0.0240692
													20	8	0.00730216
													20	9	0.00177687
													20	10	0.000347674
													20	11	5.45985e-05
													20	12	6.83782e-06
													20	13	6.75186e-07
													20	14	5.16409e-08
													20	15	2.97967e-09
													20	16	1.24705e-10
													20	17	3.56353e-12
													20	18	6.29458e-14
													20	19	5.7186e-16
													21	0	0.0178344
													21	21	4.69802e-19
													21	1	0.0808586
													21	2	0.17258
													21	3	0.230446
													21	4	0.215788
													21	5	0.150525
													21	6	0.0811015
													21	7	0.0345319
													21	8	0.0117896
													21	9	0.00325563
													21	10	0.000730176
													21	11	0.000133036
													21	12	1.96202e-05
													21	13	2.32452e-06
													21	14	2.18523e-07
													21	15	1.6003e-08
													21	16	8.88789e-10
													21	17	3.5985e-11
													21	18	9.9982e-13
													21	19	1.72652e-14
													21	20	1.54335e-16
													22	0	0.0168345
													22	22	2.63405e-20
													22	1	0.077325
													22	2	0.167437
													22	3	0.227201
													22	4	0.216609
													22	5	0.154184
													22	6	0.0849939
													22	7	0.0371429
													22	8	0.0130647
													22	9	0.0037341
													22	10	0.000871771
													22	11	0.000166516
													22	12	2.59791e-05
													22	13	3.29424e-06
													22	14	3.366e-07
													22	15	2.73578e-08
													22	16	1.7362e-09
													22	17	8.37994e-11
													22	18	2.96134e-12
													22	19	7.23545e-14
													22	20	1.1137e-15
													22	21	9.09659e-18
													23	0	0.0133397
													23	23	5.46814e-21
													23	1	0.0647676
													23	2	0.148731
													23	3	0.214795
													23	4	0.218808
													23	5	0.167143
													23	6	0.0993574
													23	7	0.0470765
													23	8	0.0180632
													23	9	0.00567107
													23	10	0.00146597
													23	11	0.000312922
													23	12	5.51536e-05
													23	13	8.00348e-06
													23	14	9.50588e-07
													23	15	9.15547e-08
													23	16	7.05509e-09
													23	17	4.26829e-10
													23	18	1.97428e-11
													23	19	6.72091e-13
													23	20	1.59029e-14
													23	21	2.38405e-16
													23	22	1.90927e-18
													24	0	0.0109288
													24	24	9.88286e-22
													24	1	0.0554727
													24	2	0.133556
													24	3	0.202855
													24	4	0.218083
													24	5	0.176481
													24	6	0.111609
													24	7	0.0565255
													24	8	0.0233069
													24	9	0.00791077
													24	10	0.00222598
													24	11	0.00052132
													24	12	0.000101742
													24	13	1.65252e-05
													24	14	2.2253e-06
													24	15	2.46812e-07
													24	16	2.23272e-08
													24	17	1.62479e-09
													24	18	9.33177e-11
													24	19	4.11885e-12
													24	20	1.34499e-13
													24	21	3.06953e-15
													24	22	4.46524e-17
													24	23	3.49553e-19
													25	0	0.00867219
													25	25	2.04063e-22
													25	1	0.0462752
													25	2	0.117433
													25	3	0.188546
													25	4	0.214938
													25	5	0.185071
													25	6	0.125004
													25	7	0.0678992
													25	8	0.0301659
													25	9	0.0110898
													25	10	0.00339978
													25	11	0.000873301
													25	12	0.000188377
													25	13	3.41208e-05
													25	14	5.17796e-06
													25	15	6.55332e-07
													25	16	6.86792e-08
													25	17	5.89944e-09
													25	18	4.09538e-10
													25	19	2.25367e-11
													25	20	9.57193e-13
													25	21	3.02073e-14
													25	22	6.69232e-16
													25	23	9.49727e-18
													25	24	7.29603e-20
													26	0	0.00683279
													26	26	4.32823e-23
													26	1	0.0382995
													26	2	0.10234
													26	3	0.173462
													26	4	0.20934
													26	5	0.191406
													26	6	0.137744
													26	7	0.0800112
													26	8	0.0381693
													26	9	0.0151359
													26	10	0.00503086
													26	11	0.00140918
													26	12	0.000333651
													26	13	6.68389e-05
													26	14	1.13168e-05
													26	15	1.6146e-06
													26	16	1.9311e-07
													26	17	1.92152e-08
													26	18	1.57396e-09
													26	19	1.04621e-10
													26	20	5.53429e-12
													26	21	2.26824e-13
													26	22	6.93436e-15
													26	23	1.49429e-16
													26	24	2.07189e-18
													26	25	1.56359e-20
													27	0	0.00507477
													27	27	1.11362e-23
													27	1	0.0302034
													27	2	0.085863
													27	3	0.155163
													27	4	0.200109
													27	5	0.19602
													27	6	0.151551
													27	7	0.0948654
													27	8	0.0489349
													27	9	0.0210622
													27	10	0.0076308
													27	11	0.00234101
													27	12	0.000610375
													27	13	0.000135488
													27	14	2.56022e-05
													27	15	4.1109e-06
													27	16	5.58847e-07
													27	17	6.3957e-08
													27	18	6.11292e-09
													27	19	4.82671e-10
													27	20	3.10285e-11
													27	21	1.59239e-12
													27	22	6.35102e-14
													27	23	1.89514e-15
													27	24	3.99857e-17
													27	25	5.44693e-19
													27	26	4.05514e-21
													#N/A	#N/A	#N/A
													#N/A	#N/A	#N/A
													#N/A	#N/A	#N/A
													#N/A	#N/A	#N/A
													#N/A	#N/A	#N/A
													#N/A	#N/A	#N/A
													#N/A	#N/A	#N/A
													#N/A	#N/A	#N/A
													#N/A	#N/A	#N/A
													#N/A	#N/A	#N/A
													#N/A	#N/A	#N/A
													#N/A	#N/A	#N/A
													#N/A	#N/A	#N/A
													#N/A	#N/A	#N/A
													#N/A	#N/A	#N/A
													#N/A	#N/A	#N/A
													#N/A	#N/A	#N/A
													#N/A	#N/A	#N/A
													#N/A	#N/A	#N/A
													#N/A	#N/A	#N/A
													#N/A	#N/A	#N/A
													#N/A	#N/A	#N/A
													#N/A	#N/A	#N/A
													#N/A	#N/A	#N/A
													#N/A	#N/A	#N/A
													#N/A	#N/A	#N/A
													#N/A	#N/A	#N/A
													#N/A	#N/A	#N/A
													#N/A	#N/A	#N/A
													#N/A	#N/A	#N/A
													#N/A	#N/A	#N/A
													#N/A	#N/A	#N/A
													#N/A	#N/A	#N/A
													#N/A	#N/A	#N/A
													#N/A	#N/A	#N/A
													#N/A	#N/A	#N/A
													#N/A	#N/A	#N/A
													#N/A	#N/A	#N/A
													#N/A	#N/A	#N/A
													#N/A	#N/A	#N/A
													#N/A	#N/A	#N/A
													#N/A	#N/A	#N/A
													#N/A	#N/A	#N/A
													#N/A	#N/A	#N/A
													#N/A	#N/A	#N/A
													#N/A	#N/A	#N/A
													#N/A	#N/A	#N/A
													#N/A	#N/A	#N/A
													#N/A	#N/A	#N/A
													#N/A	#N/A	#N/A
													#N/A	#N/A	#N/A
													#N/A	#N/A	#N/A
													#N/A	#N/A	#N/A
													#N/A	#N/A	#N/A
													#N/A	#N/A	#N/A
													#N/A	#N/A	#N/A
													#N/A	#N/A	#N/A
													#N/A	#N/A	#N/A
													#N/A	#N/A	#N/A
													#N/A	#N/A	#N/A
													#N/A	#N/A	#N/A
													#N/A	#N/A	#N/A
													#N/A	#N/A	#N/A
													#N/A	#N/A	#N/A
													#N/A	#N/A	#N/A
													#N/A	#N/A	#N/A
													#N/A	#N/A	#N/A
													#N/A	#N/A	#N/A
													#N/A	#N/A	#N/A
													#N/A	#N/A	#N/A
													#N/A	#N/A	#N/A
													#N/A	#N/A	#N/A
													#N/A	#N/A	#N/A
													#N/A	#N/A	#N/A
													#N/A	#N/A	#N/A
													#N/A	#N/A	#N/A
													#N/A	#N/A	#N/A
													#N/A	#N/A	#N/A
													#N/A	#N/A	#N/A
													#N/A	#N/A	#N/A
													#N/A	#N/A	#N/A
													#N/A	#N/A	#N/A
													#N/A	#N/A	#N/A
													#N/A	#N/A	#N/A
													#N/A	#N/A	#N/A
													#N/A	#N/A	#N/A
													#N/A	#N/A	#N/A
													#N/A	#N/A	#N/A
													#N/A	#N/A	#N/A
													#N/A	#N/A	#N/A
													#N/A	#N/A	#N/A
													#N/A	#N/A	#N/A
													#N/A	#N/A	#N/A
													#N/A	#N/A	#N/A
													#N/A	#N/A	#N/A
													#N/A	#N/A	#N/A
													#N/A	#N/A	#N/A
													#N/A	#N/A	#N/A
													#N/A	#N/A	#N/A
													#N/A	#N/A	#N/A
													#N/A	#N/A	#N/A
													#N/A	#N/A	#N/A
													#N/A	#N/A	#N/A
													#N/A	#N/A	#N/A
													#N/A	#N/A	#N/A
													#N/A	#N/A	#N/A
													#N/A	#N/A	#N/A
													#N/A	#N/A	#N/A
													#N/A	#N/A	#N/A
													#N/A	#N/A	#N/A
													#N/A	#N/A	#N/A
													#N/A	#N/A	#N/A
													#N/A	#N/A	#N/A
													#N/A	#N/A	#N/A
													#N/A	#N/A	#N/A
													#N/A	#N/A	#N/A
													#N/A	#N/A	#N/A
													#N/A	#N/A	#N/A
													#N/A	#N/A	#N/A
													#N/A	#N/A	#N/A
													#N/A	#N/A	#N/A
													#N/A	#N/A	#N/A
													#N/A	#N/A	#N/A
													#N/A	#N/A	#N/A
													#N/A	#N/A	#N/A
													#N/A	#N/A	#N/A
													#N/A	#N/A	#N/A
													#N/A	#N/A	#N/A
													#N/A	#N/A	#N/A
													#N/A	#N/A	#N/A
													#N/A	#N/A	#N/A
													#N/A	#N/A	#N/A
													#N/A	#N/A	#N/A
													#N/A	#N/A	#N/A
													#N/A	#N/A	#N/A
													#N/A	#N/A	#N/A
													#N/A	#N/A	#N/A
													#N/A	#N/A	#N/A
													#N/A	#N/A	#N/A
													#N/A	#N/A	#N/A
													#N/A	#N/A	#N/A
													#N/A	#N/A	#N/A
													#N/A	#N/A	#N/A
													#N/A	#N/A	#N/A
													#N/A	#N/A	#N/A
													#N/A	#N/A	#N/A
													#N/A	#N/A	#N/A
													#N/A	#N/A	#N/A
													#N/A	#N/A	#N/A
													#N/A	#N/A	#N/A
													#N/A	#N/A	#N/A
													#N/A	#N/A	#N/A
													#N/A	#N/A	#N/A
													#N/A	#N/A	#N/A
													#N/A	#N/A	#N/A
													#N/A	#N/A	#N/A
													#N/A	#N/A	#N/A
													#N/A	#N/A	#N/A
													#N/A	#N/A	#N/A
													#N/A	#N/A	#N/A
													#N/A	#N/A	#N/A
													#N/A	#N/A	#N/A
													#N/A	#N/A	#N/A
													#N/A	#N/A	#N/A
													#N/A	#N/A	#N/A
													#N/A	#N/A	#N/A
													#N/A	#N/A	#N/A
													#N/A	#N/A	#N/A
													#N/A	#N/A	#N/A
													#N/A	#N/A	#N/A
													#N/A	#N/A	#N/A
													#N/A	#N/A	#N/A
													#N/A	#N/A	#N/A
													#N/A	#N/A	#N/A
													#N/A	#N/A	#N/A
													#N/A	#N/A	#N/A
													#N/A	#N/A	#N/A
													#N/A	#N/A	#N/A
													#N/A	#N/A	#N/A
													#N/A	#N/A	#N/A
													#N/A	#N/A	#N/A
													#N/A	#N/A	#N/A
													#N/A	#N/A	#N/A
													#N/A	#N/A	#N/A
													#N/A	#N/A	#N/A
													#N/A	#N/A	#N/A
													#N/A	#N/A	#N/A
													#N/A	#N/A	#N/A
													#N/A	#N/A	#N/A
													#N/A	#N/A	#N/A
													#N/A	#N/A	#N/A
													#N/A	#N/A	#N/A
													#N/A	#N/A	#N/A
													#N/A	#N/A	#N/A
													#N/A	#N/A	#N/A
													#N/A	#N/A	#N/A
													#N/A	#N/A	#N/A
													#N/A	#N/A	#N/A
													#N/A	#N/A	#N/A
													#N/A	#N/A	#N/A
													#N/A	#N/A	#N/A
													#N/A	#N/A	#N/A
													#N/A	#N/A	#N/A
													#N/A	#N/A	#N/A
													#N/A	#N/A	#N/A
													#N/A	#N/A	#N/A
													#N/A	#N/A	#N/A
													#N/A	#N/A	#N/A
													#N/A	#N/A	#N/A
													#N/A	#N/A	#N/A
													#N/A	#N/A	#N/A
													#N/A	#N/A	#N/A
													#N/A	#N/A	#N/A
													#N/A	#N/A	#N/A
													#N/A	#N/A	#N/A
													#N/A	#N/A	#N/A
													#N/A	#N/A	#N/A
													#N/A	#N/A	#N/A
													#N/A	#N/A	#N/A
													#N/A	#N/A	#N/A
													#N/A	#N/A	#N/A
													#N/A	#N/A	#N/A
													#N/A	#N/A	#N/A
													#N/A	#N/A	#N/A
													#N/A	#N/A	#N/A
													#N/A	#N/A	#N/A
													#N/A	#N/A	#N/A
													#N/A	#N/A	#N/A
													#N/A	#N/A	#N/A
													#N/A	#N/A	#N/A
													#N/A	#N/A	#N/A
													#N/A	#N/A	#N/A
													#N/A	#N/A	#N/A
													#N/A	#N/A	#N/A
													#N/A	#N/A	#N/A
													#N/A	#N/A	#N/A
													#N/A	#N/A	#N/A
													#N/A	#N/A	#N/A
													#N/A	#N/A	#N/A
													#N/A	#N/A	#N/A
													#N/A	#N/A	#N/A
													#N/A	#N/A	#N/A
													#N/A	#N/A	#N/A
													#N/A	#N/A	#N/A
													#N/A	#N/A	#N/A
													#N/A	#N/A	#N/A
													#N/A	#N/A	#N/A
													#N/A	#N/A	#N/A
													#N/A	#N/A	#N/A
													#N/A	#N/A	#N/A
													#N/A	#N/A	#N/A
													#N/A	#N/A	#N/A
													#N/A	#N/A	#N/A
													#N/A	#N/A	#N/A
													#N/A	#N/A	#N/A
													#N/A	#N/A	#N/A
													#N/A	#N/A	#N/A
													#N/A	#N/A	#N/A
													#N/A	#N/A	#N/A
													#N/A	#N/A	#N/A
													#N/A	#N/A	#N/A
													#N/A	#N/A	#N/A
													#N/A	#N/A	#N/A
													#N/A	#N/A	#N/A
													#N/A	#N/A	#N/A
													#N/A	#N/A	#N/A
													#N/A	#N/A	#N/A
													#N/A	#N/A	#N/A
													#N/A	#N/A	#N/A
													#N/A	#N/A	#N/A
													#N/A	#N/A	#N/A
													#N/A	#N/A	#N/A
													#N/A	#N/A	#N/A
													#N/A	#N/A	#N/A
													#N/A	#N/A	#N/A
													#N/A	#N/A	#N/A
													#N/A	#N/A	#N/A
													#N/A	#N/A	#N/A
													#N/A	#N/A	#N/A
													#N/A	#N/A	#N/A
													#N/A	#N/A	#N/A
													#N/A	#N/A	#N/A
													#N/A	#N/A	#N/A
													#N/A	#N/A	#N/A
													#N/A	#N/A	#N/A
													#N/A	#N/A	#N/A
													#N/A	#N/A	#N/A
													#N/A	#N/A	#N/A
													#N/A	#N/A	#N/A
													#N/A	#N/A	#N/A
													#N/A	#N/A	#N/A
													#N/A	#N/A	#N/A
													#N/A	#N/A	#N/A
													#N/A	#N/A	#N/A
													#N/A	#N/A	#N/A
													#N/A	#N/A	#N/A
													#N/A	#N/A	#N/A
													#N/A	#N/A	#N/A
													#N/A	#N/A	#N/A
													#N/A	#N/A	#N/A
													#N/A	#N/A	#N/A
													#N/A	#N/A	#N/A
													#N/A	#N/A	#N/A
													#N/A	#N/A	#N/A
													#N/A	#N/A	#N/A
													#N/A	#N/A	#N/A
													#N/A	#N/A	#N/A
													#N/A	#N/A	#N/A
													#N/A	#N/A	#N/A
													#N/A	#N/A	#N/A
													#N/A	#N/A	#N/A
													#N/A	#N/A	#N/A
													#N/A	#N/A	#N/A
													#N/A	#N/A	#N/A
													#N/A	#N/A	#N/A
													#N/A	#N/A	#N/A
													#N/A	#N/A	#N/A
													#N/A	#N/A	#N/A
													#N/A	#N/A	#N/A
													#N/A	#N/A	#N/A
													#N/A	#N/A	#N/A
													#N/A	#N/A	#N/A
													#N/A	#N/A	#N/A
													#N/A	#N/A	#N/A
													#N/A	#N/A	#N/A
													#N/A	#N/A	#N/A
													#N/A	#N/A	#N/A
													#N/A	#N/A	#N/A
													#N/A	#N/A	#N/A
													#N/A	#N/A	#N/A
													#N/A	#N/A	#N/A
													#N/A	#N/A	#N/A
													#N/A	#N/A	#N/A
													#N/A	#N/A	#N/A
													#N/A	#N/A	#N/A
													#N/A	#N/A	#N/A
													#N/A	#N/A	#N/A
													#N/A	#N/A	#N/A
													#N/A	#N/A	#N/A
													#N/A	#N/A	#N/A
													#N/A	#N/A	#N/A
													#N/A	#N/A	#N/A
													#N/A	#N/A	#N/A
													#N/A	#N/A	#N/A
													#N/A	#N/A	#N/A
													#N/A	#N/A	#N/A
													#N/A	#N/A	#N/A
													#N/A	#N/A	#N/A
													#N/A	#N/A	#N/A
													#N/A	#N/A	#N/A
													#N/A	#N/A	#N/A
													#N/A	#N/A	#N/A
													#N/A	#N/A	#N/A
													#N/A	#N/A	#N/A
													#N/A	#N/A	#N/A
													#N/A	#N/A	#N/A
													#N/A	#N/A	#N/A
													#N/A	#N/A	#N/A
													#N/A	#N/A	#N/A
													#N/A	#N/A	#N/A
													#N/A	#N/A	#N/A
													#N/A	#N/A	#N/A
													#N/A	#N/A	#N/A
													#N/A	#N/A	#N/A
													#N/A	#N/A	#N/A
													#N/A	#N/A	#N/A
													#N/A	#N/A	#N/A
													#N/A	#N/A	#N/A
													#N/A	#N/A	#N/A
													#N/A	#N/A	#N/A
													#N/A	#N/A	#N/A
													#N/A	#N/A	#N/A
													#N/A	#N/A	#N/A
													#N/A	#N/A	#N/A
													#N/A	#N/A	#N/A
													#N/A	#N/A	#N/A
													#N/A	#N/A	#N/A
													#N/A	#N/A	#N/A
													#N/A	#N/A	#N/A
													#N/A	#N/A	#N/A
													#N/A	#N/A	#N/A
													#N/A	#N/A	#N/A
													#N/A	#N/A	#N/A
													#N/A	#N/A	#N/A
													#N/A	#N/A	#N/A
													#N/A	#N/A	#N/A
													#N/A	#N/A	#N/A
													#N/A	#N/A	#N/A
													#N/A	#N/A	#N/A
													#N/A	#N/A	#N/A
													#N/A	#N/A	#N/A
													#N/A	#N/A	#N/A
													#N/A	#N/A	#N/A
													#N/A	#N/A	#N/A
													#N/A	#N/A	#N/A
													#N/A	#N/A	#N/A
													#N/A	#N/A	#N/A
													#N/A	#N/A	#N/A
													#N/A	#N/A	#N/A
													#N/A	#N/A	#N/A
													#N/A	#N/A	#N/A
													#N/A	#N/A	#N/A
													#N/A	#N/A	#N/A
													#N/A	#N/A	#N/A
													#N/A	#N/A	#N/A
													#N/A	#N/A	#N/A
													#N/A	#N/A	#N/A
													#N/A	#N/A	#N/A
													#N/A	#N/A	#N/A
													#N/A	#N/A	#N/A
													#N/A	#N/A	#N/A
													#N/A	#N/A	#N/A
													#N/A	#N/A	#N/A
													#N/A	#N/A	#N/A
													#N/A	#N/A	#N/A
													#N/A	#N/A	#N/A
													#N/A	#N/A	#N/A
													#N/A	#N/A	#N/A
													#N/A	#N/A	#N/A
													#N/A	#N/A	#N/A
													#N/A	#N/A	#N/A
													#N/A	#N/A	#N/A
													#N/A	#N/A	#N/A
													#N/A	#N/A	#N/A
													#N/A	#N/A	#N/A
													#N/A	#N/A	#N/A
													#N/A	#N/A	#N/A
													#N/A	#N/A	#N/A
													#N/A	#N/A	#N/A
													#N/A	#N/A	#N/A
													#N/A	#N/A	#N/A
													#N/A	#N/A	#N/A
													#N/A	#N/A	#N/A
													#N/A	#N/A	#N/A
													#N/A	#N/A	#N/A
													#N/A	#N/A	#N/A
													#N/A	#N/A	#N/A
													#N/A	#N/A	#N/A
													#N/A	#N/A	#N/A
													#N/A	#N/A	#N/A
													#N/A	#N/A	#N/A
													#N/A	#N/A	#N/A
													#N/A	#N/A	#N/A
													#N/A	#N/A	#N/A
													#N/A	#N/A	#N/A
													#N/A	#N/A	#N/A
													#N/A	#N/A	#N/A
													#N/A	#N/A	#N/A
													#N/A	#N/A	#N/A
													#N/A	#N/A	#N/A
													#N/A	#N/A	#N/A
													#N/A	#N/A	#N/A
													#N/A	#N/A	#N/A
													#N/A	#N/A	#N/A
													#N/A	#N/A	#N/A
													#N/A	#N/A	#N/A
													#N/A	#N/A	#N/A
													#N/A	#N/A	#N/A
													#N/A	#N/A	#N/A
													#N/A	#N/A	#N/A
													#N/A	#N/A	#N/A
													#N/A	#N/A	#N/A
													#N/A	#N/A	#N/A
													#N/A	#N/A	#N/A
													#N/A	#N/A	#N/A
													#N/A	#N/A	#N/A
													#N/A	#N/A	#N/A
													#N/A	#N/A	#N/A
													#N/A	#N/A	#N/A
													#N/A	#N/A	#N/A
													#N/A	#N/A	#N/A
													#N/A	#N/A	#N/A
													#N/A	#N/A	#N/A
													#N/A	#N/A	#N/A
													#N/A	#N/A	#N/A
													#N/A	#N/A	#N/A
													#N/A	#N/A	#N/A
													#N/A	#N/A	#N/A
													#N/A	#N/A	#N/A
													#N/A	#N/A	#N/A
													#N/A	#N/A	#N/A
													#N/A	#N/A	#N/A
													#N/A	#N/A	#N/A
													#N/A	#N/A	#N/A
													#N/A	#N/A	#N/A
													#N/A	#N/A	#N/A
													#N/A	#N/A	#N/A
													#N/A	#N/A	#N/A
													#N/A	#N/A	#N/A
													#N/A	#N/A	#N/A
													#N/A	#N/A	#N/A
													#N/A	#N/A	#N/A
													#N/A	#N/A	#N/A
													#N/A	#N/A	#N/A
													#N/A	#N/A	#N/A
													#N/A	#N/A	#N/A
													#N/A	#N/A	#N/A
													#N/A	#N/A	#N/A
													#N/A	#N/A	#N/A
													#N/A	#N/A	#N/A
													#N/A	#N/A	#N/A
													#N/A	#N/A	#N/A
													#N/A	#N/A	#N/A
													#N/A	#N/A	#N/A
													#N/A	#N/A	#N/A
													#N/A	#N/A	#N/A
													#N/A	#N/A	#N/A
													#N/A	#N/A	#N/A
													#N/A	#N/A	#N/A
													#N/A	#N/A	#N/A
													#N/A	#N/A	#N/A
													#N/A	#N/A	#N/A
													#N/A	#N/A	#N/A
													#N/A	#N/A	#N/A
													#N/A	#N/A	#N/A
													#N/A	#N/A	#N/A
													#N/A	#N/A	#N/A
													#N/A	#N/A	#N/A
													#N/A	#N/A	#N/A
													#N/A	#N/A	#N/A
													#N/A	#N/A	#N/A
													#N/A	#N/A	#N/A
													#N/A	#N/A	#N/A
													#N/A	#N/A	#N/A
													#N/A	#N/A	#N/A
													#N/A	#N/A	#N/A
													#N/A	#N/A	#N/A
													#N/A	#N/A	#N/A
													#N/A	#N/A	#N/A
													#N/A	#N/A	#N/A
													#N/A	#N/A	#N/A
													#N/A	#N/A	#N/A
													#N/A	#N/A	#N/A
													#N/A	#N/A	#N/A
													#N/A	#N/A	#N/A
													#N/A	#N/A	#N/A
													#N/A	#N/A	#N/A
													#N/A	#N/A	#N/A
													#N/A	#N/A	#N/A
													#N/A	#N/A	#N/A
													#N/A	#N/A	#N/A
													#N/A	#N/A	#N/A
													#N/A	#N/A	#N/A
													#N/A	#N/A	#N/A
													#N/A	#N/A	#N/A
													#N/A	#N/A	#N/A
													#N/A	#N/A	#N/A
													#N/A	#N/A	#N/A
													#N/A	#N/A	#N/A
													#N/A	#N/A	#N/A
													#N/A	#N/A	#N/A
													#N/A	#N/A	#N/A
													#N/A	#N/A	#N/A
													#N/A	#N/A	#N/A
													#N/A	#N/A	#N/A
													#N/A	#N/A	#N/A
													#N/A	#N/A	#N/A
													#N/A	#N/A	#N/A
													#N/A	#N/A	#N/A
													#N/A	#N/A	#N/A
													#N/A	#N/A	#N/A
													#N/A	#N/A	#N/A
													#N/A	#N/A	#N/A
													#N/A	#N/A	#N/A
													#N/A	#N/A	#N/A
													#N/A	#N/A	#N/A
													#N/A	#N/A	#N/A
													#N/A	#N/A	#N/A
													#N/A	#N/A	#N/A
													#N/A	#N/A	#N/A
													#N/A	#N/A	#N/A
													#N/A	#N/A	#N/A
													#N/A	#N/A	#N/A
													#N/A	#N/A	#N/A
													#N/A	#N/A	#N/A
													#N/A	#N/A	#N/A
													#N/A	#N/A	#N/A
													#N/A	#N/A	#N/A
													#N/A	#N/A	#N/A
													#N/A	#N/A	#N/A
													#N/A	#N/A	#N/A
													#N/A	#N/A	#N/A
													#N/A	#N/A	#N/A
													#N/A	#N/A	#N/A
													#N/A	#N/A	#N/A
													#N/A	#N/A	#N/A
													#N/A	#N/A	#N/A
													#N/A	#N/A	#N/A
													#N/A	#N/A	#N/A
													#N/A	#N/A	#N/A
													#N/A	#N/A	#N/A
													#N/A	#N/A	#N/A
													#N/A	#N/A	#N/A
													#N/A	#N/A	#N/A
													#N/A	#N/A	#N/A
													#N/A	#N/A	#N/A
													#N/A	#N/A	#N/A
													#N/A	#N/A	#N/A
													#N/A	#N/A	#N/A
													#N/A	#N/A	#N/A
													#N/A	#N/A	#N/A
													#N/A	#N/A	#N/A
													#N/A	#N/A	#N/A
													#N/A	#N/A	#N/A
													#N/A	#N/A	#N/A
													#N/A	#N/A	#N/A
													#N/A	#N/A	#N/A
													#N/A	#N/A	#N/A
													#N/A	#N/A	#N/A
													#N/A	#N/A	#N/A
													#N/A	#N/A	#N/A
													#N/A	#N/A	#N/A
													#N/A	#N/A	#N/A
													#N/A	#N/A	#N/A
													#N/A	#N/A	#N/A
													#N/A	#N/A	#N/A
													#N/A	#N/A	#N/A
													#N/A	#N/A	#N/A
													#N/A	#N/A	#N/A
													#N/A	#N/A	#N/A
													#N/A	#N/A	#N/A
													#N/A	#N/A	#N/A
													#N/A	#N/A	#N/A
													#N/A	#N/A	#N/A
													#N/A	#N/A	#N/A
													#N/A	#N/A	#N/A
													#N/A	#N/A	#N/A
													#N/A	#N/A	#N/A
													#N/A	#N/A	#N/A
													#N/A	#N/A	#N/A
													#N/A	#N/A	#N/A
													#N/A	#N/A	#N/A
													#N/A	#N/A	#N/A
													#N/A	#N/A	#N/A
													#N/A	#N/A	#N/A
													#N/A	#N/A	#N/A
													#N/A	#N/A	#N/A
													#N/A	#N/A	#N/A
													#N/A	#N/A	#N/A
													#N/A	#N/A	#N/A
													#N/A	#N/A	#N/A
													#N/A	#N/A	#N/A
													#N/A	#N/A	#N/A
													#N/A	#N/A	#N/A
													#N/A	#N/A	#N/A
													#N/A	#N/A	#N/A
													#N/A	#N/A	#N/A
													#N/A	#N/A	#N/A
													#N/A	#N/A	#N/A
													#N/A	#N/A	#N/A
													#N/A	#N/A	#N/A
													#N/A	#N/A	#N/A
													#N/A	#N/A	#N/A
													#N/A	#N/A	#N/A
													#N/A	#N/A	#N/A
													#N/A	#N/A	#N/A
													#N/A	#N/A	#N/A
													#N/A	#N/A	#N/A
													#N/A	#N/A	#N/A
													#N/A	#N/A	#N/A
													#N/A	#N/A	#N/A
													#N/A	#N/A	#N/A
													#N/A	#N/A	#N/A
													#N/A	#N/A	#N/A
													#N/A	#N/A	#N/A
													#N/A	#N/A	#N/A
													#N/A	#N/A	#N/A
													#N/A	#N/A	#N/A
													#N/A	#N/A	#N/A
													#N/A	#N/A	#N/A
													#N/A	#N/A	#N/A
													#N/A	#N/A	#N/A
													#N/A	#N/A	#N/A
													#N/A	#N/A	#N/A
													#N/A	#N/A	#N/A
													#N/A	#N/A	#N/A
													#N/A	#N/A	#N/A
													#N/A	#N/A	#N/A
													#N/A	#N/A	#N/A
													#N/A	#N/A	#N/A
													#N/A	#N/A	#N/A
													#N/A	#N/A	#N/A
													#N/A	#N/A	#N/A
													#N/A	#N/A	#N/A
													#N/A	#N/A	#N/A
													#N/A	#N/A	#N/A
													#N/A	#N/A	#N/A
													#N/A	#N/A	#N/A
													#N/A	#N/A	#N/A
													#N/A	#N/A	#N/A
													#N/A	#N/A	#N/A
													#N/A	#N/A	#N/A
													#N/A	#N/A	#N/A
													#N/A	#N/A	#N/A
													#N/A	#N/A	#N/A
													#N/A	#N/A	#N/A
													#N/A	#N/A	#N/A
													#N/A	#N/A	#N/A
													#N/A	#N/A	#N/A
													#N/A	#N/A	#N/A
													#N/A	#N/A	#N/A
													#N/A	#N/A	#N/A
													#N/A	#N/A	#N/A
													#N/A	#N/A	#N/A
													#N/A	#N/A	#N/A
													#N/A	#N/A	#N/A
													#N/A	#N/A	#N/A
													#N/A	#N/A	#N/A
													#N/A	#N/A	#N/A
													#N/A	#N/A	#N/A
													#N/A	#N/A	#N/A
													#N/A	#N/A	#N/A
													#N/A	#N/A	#N/A
													#N/A	#N/A	#N/A
													#N/A	#N/A	#N/A
													#N/A	#N/A	#N/A
													#N/A	#N/A	#N/A
													#N/A	#N/A	#N/A
													#N/A	#N/A	#N/A
													#N/A	#N/A	#N/A
													#N/A	#N/A	#N/A
													#N/A	#N/A	#N/A
													#N/A	#N/A	#N/A
													#N/A	#N/A	#N/A
													#N/A	#N/A	#N/A
													#N/A	#N/A	#N/A
													#N/A	#N/A	#N/A
													#N/A	#N/A	#N/A
													#N/A	#N/A	#N/A
													#N/A	#N/A	#N/A
													#N/A	#N/A	#N/A
													#N/A	#N/A	#N/A
													#N/A	#N/A	#N/A
													#N/A	#N/A	#N/A
													#N/A	#N/A	#N/A
													#N/A	#N/A	#N/A
													#N/A	#N/A	#N/A
													#N/A	#N/A	#N/A
													#N/A	#N/A	#N/A
													#N/A	#N/A	#N/A
													#N/A	#N/A	#N/A
													#N/A	#N/A	#N/A
													#N/A	#N/A	#N/A
													#N/A	#N/A	#N/A
													#N/A	#N/A	#N/A
													#N/A	#N/A	#N/A
													#N/A	#N/A	#N/A
													#N/A	#N/A	#N/A
													#N/A	#N/A	#N/A
													#N/A	#N/A	#N/A
													#N/A	#N/A	#N/A
													#N/A	#N/A	#N/A
													#N/A	#N/A	#N/A
													#N/A	#N/A	#N/A
													#N/A	#N/A	#N/A
													#N/A	#N/A	#N/A
													#N/A	#N/A	#N/A
													#N/A	#N/A	#N/A
													#N/A	#N/A	#N/A
													#N/A	#N/A	#N/A
													#N/A	#N/A	#N/A
													#N/A	#N/A	#N/A
													#N/A	#N/A	#N/A
													#N/A	#N/A	#N/A
													#N/A	#N/A	#N/A
													#N/A	#N/A	#N/A
													#N/A	#N/A	#N/A
													#N/A	#N/A	#N/A
													#N/A	#N/A	#N/A
													#N/A	#N/A	#N/A
													#N/A	#N/A	#N/A
													#N/A	#N/A	#N/A
													#N/A	#N/A	#N/A
													#N/A	#N/A	#N/A
													#N/A	#N/A	#N/A
													#N/A	#N/A	#N/A
													#N/A	#N/A	#N/A
													#N/A	#N/A	#N/A
													#N/A	#N/A	#N/A
													#N/A	#N/A	#N/A
													#N/A	#N/A	#N/A
													#N/A	#N/A	#N/A
													#N/A	#N/A	#N/A
													#N/A	#N/A	#N/A
													#N/A	#N/A	#N/A
													#N/A	#N/A	#N/A
													#N/A	#N/A	#N/A
													#N/A	#N/A	#N/A
													#N/A	#N/A	#N/A
													#N/A	#N/A	#N/A
													#N/A	#N/A	#N/A
													#N/A	#N/A	#N/A
													#N/A	#N/A	#N/A
													#N/A	#N/A	#N/A
													#N/A	#N/A	#N/A
													#N/A	#N/A	#N/A
													#N/A	#N/A	#N/A
													#N/A	#N/A	#N/A
													#N/A	#N/A	#N/A
													#N/A	#N/A	#N/A
													#N/A	#N/A	#N/A
													#N/A	#N/A	#N/A
													#N/A	#N/A	#N/A
													#N/A	#N/A	#N/A
													#N/A	#N/A	#N/A
													#N/A	#N/A	#N/A
													#N/A	#N/A	#N/A
													#N/A	#N/A	#N/A
													#N/A	#N/A	#N/A
													#N/A	#N/A	#N/A
													#N/A	#N/A	#N/A
													#N/A	#N/A	#N/A
													#N/A	#N/A	#N/A
													#N/A	#N/A	#N/A
													#N/A	#N/A	#N/A
													#N/A	#N/A	#N/A
													#N/A	#N/A	#N/A
													#N/A	#N/A	#N/A
													#N/A	#N/A	#N/A
													#N/A	#N/A	#N/A
													#N/A	#N/A	#N/A
													#N/A	#N/A	#N/A
													#N/A	#N/A	#N/A
													#N/A	#N/A	#N/A
													#N/A	#N/A	#N/A
													#N/A	#N/A	#N/A
													#N/A	#N/A	#N/A
													#N/A	#N/A	#N/A
													#N/A	#N/A	#N/A
													#N/A	#N/A	#N/A
													#N/A	#N/A	#N/A
													#N/A	#N/A	#N/A
													#N/A	#N/A	#N/A
													#N/A	#N/A	#N/A
													#N/A	#N/A	#N/A
													#N/A	#N/A	#N/A
													#N/A	#N/A	#N/A
													#N/A	#N/A	#N/A
													#N/A	#N/A	#N/A
													#N/A	#N/A	#N/A
													#N/A	#N/A	#N/A
													#N/A	#N/A	#N/A
													#N/A	#N/A	#N/A
													#N/A	#N/A	#N/A
													#N/A	#N/A	#N/A
													#N/A	#N/A	#N/A
													#N/A	#N/A	#N/A
													#N/A	#N/A	#N/A
													#N/A	#N/A	#N/A
													#N/A	#N/A	#N/A
													#N/A	#N/A	#N/A
													#N/A	#N/A	#N/A
													#N/A	#N/A	#N/A
													#N/A	#N/A	#N/A
													#N/A	#N/A	#N/A
													#N/A	#N/A	#N/A
													#N/A	#N/A	#N/A
													#N/A	#N/A	#N/A
													#N/A	#N/A	#N/A
													#N/A	#N/A	#N/A
													#N/A	#N/A	#N/A
													#N/A	#N/A	#N/A
													#N/A	#N/A	#N/A
													#N/A	#N/A	#N/A
													#N/A	#N/A	#N/A
													#N/A	#N/A	#N/A
													#N/A	#N/A	#N/A
													#N/A	#N/A	#N/A
													#N/A	#N/A	#N/A
													#N/A	#N/A	#N/A
													#N/A	#N/A	#N/A
													#N/A	#N/A	#N/A
													#N/A	#N/A	#N/A
													#N/A	#N/A	#N/A
													#N/A	#N/A	#N/A
													#N/A	#N/A	#N/A
													#N/A	#N/A	#N/A
													#N/A	#N/A	#N/A
													#N/A	#N/A	#N/A
													#N/A	#N/A	#N/A
													#N/A	#N/A	#N/A
													#N/A	#N/A	#N/A
													#N/A	#N/A	#N/A
													#N/A	#N/A	#N/A
													#N/A	#N/A	#N/A
													#N/A	#N/A	#N/A
													#N/A	#N/A	#N/A
													#N/A	#N/A	#N/A
													#N/A	#N/A	#N/A
													#N/A	#N/A	#N/A
													#N/A	#N/A	#N/A
													#N/A	#N/A	#N/A
													#N/A	#N/A	#N/A
													#N/A	#N/A	#N/A
													#N/A	#N/A	#N/A
													#N/A	#N/A	#N/A
													#N/A	#N/A	#N/A
													#N/A	#N/A	#N/A
													#N/A	#N/A	#N/A
													#N/A	#N/A	#N/A
													#N/A	#N/A	#N/A
													#N/A	#N/A	#N/A
													#N/A	#N/A	#N/A
													#N/A	#N/A	#N/A
													#N/A	#N/A	#N/A
													#N/A	#N/A	#N/A
													#N/A	#N/A	#N/A
													#N/A	#N/A	#N/A
													#N/A	#N/A	#N/A
													#N/A	#N/A	#N/A
													#N/A	#N/A	#N/A
													#N/A	#N/A	#N/A
													#N/A	#N/A	#N/A
													#N/A	#N/A	#N/A
													#N/A	#N/A	#N/A
													#N/A	#N/A	#N/A
													#N/A	#N/A	#N/A
													#N/A	#N/A	#N/A
													#N/A	#N/A	#N/A
													#N/A	#N/A	#N/A
													#N/A	#N/A	#N/A
													#N/A	#N/A	#N/A
													#N/A	#N/A	#N/A
													#N/A	#N/A	#N/A
													#N/A	#N/A	#N/A
													#N/A	#N/A	#N/A
													#N/A	#N/A	#N/A
													#N/A	#N/A	#N/A
													#N/A	#N/A	#N/A
													#N/A	#N/A	#N/A
													#N/A	#N/A	#N/A
													#N/A	#N/A	#N/A
													#N/A	#N/A	#N/A
													#N/A	#N/A	#N/A
													#N/A	#N/A	#N/A
													#N/A	#N/A	#N/A
													#N/A	#N/A	#N/A
													#N/A	#N/A	#N/A
													#N/A	#N/A	#N/A
													#N/A	#N/A	#N/A
													#N/A	#N/A	#N/A
													#N/A	#N/A	#N/A
													#N/A	#N/A	#N/A
													#N/A	#N/A	#N/A
													#N/A	#N/A	#N/A
													#N/A	#N/A	#N/A
													#N/A	#N/A	#N/A
													#N/A	#N/A	#N/A
													#N/A	#N/A	#N/A
													#N/A	#N/A	#N/A
													#N/A	#N/A	#N/A
													#N/A	#N/A	#N/A
													#N/A	#N/A	#N/A
													#N/A	#N/A	#N/A
													#N/A	#N/A	#N/A
													#N/A	#N/A	#N/A
													#N/A	#N/A	#N/A
													#N/A	#N/A	#N/A
													#N/A	#N/A	#N/A
													#N/A	#N/A	#N/A
													#N/A	#N/A	#N/A
													#N/A	#N/A	#N/A
													#N/A	#N/A	#N/A
													#N/A	#N/A	#N/A
													#N/A	#N/A	#N/A
													#N/A	#N/A	#N/A
													#N/A	#N/A	#N/A
													#N/A	#N/A	#N/A
													#N/A	#N/A	#N/A
													#N/A	#N/A	#N/A
													#N/A	#N/A	#N/A
													#N/A	#N/A	#N/A
													#N/A	#N/A	#N/A
													#N/A	#N/A	#N/A
													#N/A	#N/A	#N/A
													#N/A	#N/A	#N/A
													#N/A	#N/A	#N/A
													#N/A	#N/A	#N/A
													#N/A	#N/A	#N/A
													#N/A	#N/A	#N/A
													#N/A	#N/A	#N/A
													#N/A	#N/A	#N/A
													#N/A	#N/A	#N/A
													#N/A	#N/A	#N/A
													#N/A	#N/A	#N/A
													#N/A	#N/A	#N/A
													#N/A	#N/A	#N/A
													#N/A	#N/A	#N/A
													#N/A	#N/A	#N/A
													#N/A	#N/A	#N/A
													#N/A	#N/A	#N/A
													#N/A	#N/A	#N/A
													#N/A	#N/A	#N/A
													#N/A	#N/A	#N/A
													#N/A	#N/A	#N/A
													#N/A	#N/A	#N/A
													#N/A	#N/A	#N/A
													#N/A	#N/A	#N/A
													#N/A	#N/A	#N/A
													#N/A	#N/A	#N/A
													#N/A	#N/A	#N/A
													#N/A	#N/A	#N/A
													#N/A	#N/A	#N/A
													#N/A	#N/A	#N/A
													#N/A	#N/A	#N/A
													#N/A	#N/A	#N/A
													#N/A	#N/A	#N/A
													#N/A	#N/A	#N/A
													#N/A	#N/A	#N/A
													#N/A	#N/A	#N/A
													#N/A	#N/A	#N/A
													#N/A	#N/A	#N/A
													#N/A	#N/A	#N/A
													#N/A	#N/A	#N/A
													#N/A	#N/A	#N/A
													#N/A	#N/A	#N/A
													#N/A	#N/A	#N/A
													#N/A	#N/A	#N/A
													#N/A	#N/A	#N/A
													#N/A	#N/A	#N/A
													#N/A	#N/A	#N/A
													#N/A	#N/A	#N/A
													#N/A	#N/A	#N/A
													#N/A	#N/A	#N/A
													#N/A	#N/A	#N/A
													#N/A	#N/A	#N/A
													#N/A	#N/A	#N/A
													#N/A	#N/A	#N/A
													#N/A	#N/A	#N/A
													#N/A	#N/A	#N/A
													#N/A	#N/A	#N/A
													#N/A	#N/A	#N/A
													#N/A	#N/A	#N/A
													#N/A	#N/A	#N/A
													#N/A	#N/A	#N/A
													#N/A	#N/A	#N/A
													#N/A	#N/A	#N/A
													#N/A	#N/A	#N/A
													#N/A	#N/A	#N/A
													#N/A	#N/A	#N/A
													#N/A	#N/A	#N/A
													#N/A	#N/A	#N/A
													#N/A	#N/A	#N/A
													#N/A	#N/A	#N/A
													#N/A	#N/A	#N/A
													#N/A	#N/A	#N/A
													#N/A	#N/A	#N/A
													#N/A	#N/A	#N/A
													#N/A	#N/A	#N/A
													#N/A	#N/A	#N/A
													#N/A	#N/A	#N/A
													#N/A	#N/A	#N/A
													#N/A	#N/A	#N/A
													#N/A	#N/A	#N/A
													#N/A	#N/A	#N/A
													#N/A	#N/A	#N/A
													#N/A	#N/A	#N/A
													#N/A	#N/A	#N/A
													#N/A	#N/A	#N/A
													#N/A	#N/A	#N/A
													#N/A	#N/A	#N/A
													#N/A	#N/A	#N/A
													#N/A	#N/A	#N/A
													#N/A	#N/A	#N/A
													#N/A	#N/A	#N/A
													#N/A	#N/A	#N/A
													#N/A	#N/A	#N/A
													#N/A	#N/A	#N/A
													#N/A	#N/A	#N/A
													#N/A	#N/A	#N/A
													#N/A	#N/A	#N/A
													#N/A	#N/A	#N/A
													#N/A	#N/A	#N/A
													#N/A	#N/A	#N/A
													#N/A	#N/A	#N/A
													#N/A	#N/A	#N/A
													#N/A	#N/A	#N/A
													#N/A	#N/A	#N/A
													#N/A	#N/A	#N/A
													#N/A	#N/A	#N/A
													#N/A	#N/A	#N/A
													#N/A	#N/A	#N/A
													#N/A	#N/A	#N/A
													#N/A	#N/A	#N/A
													#N/A	#N/A	#N/A
													#N/A	#N/A	#N/A
													#N/A	#N/A	#N/A
													#N/A	#N/A	#N/A
													#N/A	#N/A	#N/A
													#N/A	#N/A	#N/A
													#N/A	#N/A	#N/A
													#N/A	#N/A	#N/A
													#N/A	#N/A	#N/A
													#N/A	#N/A	#N/A
													#N/A	#N/A	#N/A
													#N/A	#N/A	#N/A
													#N/A	#N/A	#N/A
													#N/A	#N/A	#N/A
													#N/A	#N/A	#N/A
													#N/A	#N/A	#N/A
													#N/A	#N/A	#N/A
													#N/A	#N/A	#N/A
													#N/A	#N/A	#N/A
													#N/A	#N/A	#N/A
													#N/A	#N/A	#N/A
													#N/A	#N/A	#N/A
													#N/A	#N/A	#N/A
													#N/A	#N/A	#N/A
													#N/A	#N/A	#N/A
													#N/A	#N/A	#N/A
													#N/A	#N/A	#N/A
													#N/A	#N/A	#N/A
													#N/A	#N/A	#N/A
													#N/A	#N/A	#N/A
													#N/A	#N/A	#N/A
													#N/A	#N/A	#N/A
													#N/A	#N/A	#N/A
													#N/A	#N/A	#N/A
													#N/A	#N/A	#N/A
													#N/A	#N/A	#N/A
													#N/A	#N/A	#N/A
													#N/A	#N/A	#N/A
													#N/A	#N/A	#N/A
													#N/A	#N/A	#N/A
													#N/A	#N/A	#N/A
													#N/A	#N/A	#N/A
													#N/A	#N/A	#N/A
													#N/A	#N/A	#N/A
													#N/A	#N/A	#N/A
													#N/A	#N/A	#N/A
													#N/A	#N/A	#N/A
													#N/A	#N/A	#N/A
													#N/A	#N/A	#N/A
													#N/A	#N/A	#N/A
													#N/A	#N/A	#N/A
													#N/A	#N/A	#N/A
													#N/A	#N/A	#N/A
													#N/A	#N/A	#N/A
													#N/A	#N/A	#N/A
													#N/A	#N/A	#N/A
													#N/A	#N/A	#N/A
													#N/A	#N/A	#N/A
													#N/A	#N/A	#N/A
													#N/A	#N/A	#N/A
													#N/A	#N/A	#N/A
													#N/A	#N/A	#N/A
													#N/A	#N/A	#N/A
													#N/A	#N/A	#N/A
													#N/A	#N/A	#N/A
													#N/A	#N/A	#N/A
													#N/A	#N/A	#N/A
													#N/A	#N/A	#N/A
													#N/A	#N/A	#N/A
													#N/A	#N/A	#N/A
													#N/A	#N/A	#N/A
													#N/A	#N/A	#N/A
													#N/A	#N/A	#N/A
													#N/A	#N/A	#N/A
													#N/A	#N/A	#N/A
													#N/A	#N/A	#N/A
													#N/A	#N/A	#N/A
													#N/A	#N/A	#N/A
													#N/A	#N/A	#N/A
													#N/A	#N/A	#N/A
													#N/A	#N/A	#N/A
													#N/A	#N/A	#N/A
													#N/A	#N/A	#N/A
													#N/A	#N/A	#N/A
													#N/A	#N/A	#N/A
													#N/A	#N/A	#N/A
													#N/A	#N/A	#N/A
													#N/A	#N/A	#N/A
													#N/A	#N/A	#N/A
													#N/A	#N/A	#N/A
													#N/A	#N/A	#N/A
													#N/A	#N/A	#N/A
													#N/A	#N/A	#N/A
													#N/A	#N/A	#N/A
													#N/A	#N/A	#N/A
													#N/A	#N/A	#N/A
													#N/A	#N/A	#N/A
													#N/A	#N/A	#N/A
													#N/A	#N/A	#N/A
													#N/A	#N/A	#N/A
													#N/A	#N/A	#N/A
													#N/A	#N/A	#N/A
													#N/A	#N/A	#N/A
													#N/A	#N/A	#N/A
													#N/A	#N/A	#N/A
													#N/A	#N/A	#N/A
													#N/A	#N/A	#N/A
													#N/A	#N/A	#N/A
													#N/A	#N/A	#N/A
													#N/A	#N/A	#N/A
													#N/A	#N/A	#N/A
													#N/A	#N/A	#N/A
													#N/A	#N/A	#N/A
													#N/A	#N/A	#N/A
													#N/A	#N/A	#N/A
													#N/A	#N/A	#N/A
													#N/A	#N/A	#N/A
													#N/A	#N/A	#N/A
													#N/A	#N/A	#N/A
													#N/A	#N/A	#N/A
													#N/A	#N/A	#N/A
													#N/A	#N/A	#N/A
													#N/A	#N/A	#N/A
													#N/A	#N/A	#N/A
													#N/A	#N/A	#N/A
													#N/A	#N/A	#N/A
													#N/A	#N/A	#N/A
													#N/A	#N/A	#N/A
													#N/A	#N/A	#N/A
													#N/A	#N/A	#N/A
													#N/A	#N/A	#N/A
													#N/A	#N/A	#N/A
													#N/A	#N/A	#N/A
													#N/A	#N/A	#N/A
													#N/A	#N/A	#N/A
													#N/A	#N/A	#N/A
													#N/A	#N/A	#N/A
													#N/A	#N/A	#N/A
													#N/A	#N/A	#N/A
													#N/A	#N/A	#N/A
													#N/A	#N/A	#N/A
													#N/A	#N/A	#N/A
													#N/A	#N/A	#N/A
													#N/A	#N/A	#N/A
													#N/A	#N/A	#N/A
													#N/A	#N/A	#N/A
													#N/A	#N/A	#N/A
													#N/A	#N/A	#N/A
													#N/A	#N/A	#N/A
													#N/A	#N/A	#N/A
													#N/A	#N/A	#N/A
													#N/A	#N/A	#N/A
													#N/A	#N/A	#N/A
													#N/A	#N/A	#N/A
													#N/A	#N/A	#N/A
													#N/A	#N/A	#N/A
													#N/A	#N/A	#N/A
													#N/A	#N/A	#N/A
													#N/A	#N/A	#N/A
													#N/A	#N/A	#N/A
													#N/A	#N/A	#N/A
													#N/A	#N/A	#N/A
													#N/A	#N/A	#N/A
													#N/A	#N/A	#N/A
													#N/A	#N/A	#N/A
													#N/A	#N/A	#N/A
													#N/A	#N/A	#N/A
													#N/A	#N/A	#N/A
													#N/A	#N/A	#N/A
													#N/A	#N/A	#N/A
													#N/A	#N/A	#N/A
													#N/A	#N/A	#N/A
													#N/A	#N/A	#N/A
													#N/A	#N/A	#N/A
													#N/A	#N/A	#N/A
													#N/A	#N/A	#N/A
													#N/A	#N/A	#N/A
													#N/A	#N/A	#N/A
													#N/A	#N/A	#N/A
													#N/A	#N/A	#N/A
													#N/A	#N/A	#N/A
													#N/A	#N/A	#N/A
													#N/A	#N/A	#N/A
													#N/A	#N/A	#N/A
													#N/A	#N/A	#N/A
													#N/A	#N/A	#N/A
													#N/A	#N/A	#N/A
													#N/A	#N/A	#N/A
													#N/A	#N/A	#N/A
													#N/A	#N/A	#N/A
													#N/A	#N/A	#N/A
													#N/A	#N/A	#N/A
													#N/A	#N/A	#N/A
													#N/A	#N/A	#N/A
													#N/A	#N/A	#N/A
													#N/A	#N/A	#N/A
													#N/A	#N/A	#N/A
													#N/A	#N/A	#N/A
													#N/A	#N/A	#N/A
													#N/A	#N/A	#N/A
													#N/A	#N/A	#N/A
													#N/A	#N/A	#N/A
													#N/A	#N/A	#N/A
													#N/A	#N/A	#N/A
													#N/A	#N/A	#N/A
													#N/A	#N/A	#N/A
													#N/A	#N/A	#N/A
													#N/A	#N/A	#N/A
													#N/A	#N/A	#N/A
													#N/A	#N/A	#N/A
													#N/A	#N/A	#N/A
													#N/A	#N/A	#N/A
													#N/A	#N/A	#N/A
													#N/A	#N/A	#N/A
													#N/A	#N/A	#N/A
													#N/A	#N/A	#N/A
													#N/A	#N/A	#N/A
													#N/A	#N/A	#N/A
													#N/A	#N/A	#N/A
													#N/A	#N/A	#N/A
													#N/A	#N/A	#N/A
													#N/A	#N/A	#N/A
													#N/A	#N/A	#N/A
													#N/A	#N/A	#N/A
													#N/A	#N/A	#N/A
													#N/A	#N/A	#N/A
													#N/A	#N/A	#N/A
													#N/A	#N/A	#N/A
													#N/A	#N/A	#N/A
													#N/A	#N/A	#N/A
													#N/A	#N/A	#N/A
													#N/A	#N/A	#N/A
													#N/A	#N/A	#N/A
													#N/A	#N/A	#N/A
													#N/A	#N/A	#N/A
													#N/A	#N/A	#N/A
													#N/A	#N/A	#N/A
													#N/A	#N/A	#N/A
													#N/A	#N/A	#N/A
													#N/A	#N/A	#N/A
													#N/A	#N/A	#N/A
													#N/A	#N/A	#N/A
													#N/A	#N/A	#N/A
													#N/A	#N/A	#N/A
													#N/A	#N/A	#N/A
													#N/A	#N/A	#N/A
													#N/A	#N/A	#N/A
													#N/A	#N/A	#N/A
													#N/A	#N/A	#N/A
													#N/A	#N/A	#N/A
													#N/A	#N/A	#N/A
													#N/A	#N/A	#N/A
													#N/A	#N/A	#N/A
													#N/A	#N/A	#N/A
													#N/A	#N/A	#N/A
													#N/A	#N/A	#N/A
													#N/A	#N/A	#N/A
													#N/A	#N/A	#N/A
													#N/A	#N/A	#N/A
													#N/A	#N/A	#N/A
													#N/A	#N/A	#N/A
													#N/A	#N/A	#N/A
													#N/A	#N/A	#N/A
													#N/A	#N/A	#N/A
													#N/A	#N/A	#N/A
													#N/A	#N/A	#N/A
													#N/A	#N/A	#N/A
													#N/A	#N/A	#N/A
													#N/A	#N/A	#N/A
													#N/A	#N/A	#N/A
													#N/A	#N/A	#N/A
													#N/A	#N/A	#N/A
													#N/A	#N/A	#N/A
													#N/A	#N/A	#N/A
													#N/A	#N/A	#N/A
													#N/A	#N/A	#N/A
													#N/A	#N/A	#N/A
													#N/A	#N/A	#N/A
													#N/A	#N/A	#N/A
													#N/A	#N/A	#N/A
													#N/A	#N/A	#N/A
													#N/A	#N/A	#N/A
													#N/A	#N/A	#N/A
													#N/A	#N/A	#N/A
													#N/A	#N/A	#N/A
													#N/A	#N/A	#N/A
													#N/A	#N/A	#N/A
													#N/A	#N/A	#N/A
													#N/A	#N/A	#N/A
													#N/A	#N/A	#N/A
													#N/A	#N/A	#N/A
													#N/A	#N/A	#N/A
													#N/A	#N/A	#N/A
													#N/A	#N/A	#N/A
													#N/A	#N/A	#N/A
													#N/A	#N/A	#N/A
													#N/A	#N/A	#N/A
													#N/A	#N/A	#N/A
													#N/A	#N/A	#N/A
													#N/A	#N/A	#N/A
													#N/A	#N/A	#N/A
													#N/A	#N/A	#N/A
													#N/A	#N/A	#N/A
													#N/A	#N/A	#N/A
													#N/A	#N/A	#N/A
													#N/A	#N/A	#N/A
													#N/A	#N/A	#N/A
													#N/A	#N/A	#N/A
													#N/A	#N/A	#N/A
													#N/A	#N/A	#N/A
													#N/A	#N/A	#N/A
													#N/A	#N/A	#N/A
													#N/A	#N/A	#N/A
													#N/A	#N/A	#N/A
													#N/A	#N/A	#N/A
													#N/A	#N/A	#N/A
													#N/A	#N/A	#N/A
													#N/A	#N/A	#N/A
													#N/A	#N/A	#N/A
													#N/A	#N/A	#N/A
													#N/A	#N/A	#N/A
													#N/A	#N/A	#N/A
													#N/A	#N/A	#N/A
													#N/A	#N/A	#N/A
													#N/A	#N/A	#N/A
													#N/A	#N/A	#N/A
													#N/A	#N/A	#N/A
													#N/A	#N/A	#N/A
													#N/A	#N/A	#N/A
													#N/A	#N/A	#N/A
													#N/A	#N/A	#N/A
													#N/A	#N/A	#N/A
													#N/A	#N/A	#N/A
													#N/A	#N/A	#N/A
													#N/A	#N/A	#N/A
													#N/A	#N/A	#N/A
													#N/A	#N/A	#N/A
													#N/A	#N/A	#N/A
													#N/A	#N/A	#N/A
													#N/A	#N/A	#N/A
													#N/A	#N/A	#N/A
													#N/A	#N/A	#N/A
													#N/A	#N/A	#N/A
													#N/A	#N/A	#N/A
													#N/A	#N/A	#N/A
													#N/A	#N/A	#N/A
													#N/A	#N/A	#N/A
													#N/A	#N/A	#N/A
													#N/A	#N/A	#N/A
													#N/A	#N/A	#N/A
													#N/A	#N/A	#N/A
													#N/A	#N/A	#N/A
													#N/A	#N/A	#N/A
													#N/A	#N/A	#N/A
													#N/A	#N/A	#N/A
													#N/A	#N/A	#N/A
													#N/A	#N/A	#N/A
													#N/A	#N/A	#N/A
													#N/A	#N/A	#N/A
													#N/A	#N/A	#N/A
													#N/A	#N/A	#N/A
													#N/A	#N/A	#N/A
													#N/A	#N/A	#N/A
													#N/A	#N/A	#N/A
													#N/A	#N/A	#N/A
													#N/A	#N/A	#N/A
													#N/A	#N/A	#N/A
													#N/A	#N/A	#N/A
													#N/A	#N/A	#N/A
													#N/A	#N/A	#N/A
													#N/A	#N/A	#N/A
													#N/A	#N/A	#N/A
													#N/A	#N/A	#N/A
													#N/A	#N/A	#N/A
													#N/A	#N/A	#N/A
													#N/A	#N/A	#N/A
													#N/A	#N/A	#N/A
													#N/A	#N/A	#N/A
													#N/A	#N/A	#N/A
													#N/A	#N/A	#N/A
													#N/A	#N/A	#N/A
													#N/A	#N/A	#N/A
													#N/A	#N/A	#N/A
													#N/A	#N/A	#N/A
													#N/A	#N/A	#N/A
													#N/A	#N/A	#N/A
													#N/A	#N/A	#N/A
													#N/A	#N/A	#N/A
													#N/A	#N/A	#N/A
													#N/A	#N/A	#N/A
													#N/A	#N/A	#N/A
													#N/A	#N/A	#N/A
													#N/A	#N/A	#N/A
													#N/A	#N/A	#N/A
													#N/A	#N/A	#N/A
													#N/A	#N/A	#N/A
													#N/A	#N/A	#N/A
													#N/A	#N/A	#N/A
													#N/A	#N/A	#N/A
													#N/A	#N/A	#N/A
													#N/A	#N/A	#N/A
													#N/A	#N/A	#N/A
													#N/A	#N/A	#N/A
													#N/A	#N/A	#N/A
													#N/A	#N/A	#N/A
													#N/A	#N/A	#N/A
													#N/A	#N/A	#N/A
													#N/A	#N/A	#N/A
													#N/A	#N/A	#N/A
													#N/A	#N/A	#N/A
													#N/A	#N/A	#N/A
													#N/A	#N/A	#N/A
													#N/A	#N/A	#N/A
													#N/A	#N/A	#N/A
													#N/A	#N/A	#N/A
													#N/A	#N/A	#N/A
													#N/A	#N/A	#N/A
													#N/A	#N/A	#N/A
													#N/A	#N/A	#N/A
													#N/A	#N/A	#N/A
													#N/A	#N/A	#N/A
													#N/A	#N/A	#N/A
													#N/A	#N/A	#N/A
													#N/A	#N/A	#N/A
													#N/A	#N/A	#N/A
													#N/A	#N/A	#N/A
													#N/A	#N/A	#N/A
													#N/A	#N/A	#N/A
													#N/A	#N/A	#N/A
													#N/A	#N/A	#N/A
													#N/A	#N/A	#N/A
													#N/A	#N/A	#N/A
													#N/A	#N/A	#N/A
													#N/A	#N/A	#N/A
													#N/A	#N/A	#N/A
													#N/A	#N/A	#N/A
													#N/A	#N/A	#N/A
													#N/A	#N/A	#N/A
													#N/A	#N/A	#N/A
													#N/A	#N/A	#N/A
													#N/A	#N/A	#N/A
													#N/A	#N/A	#N/A
													#N/A	#N/A	#N/A
													#N/A	#N/A	#N/A
													#N/A	#N/A	#N/A
													#N/A	#N/A	#N/A
													#N/A	#N/A	#N/A
													#N/A	#N/A	#N/A
													#N/A	#N/A	#N/A
													#N/A	#N/A	#N/A
													#N/A	#N/A	#N/A
													#N/A	#N/A	#N/A
													#N/A	#N/A	#N/A
													#N/A	#N/A	#N/A
													#N/A	#N/A	#N/A
													#N/A	#N/A	#N/A
													#N/A	#N/A	#N/A
													#N/A	#N/A	#N/A
													#N/A	#N/A	#N/A
													#N/A	#N/A	#N/A
													#N/A	#N/A	#N/A
													#N/A	#N/A	#N/A
													#N/A	#N/A	#N/A
													#N/A	#N/A	#N/A
													#N/A	#N/A	#N/A
													#N/A	#N/A	#N/A
													#N/A	#N/A	#N/A
													#N/A	#N/A	#N/A
													#N/A	#N/A	#N/A
													#N/A	#N/A	#N/A
													#N/A	#N/A	#N/A
													#N/A	#N/A	#N/A
													#N/A	#N/A	#N/A
													#N/A	#N/A	#N/A
													#N/A	#N/A	#N/A
													#N/A	#N/A	#N/A
													#N/A	#N/A	#N/A
													#N/A	#N/A	#N/A
													#N/A	#N/A	#N/A
													#N/A	#N/A	#N/A
													#N/A	#N/A	#N/A
													#N/A	#N/A	#N/A
													#N/A	#N/A	#N/A
													#N/A	#N/A	#N/A
													#N/A	#N/A	#N/A
													#N/A	#N/A	#N/A
													#N/A	#N/A	#N/A
													#N/A	#N/A	#N/A
													#N/A	#N/A	#N/A
													#N/A	#N/A	#N/A
													#N/A	#N/A	#N/A
													#N/A	#N/A	#N/A
													#N/A	#N/A	#N/A
													#N/A	#N/A	#N/A
													#N/A	#N/A	#N/A
													#N/A	#N/A	#N/A
													#N/A	#N/A	#N/A
													#N/A	#N/A	#N/A
													#N/A	#N/A	#N/A
													#N/A	#N/A	#N/A
													#N/A	#N/A	#N/A
													#N/A	#N/A	#N/A
													#N/A	#N/A	#N/A
													#N/A	#N/A	#N/A
													#N/A	#N/A	#N/A
													#N/A	#N/A	#N/A
													#N/A	#N/A	#N/A
													#N/A	#N/A	#N/A
													#N/A	#N/A	#N/A
													#N/A	#N/A	#N/A
[truncated: 1,046,576+ more rows]

## Sheet: sheet1
	0	1	2	3	4	5	6	7	8	9	10	11	12	13	14	15	16
0	1	0.979885	0.97436	0.771238	0.732626	0.562971	0.523286	0.444146	0.355324	0.266928	0.225661	0.181776	0.150167	0.131309	0.108695	0.0851535	0.0699516
1		0.0197107	0.0251244	0.223008	0.250456	0.362113	0.376271	0.398505	0.407633	0.39462	0.374879	0.34586	0.317327	0.296335	0.267914	0.23343	0.206959
2			2.31678e-05	0.00532557	0.016224	0.0704654	0.0910238	0.134164	0.187028	0.241909	0.265518	0.286785	0.297058	0.299603	0.299041	0.292299	0.28179
3				2.31678e-05	0.000288636	0.00397881	0.00866549	0.0211211	0.0437278	0.0793774	0.104505	0.135817	0.16207	0.179021	0.199788	0.221284	0.233962
4					2.31678e-05	6.77311e-05	0.000343426	0.00160203	0.00550554	0.0150143	0.0249648	0.0404331	0.0570198	0.0702117	0.088951	0.112956	0.132295
5						2.31678e-05	5.02408e-06	5.6203e-05	0.000365344	0.0016441	0.00371113	0.00784437	0.0135114	0.018975	0.0277991	0.0410435	0.0538816
6							2.31678e-05	7.75899e-07	1.18604e-05	9.97984e-05	0.000338547	0.000994418	0.00218559	0.00360785	0.00625441	0.0109206	0.0162982
7								2.31678e-05	1.57458e-07	3.06887e-06	1.80233e-05	8.03559e-05	0.000239306	0.000483715	0.00102176	0.00215505	0.00371991
8									2.31678e-05	3.96019e-08	5.07926e-07	3.91415e-06	1.7207e-05	4.50976e-05	0.000120637	0.000315803	0.000644153
9										2.31678e-05	6.24289e-09	1.03806e-07	7.66404e-07	2.83097e-06	1.01102e-05	3.40483e-05	8.43481e-05
10											2.31678e-05	1.2318e-09	1.90689e-08	1.12917e-07	5.81023e-07	2.64487e-06	8.25111e-06
11												2.31678e-05	2.17742e-10	2.58502e-09	2.15866e-08	1.4275e-07	5.89437e-07
12													2.31678e-05	2.79948e-11	4.68369e-10	5.0422e-09	2.96263e-08
13														2.31678e-05	4.89873e-12	1.05278e-10	9.86633e-10
14															2.31678e-05	1.0736e-12	1.96765e-11
15																2.31678e-05	1.94528e-13
16																	2.31678e-05
