# Supplementary material for: Probabilistic En Route Sector Traffic Demand Prediction Based upon Statistical Analysis of Error Distribution Characteristics
Source: Hindawi journal article supplement (doi:10.1155/2018/8184513), 2018-08-13
Supplement: f1 [file 8184513.f1.rar › Fig.8 AR07-0700-0714.xlsx]

## Sheet: 0700-0714
CALLSIGN	PASSSECTOR	EINSECTORTIME	EOUTSECTORTIME	OPINSECTORTIME	OPOUTSECTORTIME	ATD	FlyTime	Predicted Time Error ∆ti(in)	Predicted Time Error ∆ti(out)	probability distribution(in)	probability distribution(out)	The probability of the aircraft in AR07	0	0	1
CHB6287	ZGGGAR07	2014-05-02 07:17:38	2014-05-02 07:22:28	2014-05-02 07:03:27	2014-05-02 07:08:17	2014-05-02 06:41:00	1900-01-01 00:22:27	14.1833	14.1833	0.854899	0.845626	0.131975	1	0	0.868025
CHB6287	ZGGGAR07	2014-05-03 07:21:38	2014-05-03 07:26:28	2014-05-03 07:06:11	2014-05-03 07:11:01	2014-05-03 06:45:00	1900-01-01 00:21:11	15.45	15.45	0.883398	0.874578	0.110798	1	1	0.114557
CBJ112	ZGGGAR07	2014-05-03 07:15:02	2014-05-03 07:29:52	2014-05-03 07:11:24	2014-05-03 07:23:03	2014-05-03 06:38:00	1900-01-01 00:33:24	3.63333	6.81667	0.47517	0.602253	0.188998	2	0	0.77185
CCA1877	ZGGGAR07	2014-05-04 06:47:37	2014-05-04 06:59:09	2014-05-04 07:05:16	2014-05-04 07:16:48	2014-05-04 03:48:00	1900-01-01 03:17:16	-17.65	-17.65	0.0101257	0.0118934	0.0100053	2	2	0.0126927
CBJ5400	ZGGGAR07	2014-05-05 07:26:38	2014-05-05 07:31:28	2014-05-05 07:09:38	2014-05-05 07:14:28	2014-05-05 06:50:00	1900-01-01 00:19:38	17	17	0.91256	0.904551	0.0871025	2	1	0.19804
CCA1877	ZGGGAR07	2014-05-06 06:59:37	2014-05-06 07:11:09	2014-05-06 07:00:07	2014-05-06 07:11:39	2014-05-06 04:00:00	1900-01-01 03:00:07	-0.5	-0.5	0.308164	0.310535	0.212468	3	0	0.625972
CCA1877	ZGGGAR07	2014-05-07 07:00:37	2014-05-07 07:12:09	2014-05-07 07:01:19	2014-05-07 07:12:51	2014-05-07 04:01:00	1900-01-01 03:00:19	-0.7	-0.7	0.300733	0.3033	0.209521	3	3	0.00239889
CCA1877	ZGGGAR07	2014-05-08 07:06:37	2014-05-08 07:18:09	2014-05-08 07:03:19	2014-05-08 07:14:51	2014-05-08 04:07:00	1900-01-01 02:56:19	3.3	3.3	0.461099	0.458987	0.249461	3	1	0.306489
CHB6287	ZGGGAR07	2014-05-08 07:19:38	2014-05-08 07:24:28	2014-05-08 07:05:03	2014-05-08 07:09:53	2014-05-08 06:43:00	1900-01-01 00:22:03	14.5833	14.5833	0.864365	0.855211	0.125151	3	2	0.0477228
CSZ9981	ZGGGAR07	2014-05-08 06:51:52	2014-05-08 07:03:18	2014-05-08 07:05:46	2014-05-08 07:17:12	2014-05-08 06:34:00	1900-01-01 00:31:46	-13.9	-13.9	0.0272044	0.0304407	0.0263763	4	0	0.619709
CHB6287	ZGGGAR07	2014-05-09 07:22:38	2014-05-09 07:27:28	2014-05-09 07:08:26	2014-05-09 07:13:16	2014-05-09 06:46:00	1900-01-01 00:22:26	14.2	14.2	0.855302	0.846033	0.131688	4	4	2.40016e-05
CCA1877	ZGGGAR07	2014-05-09 07:08:37	2014-05-09 07:20:09	2014-05-09 07:12:37	2014-05-09 07:24:09	2014-05-09 04:09:00	1900-01-01 03:03:37	-4	-4	0.191437	0.196334	0.153852	4	1	0.309685
CCA1877	ZGGGAR07	2014-05-10 07:07:37	2014-05-10 07:19:09	2014-05-10 07:10:32	2014-05-10 07:22:04	2014-05-10 04:08:00	1900-01-01 03:02:32	-2.91667	-2.91667	0.224343	0.228674	0.173041	4	2	0.0503119
CBJ5400	ZGGGAR07	2014-05-11 07:14:38	2014-05-11 07:19:28	2014-05-11 07:01:28	2014-05-11 07:06:18	2014-05-11 06:38:00	1900-01-01 00:23:28	13.1667	13.1667	0.828881	0.819418	0.149681	4	3	0.00285237
CCA1877	ZGGGAR07	2014-05-11 06:58:37	2014-05-11 07:10:09	2014-05-11 07:02:51	2014-05-11 07:14:23	2014-05-11 03:59:00	1900-01-01 03:03:51	-4.23333	-4.23333	0.184758	0.18975	0.1497	5	0	0.565731
CCA1877	ZGGGAR07	2014-05-12 07:23:37	2014-05-12 07:35:09	2014-05-12 07:11:46	2014-05-12 07:20:07	2014-05-12 04:24:00	1900-01-01 02:47:46	11.85	15.0333	0.791024	0.865505	0.106389	5	5	2.0906e-06
CCA1877	ZGGGAR07	2014-05-13 06:57:37	2014-05-13 07:09:09	2014-05-13 07:02:04	2014-05-13 07:13:36	2014-05-13 03:58:00	1900-01-01 03:04:04	-4.45	-4.45	0.178687	0.183759	0.145851	5	1	0.336689
CSN6359	ZGGGAR07	2014-05-13 07:17:38	2014-05-13 07:22:28	2014-05-13 07:02:32	2014-05-13 07:07:22	2014-05-13 06:41:00	1900-01-01 00:21:32	15.1	15.1	0.875953	0.866986	0.116514	5	2	0.0729039
CHH7163	ZGGGAR07	2014-05-13 07:03:53	2014-05-13 07:15:25	2014-05-13 07:09:53	2014-05-13 07:21:25	2014-05-13 06:46:00	1900-01-01 00:23:53	-6	-6	0.138977	0.144399	0.118909	5	3	0.00698621
CHB6287	ZGGGAR07	2014-05-14 07:15:38	2014-05-14 07:20:28	2014-05-14 07:02:53	2014-05-14 07:07:43	2014-05-14 06:39:00	1900-01-01 00:23:53	12.75	12.75	0.817405	0.807915	0.157012	5	4	0.000270359
CCA1877	ZGGGAR07	2014-05-14 07:09:37	2014-05-14 07:21:09	2014-05-14 07:09:02	2014-05-14 07:20:34	2014-05-14 04:10:00	1900-01-01 02:59:02	0.583333	0.583333	0.349727	0.350946	0.226992	6	0	0.445531
CSN6629	ZGGGAR07	2014-05-16 07:05:38	2014-05-16 07:20:07	2014-05-16 07:04:02	2014-05-16 07:17:07	2014-05-16 06:29:00	1900-01-01 00:35:02	1.6	3	0.390456	0.446748	0.21602	6	6	4.44186e-07
CCA1877	ZGGGAR07	2014-05-16 07:10:37	2014-05-16 07:22:09	2014-05-16 07:08:41	2014-05-16 07:20:13	2014-05-16 04:11:00	1900-01-01 02:57:41	1.93333	1.93333	0.404101	0.403718	0.240958	6	1	0.385353
CCA1877	ZGGGAR07	2014-05-17 07:08:37	2014-05-17 07:20:09	2014-05-17 07:08:25	2014-05-17 07:19:57	2014-05-17 04:09:00	1900-01-01 02:59:25	0.2	0.2	0.33478	0.336423	0.222152	6	2	0.12895
CCA1877	ZGGGAR07	2014-05-18 07:05:37	2014-05-18 07:17:09	2014-05-18 07:06:02	2014-05-18 07:17:34	2014-05-18 04:06:00	1900-01-01 03:00:02	-0.416667	-0.416667	0.311284	0.313571	0.213674	6	3	0.0209916
CCA1877	ZGGGAR07	2014-05-19 07:09:37	2014-05-19 07:21:09	2014-05-19 07:10:14	2014-05-19 07:21:46	2014-05-19 04:10:00	1900-01-01 03:00:14	-0.616667	-0.616667	0.303819	0.306305	0.210758	6	4	0.00169726
CBJ5400	ZGGGAR07	2014-05-20 07:33:08	2014-05-20 07:38:07	2014-05-20 07:12:16	2014-05-20 07:17:15	2014-05-20 06:56:00	1900-01-01 00:16:16	20.8667	20.8667	0.961399	0.956009	0.0422925	6	5	5.90892e-05
CCA1877	ZGGGAR07	2014-05-21 07:05:37	2014-05-21 07:17:09	2014-05-21 07:03:16	2014-05-21 07:14:48	2014-05-21 04:06:00	1900-01-01 02:57:16	2.35	2.35	0.421322	0.420418	0.24419	7	0	0.352183
CHB6287	ZGGGAR07	2014-05-23 07:17:38	2014-05-23 07:22:28	2014-05-23 07:03:26	2014-05-23 07:08:16	2014-05-23 06:41:00	1900-01-01 00:22:26	14.2	14.2	0.855302	0.846033	0.131688	7	7	9.30662e-08
CCA1877	ZGGGAR07	2014-05-24 07:10:37	2014-05-24 07:22:09	2014-05-24 07:05:43	2014-05-24 07:17:15	2014-05-24 04:11:00	1900-01-01 02:54:43	4.9	4.9	0.528773	0.524636	0.25136	7	1	0.397962
CSN3923	ZGGGAR07	2014-05-25 06:52:00	2014-05-25 07:04:04	2014-05-25 07:03:00	2014-05-25 07:14:22	2014-05-25 06:34:00	1900-01-01 00:29:00	-11	-10.3	0.0530784	0.0663416	0.0495571	7	2	0.182672
CCA1877	ZGGGAR07	2014-05-26 07:16:37	2014-05-26 07:28:09	2014-05-26 07:07:05	2014-05-26 07:18:37	2014-05-26 04:17:00	1900-01-01 02:50:05	9.53333	9.53333	0.713639	0.705044	0.210492	7	3	0.0436111
CXA8363	ZGGGAR07	2014-05-27 07:02:53	2014-05-27 07:14:25	2014-05-27 07:09:46	2014-05-27 07:27:02	2014-05-27 06:45:00	1900-01-01 00:24:46	-6.88333	-12.6167	0.119259	0.0407376	0.114401	7	4	0.00573984
CCA1877	ZGGGAR07	2014-05-28 07:06:37	2014-05-28 07:18:09	2014-05-28 07:00:48	2014-05-28 07:12:20	2014-05-28 04:07:00	1900-01-01 02:53:48	5.81667	5.81667	0.567297	0.562061	0.248442	7	5	0.000402321
CHB6287	ZGGGAR07	2014-05-29 07:18:38	2014-05-29 07:23:28	2014-05-29 07:05:46	2014-05-29 07:10:36	2014-05-29 06:42:00	1900-01-01 00:23:46	12.8667	12.8667	0.820666	0.81118	0.154958	7	6	1.27315e-05
CHB6287	ZGGGAR07	2014-05-30 07:19:38	2014-05-30 07:24:28	2014-05-30 07:04:29	2014-05-30 07:09:19	2014-05-30 06:43:00	1900-01-01 00:21:29	15.15	15.15	0.877036	0.868089	0.11569	8	0	0.264327
								9.42215	9.71091				8	8	2.32164e-08
													8	1	0.386542
													8	2	0.236378
													8	3	0.0783013
													8	4	0.0151872
													8	5	0.00173382
													8	6	0.000109919
													8	7	3.24587e-06
													9	0	0.231246
													9	9	2.90555e-09
													9	1	0.371247
													9	2	0.255171
													9	3	0.0980848
													9	4	0.023086
													9	5	0.00341753
													9	6	0.000313152
													9	7	1.65961e-05
													9	8	4.26534e-07
													10	0	0.225147
													10	10	7.66377e-11
													10	1	0.367554
													10	2	0.258233
													10	3	0.102228
													10	4	0.0250642
													10	5	0.00393631
													10	6	0.000395034
													10	7	2.44181e-05
													10	8	8.53028e-07
													10	9	1.40793e-08
													11	0	0.195498
													11	11	1.00923e-11
													11	1	0.348801
													11	2	0.272629
													11	3	0.122772
													11	4	0.0352258
													11	5	0.00671861
													11	6	0.000861379
													11	7	7.32239e-05
													11	8	3.95627e-06
													11	9	1.24559e-07
													11	10	1.92063e-09
													12	0	0.16542
													12	12	1.55272e-12
													12	1	0.325215
													12	2	0.284348
													12	3	0.145828
													12	4	0.048695
													12	5	0.0111045
													12	6	0.00176252
													12	7	0.000194483
													12	8	1.46132e-05
													12	9	7.14075e-07
													12	10	2.07887e-08
													12	11	3.04031e-10
													13	0	0.136796
													13	13	2.68684e-13
													13	1	0.297564
													13	2	0.29142
													13	3	0.169798
													13	4	0.065503
													13	5	0.0176092
													13	6	0.00337907
													13	7	0.000465819
													13	8	4.57381e-05
													13	9	3.1192e-06
													13	10	1.40756e-07
													13	11	3.84873e-09
													13	12	5.3894e-11
													14	0	0.11632
													14	14	4.0217e-14
													14	1	0.2735
													14	2	0.292339
													14	3	0.188002
													14	4	0.0811139
													14	5	0.024778
													14	6	0.00550905
													14	7	0.000901878
													14	8	0.000108616
													14	9	9.49845e-06
													14	10	5.86574e-07
													14	11	2.43412e-08
													14	12	6.21911e-10
													14	13	8.29539e-12
													15	0	0.0989068
													15	15	6.02048e-15
													15	1	0.24997
													15	2	0.289519
													15	3	0.203622
													15	4	0.0971151
													15	5	0.0332115
													15	6	0.00839362
													15	7	0.00159157
													15	8	0.000227368
													15	9	2.43364e-05
													15	10	1.92068e-06
													15	11	1.08507e-07
													15	12	4.17269e-09
													15	13	1.00154e-10
													15	14	1.27602e-12
													16	0	0.0883842
													16	16	6.40513e-16
													16	1	0.233898
													16	2	0.285312
													16	3	0.21276
													16	4	0.108446
													16	5	0.0400101
													16	6	0.011034
													16	7	0.00231524
													16	8	0.000372504
													16	9	4.59367e-05
													16	10	4.30547e-06
													16	11	3.01303e-07
													16	12	1.52728e-08
													16	13	5.33426e-10
													16	14	1.17955e-11
													16	15	1.41134e-13
													17	0	0.0754932
													17	17	9.34197e-17
													17	1	0.212675
													17	2	0.277813
													17	3	0.223342
													17	4	0.123661
													17	5	0.0499916
													17	6	0.0152602
													17	7	0.00358687
													17	8	0.000655854
													17	9	9.3567e-05
													17	10	1.03774e-05
													17	11	8.85316e-07
													17	12	5.69906e-08
													17	13	2.68318e-09
													17	14	8.78761e-11
													17	15	1.84094e-12
													17	16	2.11317e-14
													18	0	0.0666972
													18	18	1.08847e-17
													18	1	0.196691
													18	2	0.270223
													18	3	0.229688
													18	4	0.135275
													18	5	0.0585751
													18	6	0.0193069
													18	7	0.00494698
													18	8	0.000997359
													18	9	0.000159081
													18	10	2.00702e-05
													18	11	1.99128e-06
													18	12	1.53502e-07
													18	13	9.01076e-09
													18	14	3.90265e-10
													18	15	1.18652e-11
													18	16	2.33165e-13
													18	17	2.54468e-15
													19	0	0.0587663
													19	19	1.29429e-18
													19	1	0.181234
													19	2	0.26148
													19	3	0.234508
													19	4	0.146501
													19	5	0.0676954
													19	6	0.0239762
													19	7	0.0066545
													19	8	0.001467
													19	9	0.00025876
													19	10	3.65999e-05
													19	11	4.14103e-06
													19	12	3.72031e-07
													19	13	2.61921e-08
													19	14	1.41532e-09
													19	15	5.68605e-11
													19	16	1.61633e-12
													19	17	2.99675e-14
													19	18	3.12176e-16
													20	0	0.0495393
													20	20	2.03219e-19
													20	1	0.162005
													20	2	0.24888
													20	3	0.238743
													20	4	0.16032
													20	5	0.0800689
													20	6	0.0308406
													20	7	0.00937421
													20	8	0.0022815
													20	9	0.000448469
													20	10	7.14816e-05
													20	11	9.23745e-06
													20	12	9.63808e-07
													20	13	8.04928e-08
													20	14	5.30557e-09
													20	15	2.70155e-10
													20	16	1.02903e-11
													20	17	2.79044e-13
													20	18	4.96841e-15
													20	19	5.01063e-17
													21	0	0.0382943
													21	21	4.6129e-20
													21	1	0.136476
													21	2	0.22916
													21	3	0.241044
													21	4	0.178121
													21	5	0.0982851
													21	6	0.042015
													21	7	0.0142469
													21	8	0.00389149
													21	9	0.000864552
													21	10	0.000157054
													21	11	2.33664e-05
													21	12	2.84185e-06
													21	13	2.80998e-07
													21	14	2.23724e-08
													21	15	1.41315e-09
													21	16	6.92773e-11
													21	17	2.55151e-12
													21	18	6.71813e-14
													21	19	1.16652e-15
													21	20	1.15308e-17
													22	0	0.0300219
													22	22	9.9648e-21
													22	1	0.115267
													22	2	0.209139
													22	3	0.238477
													22	4	0.191714
													22	5	0.115531
													22	6	0.0541705
													22	7	0.0202454
													22	8	0.00612847
													22	9	0.00151843
													22	10	0.000309888
													22	11	5.22457e-05
													22	12	7.27557e-06
													22	13	8.34195e-07
													22	14	7.82408e-08
													22	15	5.94079e-09
													22	16	3.59581e-10
													22	17	1.69656e-11
													22	18	6.03848e-13
													22	19	1.54271e-14
													22	20	2.61032e-16
													22	21	2.52705e-18
													23	0	0.0227879
													23	23	2.4011e-21
													23	1	0.0947264
													23	2	0.186519
													23	3	0.231408
													23	4	0.202982
													23	5	0.133888
													23	6	0.0689559
													23	7	0.0284199
													23	8	0.00953006
													23	9	0.00262926
													23	10	0.000601097
													23	11	0.000114327
													23	12	1.81115e-05
													23	13	2.3863e-06
													23	14	2.60394e-07
													23	15	2.33621e-08
													23	16	1.70442e-09
													23	17	9.95217e-11
													23	18	4.54636e-12
													23	19	1.57212e-13
													23	20	3.91541e-15
													23	21	6.4816e-17
													23	22	6.16477e-19
													24	0	0.0177255
													24	24	5.3341e-22
													24	1	0.0787451
													24	2	0.166127
													24	3	0.221436
													24	4	0.209297
													24	5	0.149237
													24	6	0.0833807
													24	7	0.0374251
													24	8	0.0137265
													24	9	0.00416229
													24	10	0.00105166
													24	11	0.000222464
													24	12	3.9486e-05
													24	13	5.87969e-06
													24	14	7.32668e-07
													24	15	7.60193e-08
													24	16	6.51572e-09
													24	17	4.56053e-10
													24	18	2.56454e-11
													24	19	1.13227e-12
													24	20	3.79706e-14
													24	21	9.20235e-16
													24	22	1.48785e-17
													24	23	1.3882e-19
													25	0	0.013938
													25	25	1.13976e-22
													25	1	0.0657068
													25	2	0.147456
													25	3	0.209618
													25	4	0.21189
													25	5	0.162071
													25	6	0.0974526
													25	7	0.0472446
													25	8	0.0187903
													25	9	0.00620591
													25	10	0.00171632
													25	11	0.000399641
													25	12	7.85836e-05
													25	13	1.30605e-05
													25	14	1.83245e-06
													25	15	2.16328e-07
													25	16	2.13668e-08
													25	17	1.75085e-09
													25	18	1.17612e-10
													25	19	6.37008e-12
													25	20	2.71794e-13
													25	21	8.83694e-15
													25	22	2.0833e-16
													25	23	3.28832e-18
													25	24	3.00816e-20
													26	0	0.0110005
													26	26	2.40213e-23
													26	1	0.0547961
													26	2	0.130227
													26	3	0.196517
													26	4	0.211411
													26	5	0.17257
													26	6	0.111071
													26	7	0.0578264
													26	8	0.0247873
													26	9	0.00885816
													26	10	0.00266254
													26	11	0.000677142
													26	12	0.000146249
													26	13	2.687e-05
													26	14	4.19885e-06
													26	15	5.56939e-07
													26	16	6.24565e-08
													26	17	5.88507e-09
													26	18	4.6183e-10
													26	19	2.98153e-11
													26	20	1.55706e-12
													26	21	6.42573e-14
													26	22	2.02688e-15
													26	23	4.65024e-17
													26	24	7.16781e-19
													26	25	6.42989e-21
													27	0	0.0105352
													27	27	1.01592e-24
													27	1	0.0529439
													27	2	0.127037
													27	3	0.193713
													27	4	0.210782
													27	5	0.174213
													27	6	0.113672
													27	7	0.0600782
													27	8	0.0261846
													27	9	0.00953185
													27	10	0.00292457
													27	11	0.000761109
													27	12	0.000168702
													27	13	3.19188e-05
													27	14	5.15767e-06
													27	15	7.10965e-07
													27	16	8.33694e-08
													27	17	8.27762e-09
													27	18	6.91192e-10
													27	19	4.80863e-11
													27	20	2.75217e-12
													27	21	1.27392e-13
													27	22	4.65876e-15
													27	23	1.30257e-16
													27	24	2.65317e-18
													27	25	3.64724e-20
													27	26	2.94941e-22
													28	0	0.00796264
													28	28	2.48078e-25
													28	1	0.0425881
													28	2	0.108944
													28	3	0.177431
													28	4	0.206614
													28	5	0.183143
													28	6	0.128456
													28	7	0.0731654
													28	8	0.0344611
													28	9	0.0135983
													28	10	0.004538
													28	11	0.0012894
													28	12	0.000313362
													28	13	6.53199e-05
													28	14	1.16925e-05
													28	15	1.79681e-06
													28	16	2.36622e-07
													28	17	2.66143e-08
													28	18	2.54372e-09
													28	19	2.05126e-10
													28	20	1.38223e-11
													28	21	7.68337e-13
													28	22	3.46289e-14
													28	23	1.23607e-15
													28	24	3.38129e-17
													28	25	6.75445e-19
													28	26	9.12913e-21
													28	27	7.27897e-23
													29	0	0.00691406
													29	29	3.2669e-26
													29	1	0.0380284
													29	2	0.100206
													29	3	0.168412
													29	4	0.202771
													29	5	0.186234
													29	6	0.135657
													29	7	0.0804465
													29	8	0.039558
													29	9	0.0163457
													29	10	0.00573113
													29	11	0.00171721
													29	12	0.000441895
													29	13	9.79841e-05
													29	14	1.87546e-05
													29	15	3.09995e-06
													29	16	4.4208e-07
													29	17	5.42699e-08
													29	18	5.71354e-09
													29	19	5.13092e-10
													29	20	3.90148e-11
													29	21	2.48739e-12
													29	22	1.3125e-13
													29	23	5.63351e-15
													29	24	1.92136e-16
													29	25	5.03926e-18
													29	26	9.6875e-20
													29	27	1.2654e-21
													29	28	9.80095e-24
													30	0	0.00517614
													30	30	8.21168e-27
													30	1	0.0302075
													30	2	0.0845768
													30	3	0.151268
													30	4	0.194134
													30	5	0.19039
													30	6	0.14837
													30	7	0.0943243
													30	8	0.0498357
													30	9	0.0221803
													30	10	0.0083992
													30	11	0.00272615
													30	12	0.000762457
													30	13	0.00018443
													30	14	3.86697e-05
													30	15	7.0349e-06
													30	16	1.11016e-06
													30	17	1.5175e-07
													30	18	1.79187e-08
													30	19	1.82028e-09
													30	20	1.58179e-10
													30	21	1.16689e-11
													30	22	7.23489e-13
													30	23	3.72084e-14
													30	24	1.55988e-15
													30	25	5.2068e-17
													30	26	1.33919e-18
													30	27	2.52978e-20
													30	28	3.25409e-22
													30	29	2.48802e-24
													31	0	0.00491962
													31	31	4.06947e-28
													31	1	0.028967
													31	2	0.0818824
													31	3	0.147963
													31	4	0.19201
													31	5	0.190576
													31	6	0.150453
													31	7	0.0970027
													31	8	0.0520404
													31	9	0.0235508
													31	10	0.00908215
													31	11	0.00300729
													31	12	0.000859772
													31	13	0.000213075
													31	14	4.58932e-05
													31	15	8.60263e-06
													31	16	1.40378e-06
													31	17	1.99246e-07
													31	18	2.45509e-08
													31	19	2.61806e-09
													31	20	2.40548e-10
													31	21	1.89295e-11
													31	22	1.26591e-12
													31	23	7.12184e-14
													31	24	3.32651e-15
													31	25	1.26791e-16
													31	26	3.85316e-18
													31	27	9.04106e-20
													31	28	1.56297e-21
													31	29	1.8491e-23
													31	30	1.31104e-25
													32	0	0.00388408
													32	32	8.56591e-29
													32	1	0.0239052
													32	2	0.0707441
													32	3	0.134053
													32	4	0.182738
													32	5	0.190878
													32	6	0.158898
													32	7	0.108253
													32	8	0.0615046
													32	9	0.0295477
													32	10	0.0121277
													32	11	0.004286
													32	12	0.00131181
													32	13	0.0003492
													32	14	8.10836e-05
													32	15	1.6452e-05
													32	16	2.91908e-06
													32	17	4.5279e-07
													32	18	6.13229e-08
													32	19	7.23476e-09
													32	20	7.40996e-10
													32	21	6.55784e-11
													32	22	4.98397e-12
													32	23	3.22692e-13
													32	24	1.76172e-14
													32	25	8.00308e-16
													32	26	2.97306e-17
													32	27	8.82441e-19
													32	28	2.02647e-20
													32	29	3.43592e-22
													32	30	3.99573e-24
													32	31	2.79176e-26
													33	0	0.00343974
													33	33	9.79948e-30
													33	1	0.0216148
													33	2	0.0653857
													33	3	0.126811
													33	4	0.177169
													33	5	0.189947
													33	6	0.162557
													33	7	0.114047
													33	8	0.0668527
													33	9	0.0332036
													33	10	0.0141206
													33	11	0.00518309
													33	12	0.00165206
													33	13	0.000459323
													33	14	0.000111756
													33	15	2.38459e-05
													33	16	4.46726e-06
													33	17	7.34936e-07
													33	18	1.06107e-07
													33	19	1.34225e-08
													33	20	1.48389e-09
													33	21	1.42847e-10
													33	22	1.1916e-11
													33	23	8.55946e-13
													33	24	5.25181e-14
													33	25	2.72418e-15
													33	26	1.17885e-16
													33	27	4.18269e-18
													33	28	1.18898e-19
													33	29	2.62258e-21
													33	30	4.28458e-23
													33	31	4.81839e-25
													33	32	3.26966e-27
													34	0	0.00258516
													34	34	2.4346e-30
													34	1	0.0170993
													34	2	0.0545112
													34	3	0.11155
													34	4	0.164658
													34	5	0.186772
													34	6	0.169362
													34	7	0.126099
													34	8	0.0785778
													34	9	0.0415634
													34	10	0.0188616
													34	11	0.00740353
													34	12	0.00252931
													34	13	0.000755648
													34	14	0.000198106
													34	15	4.56865e-05
													34	16	9.28172e-06
													34	17	1.6622e-06
													34	18	2.62334e-07
													34	19	3.64492e-08
													34	20	4.44994e-09
													34	21	4.76018e-10
													34	22	4.44447e-11
													34	23	3.60373e-12
													34	24	2.52123e-13
													34	25	1.50951e-14
													34	26	7.65398e-16
													34	27	3.24312e-17
													34	28	1.12851e-18
													34	29	3.15104e-20
													34	30	6.83761e-22
													34	31	1.10068e-23
													34	32	1.22166e-25
													34	33	8.19686e-28
													35	0	0.00218457
													35	35	3.77262e-31
													35	1	0.0148502
													35	2	0.0487139
													35	3	0.102712
													35	4	0.156428
													35	5	0.183345
													35	6	0.172059
													35	7	0.132803
													35	8	0.0859416
													35	9	0.0472991
													35	10	0.0223794
													35	11	0.00917905
													35	12	0.00328461
													35	13	0.00103049
													35	14	0.000284502
													35	15	6.93052e-05
													35	16	1.4923e-05
													35	17	2.84291e-06
													35	18	4.79255e-07
													35	19	7.1452e-08
													35	20	9.40849e-09
													35	21	1.09181e-09
													35	22	1.11321e-10
													35	23	9.93238e-12
													35	24	7.71483e-13
													35	25	5.18246e-14
													35	26	2.9859e-15
													35	27	1.4601e-16
													35	28	5.97912e-18
													35	29	2.015e-19
													35	30	5.4606e-21
													35	31	1.15256e-22
													35	32	1.80883e-24
													35	33	1.96233e-26
													35	34	1.29074e-28
													36	0	0.00193184
													36	36	4.36455e-32
													36	1	0.0133849
													36	2	0.0447962
													36	3	0.0964646
													36	4	0.150214
													36	5	0.180231
													36	6	0.173365
													36	7	0.137345
													36	8	0.091363
													36	9	0.0517697
													36	10	0.0252624
													36	11	0.0107062
													36	12	0.00396654
													36	13	0.00129127
													36	14	0.000370806
													36	15	9.42014e-05
													36	16	2.12145e-05
													36	17	4.24045e-06
													36	18	7.52707e-07
													36	19	1.18631e-07
													36	20	1.65863e-08
													36	21	2.05397e-09
													36	22	2.24754e-10
													36	23	2.1662e-11
													36	24	1.83131e-12
													36	25	1.35082e-13
													36	26	8.63606e-15
													36	27	4.74558e-16
													36	28	2.21794e-17
													36	29	8.69916e-19
													36	30	2.81405e-20
													36	31	7.3366e-22
													36	32	1.49335e-23
													36	33	2.26618e-25
													36	34	2.38437e-27
													36	35	1.52663e-29
													#N/A	#N/A	#N/A
													#N/A	#N/A	#N/A
													#N/A	#N/A	#N/A
													#N/A	#N/A	#N/A
													#N/A	#N/A	#N/A
													#N/A	#N/A	#N/A
													#N/A	#N/A	#N/A
													#N/A	#N/A	#N/A
													#N/A	#N/A	#N/A
													#N/A	#N/A	#N/A
													#N/A	#N/A	#N/A
													#N/A	#N/A	#N/A
													#N/A	#N/A	#N/A
													#N/A	#N/A	#N/A
													#N/A	#N/A	#N/A
													#N/A	#N/A	#N/A
													#N/A	#N/A	#N/A
													#N/A	#N/A	#N/A
													#N/A	#N/A	#N/A
													#N/A	#N/A	#N/A
													#N/A	#N/A	#N/A
													#N/A	#N/A	#N/A
													#N/A	#N/A	#N/A
													#N/A	#N/A	#N/A
													#N/A	#N/A	#N/A
													#N/A	#N/A	#N/A
													#N/A	#N/A	#N/A
													#N/A	#N/A	#N/A
													#N/A	#N/A	#N/A
													#N/A	#N/A	#N/A
													#N/A	#N/A	#N/A
													#N/A	#N/A	#N/A
													#N/A	#N/A	#N/A
													#N/A	#N/A	#N/A
													#N/A	#N/A	#N/A
													#N/A	#N/A	#N/A
													#N/A	#N/A	#N/A
													#N/A	#N/A	#N/A
													#N/A	#N/A	#N/A
													#N/A	#N/A	#N/A
													#N/A	#N/A	#N/A
													#N/A	#N/A	#N/A
													#N/A	#N/A	#N/A
													#N/A	#N/A	#N/A
													#N/A	#N/A	#N/A
													#N/A	#N/A	#N/A
													#N/A	#N/A	#N/A
													#N/A	#N/A	#N/A
													#N/A	#N/A	#N/A
													#N/A	#N/A	#N/A
													#N/A	#N/A	#N/A
													#N/A	#N/A	#N/A
													#N/A	#N/A	#N/A
													#N/A	#N/A	#N/A
													#N/A	#N/A	#N/A
													#N/A	#N/A	#N/A
													#N/A	#N/A	#N/A
													#N/A	#N/A	#N/A
													#N/A	#N/A	#N/A
													#N/A	#N/A	#N/A
													#N/A	#N/A	#N/A
													#N/A	#N/A	#N/A
													#N/A	#N/A	#N/A
													#N/A	#N/A	#N/A
													#N/A	#N/A	#N/A
													#N/A	#N/A	#N/A
													#N/A	#N/A	#N/A
													#N/A	#N/A	#N/A
													#N/A	#N/A	#N/A
													#N/A	#N/A	#N/A
													#N/A	#N/A	#N/A
													#N/A	#N/A	#N/A
													#N/A	#N/A	#N/A
													#N/A	#N/A	#N/A
													#N/A	#N/A	#N/A
													#N/A	#N/A	#N/A
													#N/A	#N/A	#N/A
													#N/A	#N/A	#N/A
													#N/A	#N/A	#N/A
													#N/A	#N/A	#N/A
													#N/A	#N/A	#N/A
													#N/A	#N/A	#N/A
													#N/A	#N/A	#N/A
													#N/A	#N/A	#N/A
													#N/A	#N/A	#N/A
													#N/A	#N/A	#N/A
													#N/A	#N/A	#N/A
													#N/A	#N/A	#N/A
													#N/A	#N/A	#N/A
													#N/A	#N/A	#N/A
													#N/A	#N/A	#N/A
													#N/A	#N/A	#N/A
													#N/A	#N/A	#N/A
													#N/A	#N/A	#N/A
													#N/A	#N/A	#N/A
													#N/A	#N/A	#N/A
													#N/A	#N/A	#N/A
													#N/A	#N/A	#N/A
													#N/A	#N/A	#N/A
													#N/A	#N/A	#N/A
													#N/A	#N/A	#N/A
													#N/A	#N/A	#N/A
													#N/A	#N/A	#N/A
													#N/A	#N/A	#N/A
													#N/A	#N/A	#N/A
													#N/A	#N/A	#N/A
													#N/A	#N/A	#N/A
													#N/A	#N/A	#N/A
													#N/A	#N/A	#N/A
													#N/A	#N/A	#N/A
													#N/A	#N/A	#N/A
													#N/A	#N/A	#N/A
													#N/A	#N/A	#N/A
													#N/A	#N/A	#N/A
													#N/A	#N/A	#N/A
													#N/A	#N/A	#N/A
													#N/A	#N/A	#N/A
													#N/A	#N/A	#N/A
													#N/A	#N/A	#N/A
													#N/A	#N/A	#N/A
													#N/A	#N/A	#N/A
													#N/A	#N/A	#N/A
													#N/A	#N/A	#N/A
													#N/A	#N/A	#N/A
													#N/A	#N/A	#N/A
													#N/A	#N/A	#N/A
													#N/A	#N/A	#N/A
													#N/A	#N/A	#N/A
													#N/A	#N/A	#N/A
													#N/A	#N/A	#N/A
													#N/A	#N/A	#N/A
													#N/A	#N/A	#N/A
													#N/A	#N/A	#N/A
													#N/A	#N/A	#N/A
													#N/A	#N/A	#N/A
													#N/A	#N/A	#N/A
													#N/A	#N/A	#N/A
													#N/A	#N/A	#N/A
													#N/A	#N/A	#N/A
													#N/A	#N/A	#N/A
													#N/A	#N/A	#N/A
													#N/A	#N/A	#N/A
													#N/A	#N/A	#N/A
													#N/A	#N/A	#N/A
													#N/A	#N/A	#N/A
													#N/A	#N/A	#N/A
													#N/A	#N/A	#N/A
													#N/A	#N/A	#N/A
													#N/A	#N/A	#N/A
													#N/A	#N/A	#N/A
													#N/A	#N/A	#N/A
													#N/A	#N/A	#N/A
													#N/A	#N/A	#N/A
													#N/A	#N/A	#N/A
													#N/A	#N/A	#N/A
													#N/A	#N/A	#N/A
													#N/A	#N/A	#N/A
													#N/A	#N/A	#N/A
													#N/A	#N/A	#N/A
													#N/A	#N/A	#N/A
													#N/A	#N/A	#N/A
													#N/A	#N/A	#N/A
													#N/A	#N/A	#N/A
													#N/A	#N/A	#N/A
													#N/A	#N/A	#N/A
													#N/A	#N/A	#N/A
													#N/A	#N/A	#N/A
													#N/A	#N/A	#N/A
													#N/A	#N/A	#N/A
													#N/A	#N/A	#N/A
													#N/A	#N/A	#N/A
													#N/A	#N/A	#N/A
													#N/A	#N/A	#N/A
													#N/A	#N/A	#N/A
													#N/A	#N/A	#N/A
													#N/A	#N/A	#N/A
													#N/A	#N/A	#N/A
													#N/A	#N/A	#N/A
													#N/A	#N/A	#N/A
													#N/A	#N/A	#N/A
													#N/A	#N/A	#N/A
													#N/A	#N/A	#N/A
													#N/A	#N/A	#N/A
													#N/A	#N/A	#N/A
													#N/A	#N/A	#N/A
													#N/A	#N/A	#N/A
													#N/A	#N/A	#N/A
													#N/A	#N/A	#N/A
													#N/A	#N/A	#N/A
													#N/A	#N/A	#N/A
													#N/A	#N/A	#N/A
													#N/A	#N/A	#N/A
													#N/A	#N/A	#N/A
													#N/A	#N/A	#N/A
													#N/A	#N/A	#N/A
													#N/A	#N/A	#N/A
													#N/A	#N/A	#N/A
													#N/A	#N/A	#N/A
													#N/A	#N/A	#N/A
													#N/A	#N/A	#N/A
													#N/A	#N/A	#N/A
													#N/A	#N/A	#N/A
													#N/A	#N/A	#N/A
													#N/A	#N/A	#N/A
													#N/A	#N/A	#N/A
													#N/A	#N/A	#N/A
													#N/A	#N/A	#N/A
													#N/A	#N/A	#N/A
													#N/A	#N/A	#N/A
													#N/A	#N/A	#N/A
													#N/A	#N/A	#N/A
													#N/A	#N/A	#N/A
													#N/A	#N/A	#N/A
													#N/A	#N/A	#N/A
													#N/A	#N/A	#N/A
													#N/A	#N/A	#N/A
													#N/A	#N/A	#N/A
													#N/A	#N/A	#N/A
													#N/A	#N/A	#N/A
													#N/A	#N/A	#N/A
													#N/A	#N/A	#N/A
													#N/A	#N/A	#N/A
													#N/A	#N/A	#N/A
													#N/A	#N/A	#N/A
													#N/A	#N/A	#N/A
													#N/A	#N/A	#N/A
													#N/A	#N/A	#N/A
													#N/A	#N/A	#N/A
													#N/A	#N/A	#N/A
													#N/A	#N/A	#N/A
													#N/A	#N/A	#N/A
													#N/A	#N/A	#N/A
													#N/A	#N/A	#N/A
													#N/A	#N/A	#N/A
													#N/A	#N/A	#N/A
													#N/A	#N/A	#N/A
													#N/A	#N/A	#N/A
													#N/A	#N/A	#N/A
													#N/A	#N/A	#N/A
													#N/A	#N/A	#N/A
													#N/A	#N/A	#N/A
													#N/A	#N/A	#N/A
													#N/A	#N/A	#N/A
													#N/A	#N/A	#N/A
													#N/A	#N/A	#N/A
													#N/A	#N/A	#N/A
													#N/A	#N/A	#N/A
													#N/A	#N/A	#N/A
													#N/A	#N/A	#N/A
													#N/A	#N/A	#N/A
													#N/A	#N/A	#N/A
													#N/A	#N/A	#N/A
													#N/A	#N/A	#N/A
													#N/A	#N/A	#N/A
													#N/A	#N/A	#N/A
													#N/A	#N/A	#N/A
													#N/A	#N/A	#N/A
													#N/A	#N/A	#N/A
													#N/A	#N/A	#N/A
													#N/A	#N/A	#N/A
													#N/A	#N/A	#N/A
													#N/A	#N/A	#N/A
													#N/A	#N/A	#N/A
													#N/A	#N/A	#N/A
													#N/A	#N/A	#N/A
													#N/A	#N/A	#N/A
													#N/A	#N/A	#N/A
													#N/A	#N/A	#N/A
													#N/A	#N/A	#N/A
													#N/A	#N/A	#N/A
													#N/A	#N/A	#N/A
													#N/A	#N/A	#N/A
													#N/A	#N/A	#N/A
													#N/A	#N/A	#N/A
													#N/A	#N/A	#N/A
													#N/A	#N/A	#N/A
													#N/A	#N/A	#N/A
													#N/A	#N/A	#N/A
													#N/A	#N/A	#N/A
													#N/A	#N/A	#N/A
													#N/A	#N/A	#N/A
													#N/A	#N/A	#N/A
													#N/A	#N/A	#N/A
													#N/A	#N/A	#N/A
													#N/A	#N/A	#N/A
													#N/A	#N/A	#N/A
													#N/A	#N/A	#N/A
													#N/A	#N/A	#N/A
													#N/A	#N/A	#N/A
													#N/A	#N/A	#N/A
													#N/A	#N/A	#N/A
													#N/A	#N/A	#N/A
													#N/A	#N/A	#N/A
													#N/A	#N/A	#N/A
													#N/A	#N/A	#N/A
													#N/A	#N/A	#N/A
													#N/A	#N/A	#N/A
													#N/A	#N/A	#N/A
													#N/A	#N/A	#N/A
													#N/A	#N/A	#N/A
													#N/A	#N/A	#N/A
													#N/A	#N/A	#N/A
													#N/A	#N/A	#N/A
													#N/A	#N/A	#N/A
													#N/A	#N/A	#N/A
													#N/A	#N/A	#N/A
													#N/A	#N/A	#N/A
													#N/A	#N/A	#N/A
													#N/A	#N/A	#N/A
													#N/A	#N/A	#N/A
													#N/A	#N/A	#N/A
													#N/A	#N/A	#N/A
													#N/A	#N/A	#N/A
													#N/A	#N/A	#N/A
													#N/A	#N/A	#N/A
													#N/A	#N/A	#N/A
													#N/A	#N/A	#N/A
													#N/A	#N/A	#N/A
													#N/A	#N/A	#N/A
													#N/A	#N/A	#N/A
													#N/A	#N/A	#N/A
													#N/A	#N/A	#N/A
													#N/A	#N/A	#N/A
													#N/A	#N/A	#N/A
													#N/A	#N/A	#N/A
													#N/A	#N/A	#N/A
													#N/A	#N/A	#N/A
													#N/A	#N/A	#N/A
													#N/A	#N/A	#N/A
													#N/A	#N/A	#N/A
													#N/A	#N/A	#N/A
													#N/A	#N/A	#N/A
													#N/A	#N/A	#N/A
													#N/A	#N/A	#N/A
													#N/A	#N/A	#N/A
													#N/A	#N/A	#N/A
													#N/A	#N/A	#N/A
													#N/A	#N/A	#N/A
													#N/A	#N/A	#N/A
													#N/A	#N/A	#N/A
													#N/A	#N/A	#N/A
													#N/A	#N/A	#N/A
													#N/A	#N/A	#N/A
													#N/A	#N/A	#N/A
													#N/A	#N/A	#N/A
													#N/A	#N/A	#N/A
													#N/A	#N/A	#N/A
													#N/A	#N/A	#N/A
													#N/A	#N/A	#N/A
													#N/A	#N/A	#N/A
													#N/A	#N/A	#N/A
													#N/A	#N/A	#N/A
													#N/A	#N/A	#N/A
													#N/A	#N/A	#N/A
													#N/A	#N/A	#N/A
													#N/A	#N/A	#N/A
													#N/A	#N/A	#N/A
													#N/A	#N/A	#N/A
													#N/A	#N/A	#N/A
													#N/A	#N/A	#N/A
													#N/A	#N/A	#N/A
													#N/A	#N/A	#N/A
													#N/A	#N/A	#N/A
													#N/A	#N/A	#N/A
													#N/A	#N/A	#N/A
													#N/A	#N/A	#N/A
													#N/A	#N/A	#N/A
													#N/A	#N/A	#N/A
													#N/A	#N/A	#N/A
													#N/A	#N/A	#N/A
													#N/A	#N/A	#N/A
													#N/A	#N/A	#N/A
													#N/A	#N/A	#N/A
													#N/A	#N/A	#N/A
													#N/A	#N/A	#N/A
													#N/A	#N/A	#N/A
													#N/A	#N/A	#N/A
													#N/A	#N/A	#N/A
													#N/A	#N/A	#N/A
													#N/A	#N/A	#N/A
													#N/A	#N/A	#N/A
													#N/A	#N/A	#N/A
													#N/A	#N/A	#N/A
													#N/A	#N/A	#N/A
													#N/A	#N/A	#N/A
													#N/A	#N/A	#N/A
													#N/A	#N/A	#N/A
													#N/A	#N/A	#N/A
													#N/A	#N/A	#N/A
													#N/A	#N/A	#N/A
													#N/A	#N/A	#N/A
													#N/A	#N/A	#N/A
													#N/A	#N/A	#N/A
													#N/A	#N/A	#N/A
													#N/A	#N/A	#N/A
													#N/A	#N/A	#N/A
													#N/A	#N/A	#N/A
													#N/A	#N/A	#N/A
													#N/A	#N/A	#N/A
													#N/A	#N/A	#N/A
													#N/A	#N/A	#N/A
													#N/A	#N/A	#N/A
													#N/A	#N/A	#N/A
													#N/A	#N/A	#N/A
													#N/A	#N/A	#N/A
													#N/A	#N/A	#N/A
													#N/A	#N/A	#N/A
													#N/A	#N/A	#N/A
													#N/A	#N/A	#N/A
													#N/A	#N/A	#N/A
													#N/A	#N/A	#N/A
													#N/A	#N/A	#N/A
													#N/A	#N/A	#N/A
													#N/A	#N/A	#N/A
													#N/A	#N/A	#N/A
													#N/A	#N/A	#N/A
													#N/A	#N/A	#N/A
													#N/A	#N/A	#N/A
													#N/A	#N/A	#N/A
													#N/A	#N/A	#N/A
													#N/A	#N/A	#N/A
													#N/A	#N/A	#N/A
													#N/A	#N/A	#N/A
													#N/A	#N/A	#N/A
													#N/A	#N/A	#N/A
													#N/A	#N/A	#N/A
													#N/A	#N/A	#N/A
													#N/A	#N/A	#N/A
													#N/A	#N/A	#N/A
													#N/A	#N/A	#N/A
													#N/A	#N/A	#N/A
													#N/A	#N/A	#N/A
													#N/A	#N/A	#N/A
													#N/A	#N/A	#N/A
													#N/A	#N/A	#N/A
													#N/A	#N/A	#N/A
													#N/A	#N/A	#N/A
													#N/A	#N/A	#N/A
													#N/A	#N/A	#N/A
													#N/A	#N/A	#N/A
													#N/A	#N/A	#N/A
													#N/A	#N/A	#N/A
													#N/A	#N/A	#N/A
													#N/A	#N/A	#N/A
													#N/A	#N/A	#N/A
													#N/A	#N/A	#N/A
													#N/A	#N/A	#N/A
													#N/A	#N/A	#N/A
													#N/A	#N/A	#N/A
													#N/A	#N/A	#N/A
													#N/A	#N/A	#N/A
													#N/A	#N/A	#N/A
													#N/A	#N/A	#N/A
													#N/A	#N/A	#N/A
													#N/A	#N/A	#N/A
													#N/A	#N/A	#N/A
													#N/A	#N/A	#N/A
													#N/A	#N/A	#N/A
													#N/A	#N/A	#N/A
													#N/A	#N/A	#N/A
													#N/A	#N/A	#N/A
													#N/A	#N/A	#N/A
													#N/A	#N/A	#N/A
													#N/A	#N/A	#N/A
													#N/A	#N/A	#N/A
													#N/A	#N/A	#N/A
													#N/A	#N/A	#N/A
													#N/A	#N/A	#N/A
													#N/A	#N/A	#N/A
													#N/A	#N/A	#N/A
													#N/A	#N/A	#N/A
													#N/A	#N/A	#N/A
													#N/A	#N/A	#N/A
													#N/A	#N/A	#N/A
													#N/A	#N/A	#N/A
													#N/A	#N/A	#N/A
													#N/A	#N/A	#N/A
													#N/A	#N/A	#N/A
													#N/A	#N/A	#N/A
													#N/A	#N/A	#N/A
													#N/A	#N/A	#N/A
													#N/A	#N/A	#N/A
													#N/A	#N/A	#N/A
													#N/A	#N/A	#N/A
													#N/A	#N/A	#N/A
													#N/A	#N/A	#N/A
													#N/A	#N/A	#N/A
													#N/A	#N/A	#N/A
													#N/A	#N/A	#N/A
													#N/A	#N/A	#N/A
													#N/A	#N/A	#N/A
													#N/A	#N/A	#N/A
													#N/A	#N/A	#N/A
													#N/A	#N/A	#N/A
													#N/A	#N/A	#N/A
													#N/A	#N/A	#N/A
													#N/A	#N/A	#N/A
													#N/A	#N/A	#N/A
													#N/A	#N/A	#N/A
													#N/A	#N/A	#N/A
													#N/A	#N/A	#N/A
													#N/A	#N/A	#N/A
													#N/A	#N/A	#N/A
													#N/A	#N/A	#N/A
													#N/A	#N/A	#N/A
													#N/A	#N/A	#N/A
													#N/A	#N/A	#N/A
													#N/A	#N/A	#N/A
													#N/A	#N/A	#N/A
													#N/A	#N/A	#N/A
													#N/A	#N/A	#N/A
													#N/A	#N/A	#N/A
													#N/A	#N/A	#N/A
													#N/A	#N/A	#N/A
													#N/A	#N/A	#N/A
													#N/A	#N/A	#N/A
													#N/A	#N/A	#N/A
													#N/A	#N/A	#N/A
													#N/A	#N/A	#N/A
													#N/A	#N/A	#N/A
													#N/A	#N/A	#N/A
													#N/A	#N/A	#N/A
													#N/A	#N/A	#N/A
													#N/A	#N/A	#N/A
													#N/A	#N/A	#N/A
													#N/A	#N/A	#N/A
													#N/A	#N/A	#N/A
													#N/A	#N/A	#N/A
													#N/A	#N/A	#N/A
													#N/A	#N/A	#N/A
													#N/A	#N/A	#N/A
													#N/A	#N/A	#N/A
													#N/A	#N/A	#N/A
													#N/A	#N/A	#N/A
													#N/A	#N/A	#N/A
													#N/A	#N/A	#N/A
													#N/A	#N/A	#N/A
													#N/A	#N/A	#N/A
													#N/A	#N/A	#N/A
													#N/A	#N/A	#N/A
													#N/A	#N/A	#N/A
													#N/A	#N/A	#N/A
													#N/A	#N/A	#N/A
													#N/A	#N/A	#N/A
													#N/A	#N/A	#N/A
													#N/A	#N/A	#N/A
													#N/A	#N/A	#N/A
													#N/A	#N/A	#N/A
													#N/A	#N/A	#N/A
													#N/A	#N/A	#N/A
													#N/A	#N/A	#N/A
													#N/A	#N/A	#N/A
													#N/A	#N/A	#N/A
													#N/A	#N/A	#N/A
													#N/A	#N/A	#N/A
													#N/A	#N/A	#N/A
													#N/A	#N/A	#N/A
													#N/A	#N/A	#N/A
													#N/A	#N/A	#N/A
													#N/A	#N/A	#N/A
													#N/A	#N/A	#N/A
													#N/A	#N/A	#N/A
													#N/A	#N/A	#N/A
													#N/A	#N/A	#N/A
													#N/A	#N/A	#N/A
													#N/A	#N/A	#N/A
													#N/A	#N/A	#N/A
													#N/A	#N/A	#N/A
													#N/A	#N/A	#N/A
													#N/A	#N/A	#N/A
													#N/A	#N/A	#N/A
													#N/A	#N/A	#N/A
													#N/A	#N/A	#N/A
													#N/A	#N/A	#N/A
													#N/A	#N/A	#N/A
													#N/A	#N/A	#N/A
													#N/A	#N/A	#N/A
													#N/A	#N/A	#N/A
													#N/A	#N/A	#N/A
													#N/A	#N/A	#N/A
													#N/A	#N/A	#N/A
													#N/A	#N/A	#N/A
													#N/A	#N/A	#N/A
													#N/A	#N/A	#N/A
													#N/A	#N/A	#N/A
													#N/A	#N/A	#N/A
													#N/A	#N/A	#N/A
													#N/A	#N/A	#N/A
													#N/A	#N/A	#N/A
													#N/A	#N/A	#N/A
													#N/A	#N/A	#N/A
													#N/A	#N/A	#N/A
													#N/A	#N/A	#N/A
													#N/A	#N/A	#N/A
													#N/A	#N/A	#N/A
													#N/A	#N/A	#N/A
													#N/A	#N/A	#N/A
													#N/A	#N/A	#N/A
													#N/A	#N/A	#N/A
													#N/A	#N/A	#N/A
													#N/A	#N/A	#N/A
													#N/A	#N/A	#N/A
													#N/A	#N/A	#N/A
													#N/A	#N/A	#N/A
													#N/A	#N/A	#N/A
													#N/A	#N/A	#N/A
													#N/A	#N/A	#N/A
													#N/A	#N/A	#N/A
													#N/A	#N/A	#N/A
													#N/A	#N/A	#N/A
													#N/A	#N/A	#N/A
													#N/A	#N/A	#N/A
													#N/A	#N/A	#N/A
													#N/A	#N/A	#N/A
													#N/A	#N/A	#N/A
													#N/A	#N/A	#N/A
													#N/A	#N/A	#N/A
													#N/A	#N/A	#N/A
													#N/A	#N/A	#N/A
													#N/A	#N/A	#N/A
													#N/A	#N/A	#N/A
													#N/A	#N/A	#N/A
													#N/A	#N/A	#N/A
													#N/A	#N/A	#N/A
													#N/A	#N/A	#N/A
													#N/A	#N/A	#N/A
													#N/A	#N/A	#N/A
													#N/A	#N/A	#N/A
													#N/A	#N/A	#N/A
													#N/A	#N/A	#N/A
													#N/A	#N/A	#N/A
													#N/A	#N/A	#N/A
													#N/A	#N/A	#N/A
													#N/A	#N/A	#N/A
													#N/A	#N/A	#N/A
													#N/A	#N/A	#N/A
													#N/A	#N/A	#N/A
													#N/A	#N/A	#N/A
													#N/A	#N/A	#N/A
													#N/A	#N/A	#N/A
													#N/A	#N/A	#N/A
													#N/A	#N/A	#N/A
													#N/A	#N/A	#N/A
													#N/A	#N/A	#N/A
													#N/A	#N/A	#N/A
													#N/A	#N/A	#N/A
													#N/A	#N/A	#N/A
													#N/A	#N/A	#N/A
													#N/A	#N/A	#N/A
													#N/A	#N/A	#N/A
													#N/A	#N/A	#N/A
													#N/A	#N/A	#N/A
													#N/A	#N/A	#N/A
													#N/A	#N/A	#N/A
													#N/A	#N/A	#N/A
													#N/A	#N/A	#N/A
													#N/A	#N/A	#N/A
													#N/A	#N/A	#N/A
													#N/A	#N/A	#N/A
													#N/A	#N/A	#N/A
													#N/A	#N/A	#N/A
													#N/A	#N/A	#N/A
													#N/A	#N/A	#N/A
													#N/A	#N/A	#N/A
													#N/A	#N/A	#N/A
													#N/A	#N/A	#N/A
													#N/A	#N/A	#N/A
													#N/A	#N/A	#N/A
													#N/A	#N/A	#N/A
													#N/A	#N/A	#N/A
													#N/A	#N/A	#N/A
													#N/A	#N/A	#N/A
													#N/A	#N/A	#N/A
													#N/A	#N/A	#N/A
													#N/A	#N/A	#N/A
													#N/A	#N/A	#N/A
													#N/A	#N/A	#N/A
													#N/A	#N/A	#N/A
													#N/A	#N/A	#N/A
													#N/A	#N/A	#N/A
													#N/A	#N/A	#N/A
													#N/A	#N/A	#N/A
													#N/A	#N/A	#N/A
													#N/A	#N/A	#N/A
													#N/A	#N/A	#N/A
													#N/A	#N/A	#N/A
													#N/A	#N/A	#N/A
													#N/A	#N/A	#N/A
													#N/A	#N/A	#N/A
													#N/A	#N/A	#N/A
													#N/A	#N/A	#N/A
													#N/A	#N/A	#N/A
													#N/A	#N/A	#N/A
													#N/A	#N/A	#N/A
													#N/A	#N/A	#N/A
													#N/A	#N/A	#N/A
													#N/A	#N/A	#N/A
													#N/A	#N/A	#N/A
													#N/A	#N/A	#N/A
													#N/A	#N/A	#N/A
													#N/A	#N/A	#N/A
													#N/A	#N/A	#N/A
													#N/A	#N/A	#N/A
													#N/A	#N/A	#N/A
													#N/A	#N/A	#N/A
													#N/A	#N/A	#N/A
													#N/A	#N/A	#N/A
													#N/A	#N/A	#N/A
													#N/A	#N/A	#N/A
													#N/A	#N/A	#N/A
													#N/A	#N/A	#N/A
													#N/A	#N/A	#N/A
													#N/A	#N/A	#N/A
													#N/A	#N/A	#N/A
													#N/A	#N/A	#N/A
													#N/A	#N/A	#N/A
													#N/A	#N/A	#N/A
													#N/A	#N/A	#N/A
													#N/A	#N/A	#N/A
													#N/A	#N/A	#N/A
													#N/A	#N/A	#N/A
													#N/A	#N/A	#N/A
													#N/A	#N/A	#N/A
													#N/A	#N/A	#N/A
													#N/A	#N/A	#N/A
													#N/A	#N/A	#N/A
													#N/A	#N/A	#N/A
													#N/A	#N/A	#N/A
													#N/A	#N/A	#N/A
													#N/A	#N/A	#N/A
													#N/A	#N/A	#N/A
													#N/A	#N/A	#N/A
													#N/A	#N/A	#N/A
													#N/A	#N/A	#N/A
													#N/A	#N/A	#N/A
													#N/A	#N/A	#N/A
													#N/A	#N/A	#N/A
													#N/A	#N/A	#N/A
													#N/A	#N/A	#N/A
													#N/A	#N/A	#N/A
													#N/A	#N/A	#N/A
													#N/A	#N/A	#N/A
													#N/A	#N/A	#N/A
													#N/A	#N/A	#N/A
													#N/A	#N/A	#N/A
													#N/A	#N/A	#N/A
													#N/A	#N/A	#N/A
													#N/A	#N/A	#N/A
													#N/A	#N/A	#N/A
													#N/A	#N/A	#N/A
													#N/A	#N/A	#N/A
													#N/A	#N/A	#N/A
													#N/A	#N/A	#N/A
													#N/A	#N/A	#N/A
													#N/A	#N/A	#N/A
													#N/A	#N/A	#N/A
													#N/A	#N/A	#N/A
													#N/A	#N/A	#N/A
													#N/A	#N/A	#N/A
													#N/A	#N/A	#N/A
													#N/A	#N/A	#N/A
													#N/A	#N/A	#N/A
													#N/A	#N/A	#N/A
													#N/A	#N/A	#N/A
													#N/A	#N/A	#N/A
													#N/A	#N/A	#N/A
													#N/A	#N/A	#N/A
													#N/A	#N/A	#N/A
													#N/A	#N/A	#N/A
													#N/A	#N/A	#N/A
													#N/A	#N/A	#N/A
													#N/A	#N/A	#N/A
													#N/A	#N/A	#N/A
													#N/A	#N/A	#N/A
													#N/A	#N/A	#N/A
													#N/A	#N/A	#N/A
													#N/A	#N/A	#N/A
													#N/A	#N/A	#N/A
													#N/A	#N/A	#N/A
													#N/A	#N/A	#N/A
													#N/A	#N/A	#N/A
													#N/A	#N/A	#N/A
													#N/A	#N/A	#N/A
													#N/A	#N/A	#N/A
													#N/A	#N/A	#N/A
													#N/A	#N/A	#N/A
													#N/A	#N/A	#N/A
													#N/A	#N/A	#N/A
													#N/A	#N/A	#N/A
													#N/A	#N/A	#N/A
													#N/A	#N/A	#N/A
													#N/A	#N/A	#N/A
													#N/A	#N/A	#N/A
													#N/A	#N/A	#N/A
													#N/A	#N/A	#N/A
													#N/A	#N/A	#N/A
													#N/A	#N/A	#N/A
													#N/A	#N/A	#N/A
													#N/A	#N/A	#N/A
													#N/A	#N/A	#N/A
													#N/A	#N/A	#N/A
													#N/A	#N/A	#N/A
													#N/A	#N/A	#N/A
													#N/A	#N/A	#N/A
													#N/A	#N/A	#N/A
													#N/A	#N/A	#N/A
													#N/A	#N/A	#N/A
													#N/A	#N/A	#N/A
													#N/A	#N/A	#N/A
													#N/A	#N/A	#N/A
													#N/A	#N/A	#N/A
													#N/A	#N/A	#N/A
													#N/A	#N/A	#N/A
													#N/A	#N/A	#N/A
													#N/A	#N/A	#N/A
													#N/A	#N/A	#N/A
													#N/A	#N/A	#N/A
													#N/A	#N/A	#N/A
													#N/A	#N/A	#N/A
													#N/A	#N/A	#N/A
													#N/A	#N/A	#N/A
													#N/A	#N/A	#N/A
													#N/A	#N/A	#N/A
													#N/A	#N/A	#N/A
													#N/A	#N/A	#N/A
													#N/A	#N/A	#N/A
													#N/A	#N/A	#N/A
													#N/A	#N/A	#N/A
													#N/A	#N/A	#N/A
													#N/A	#N/A	#N/A
													#N/A	#N/A	#N/A
													#N/A	#N/A	#N/A
													#N/A	#N/A	#N/A
													#N/A	#N/A	#N/A
													#N/A	#N/A	#N/A
													#N/A	#N/A	#N/A
													#N/A	#N/A	#N/A
													#N/A	#N/A	#N/A
													#N/A	#N/A	#N/A
													#N/A	#N/A	#N/A
													#N/A	#N/A	#N/A
													#N/A	#N/A	#N/A
													#N/A	#N/A	#N/A
													#N/A	#N/A	#N/A
													#N/A	#N/A	#N/A
													#N/A	#N/A	#N/A
													#N/A	#N/A	#N/A
													#N/A	#N/A	#N/A
													#N/A	#N/A	#N/A
													#N/A	#N/A	#N/A
													#N/A	#N/A	#N/A
													#N/A	#N/A	#N/A
													#N/A	#N/A	#N/A
													#N/A	#N/A	#N/A
													#N/A	#N/A	#N/A
													#N/A	#N/A	#N/A
													#N/A	#N/A	#N/A
													#N/A	#N/A	#N/A
													#N/A	#N/A	#N/A
													#N/A	#N/A	#N/A
													#N/A	#N/A	#N/A
													#N/A	#N/A	#N/A
													#N/A	#N/A	#N/A
													#N/A	#N/A	#N/A
													#N/A	#N/A	#N/A
													#N/A	#N/A	#N/A
													#N/A	#N/A	#N/A
													#N/A	#N/A	#N/A
													#N/A	#N/A	#N/A
													#N/A	#N/A	#N/A
													#N/A	#N/A	#N/A
													#N/A	#N/A	#N/A
													#N/A	#N/A	#N/A
													#N/A	#N/A	#N/A
													#N/A	#N/A	#N/A
													#N/A	#N/A	#N/A
													#N/A	#N/A	#N/A
													#N/A	#N/A	#N/A
													#N/A	#N/A	#N/A
													#N/A	#N/A	#N/A
													#N/A	#N/A	#N/A
													#N/A	#N/A	#N/A
													#N/A	#N/A	#N/A
													#N/A	#N/A	#N/A
													#N/A	#N/A	#N/A
													#N/A	#N/A	#N/A
													#N/A	#N/A	#N/A
													#N/A	#N/A	#N/A
													#N/A	#N/A	#N/A
													#N/A	#N/A	#N/A
													#N/A	#N/A	#N/A
													#N/A	#N/A	#N/A
													#N/A	#N/A	#N/A
													#N/A	#N/A	#N/A
													#N/A	#N/A	#N/A
													#N/A	#N/A	#N/A
													#N/A	#N/A	#N/A
													#N/A	#N/A	#N/A
													#N/A	#N/A	#N/A
													#N/A	#N/A	#N/A
													#N/A	#N/A	#N/A
													#N/A	#N/A	#N/A
													#N/A	#N/A	#N/A
													#N/A	#N/A	#N/A
													#N/A	#N/A	#N/A
													#N/A	#N/A	#N/A
													#N/A	#N/A	#N/A
													#N/A	#N/A	#N/A
													#N/A	#N/A	#N/A
													#N/A	#N/A	#N/A
													#N/A	#N/A	#N/A
													#N/A	#N/A	#N/A
													#N/A	#N/A	#N/A
													#N/A	#N/A	#N/A
													#N/A	#N/A	#N/A
													#N/A	#N/A	#N/A
													#N/A	#N/A	#N/A
													#N/A	#N/A	#N/A
													#N/A	#N/A	#N/A
													#N/A	#N/A	#N/A
													#N/A	#N/A	#N/A
													#N/A	#N/A	#N/A
													#N/A	#N/A	#N/A
													#N/A	#N/A	#N/A
													#N/A	#N/A	#N/A
													#N/A	#N/A	#N/A
													#N/A	#N/A	#N/A
													#N/A	#N/A	#N/A
													#N/A	#N/A	#N/A
													#N/A	#N/A	#N/A
													#N/A	#N/A	#N/A
													#N/A	#N/A	#N/A
													#N/A	#N/A	#N/A
													#N/A	#N/A	#N/A
													#N/A	#N/A	#N/A
													#N/A	#N/A	#N/A
													#N/A	#N/A	#N/A
													#N/A	#N/A	#N/A
													#N/A	#N/A	#N/A
													#N/A	#N/A	#N/A
													#N/A	#N/A	#N/A
													#N/A	#N/A	#N/A
													#N/A	#N/A	#N/A
													#N/A	#N/A	#N/A
													#N/A	#N/A	#N/A
													#N/A	#N/A	#N/A
													#N/A	#N/A	#N/A
													#N/A	#N/A	#N/A
													#N/A	#N/A	#N/A
													#N/A	#N/A	#N/A
													#N/A	#N/A	#N/A
													#N/A	#N/A	#N/A
													#N/A	#N/A	#N/A
													#N/A	#N/A	#N/A
													#N/A	#N/A	#N/A
													#N/A	#N/A	#N/A
													#N/A	#N/A	#N/A
													#N/A	#N/A	#N/A
													#N/A	#N/A	#N/A
													#N/A	#N/A	#N/A
													#N/A	#N/A	#N/A
													#N/A	#N/A	#N/A
													#N/A	#N/A	#N/A
													#N/A	#N/A	#N/A
													#N/A	#N/A	#N/A
													#N/A	#N/A	#N/A
													#N/A	#N/A	#N/A
													#N/A	#N/A	#N/A
													#N/A	#N/A	#N/A
													#N/A	#N/A	#N/A
													#N/A	#N/A	#N/A
													#N/A	#N/A	#N/A
													#N/A	#N/A	#N/A
													#N/A	#N/A	#N/A
													#N/A	#N/A	#N/A
													#N/A	#N/A	#N/A
													#N/A	#N/A	#N/A
													#N/A	#N/A	#N/A
													#N/A	#N/A	#N/A
													#N/A	#N/A	#N/A
													#N/A	#N/A	#N/A
													#N/A	#N/A	#N/A
													#N/A	#N/A	#N/A
													#N/A	#N/A	#N/A
													#N/A	#N/A	#N/A
													#N/A	#N/A	#N/A
													#N/A	#N/A	#N/A
													#N/A	#N/A	#N/A
													#N/A	#N/A	#N/A
													#N/A	#N/A	#N/A
													#N/A	#N/A	#N/A
													#N/A	#N/A	#N/A
													#N/A	#N/A	#N/A
													#N/A	#N/A	#N/A
													#N/A	#N/A	#N/A
													#N/A	#N/A	#N/A
													#N/A	#N/A	#N/A
													#N/A	#N/A	#N/A
													#N/A	#N/A	#N/A
													#N/A	#N/A	#N/A
													#N/A	#N/A	#N/A
													#N/A	#N/A	#N/A
													#N/A	#N/A	#N/A
													#N/A	#N/A	#N/A
													#N/A	#N/A	#N/A
													#N/A	#N/A	#N/A
													#N/A	#N/A	#N/A
													#N/A	#N/A	#N/A
													#N/A	#N/A	#N/A
													#N/A	#N/A	#N/A
													#N/A	#N/A	#N/A
													#N/A	#N/A	#N/A
													#N/A	#N/A	#N/A
													#N/A	#N/A	#N/A
													#N/A	#N/A	#N/A
													#N/A	#N/A	#N/A
													#N/A	#N/A	#N/A
													#N/A	#N/A	#N/A
													#N/A	#N/A	#N/A
													#N/A	#N/A	#N/A
													#N/A	#N/A	#N/A
													#N/A	#N/A	#N/A
													#N/A	#N/A	#N/A
													#N/A	#N/A	#N/A
													#N/A	#N/A	#N/A
													#N/A	#N/A	#N/A
													#N/A	#N/A	#N/A
													#N/A	#N/A	#N/A
													#N/A	#N/A	#N/A
													#N/A	#N/A	#N/A
													#N/A	#N/A	#N/A
													#N/A	#N/A	#N/A
													#N/A	#N/A	#N/A
													#N/A	#N/A	#N/A
													#N/A	#N/A	#N/A
													#N/A	#N/A	#N/A
													#N/A	#N/A	#N/A
													#N/A	#N/A	#N/A
													#N/A	#N/A	#N/A
													#N/A	#N/A	#N/A
													#N/A	#N/A	#N/A
													#N/A	#N/A	#N/A
													#N/A	#N/A	#N/A
													#N/A	#N/A	#N/A
													#N/A	#N/A	#N/A
													#N/A	#N/A	#N/A
													#N/A	#N/A	#N/A
													#N/A	#N/A	#N/A
													#N/A	#N/A	#N/A
													#N/A	#N/A	#N/A
													#N/A	#N/A	#N/A
													#N/A	#N/A	#N/A
													#N/A	#N/A	#N/A
													#N/A	#N/A	#N/A
													#N/A	#N/A	#N/A
													#N/A	#N/A	#N/A
													#N/A	#N/A	#N/A
													#N/A	#N/A	#N/A
													#N/A	#N/A	#N/A
													#N/A	#N/A	#N/A
													#N/A	#N/A	#N/A
													#N/A	#N/A	#N/A
													#N/A	#N/A	#N/A
													#N/A	#N/A	#N/A
													#N/A	#N/A	#N/A
													#N/A	#N/A	#N/A
													#N/A	#N/A	#N/A
													#N/A	#N/A	#N/A
													#N/A	#N/A	#N/A
													#N/A	#N/A	#N/A
													#N/A	#N/A	#N/A
													#N/A	#N/A	#N/A
													#N/A	#N/A	#N/A
													#N/A	#N/A	#N/A
													#N/A	#N/A	#N/A
													#N/A	#N/A	#N/A
													#N/A	#N/A	#N/A
													#N/A	#N/A	#N/A
													#N/A	#N/A	#N/A
													#N/A	#N/A	#N/A
													#N/A	#N/A	#N/A
													#N/A	#N/A	#N/A
													#N/A	#N/A	#N/A
													#N/A	#N/A	#N/A
													#N/A	#N/A	#N/A
													#N/A	#N/A	#N/A
													#N/A	#N/A	#N/A
													#N/A	#N/A	#N/A
													#N/A	#N/A	#N/A
													#N/A	#N/A	#N/A
													#N/A	#N/A	#N/A
													#N/A	#N/A	#N/A
													#N/A	#N/A	#N/A
													#N/A	#N/A	#N/A
													#N/A	#N/A	#N/A
													#N/A	#N/A	#N/A
													#N/A	#N/A	#N/A
													#N/A	#N/A	#N/A
													#N/A	#N/A	#N/A
													#N/A	#N/A	#N/A
													#N/A	#N/A	#N/A
													#N/A	#N/A	#N/A
													#N/A	#N/A	#N/A
													#N/A	#N/A	#N/A
													#N/A	#N/A	#N/A
													#N/A	#N/A	#N/A
													#N/A	#N/A	#N/A
													#N/A	#N/A	#N/A
													#N/A	#N/A	#N/A
													#N/A	#N/A	#N/A
													#N/A	#N/A	#N/A
													#N/A	#N/A	#N/A
													#N/A	#N/A	#N/A
													#N/A	#N/A	#N/A
													#N/A	#N/A	#N/A
													#N/A	#N/A	#N/A
													#N/A	#N/A	#N/A
													#N/A	#N/A	#N/A
													#N/A	#N/A	#N/A
													#N/A	#N/A	#N/A
													#N/A	#N/A	#N/A
													#N/A	#N/A	#N/A
													#N/A	#N/A	#N/A
													#N/A	#N/A	#N/A
													#N/A	#N/A	#N/A
													#N/A	#N/A	#N/A
													#N/A	#N/A	#N/A
													#N/A	#N/A	#N/A
													#N/A	#N/A	#N/A
													#N/A	#N/A	#N/A
													#N/A	#N/A	#N/A
													#N/A	#N/A	#N/A
													#N/A	#N/A	#N/A
													#N/A	#N/A	#N/A
													#N/A	#N/A	#N/A
													#N/A	#N/A	#N/A
													#N/A	#N/A	#N/A
													#N/A	#N/A	#N/A
													#N/A	#N/A	#N/A
													#N/A	#N/A	#N/A
													#N/A	#N/A	#N/A
													#N/A	#N/A	#N/A
													#N/A	#N/A	#N/A
													#N/A	#N/A	#N/A
													#N/A	#N/A	#N/A
													#N/A	#N/A	#N/A
													#N/A	#N/A	#N/A
													#N/A	#N/A	#N/A
													#N/A	#N/A	#N/A
													#N/A	#N/A	#N/A
													#N/A	#N/A	#N/A
													#N/A	#N/A	#N/A
													#N/A	#N/A	#N/A
													#N/A	#N/A	#N/A
													#N/A	#N/A	#N/A
													#N/A	#N/A	#N/A
													#N/A	#N/A	#N/A
													#N/A	#N/A	#N/A
													#N/A	#N/A	#N/A
													#N/A	#N/A	#N/A
													#N/A	#N/A	#N/A
													#N/A	#N/A	#N/A
													#N/A	#N/A	#N/A
													#N/A	#N/A	#N/A
													#N/A	#N/A	#N/A
													#N/A	#N/A	#N/A
													#N/A	#N/A	#N/A
													#N/A	#N/A	#N/A
													#N/A	#N/A	#N/A
													#N/A	#N/A	#N/A
													#N/A	#N/A	#N/A
													#N/A	#N/A	#N/A
													#N/A	#N/A	#N/A
													#N/A	#N/A	#N/A
													#N/A	#N/A	#N/A
													#N/A	#N/A	#N/A
													#N/A	#N/A	#N/A
													#N/A	#N/A	#N/A
													#N/A	#N/A	#N/A
													#N/A	#N/A	#N/A
													#N/A	#N/A	#N/A
													#N/A	#N/A	#N/A
													#N/A	#N/A	#N/A
													#N/A	#N/A	#N/A
													#N/A	#N/A	#N/A
													#N/A	#N/A	#N/A
													#N/A	#N/A	#N/A
													#N/A	#N/A	#N/A
													#N/A	#N/A	#N/A
													#N/A	#N/A	#N/A
													#N/A	#N/A	#N/A
													#N/A	#N/A	#N/A
													#N/A	#N/A	#N/A
													#N/A	#N/A	#N/A
													#N/A	#N/A	#N/A
													#N/A	#N/A	#N/A
													#N/A	#N/A	#N/A
													#N/A	#N/A	#N/A
													#N/A	#N/A	#N/A
													#N/A	#N/A	#N/A
													#N/A	#N/A	#N/A
													#N/A	#N/A	#N/A
													#N/A	#N/A	#N/A
													#N/A	#N/A	#N/A
													#N/A	#N/A	#N/A
													#N/A	#N/A	#N/A
													#N/A	#N/A	#N/A
													#N/A	#N/A	#N/A
													#N/A	#N/A	#N/A
													#N/A	#N/A	#N/A
													#N/A	#N/A	#N/A
													#N/A	#N/A	#N/A
													#N/A	#N/A	#N/A
													#N/A	#N/A	#N/A
													#N/A	#N/A	#N/A
													#N/A	#N/A	#N/A
													#N/A	#N/A	#N/A
													#N/A	#N/A	#N/A
													#N/A	#N/A	#N/A
													#N/A	#N/A	#N/A
													#N/A	#N/A	#N/A
													#N/A	#N/A	#N/A
													#N/A	#N/A	#N/A
													#N/A	#N/A	#N/A
													#N/A	#N/A	#N/A
													#N/A	#N/A	#N/A
													#N/A	#N/A	#N/A
													#N/A	#N/A	#N/A
													#N/A	#N/A	#N/A
													#N/A	#N/A	#N/A
													#N/A	#N/A	#N/A
													#N/A	#N/A	#N/A
													#N/A	#N/A	#N/A
													#N/A	#N/A	#N/A
													#N/A	#N/A	#N/A
													#N/A	#N/A	#N/A
													#N/A	#N/A	#N/A
													#N/A	#N/A	#N/A
													#N/A	#N/A	#N/A
													#N/A	#N/A	#N/A
													#N/A	#N/A	#N/A
													#N/A	#N/A	#N/A
													#N/A	#N/A	#N/A
													#N/A	#N/A	#N/A
													#N/A	#N/A	#N/A
													#N/A	#N/A	#N/A
													#N/A	#N/A	#N/A
													#N/A	#N/A	#N/A
													#N/A	#N/A	#N/A
													#N/A	#N/A	#N/A
													#N/A	#N/A	#N/A
													#N/A	#N/A	#N/A
													#N/A	#N/A	#N/A
													#N/A	#N/A	#N/A
													#N/A	#N/A	#N/A
													#N/A	#N/A	#N/A
													#N/A	#N/A	#N/A
													#N/A	#N/A	#N/A
													#N/A	#N/A	#N/A
													#N/A	#N/A	#N/A
													#N/A	#N/A	#N/A
													#N/A	#N/A	#N/A
													#N/A	#N/A	#N/A
													#N/A	#N/A	#N/A
													#N/A	#N/A	#N/A
													#N/A	#N/A	#N/A
													#N/A	#N/A	#N/A
													#N/A	#N/A	#N/A
													#N/A	#N/A	#N/A
													#N/A	#N/A	#N/A
													#N/A	#N/A	#N/A
													#N/A	#N/A	#N/A
													#N/A	#N/A	#N/A
													#N/A	#N/A	#N/A
													#N/A	#N/A	#N/A
													#N/A	#N/A	#N/A
													#N/A	#N/A	#N/A
													#N/A	#N/A	#N/A
													#N/A	#N/A	#N/A
													#N/A	#N/A	#N/A
													#N/A	#N/A	#N/A
													#N/A	#N/A	#N/A
													#N/A	#N/A	#N/A
													#N/A	#N/A	#N/A
													#N/A	#N/A	#N/A
													#N/A	#N/A	#N/A
													#N/A	#N/A	#N/A
													#N/A	#N/A	#N/A
													#N/A	#N/A	#N/A
													#N/A	#N/A	#N/A
													#N/A	#N/A	#N/A
													#N/A	#N/A	#N/A
													#N/A	#N/A	#N/A
													#N/A	#N/A	#N/A
													#N/A	#N/A	#N/A
													#N/A	#N/A	#N/A
													#N/A	#N/A	#N/A
[truncated: 1,046,576+ more rows]

## Sheet: Sheet1
	0	1	2	3	4	5	6	7	8	9	10	11	12	13	14	15	16	17	18	19	20
0	1	0.868025	0.77185	0.625972	0.619709	0.565731	0.445531	0.352183	0.264327	0.231246	0.225147	0.195498	0.16542	0.136796	0.11632	0.0989068	0.0883842	0.0754932	0.0666972	0.0587663	0.0495393
1		0.114557	0.19804	0.306489	0.309685	0.336689	0.385353	0.397962	0.386542	0.371247	0.367554	0.348801	0.325215	0.297564	0.2735	0.24997	0.233898	0.212675	0.196691	0.181234	0.162005
2			0.0126927	0.0477228	0.0503119	0.0729039	0.12895	0.182672	0.236378	0.255171	0.258233	0.272629	0.284348	0.29142	0.292339	0.289519	0.285312	0.277813	0.270223	0.26148	0.24888
3				0.00239889	0.00285237	0.00698621	0.0209916	0.0436111	0.0783013	0.0980848	0.102228	0.122772	0.145828	0.169798	0.188002	0.203622	0.21276	0.223342	0.229688	0.234508	0.238743
4					0.00239889	0.000270359	0.00169726	0.00573984	0.0151872	0.023086	0.0250642	0.0352258	0.048695	0.065503	0.0811139	0.0971151	0.108446	0.123661	0.135275	0.146501	0.16032
5						0.00239889	5.90892e-05	0.000402321	0.00173382	0.00341753	0.00393631	0.00671861	0.0111045	0.0176092	0.024778	0.0332115	0.0400101	0.0499916	0.0585751	0.0676954	0.0800689
6							0.00239889	1.27315e-05	0.000109919	0.000313152	0.000395034	0.000861379	0.00176252	0.00337907	0.00550905	0.00839362	0.011034	0.0152602	0.0193069	0.0239762	0.0308406
7								0.00239889	3.24587e-06	1.65961e-05	2.44181e-05	7.32239e-05	0.000194483	0.000465819	0.000901878	0.00159157	0.00231524	0.00358687	0.00494698	0.0066545	0.00937421
8									0.00239889	4.26534e-07	8.53028e-07	3.95627e-06	1.46132e-05	4.57381e-05	0.000108616	0.000227368	0.000372504	0.000655854	0.000997359	0.001467	0.0022815
9										0.00239889	1.40793e-08	1.24559e-07	7.14075e-07	3.1192e-06	9.49845e-06	2.43364e-05	4.59367e-05	9.3567e-05	0.000159081	0.00025876	0.000448469
10											0.00239889	1.92063e-09	2.07887e-08	1.40756e-07	5.86574e-07	1.92068e-06	4.30547e-06	1.03774e-05	2.00702e-05	3.65999e-05	7.14816e-05
11												0.00239889	3.04031e-10	3.84873e-09	2.43412e-08	1.08507e-07	3.01303e-07	8.85316e-07	1.99128e-06	4.14103e-06	9.23745e-06
12													0.00239889	5.3894e-11	6.21911e-10	4.17269e-09	1.52728e-08	5.69906e-08	1.53502e-07	3.72031e-07	9.63808e-07
13														0.00239889	8.29539e-12	1.00154e-10	5.33426e-10	2.68318e-09	9.01076e-09	2.61921e-08	8.04928e-08
14															0.00239889	1.27602e-12	1.17955e-11	8.78761e-11	3.90265e-10	1.41532e-09	5.30557e-09
15																0.00239889	1.41134e-13	1.84094e-12	1.18652e-11	5.68605e-11	2.70155e-10
16																	0.00239889	2.11317e-14	2.33165e-13	1.61633e-12	1.02903e-11
17																		0.00239889	2.54468e-15	2.99675e-14	2.79044e-13
18																			0.00239889	3.12176e-16	4.96841e-15
19																				0.00239889	5.01063e-17
20																					0.00239889
