# Supplementary material for: Probabilistic En Route Sector Traffic Demand Prediction Based upon Statistical Analysis of Error Distribution Characteristics
Source: Hindawi journal article supplement (doi:10.1155/2018/8184513), 2018-08-13
Supplement: f1 [file 8184513.f1.rar › Fig.9.xlsx]

## Sheet: AR01 Correlation Test
	AR01				xi-xjun	yi-yjun	Multiply	Sum Multiply	(xi-xjun)2	Sum (xi-xjun)2	(yi-yjun)2	Sum (yi-yjun)2	Sum x*y	Sqrt (sum x*y)	Divide
	probabilistic value	actual value
07:00-07:14	2	2	1.22	1.22	0.78	0.78	0.6084	4.5556	0.6084	7.5556	0.6084	5.5556	41.9759	6.47888	0.703146
07:15-07:29	2	2	1.22	1.22	0.78	0.78	0.6084		0.6084		0.6084
07:30-07:44	0	0	1.22	1.22	-1.22	-1.22	1.4884		1.4884		1.4884
07:45-07:59	2	1	1.22	1.22	0.78	-0.22	-0.1716		0.6084		0.0484
08:00-08:14	1	2	1.22	1.22	-0.22	0.78	-0.1716		0.0484		0.6084
08:15-08:29	0	1	1.22	1.22	-1.22	-0.22	0.2684		1.4884		0.0484
08:30-08:44	0	0	1.22	1.22	-1.22	-1.22	1.4884		1.4884		1.4884
08:45-08:59	2	1	1.22	1.22	0.78	-0.22	-0.1716		0.6084		0.0484
09:00-09:14	2	2	1.22	1.22	0.78	0.78	0.6084		0.6084		0.6084
09:15-09:29	4	4	2.46	2.46	1.54	1.54	2.3716	27.7276	2.3716	28.7276	2.3716	30.7276	882.73	29.7108	0.933251
09:30-09:44	5	6	2.46	2.46	2.54	3.54	8.9916		6.4516		12.5316
09:45-09:59	3	3	2.46	2.46	0.54	0.54	0.2916		0.2916		0.2916
10:00-10:14	3	2	2.46	2.46	0.54	-0.46	-0.2484		0.2916		0.2116
10:15-10:29	0	1	2.46	2.46	-2.46	-1.46	3.5916		6.0516		2.1316
10:30-10:44	3	3	2.46	2.46	0.54	0.54	0.2916		0.2916		0.2916
10:45-10:59	3	3	2.46	2.46	0.54	0.54	0.2916		0.2916		0.2916
11:00-11:14	3	2	2.46	2.46	0.54	-0.46	-0.2484		0.2916		0.2116
11:15-11:29	3	3	2.46	2.46	0.54	0.54	0.2916		0.2916		0.2916
11:30-11:44	0	0	2.46	2.46	-2.46	-2.46	6.0516		6.0516		6.0516
11:45-11:59	0	0	2.46	2.46	-2.46	-2.46	6.0516		6.0516		6.0516
	AR01
	probabilistic value	actual value
07:00-07:14	2	2	1.9	1.9	0.1	0.1	0.01	39.8	0.01	43.8	0.01	43.8	1918.44	43.8	0.908676
07:15-07:29	2	2	1.9	1.9	0.1	0.1	0.01		0.01		0.01
07:30-07:44	0	0	1.9	1.9	-1.9	-1.9	3.61		3.61		3.61
07:45-07:59	2	1	1.9	1.9	0.1	-0.9	-0.09		0.01		0.81
08:00-08:14	1	2	1.9	1.9	-0.9	0.1	-0.09		0.81		0.01
08:15-08:29	0	1	1.9	1.9	-1.9	-0.9	1.71		3.61		0.81
08:30-08:44	0	0	1.9	1.9	-1.9	-1.9	3.61		3.61		3.61
08:45-08:59	2	1	1.9	1.9	0.1	-0.9	-0.09		0.01		0.81
09:00-09:14	2	2	1.9	1.9	0.1	0.1	0.01		0.01		0.01
09:15-09:29	4	4	1.9	1.9	2.1	2.1	4.41		4.41		4.41
09:30-09:44	5	6	1.9	1.9	3.1	4.1	12.71		9.61		16.81
09:45-09:59	3	3	1.9	1.9	1.1	1.1	1.21		1.21		1.21
10:00-10:14	3	2	1.9	1.9	1.1	0.1	0.11		1.21		0.01
10:15-10:29	0	1	1.9	1.9	-1.9	-0.9	1.71		3.61		0.81
10:30-10:44	3	3	1.9	1.9	1.1	1.1	1.21		1.21		1.21
10:45-10:59	3	3	1.9	1.9	1.1	1.1	1.21		1.21		1.21
11:00-11:14	3	2	1.9	1.9	1.1	0.1	0.11		1.21		0.01
11:15-11:29	3	3	1.9	1.9	1.1	1.1	1.21		1.21		1.21
11:30-11:44	0	0	1.9	1.9	-1.9	-1.9	3.61		3.61		3.61
11:45-11:59	0	0	1.9	1.9	-1.9	-1.9	3.61		3.61		3.61

## Sheet: AR02 Correlation Test
	AR02				xi-xjun	yi-yjun	Multiply	Sum Multiply	(xi-xjun)2	(xi-xjun)2的合	(yi-yjun)2	Sum (yi-yjun)2	Sum x*y	Sqrt (sum x*y)	Divide
	probabilistic value	actual value
07:00-07:14	0	0	3.25	3	-3.25	-3	9.75	36	10.5625	39.5	9	34	1343	36.647	0.982346
07:15-07:29	1	1	3.25	3	-2.25	-2	4.5		5.0625		4
07:30-07:44	2	2	3.25	3	-1.25	-1	1.25		1.5625		1
07:45-07:59	3	2	3.25	3	-0.25	-1	0.25		0.0625		1
08:00-08:14	3	3	3.25	3	-0.25	0	0		0.0625		0
08:15-08:29	4	4	3.25	3	0.75	1	0.75		0.5625		1
08:30-08:44	6	6	3.25	3	2.75	3	8.25		7.5625		9
08:45-08:59	7	6	3.25	3	3.75	3	11.25		14.0625		9
09:00-09:14	6	6	9.08	8.75	-3.08	-2.75	8.47	25.25	9.4864	28.9168	7.5625	26.25	759.066	27.5512	0.916477
09:15-09:29	8	8	9.08	8.75	-1.08	-0.75	0.81		1.1664		0.5625
09:30-09:44	9	9	9.08	8.75	-0.08	0.25	-0.02		0.0064		0.0625
09:45-09:59	9	8	9.08	8.75	-0.08	-0.75	0.06		0.0064		0.5625
10:00-10:14	11	11	9.08	8.75	1.92	2.25	4.32		3.6864		5.0625
10:15-10:29	7	7	9.08	8.75	-2.08	-1.75	3.64		4.3264		3.0625
10:30-10:44	10	10	9.08	8.75	0.92	1.25	1.15		0.8464		1.5625
10:45-10:59	9	9	9.08	8.75	-0.08	0.25	-0.02		0.0064		0.0625
11:00-11:14	10	8	9.08	8.75	0.92	-0.75	-0.69		0.8464		0.5625
11:15-11:29	11	11	9.08	8.75	1.92	2.25	4.32		3.6864		5.0625
11:30-11:44	8	8	9.08	8.75	-1.08	-0.75	0.81		1.1664		0.5625
11:45-11:59	11	10	9.08	8.75	1.92	1.25	2.4		3.6864		1.5625
	AR02				xi-xjun	yi-yjun	Multiply	Sum Multiply	(xi-xjun)2	(xi-xjun)2的合	(yi-yjun)2	Sum (yi-yjun)2	Sum x*y	Sqrt (sum x*y)	Divide
	probabilistic value	actual value
07:00-07:14	0	0	6.75	6.45	-6.75	-6.45	43.5375	222.25	45.5625	231.75	41.6025	218.95	50741.7	225.259	0.986642
07:15-07:29	1	1	6.75	6.45	-5.75	-5.45	31.3375		33.0625		29.7025
07:30-07:44	2	2	6.75	6.45	-4.75	-4.45	21.1375		22.5625		19.8025
07:45-07:59	3	2	6.75	6.45	-3.75	-4.45	16.6875		14.0625		19.8025
08:00-08:14	3	3	6.75	6.45	-3.75	-3.45	12.9375		14.0625		11.9025
08:15-08:29	4	4	6.75	6.45	-2.75	-2.45	6.7375		7.5625		6.0025
08:30-08:44	6	6	6.75	6.45	-0.75	-0.45	0.3375		0.5625		0.2025
08:45-08:59	7	6	6.75	6.45	0.25	-0.45	-0.1125		0.0625		0.2025
09:00-09:14	6	6	6.75	6.45	-0.75	-0.45	0.3375		0.5625		0.2025
09:15-09:29	8	8	6.75	6.45	1.25	1.55	1.9375		1.5625		2.4025
09:30-09:44	9	9	6.75	6.45	2.25	2.55	5.7375		5.0625		6.5025
09:45-09:59	9	8	6.75	6.45	2.25	1.55	3.4875		5.0625		2.4025
10:00-10:14	11	11	6.75	6.45	4.25	4.55	19.3375		18.0625		20.7025
10:15-10:29	7	7	6.75	6.45	0.25	0.55	0.1375		0.0625		0.3025
10:30-10:44	10	10	6.75	6.45	3.25	3.55	11.5375		10.5625		12.6025
10:45-10:59	9	9	6.75	6.45	2.25	2.55	5.7375		5.0625		6.5025
11:00-11:14	10	8	6.75	6.45	3.25	1.55	5.0375		10.5625		2.4025
11:15-11:29	11	11	6.75	6.45	4.25	4.55	19.3375		18.0625		20.7025
11:30-11:44	8	8	6.75	6.45	1.25	1.55	1.9375		1.5625		2.4025
11:45-11:59	11	10	6.75	6.45	4.25	3.55	15.0875		18.0625		12.6025

## Sheet: AR03 Correlation Test
	AR03				xi-xjun	yi-yjun	Multiply	Sum Multiply	(xi-xjun)2	(xi-xjun)2的合	(yi-yjun)2	Sum (yi-yjun)2	Sum x*y	Sqrt (sum x*y)	Divide
	probabilistic value	actual value
07:00-07:14	2	1	9.65	9.45	-7.65	-8.45	64.6425	318.15	58.5225	320.55	71.4025	320.95	102881	320.75	0.991894
07:15-07:29	5	5	9.65	9.45	-4.65	-4.45	20.6925		21.6225		19.8025
07:30-07:44	6	6	9.65	9.45	-3.65	-3.45	12.5925		13.3225		11.9025
07:45-07:59	8	8	9.65	9.45	-1.65	-1.45	2.3925		2.7225		2.1025
08:00-08:14	10	9	9.65	9.45	0.35	-0.45	-0.1575		0.1225		0.2025
08:15-08:29	11	11	9.65	9.45	1.35	1.55	2.0925		1.8225		2.4025
08:30-08:44	13	12	9.65	9.45	3.35	2.55	8.5425		11.2225		6.5025
08:45-08:59	14	14	9.65	9.45	4.35	4.55	19.7925		18.9225		20.7025
09:00-09:14	13	13	9.65	9.45	3.35	3.55	11.8925		11.2225		12.6025
09:15-09:29	16	16	9.65	9.45	6.35	6.55	41.5925		40.3225		42.9025
09:30-09:44	18	17	9.65	9.45	8.35	7.55	63.0425		69.7225		57.0025
09:45-09:59	14	14	9.65	9.45	4.35	4.55	19.7925		18.9225		20.7025
10:00-10:14	11	11	9.65	9.45	1.35	1.55	2.0925		1.8225		2.4025
10:15-10:29	6	5	9.65	9.45	-3.65	-4.45	16.2425		13.3225		19.8025
10:30-10:44	7	7	9.65	9.45	-2.65	-2.45	6.4925		7.0225		6.0025
10:45-10:59	8	8	9.65	9.45	-1.65	-1.45	2.3925		2.7225		2.1025
11:00-11:14	8	8	9.65	9.45	-1.65	-1.45	2.3925		2.7225		2.1025
11:15-11:29	10	10	9.65	9.45	0.35	0.55	0.1925		0.1225		0.3025
11:30-11:44	8	9	9.65	9.45	-1.65	-0.45	0.7425		2.7225		0.2025
11:45-11:59	5	5	9.65	9.45	-4.65	-4.45	20.6925		21.6225		19.8025
					xi-xjun	yi-yjun	Multiply	Sum Multiply	(xi-xjun)2	(xi-xjun)2的合	(yi-yjun)2	Sum (yi-yjun)2	Sum x*y	Sqrt (sum x*y)	Divide
	AR03
	probabilistic value	actual value
07:00-07:14	2	1	8.625	8.25	-6.625	-7.25	48.0312	120.75	43.8906	119.875	52.5625	123.5	14804.6	121.674	0.992406
07:15-07:29	5	5	8.625	8.25	-3.625	-3.25	11.7812		13.1406		10.5625
07:30-07:44	6	6	8.625	8.25	-2.625	-2.25	5.90625		6.89062		5.0625
07:45-07:59	8	8	8.625	8.25	-0.625	-0.25	0.15625		0.390625		0.0625
08:00-08:14	10	9	8.625	8.25	1.375	0.75	1.03125		1.89062		0.5625
08:15-08:29	11	11	8.625	8.25	2.375	2.75	6.53125		5.64062		7.5625
08:30-08:44	13	12	8.625	8.25	4.375	3.75	16.4062		19.1406		14.0625
08:45-08:59	14	14	8.625	8.25	5.375	5.75	30.9062		28.8906		33.0625
09:00-09:14	13	13	10.33	10.25	2.67	2.75	7.3425	181	7.1289	186.667	7.5625	178.25	33273.4	182.41	0.992271
09:15-09:29	16	16	10.33	10.25	5.67	5.75	32.6025		32.1489		33.0625
09:30-09:44	18	17	10.33	10.25	7.67	6.75	51.7725		58.8289		45.5625
09:45-09:59	14	14	10.33	10.25	3.67	3.75	13.7625		13.4689		14.0625
10:00-10:14	11	11	10.33	10.25	0.67	0.75	0.5025		0.4489		0.5625
10:15-10:29	6	5	10.33	10.25	-4.33	-5.25	22.7325		18.7489		27.5625
10:30-10:44	7	7	10.33	10.25	-3.33	-3.25	10.8225		11.0889		10.5625
10:45-10:59	8	8	10.33	10.25	-2.33	-2.25	5.2425		5.4289		5.0625
11:00-11:14	8	8	10.33	10.25	-2.33	-2.25	5.2425		5.4289		5.0625
11:15-11:29	10	10	10.33	10.25	-0.33	-0.25	0.0825		0.1089		0.0625
11:30-11:44	8	9	10.33	10.25	-2.33	-1.25	2.9125		5.4289		1.5625
11:45-11:59	5	5	10.33	10.25	-5.33	-5.25	27.9825		28.4089		27.5625

## Sheet: AR04 Correlation Test
	AR04				xi-xjun	yi-yjun	Multiply	Sum Multiply	(xi-xjun)2	(xi-xjun)2的合	(yi-yjun)2	Sum (yi-yjun)2	Sum x*y	Sqrt (sum x*y)	Divide
	probabilistic value	actual value
07:00-07:14	1	1	5.05	4.9	-4.05	-3.9	15.795	200.1	16.4025	188.95	15.21	217.8	41153.3	202.863	0.986381
07:15-07:29	3	1	5.05	4.9	-2.05	-3.9	7.995		4.2025		15.21
07:30-07:44	0	0	5.05	4.9	-5.05	-4.9	24.745		25.5025		24.01
07:45-07:59	4	4	5.05	4.9	-1.05	-0.9	0.945		1.1025		0.81
08:00-08:14	2	2	5.05	4.9	-3.05	-2.9	8.845		9.3025		8.41
08:15-08:29	5	5	5.05	4.9	-0.05	0.1	-0.005		0.0025		0.01
08:30-08:44	7	7	5.05	4.9	1.95	2.1	4.095		3.8025		4.41
08:45-08:59	12	13	5.05	4.9	6.95	8.1	56.295		48.3025		65.61
09:00-09:14	10	10	5.05	4.9	4.95	5.1	25.245		24.5025		26.01
09:15-09:29	8	8	5.05	4.9	2.95	3.1	9.145		8.7025		9.61
09:30-09:44	8	8	5.05	4.9	2.95	3.1	9.145		8.7025		9.61
09:45-09:59	3	3	5.05	4.9	-2.05	-1.9	3.895		4.2025		3.61
10:00-10:14	6	5	5.05	4.9	0.95	0.1	0.095		0.9025		0.01
10:15-10:29	8	8	5.05	4.9	2.95	3.1	9.145		8.7025		9.61
10:30-10:44	4	4	5.05	4.9	-1.05	-0.9	0.945		1.1025		0.81
10:45-10:59	1	1	5.05	4.9	-4.05	-3.9	15.795		16.4025		15.21
11:00-11:14	4	3	5.05	4.9	-1.05	-1.9	1.995		1.1025		3.61
11:15-11:29	3	3	5.05	4.9	-2.05	-1.9	3.895		4.2025		3.61
11:30-11:44	6	6	5.05	4.9	0.95	1.1	1.045		0.9025		1.21
11:45-11:59	6	6	5.05	4.9	0.95	1.1	1.045		0.9025		1.21
					xi-xjun	yi-yjun	Multiply	Sum Multiply	(xi-xjun)2	(xi-xjun)2的合	(yi-yjun)2	Sum (yi-yjun)2	Sum x*y	Sqrt (sum x*y)	Divide
	AR04
	probabilistic value	actual value
07:00-07:14	1	1	4.25	4.125	-3.25	-3.125	10.1562	113.75	10.5625	103.5	9.76562	128.875	13338.6	115.493	0.984911
07:15-07:29	3	1	4.25	4.125	-1.25	-3.125	3.90625		1.5625		9.76562
07:30-07:44	0	0	4.25	4.125	-4.25	-4.125	17.5312		18.0625		17.0156
07:45-07:59	4	4	4.25	4.125	-0.25	-0.125	0.03125		0.0625		0.015625
08:00-08:14	2	2	4.25	4.125	-2.25	-2.125	4.78125		5.0625		4.51562
08:15-08:29	5	5	4.25	4.125	0.75	0.875	0.65625		0.5625		0.765625
08:30-08:44	7	7	4.25	4.125	2.75	2.875	7.90625		7.5625		8.26562
08:45-08:59	12	13	4.25	4.125	7.75	8.875	68.7812		60.0625		78.7656
09:00-09:14	10	10	5.58	5.42	4.42	4.58	20.2436	78.0832	19.5364	76.9168	20.9764	80.9168	6223.86	78.8915	0.989755
09:15-09:29	8	8	5.58	5.42	2.42	2.58	6.2436		5.8564		6.6564
09:30-09:44	8	8	5.58	5.42	2.42	2.58	6.2436		5.8564		6.6564
09:45-09:59	3	3	5.58	5.42	-2.58	-2.42	6.2436		6.6564		5.8564
10:00-10:14	6	5	5.58	5.42	0.42	-0.42	-0.1764		0.1764		0.1764
10:15-10:29	8	8	5.58	5.42	2.42	2.58	6.2436		5.8564		6.6564
10:30-10:44	4	4	5.58	5.42	-1.58	-1.42	2.2436		2.4964		2.0164
10:45-10:59	1	1	5.58	5.42	-4.58	-4.42	20.2436		20.9764		19.5364
11:00-11:14	4	3	5.58	5.42	-1.58	-2.42	3.8236		2.4964		5.8564
11:15-11:29	3	3	5.58	5.42	-2.58	-2.42	6.2436		6.6564		5.8564
11:30-11:44	6	6	5.58	5.42	0.42	0.58	0.2436		0.1764		0.3364
11:45-11:59	6	6	5.58	5.42	0.42	0.58	0.2436		0.1764		0.3364

## Sheet: AR05 Correlation Test
	AR05				xi-xjun	yi-yjun	Multiply	Sum Multiply	(xi-xjun)2	(xi-xjun)2的合	(yi-yjun)2	Sum (yi-yjun)2	Sum x*y	Sqrt (sum x*y)	Divide
	probabilistic value	actual value
07:00-07:14	5	5	12.4	12.25	-7.4	-7.25	53.65	425	54.76	442.8	52.5625	415.75	184094	429.062	0.990533
07:15-07:29	3	3	12.4	12.25	-9.4	-9.25	86.95		88.36		85.5625
07:30-07:44	8	7	12.4	12.25	-4.4	-5.25	23.1		19.36		27.5625
07:45-07:59	13	13	12.4	12.25	0.6	0.75	0.45		0.36		0.5625
08:00-08:14	13	12	12.4	12.25	0.6	-0.25	-0.15		0.36		0.0625
08:15-08:29	8	8	12.4	12.25	-4.4	-4.25	18.7		19.36		18.0625
08:30-08:44	12	12	12.4	12.25	-0.4	-0.25	0.1		0.16		0.0625
08:45-08:59	20	20	12.4	12.25	7.6	7.75	58.9		57.76		60.0625
09:00-09:14	21	19	12.4	12.25	8.6	6.75	58.05		73.96		45.5625
09:15-09:29	13	13	12.4	12.25	0.6	0.75	0.45		0.36		0.5625
09:30-09:44	14	14	12.4	12.25	1.6	1.75	2.8		2.56		3.0625
09:45-09:59	11	12	12.4	12.25	-1.4	-0.25	0.35		1.96		0.0625
10:00-10:14	9	9	12.4	12.25	-3.4	-3.25	11.05		11.56		10.5625
10:15-10:29	9	9	12.4	12.25	-3.4	-3.25	11.05		11.56		10.5625
10:30-10:44	10	10	12.4	12.25	-2.4	-2.25	5.4		5.76		5.0625
10:45-10:59	12	12	12.4	12.25	-0.4	-0.25	0.1		0.16		0.0625
11:00-11:14	14	15	12.4	12.25	1.6	2.75	4.4		2.56		7.5625
11:15-11:29	20	20	12.4	12.25	7.6	7.75	58.9		57.76		60.0625
11:30-11:44	16	16	12.4	12.25	3.6	3.75	13.5		12.96		14.0625
11:45-11:59	17	16	12.4	12.25	4.6	3.75	17.25		21.16		14.0625
					xi-xjun	yi-yjun	Multiply	Sum Multiply	(xi-xjun)2	(xi-xjun)2的合	(yi-yjun)2	Sum (yi-yjun)2	Sum x*y	Sqrt (sum x*y)	Divide
	AR05
	probabilistic value	actual value
07:00-07:14	5	5	10.25	10	-5.25	-5	26.25	203	27.5625	203.5	25	204	41514	203.75	0.99632
07:15-07:29	3	3	10.25	10	-7.25	-7	50.75		52.5625		49
07:30-07:44	8	7	10.25	10	-2.25	-3	6.75		5.0625		9
07:45-07:59	13	13	10.25	10	2.75	3	8.25		7.5625		9
08:00-08:14	13	12	10.25	10	2.75	2	5.5		7.5625		4
08:15-08:29	8	8	10.25	10	-2.25	-2	4.5		5.0625		4
08:30-08:44	12	12	10.25	10	1.75	2	3.5		3.0625		4
08:45-08:59	20	20	10.25	10	9.75	10	97.5		95.0625		100
09:00-09:14	21	19	13.83	13.75	7.17	5.25	37.6425	157.5	51.4089	177.667	27.5625	144.25	25628.4	160.089	0.983829
09:15-09:29	13	13	13.83	13.75	-0.83	-0.75	0.6225		0.6889		0.5625
09:30-09:44	14	14	13.83	13.75	0.17	0.25	0.0425		0.0289		0.0625
09:45-09:59	11	12	13.83	13.75	-2.83	-1.75	4.9525		8.0089		3.0625
10:00-10:14	9	9	13.83	13.75	-4.83	-4.75	22.9425		23.3289		22.5625
10:15-10:29	9	9	13.83	13.75	-4.83	-4.75	22.9425		23.3289		22.5625
10:30-10:44	10	10	13.83	13.75	-3.83	-3.75	14.3625		14.6689		14.0625
10:45-10:59	12	12	13.83	13.75	-1.83	-1.75	3.2025		3.3489		3.0625
11:00-11:14	14	15	13.83	13.75	0.17	1.25	0.2125		0.0289		1.5625
11:15-11:29	20	20	13.83	13.75	6.17	6.25	38.5625		38.0689		39.0625
11:30-11:44	16	16	13.83	13.75	2.17	2.25	4.8825		4.7089		5.0625
11:45-11:59	17	16	13.83	13.75	3.17	2.25	7.1325		10.0489		5.0625

## Sheet: AR06 Correlation Test
	AR06				xi-xjun	yi-yjun	Multiply	Sum Multiply	(xi-xjun)2	(xi-xjun)2的合	(yi-yjun)2	Sum (yi-yjun)2	Sum x*y	Sqrt (sum x*y)	Divide
	probabilistic value	actual value
07:00-07:14	1	1	1.25	1.05	-0.25	-0.05	0.0125	8.75	0.0625	9.75	0.0025	12.95	126.262	11.2367	0.778701
07:15-07:29	1	0	1.25	1.05	-0.25	-1.05	0.2625		0.0625		1.1025
07:30-07:44	1	1	1.25	1.05	-0.25	-0.05	0.0125		0.0625		0.0025
07:45-07:59	2	1	1.25	1.05	0.75	-0.05	-0.0375		0.5625		0.0025
08:00-08:14	0	0	1.25	1.05	-1.25	-1.05	1.3125		1.5625		1.1025
08:15-08:29	2	2	1.25	1.05	0.75	0.95	0.7125		0.5625		0.9025
08:30-08:44	3	3	1.25	1.05	1.75	1.95	3.4125		3.0625		3.8025
08:45-08:59	1	0	1.25	1.05	-0.25	-1.05	0.2625		0.0625		1.1025
09:00-09:14	1	1	1.25	1.05	-0.25	-0.05	0.0125		0.0625		0.0025
09:15-09:29	2	2	1.25	1.05	0.75	0.95	0.7125		0.5625		0.9025
09:30-09:44	1	0	1.25	1.05	-0.25	-1.05	0.2625		0.0625		1.1025
09:45-09:59	1	1	1.25	1.05	-0.25	-0.05	0.0125		0.0625		0.0025
10:00-10:14	1	1	1.25	1.05	-0.25	-0.05	0.0125		0.0625		0.0025
10:15-10:29	0	0	1.25	1.05	-1.25	-1.05	1.3125		1.5625		1.1025
10:30-10:44	1	1	1.25	1.05	-0.25	-0.05	0.0125		0.0625		0.0025
10:45-10:59	2	1	1.25	1.05	0.75	-0.05	-0.0375		0.5625		0.0025
11:00-11:14	1	1	1.25	1.05	-0.25	-0.05	0.0125		0.0625		0.0025
11:15-11:29	2	2	1.25	1.05	0.75	0.95	0.7125		0.5625		0.9025
11:30-11:44	1	1	1.25	1.05	-0.25	-0.05	0.0125		0.0625		0.0025
11:45-11:59	1	2	1.25	1.05	-0.25	0.95	-0.2375		0.0625		0.9025
					xi-xjun	yi-yjun	Multiply	Sum Multiply	(xi-xjun)2	(xi-xjun)2的合	(yi-yjun)2	Sum (yi-yjun)2	Sum x*y	Sqrt (sum x*y)	Divide
	AR06
	probabilistic value	actual value
07:00-07:14	1	1	1.375	1	-0.375	0	0	6	0.140625	5.875	0	8	47	6.85565	0.87519
07:15-07:29	1	0	1.375	1	-0.375	-1	0.375		0.140625		1
07:30-07:44	1	1	1.375	1	-0.375	0	0		0.140625		0
07:45-07:59	2	1	1.375	1	0.625	0	0		0.390625		0
08:00-08:14	0	0	1.375	1	-1.375	-1	1.375		1.89062		1
08:15-08:29	2	2	1.375	1	0.625	1	0.625		0.390625		1
08:30-08:44	3	3	1.375	1	1.625	2	3.25		2.64062		4
08:45-08:59	1	0	1.375	1	-0.375	-1	0.375		0.140625		1
09:00-09:14	1	1	1.17	1.08	-0.17	-0.08	0.0136	2.8332	0.0289	3.6668	0.0064	4.9168	18.0289	4.24605	0.667256
09:15-09:29	2	2	1.17	1.08	0.83	0.92	0.7636		0.6889		0.8464
09:30-09:44	1	0	1.17	1.08	-0.17	-1.08	0.1836		0.0289		1.1664
09:45-09:59	1	1	1.17	1.08	-0.17	-0.08	0.0136		0.0289		0.0064
10:00-10:14	1	1	1.17	1.08	-0.17	-0.08	0.0136		0.0289		0.0064
10:15-10:29	0	0	1.17	1.08	-1.17	-1.08	1.2636		1.3689		1.1664
10:30-10:44	1	1	1.17	1.08	-0.17	-0.08	0.0136		0.0289		0.0064
10:45-10:59	2	1	1.17	1.08	0.83	-0.08	-0.0664		0.6889		0.0064
11:00-11:14	1	1	1.17	1.08	-0.17	-0.08	0.0136		0.0289		0.0064
11:15-11:29	2	2	1.17	1.08	0.83	0.92	0.7636		0.6889		0.8464
11:30-11:44	1	1	1.17	1.08	-0.17	-0.08	0.0136		0.0289		0.0064
11:45-11:59	1	2	1.17	1.08	-0.17	0.92	-0.1564		0.0289		0.8464

## Sheet: AR07 Correlation Test
	AR07				xi-xjun	yi-yjun	Multiply	Sum Multiply	(xi-xjun)2	(xi-xjun)2的合	(yi-yjun)2	Sum (yi-yjun)2	Sum x*y	Sqrt (sum x*y)	Divide
	probabilistic value	actual value
07:00-07:14	0	0	1.9	1.55	-1.9	-1.55	2.945	18.1	3.61	23.8	2.4025	18.95	451.01	21.237	0.852286
07:15-07:29	1	1	1.9	1.55	-0.9	-0.55	0.495		0.81		0.3025
07:30-07:44	2	1	1.9	1.55	0.1	-0.55	-0.055		0.01		0.3025
07:45-07:59	1	1	1.9	1.55	-0.9	-0.55	0.495		0.81		0.3025
08:00-08:14	2	2	1.9	1.55	0.1	0.45	0.045		0.01		0.2025
08:15-08:29	1	1	1.9	1.55	-0.9	-0.55	0.495		0.81		0.3025
08:30-08:44	2	0	1.9	1.55	0.1	-1.55	-0.155		0.01		2.4025
08:45-08:59	3	3	1.9	1.55	1.1	1.45	1.595		1.21		2.1025
09:00-09:14	3	3	1.9	1.55	1.1	1.45	1.595		1.21		2.1025
09:15-09:29	3	2	1.9	1.55	1.1	0.45	0.495		1.21		0.2025
09:30-09:44	0	0	1.9	1.55	-1.9	-1.55	2.945		3.61		2.4025
09:45-09:59	1	1	1.9	1.55	-0.9	-0.55	0.495		0.81		0.3025
10:00-10:14	3	2	1.9	1.55	1.1	0.45	0.495		1.21		0.2025
10:15-10:29	1	1	1.9	1.55	-0.9	-0.55	0.495		0.81		0.3025
10:30-10:44	2	2	1.9	1.55	0.1	0.45	0.045		0.01		0.2025
10:45-10:59	4	3	1.9	1.55	2.1	1.45	3.045		4.41		2.1025
11:00-11:14	1	1	1.9	1.55	-0.9	-0.55	0.495		0.81		0.3025
11:15-11:29	2	2	1.9	1.55	0.1	0.45	0.045		0.01		0.2025
11:30-11:44	3	3	1.9	1.55	1.1	1.45	1.595		1.21		2.1025
11:45-11:59	3	2	1.9	1.55	1.1	0.45	0.495		1.21		0.2025
					xi-xjun	yi-yjun	Multiply	Sum Multiply	(xi-xjun)2	(xi-xjun)2的合	(yi-yjun)2	Sum (yi-yjun)2	Sum x*y	Sqrt (sum x*y)	Divide
	AR07
	probabilistic value	actual value
07:00-07:14	0	0	1.5	1.125	-1.5	-1.125	1.6875	4.5	2.25	6	1.26562	6.875	41.25	6.42262	0.700649
07:15-07:29	1	1	1.5	1.125	-0.5	-0.125	0.0625		0.25		0.015625
07:30-07:44	2	1	1.5	1.125	0.5	-0.125	-0.0625		0.25		0.015625
07:45-07:59	1	1	1.5	1.125	-0.5	-0.125	0.0625		0.25		0.015625
08:00-08:14	2	2	1.5	1.125	0.5	0.875	0.4375		0.25		0.765625
08:15-08:29	1	1	1.5	1.125	-0.5	-0.125	0.0625		0.25		0.015625
08:30-08:44	2	0	1.5	1.125	0.5	-1.125	-0.5625		0.25		1.26562
08:45-08:59	3	3	1.5	1.125	1.5	1.875	2.8125		2.25		3.51562
09:00-09:14	3	3	2.17	1.83	0.83	1.17	0.9711	11.3332	0.6889	15.6668	1.3689	9.6668	151.448	12.3064	0.920918
09:15-09:29	3	2	2.17	1.83	0.83	0.17	0.1411		0.6889		0.0289
09:30-09:44	0	0	2.17	1.83	-2.17	-1.83	3.9711		4.7089		3.3489
09:45-09:59	1	1	2.17	1.83	-1.17	-0.83	0.9711		1.3689		0.6889
10:00-10:14	3	2	2.17	1.83	0.83	0.17	0.1411		0.6889		0.0289
10:15-10:29	1	1	2.17	1.83	-1.17	-0.83	0.9711		1.3689		0.6889
10:30-10:44	2	2	2.17	1.83	-0.17	0.17	-0.0289		0.0289		0.0289
10:45-10:59	4	3	2.17	1.83	1.83	1.17	2.1411		3.3489		1.3689
11:00-11:14	1	1	2.17	1.83	-1.17	-0.83	0.9711		1.3689		0.6889
11:15-11:29	2	2	2.17	1.83	-0.17	0.17	-0.0289		0.0289		0.0289
11:30-11:44	3	3	2.17	1.83	0.83	1.17	0.9711		0.6889		1.3689
11:45-11:59	3	2	2.17	1.83	0.83	0.17	0.1411		0.6889		0.0289

## Sheet: AR08 Correlation Test
	AR08				xi-xjun	yi-yjun	Multiply	Sum Multiply	(xi-xjun)2	(xi-xjun)2的合	(yi-yjun)2	Sum (yi-yjun)2	Sum x*y	Sqrt (sum x*y)	Divide
	probabilistic value	actual value
07:00-07:14	1	1	1.35	0.95	-0.35	0.05	-0.0175	16.35	0.1225	20.55	0.0025	18.95	389.423	19.7338	0.828528
07:15-07:29	2	0	1.35	0.95	0.65	-0.95	-0.6175		0.4225		0.9025
07:30-07:44	1	1	1.35	0.95	-0.35	0.05	-0.0175		0.1225		0.0025
07:45-07:59	0	0	1.35	0.95	-1.35	-0.95	1.2825		1.8225		0.9025
08:00-08:14	1	0	1.35	0.95	-0.35	-0.95	0.3325		0.1225		0.9025
08:15-08:29	3	2	1.35	0.95	1.65	1.05	1.7325		2.7225		1.1025
08:30-08:44	0	0	1.35	0.95	-1.35	-0.95	1.2825		1.8225		0.9025
08:45-08:59	2	1	1.35	0.95	0.65	0.05	0.0325		0.4225		0.0025
09:00-09:14	2	2	1.35	0.95	0.65	1.05	0.6825		0.4225		1.1025
09:15-09:29	1	1	1.35	0.95	-0.35	0.05	-0.0175		0.1225		0.0025
09:30-09:44	1	0	1.35	0.95	-0.35	-0.95	0.3325		0.1225		0.9025
09:45-09:59	0	0	1.35	0.95	-1.35	-0.95	1.2825		1.8225		0.9025
10:00-10:14	1	1	1.35	0.95	-0.35	0.05	-0.0175		0.1225		0.0025
10:15-10:29	2	1	1.35	0.95	0.65	0.05	0.0325		0.4225		0.0025
10:30-10:44	1	1	1.35	0.95	-0.35	0.05	-0.0175		0.1225		0.0025
10:45-10:59	0	0	1.35	0.95	-1.35	-0.95	1.2825		1.8225		0.9025
11:00-11:14	4	4	1.35	0.95	2.65	3.05	8.0825		7.0225		9.3025
11:15-11:29	2	1	1.35	0.95	0.65	0.05	0.0325		0.4225		0.0025
11:30-11:44	2	2	1.35	0.95	0.65	1.05	0.6825		0.4225		1.1025
11:45-11:59	1	1	1.35	0.95	-0.35	0.05	-0.0175		0.1225		0.0025
					xi-xjun	yi-yjun	Multiply	Sum Multiply	(xi-xjun)2	(xi-xjun)2的合	(yi-yjun)2	Sum (yi-yjun)2	Sum x*y	Sqrt (sum x*y)	Divide
	AR08
	probabilistic value	actual value
07:00-07:14	1	1	1.25	0.625	-0.25	0.375	-0.09375	3.75	0.0625	7.5	0.140625	3.875	29.0625	5.39096	0.695608
07:15-07:29	2	0	1.25	0.625	0.75	-0.625	-0.46875		0.5625		0.390625
07:30-07:44	1	1	1.25	0.625	-0.25	0.375	-0.09375		0.0625		0.140625
07:45-07:59	0	0	1.25	0.625	-1.25	-0.625	0.78125		1.5625		0.390625
08:00-08:14	1	0	1.25	0.625	-0.25	-0.625	0.15625		0.0625		0.390625
08:15-08:29	3	2	1.25	0.625	1.75	1.375	2.40625		3.0625		1.89062
08:30-08:44	0	0	1.25	0.625	-1.25	-0.625	0.78125		1.5625		0.390625
08:45-08:59	2	1	1.25	0.625	0.75	0.375	0.28125		0.5625		0.140625
09:00-09:14	2	2	1.42	1.17	0.58	0.83	0.4814	12.1668	0.3364	12.9168	0.6889	13.6668	176.531	13.2865	0.915726
09:15-09:29	1	1	1.42	1.17	-0.42	-0.17	0.0714		0.1764		0.0289
09:30-09:44	1	0	1.42	1.17	-0.42	-1.17	0.4914		0.1764		1.3689
09:45-09:59	0	0	1.42	1.17	-1.42	-1.17	1.6614		2.0164		1.3689
10:00-10:14	1	1	1.42	1.17	-0.42	-0.17	0.0714		0.1764		0.0289
10:15-10:29	2	1	1.42	1.17	0.58	-0.17	-0.0986		0.3364		0.0289
10:30-10:44	1	1	1.42	1.17	-0.42	-0.17	0.0714		0.1764		0.0289
10:45-10:59	0	0	1.42	1.17	-1.42	-1.17	1.6614		2.0164		1.3689
11:00-11:14	4	4	1.42	1.17	2.58	2.83	7.3014		6.6564		8.0089
11:15-11:29	2	1	1.42	1.17	0.58	-0.17	-0.0986		0.3364		0.0289
11:30-11:44	2	2	1.42	1.17	0.58	0.83	0.4814		0.3364		0.6889
11:45-11:59	1	1	1.42	1.17	-0.42	-0.17	0.0714		0.1764		0.0289

## Sheet: AR05 analysis fig.9
	Deterministic Value	Probabilistic Value	Actual Value	Capacity
07:00-07:14	5	5	5	15
07:15-07:29	3	3	3	15
07:30-07:44	7	7	7	15
07:45-07:59	13	13	13	15
08:00-08:14	12	13	12	15
08:15-08:29	12	11	12	15
08:30-08:44	12	12	12	15
08:45-08:59	14	20	20	15
09:00-09:14	19	21	19	15
09:15-09:29	16	13	13	15
09:30-09:44	13	14	14	15
09:45-09:59	12	11	12	15
10:00-10:14	9	9	9	15
10:15-10:29	9	9	9	15
10:30-10:44	9	10	10	15
10:45-10:59	13	12	12	15
11:00-11:14	15	15	15	15
11:15-11:29	18	20	20	15
11:30-11:44	16	16	16	15
11:45-11:59	15	16	16	15

## Sheet: probabilistic and actual value
sector	AR01		AR02		AR03		AR04		AR05		AR06		AR07		AR08
Interval	probabilistic value	actual value	probabilistic value	actual value	probabilistic value	actual value	probabilistic value	actual value	probabilistic value	actual value	probabilistic value	actual value	probabilistic value	actual value	probabilistic value	actual value
07:00-07:14	2	2	0	0	2	1	1	1	5	5	1	1	0	0	1	1
07:15-07:29	2	2	1	1	5	5	3	1	3	3	1	0	1	1	2	0
07:30-07:44	0	0	2	2	6	6	0	0	8	7	1	1	2	1	1	1
07:45-07:59	2	1	3	2	8	8	4	4	13	13	2	1	1	1	0	0
08:00-08:14	1	2	3	3	10	9	2	2	13	12	0	0	2	2	1	0
08:15-08:29	0	1	4	4	11	11	5	5	8	8	2	2	1	1	3	2
08:30-08:44	0	0	6	6	13	12	7	7	12	12	3	3	2	0	0	0
08:45-08:59	2	1	7	6	14	14	12	13	20	20	1	0	3	3	2	1
09:00-09:14	2	2	6	6	13	13	10	10	21	19	1	1	3	3	2	2
09:15-09:29	4	4	8	8	16	16	8	8	13	13	2	2	3	2	1	1
09:30-09:44	5	6	9	9	18	17	8	8	14	14	1	0	0	0	1	0
09:45-09:59	3	3	9	8	14	14	3	3	11	12	1	1	1	1	0	0
10:00-10:14	3	2	11	11	11	11	6	5	9	9	1	1	3	2	1	1
10:15-10:29	0	1	7	7	6	5	8	8	9	9	0	0	1	1	2	1
10:30-10:44	3	3	10	10	7	7	4	4	10	10	1	1	2	2	1	1
10:45-10:59	3	3	9	9	8	8	1	1	12	12	2	1	4	3	0	0
11:00-11:14	3	2	10	8	8	8	4	3	14	15	1	1	1	1	4	4
11:15-11:29	3	3	11	11	10	10	3	3	20	20	2	2	2	2	2	1
11:30-11:44	0	0	8	8	8	9	6	6	16	16	1	1	3	3	2	2
11:45-11:59	0	0	11	10	5	5	6	6	17	16	1	2	3	2	1	1
